# Supplementary material for: Synthesis of P-chiral phosphine compounds by palladium-catalyzed C–P coupling reactions
Source: Royal Society of Chemistry journal article supplement (doi:10.1039/d0cc05340f), 2020-01-01
Supplement: d0cc05340f1.pdf [file d0cc05340f1.pdf]

## Supporting Information

### Synthesis of P-Chiral Phosphine Compounds by Palladium-Catalyzed C–P Coupling Reactions

Cuiying Wang,<sup>&a</sup> Chang-Duo Yue,<sup>&a</sup> Jia Yuan,<sup>\*a</sup> Jia-Lian Zheng,<sup>a</sup> Ying Zhang,<sup>a</sup> Hong Yu,<sup>a</sup> Jian Chen,<sup>a</sup> Sixuan Meng,<sup>a</sup> Yang Yu,<sup>c</sup> Guang-Ao Yu,<sup>\*a</sup> and Chi-Ming Che<sup>\*b</sup>

& These authors contributed equally to this work.

#### Table of Contents

|                                                                                                           |     |
|-----------------------------------------------------------------------------------------------------------|-----|
| 1. General considerations. ....                                                                           | S2  |
| 2. Procedures for palladium-catalyzed C–P coupling reactions .....                                        | S2  |
| 3. Procedures for palladium-catalyzed C–P coupling reactions under microwave conditions .....             | S12 |
| 4. X-ray Structural Determination.....                                                                    | S15 |
| 5. References .....                                                                                       | S16 |
| 6. <sup>1</sup> H, <sup>13</sup> C, <sup>19</sup> F and <sup>31</sup> P NMR spectra for all products..... | S17 |
| 7. HPLC spectra for all products.....                                                                     | S77 |

## 1. General considerations

All manipulations of air-sensitive materials were carried out under an atmosphere of dry argon by using modified Schlenk line and glovebox techniques. Aryl halides, heteroaryl halides, bases, and catalysts were purchased from Alfa-Aesar and J&K Scientific Ltd. All solvents were distilled from appropriate drying agents under argon before use. The  $^1\text{H}$ ,  $^{13}\text{C}$ ,  $^{19}\text{F}$  and  $^{31}\text{P}$  NMR spectroscopic data were recorded on Bruker Mercury Plus 400 MHz NMR spectrometers. Chemical shifts ( $\delta$ ) for  $^1\text{H}$  and  $^{13}\text{C}$  are referenced to internal solvent resonances and reported relative to  $\text{SiMe}_4$ . Chemical shifts for  $^{19}\text{F}$  are reported relative to an external  $\text{CFCl}_3$  standard. Chemical shifts for  $^{31}\text{P}$  are reported relative to an external 85%  $\text{H}_3\text{PO}_4$  standard. High resolution mass analysis is performed on Varian 7.0T Fourier-transform mass spectrometry with ESI resource. High performance liquid chromatography (HPLC) was performed on Agilent 1100 series chromatographs using a Daicel Chiracel AD-H (4.6 mm  $\phi$  x 250 mm) or OD-H (4.6 mm  $\phi$  x 250 mm) or AS-H (4.6 mm  $\phi$  x 250 mm) column or IBN-H (4.6 mm  $\phi$  x 250 mm) with *n*-hexane/*i*-PrOH as an eluent. Microwave reaction was determined by Discover SP microwave instrument. (*S*)-*tert*-butyl(methyl)phosphine borane and (*R*)-*tert*-butyl(methyl)phosphine borane was synthesized according to the published procedures.<sup>[1]</sup>

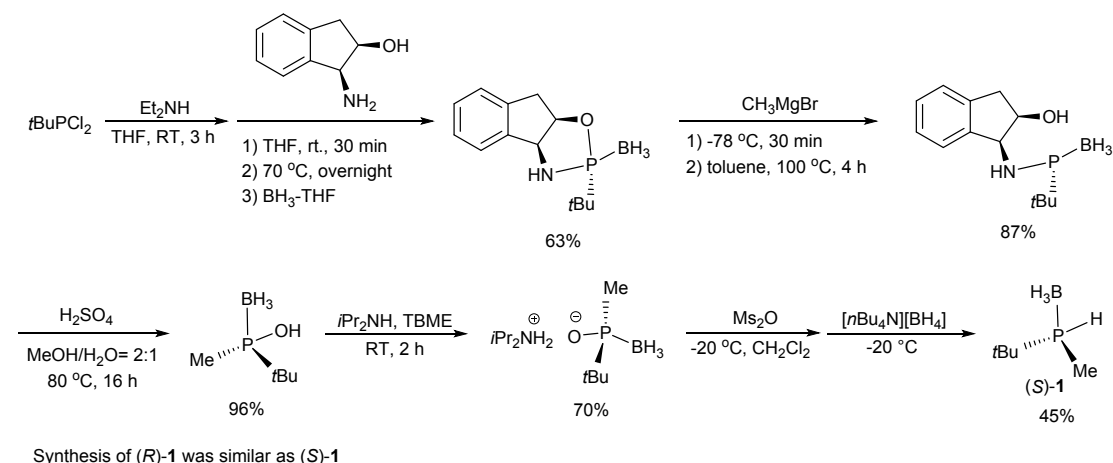

**Scheme S1.** Synthesis of optically pure P-stereogenic *tert*-butyl(methyl)phosphine borane<sup>[1]</sup>

## 2. Procedures for palladium-catalyzed C–P coupling reactions

To a reaction tube, (*S*)-*tert*-butyl(methyl)phosphine borane (35.0 mg, 0.3 mmol), aryl and heteroaryl halides (0.5 mmol),  $\text{Pd}(\text{OAc})_2$  (3.4 mg, 0.015 mmol), dppf (27.7 mg, 0.03 mmol), *t*BuONa (57.6 mg, 0.6 mmol) and toluene (3 mL) were added under argon. The mixture was stirred for 72 h at room temperature. After removal of volatile materials under reduced pressure, the crude product was purified by chromatograph on silica gel. (*n*-hexane / dichloromethane).

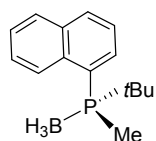

**(*R*)-*tert*-butyl(methyl)(naphthalen-1-yl)phosphine Borane.**<sup>2</sup> Performed according to the general procedure to afford 41.0 mg (71%) of (*R*)-**2a** as white solid.  $^1\text{H}$  NMR (400 MHz,  $\text{CDCl}_3$ ):  $\delta$  8.90 (d,  $J$  = 8.0 Hz, 1 H, Ar), 7.99 (d,  $J$  = 8.0 Hz, 1 H, Ar), 7.87 (d,  $J$  = 8.0 Hz, 1 H, Ar), 7.75 - 7.80 (m, 1 H, Ar), 7.61 - 7.75 (m, 1 H, Ar), 7.49 - 7.53 (m, 2 H, Ar),

1.78 (d,  $J = 12.0$  Hz, 3 H,  $\text{CH}_3$ ), 1.16 (d,  $J = 16.0$  Hz, 9 H,  $\text{C}(\text{CH}_3)_3$ ), 0.79 - 1.57 (m, 3 H,  $\text{BH}_3$ ).  $^{13}\text{C}$  NMR (101 MHz,  $\text{CDCl}_3$ ):  $\delta$  135.4 (d,  $J_{\text{C-P}} = 10.6$  Hz, Ar), 133.9 (d,  $J_{\text{C-P}} = 7.7$  Hz, Ar), 133.4 (d,  $J_{\text{C-P}} = 4.0$  Hz, Ar), 132.4 (d,  $J_{\text{C-P}} = 2.6$  Hz, Ar), 128.8 (s, Ar), 128.2 (d,  $J_{\text{C-P}} = 5.9$  Hz, Ar), 126.6 (s, Ar), 126.3 (s, Ar), 125.0 (d,  $J_{\text{C-P}} = 44.8$  Hz, Ar), 124.3 (d,  $J_{\text{C-P}} = 9.2$  Hz, Ar), 30.5 (d,  $J_{\text{C-P}} = 31.5$  Hz,  $\text{C}(\text{CH}_3)_3$ ), 25.8 (d,  $J_{\text{C-P}} = 2.9$  Hz,  $\text{C}(\text{CH}_3)_3$ ), 8.9 (d,  $J_{\text{C-P}} = 39.6$  Hz,  $\text{CH}_3$ ).  $^{31}\text{P}$  NMR (162 MHz,  $\text{CDCl}_3$ ):  $\delta$  23.8 (q,  $J = 69.7$  Hz). HPLC (Daicel Chiralcel AS-H, *n*-hexane/*i*-PrOH = 95/5, UV = 250 nm, flow rate = 1.0 mL/min)  $t_{\text{R}1} = 5.452$  min (minor) and  $t_{\text{R}2} = 6.546$  min (major), ee = 91%.  $[\alpha]_{\text{D}}^{25} = +8.5$  (c = 2.0,  $\text{CHCl}_3$ ).

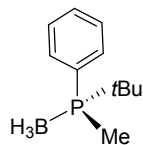

**(R)-tert-butyl(methyl)(phenyl)phosphine Borane.**<sup>2</sup> Performed according to the general procedure to afford 41 mg (71%) of (*R*)-**2b** as white solid.  $^1\text{H}$  NMR (400 MHz,  $\text{CDCl}_3$ ):  $\delta$  7.71 (t,  $J = 8.0$  Hz, 2 H, Ar), 7.39 – 7.58 (m, 3 H, Ar), 1.58 (d,  $J = 8.0$  Hz, 3 H,  $\text{CH}_3$ ), 1.11 (d,  $J = 12.0$  Hz, 9 H,  $\text{C}(\text{CH}_3)_3$ ), 0.12 – 0.97 (m, 3 H,  $\text{BH}_3$ ).  $^{13}\text{C}$  NMR (101 MHz,  $\text{CDCl}_3$ ):  $\delta$  132.9 (d,  $J_{\text{C-P}} = 8.0$  Hz, Ar), 131.1 (s, Ar), 128.3 (s, Ar), 128.2 (s, Ar), 28.5 (d,  $J_{\text{C-P}} = 33.3$  Hz,  $\text{C}(\text{CH}_3)_3$ ), 25.1 (d,  $J_{\text{C-P}} = 2.9$  Hz,  $\text{C}(\text{CH}_3)_3$ ), 5.2 (d,  $J_{\text{C-P}} = 37.8$  Hz,  $\text{CH}_3$ ).  $^{31}\text{P}$  NMR (162 MHz,  $\text{CDCl}_3$ ):  $\delta$  25.0 (q,  $J = 64.8$  Hz). HPLC (Daicel Chiralcel AS-H, *n*-hexane/*i*-PrOH = 95/5, UV = 254 nm, flow rate = 1.0 mL/min)  $t_{\text{R}1} = 7.131$  min (minor) and  $t_{\text{R}2} = 8.103$  min (major), ee = 65%.  $[\alpha]_{\text{D}}^{25} = +23.0$  (c = 2.0,  $\text{CHCl}_3$ ).

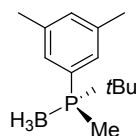

**(R)-tert-butyl(3,5-dimethylphenyl)(methyl)phosphine Borane.** Performed according to the general procedure to afford 50 mg (75%) of (*R*)-**2c** as yellow solid.  $^1\text{H}$  NMR (400 MHz,  $\text{CDCl}_3$ ):  $\delta$  7.30 (s, 1 H, Ar), 7.27 (s, 1 H, Ar), 7.12 (s, 1 H, Ar), 2.36 (s, 6 H,  $\text{CH}_3$ ), 1.53 (d,  $J = 8.0$  Hz, 3 H,  $\text{CH}_3$ ), 1.10 (d,  $J = 12.0$  Hz, 9 H,  $\text{C}(\text{CH}_3)_3$ ), 0.24 – 0.86 (m, 3 H,  $\text{BH}_3$ ).  $^{13}\text{C}$  NMR (101 MHz,  $\text{CDCl}_3$ ):  $\delta$  137.8 (d,  $J_{\text{C-P}} = 9.9$  Hz, Ar), 132.8 (d,  $J_{\text{C-P}} = 2.6$  Hz, Ar), 130.4 (d,  $J_{\text{C-P}} = 8.4$  Hz, Ar), 127.2 (d,  $J_{\text{C-P}} = 50.3$  Hz, Ar), 28.4 (d,  $J_{\text{C-P}} = 33.4$  Hz,  $\text{C}(\text{CH}_3)_3$ ), 25.2 (d,  $J_{\text{C-P}} = 2.6$  Hz,  $\text{C}(\text{CH}_3)_3$ ), 21.3 (s,  $\text{CH}_3$ ), 5.3 (d,  $J_{\text{C-P}} = 37.8$  Hz,  $\text{CH}_3$ ).  $^{31}\text{P}$  NMR (162 MHz,  $\text{CDCl}_3$ ):  $\delta$  24.3 (q,  $J = 69.7$  Hz). HRMS (ESI):  $m/z$ :  $[\text{M}+\text{H}-\text{BH}_3]^+$  calculated for  $\text{C}_{13}\text{H}_{22}\text{P}$ : 209.1454, found 209.1455. HPLC (Daicel Chiralcel AS-H, *n*-hexane/*i*-PrOH = 95/5, UV = 220 nm, flow rate = 1.0 mL/min)  $t_{\text{R}1} = 4.240$  min (minor) and  $t_{\text{R}2} = 5.678$  min (major), ee = 94%.  $[\alpha]_{\text{D}}^{25} = +38.0$  (c = 2.0,  $\text{CHCl}_3$ ).

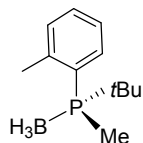

**(R)-tert-butyl(methyl)(o-tolyl)phosphine Borane.**<sup>2</sup> Performed according to the general procedure to afford 34 mg (42%) of (*R*)-**2d** as white solid.  $^1\text{H}$  NMR (400 MHz,  $\text{CDCl}_3$ ):  $\delta$  7.52 - 7.56 (m, 1 H, Ar), 7.37 (t,  $J = 8.0$  Hz, 1 H, Ar), 7.13 – 7.26 (m, 2 H, Ar), 2.66 (s, 3 H,  $\text{CH}_3$ ), 1.64 (d,  $J = 8.0$  Hz, 3 H,  $\text{CH}_3$ ), 1.14 (d,  $J = 16.0$  Hz, 9 H,  $\text{C}(\text{CH}_3)_3$ ), 0.43 – 1.10 (m, 3 H,  $\text{BH}_3$ ).  $^{13}\text{C}$  NMR (101 MHz,  $\text{CDCl}_3$ ):  $\delta$  144.1 (d,  $J_{\text{C-P}} = 10.5$  Hz, Ar), 133.9 (d,  $J_{\text{C-P}} = 6.1$  Hz, Ar), 132.1 (d,  $J_{\text{C-P}} = 8.8$  Hz, Ar), 131.0 (d,  $J_{\text{C-P}} = 2.4$  Hz, Ar), 125.7 (d,  $J_{\text{C-P}} = 46.0$  Hz, Ar), 125.3 (d,  $J_{\text{C-P}} = 8.3$  Hz, Ar), 30.5 (d,  $J_{\text{C-P}} = 31.9$  Hz,  $\text{C}(\text{CH}_3)_3$ ), 25.4 (d,  $J_{\text{C-P}} = 2.7$  Hz,  $\text{C}(\text{CH}_3)_3$ ), 23.3 (d,  $J = 3.3$  Hz,  $\text{CH}_3$ ), 8.8 (d,  $J_{\text{C-P}} = 39.0$  Hz,  $\text{CH}_3$ ).  $^{31}\text{P}$  NMR (162 MHz,  $\text{CDCl}_3$ ):  $\delta$  25.1 (q,  $J = 61.6$  Hz). HPLC (Daicel Chiralcel OD-H, *n*-hexane/*i*-PrOH = 98/2, UV = 230 nm, flow rate = 0.5 mL/min)  $t_{\text{R}1} = 12.580$  min (minor) and  $t_{\text{R}2} = 14.134$  min (major), ee = 90%.  $[\alpha]_{\text{D}}^{25} = +1.0$  (c = 2.0,  $\text{CHCl}_3$ ).

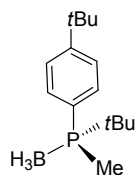

**(R)-tert-butyl(4-(tert-butyl)phenyl)(methyl)phosphine Borane.** Performed according to the general procedure to afford 67.5 mg (90%) of (*R*)-**2e** as yellow solid.  $^1\text{H}$  NMR (400 MHz,  $\text{CDCl}_3$ ):  $\delta$  7.61 – 7.65 (m, 2 H, Ar), 7.45 – 7.47 (m, 2 H, Ar), 1.55 (d,  $J = 8.0$  Hz, 3 H,  $\text{CH}_3$ ), 1.33 (s, 9 H,  $\text{C}(\text{CH}_3)_3$ ), 1.11 (d,  $J = 12.0$  Hz, 9 H,  $\text{C}(\text{CH}_3)_3$ ), 0.48 – 1.05 (m, 3 H,  $\text{BH}_3$ ).  $^{13}\text{C}$  NMR (101 MHz,  $\text{CDCl}_3$ ):  $\delta$  154.4 (d,  $J_{\text{C-P}} = 2.4$  Hz, Ar), 132.7 (d,  $J_{\text{C-P}} = 8.4$  Hz, Ar), 125.3 (d,  $J_{\text{C-P}} = 9.7$  Hz, Ar), 124.2 (d,  $J_{\text{C-P}} = 6.1$  Hz, Ar), 34.9 (s,  $\text{C}(\text{CH}_3)_3$ ), 31.2 (s,  $\text{C}(\text{CH}_3)_3$ ), 28.6 (d,  $J_{\text{C-P}} = 33.3$  Hz,  $\text{C}(\text{CH}_3)_3$ ), 25.2 (d,  $J_{\text{C-P}} = 3.0$  Hz,  $\text{C}(\text{CH}_3)_3$ ), 5.4 (d,  $J_{\text{C-P}} = 30.3$  Hz,  $\text{CH}_3$ ).  $^{31}\text{P}$  NMR (162 MHz,  $\text{CDCl}_3$ ):  $\delta$  23.7 (q,  $J = 66.4$  Hz). HRMS (ESI):  $m/z$ :  $[\text{M}+\text{H}-\text{BH}_3]^+$  calculated for  $\text{C}_{15}\text{H}_{26}\text{P}$ : 237.1767, found 237.1766. HPLC (Daicel Chiralcel AS-H, *n*-hexane/*i*-PrOH = 99/1, UV = 234 nm, flow rate = 1 mL/min)  $t_{\text{R}1} = 5.365$  min (major) and  $t_{\text{R}2} = 6.045$  min (minor), ee = 90%.  $[\alpha]_{\text{D}}^{25} = +13.0$  ( $c = 2.0$ ,  $\text{CHCl}_3$ ).

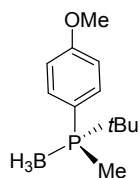

**(R)-tert-butyl(4-methoxyphenyl)(methyl)phosphine Borane.** Performed according to the general procedures to afford 47 mg (70%) of (*R*)-**2f** as white solid.  $^1\text{H}$  NMR (400 MHz,  $\text{CDCl}_3$ ):  $\delta$  7.61 - 7.65 (m, 2 H, Ar), 6.96 – 6.98 (m, 2 H, Ar), 3.85 (s, 3 H,  $\text{OCH}_3$ ), 1.54 (d,  $J = 8.0$  Hz, 3 H,  $\text{CH}_3$ ), 1.09 (d,  $J = 16.0$  Hz, 9 H,  $\text{C}(\text{CH}_3)_3$ ), 0.35 – 0.91 (m, 3 H,  $\text{BH}_3$ ).  $^{13}\text{C}$  NMR (101 MHz,  $\text{CDCl}_3$ ):  $\delta$  161.8 (d,  $J_{\text{C-P}} = 2.4$  Hz, Ar), 134.5 (d,  $J_{\text{C-P}} = 9.4$  Hz, Ar), 118.4 (d,  $J_{\text{C-P}} = 6.2$  Hz, Ar), 113.9 (d,  $J_{\text{C-P}} = 10.3$  Hz, Ar), 55.3 (s,  $\text{OCH}_3$ ), 28.7 (d,  $J_{\text{C-P}} = 30.3$  Hz,  $\text{C}(\text{CH}_3)_3$ ), 25.2 (d,  $J_{\text{C-P}} = 2.7$  Hz,  $\text{C}(\text{CH}_3)_3$ ), 5.5 (d,  $J_{\text{C-P}} = 30.3$  Hz,  $\text{CH}_3$ ).  $^{31}\text{P}$  NMR (162 MHz,  $\text{CDCl}_3$ ):  $\delta$  23.2 (q,  $J = 61.6$  Hz). HRMS (ESI):  $m/z$ :  $[\text{M}+\text{H}-\text{BH}_3]^+$  calculated for  $\text{C}_{12}\text{H}_{20}\text{OP}$ : 211.1246, found 211.1248. HPLC (Daicel Chiralcel AS-H, *n*-hexane/*i*-PrOH = 98/2, UV = 254 nm, flow rate = 0.8 mL/min)  $t_{\text{R}1} = 21.843$  min (minor) and  $t_{\text{R}2} = 23.093$  min (major), ee = 98%.  $[\alpha]_{\text{D}}^{25} = +5.0$  ( $c = 2.0$ ,  $\text{CHCl}_3$ ).

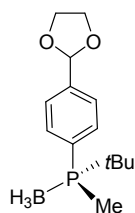

**(R)-(4-(1,3-dioxolan-2-yl)phenyl)(tert-butyl)(methyl)phosphine Borane.** Performed according to the general procedure to afford 34 mg (42%) of (*R*)-**2g** as yellow solid.  $^1\text{H}$  NMR (400 MHz,  $\text{CDCl}_3$ ):  $\delta$  7.69 – 7.78 (m, 2 H, Ar), 7.56 – 7.58 (m, 2 H, Ar), 5.84 (s, 1 H, CH), 4.10 – 4.15 (m, 2 H,  $\text{CH}_2$ ), 4.04 – 4.09 (m, 2 H,  $\text{CH}_2$ ), 1.57 (d,  $J = 9.7$  Hz, 3 H,  $\text{CH}_3$ ), 1.10 (d,  $J = 14.0$  Hz, 9 H,  $\text{C}(\text{CH}_3)_3$ ), 0.13 – 0.99 (m, 3 H,  $\text{BH}_3$ ).  $^{13}\text{C}$  NMR (101 MHz,  $\text{CDCl}_3$ ):  $\delta$  141.1 (s, Ar), 133.0 (d,  $J_{\text{C-P}} = 8.1$  Hz, Ar), 128.7 (d,  $J_{\text{C-P}} = 50.5$  Hz, Ar), 126.3 (d,  $J_{\text{C-P}} = 9.1$  Hz, Ar), 103.0 (s, CH), 65.4 (s,  $\text{CH}_2$ ), 28.6 (d,  $J_{\text{C-P}} = 40.4$  Hz,  $\text{C}(\text{CH}_3)_3$ ), 25.1 (d,  $J_{\text{C-P}} = 2.7$  Hz,  $\text{C}(\text{CH}_3)_3$ ), 5.3 (d,  $J_{\text{C-P}} = 40.4$  Hz,  $\text{CH}_3$ ).  $^{31}\text{P}$  NMR (162 MHz,  $\text{CDCl}_3$ ):  $\delta$  25.2 (q,  $J = 66.4$  Hz). HRMS (ESI):  $m/z$ :  $[\text{M}+\text{H}-\text{BH}_3]^+$  calculated for  $\text{C}_{14}\text{H}_{22}\text{O}_2\text{P}$ : 253.1352, found 253.1352. HPLC (Daicel Chiralcel AS-H, *n*-hexane/*i*-PrOH = 98/2, UV = 250 nm, flow rate = 1.0 mL/min)  $t_{\text{R}1} = 26.610$  min (major) and  $t_{\text{R}2} = 34.227$  min (minor), ee = 89%.  $[\alpha]_{\text{D}}^{25} = +11.0$  ( $c = 2.0$ ,  $\text{CHCl}_3$ ).

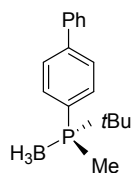

**(R)-4-(1,3-dioxolan-2-yl)phenyl(tert-butyl)(methyl)phosphine Borane.** Performed according to the general procedure to afford 34 mg (42%) of (*R*)-**2h** as yellow solid.  $^1\text{H}$  NMR (400 MHz,  $\text{CDCl}_3$ ):  $\delta$  7.75 – 7.80 (m, 2 H, Ar), 7.66 – 7.68 (m, 2 H, Ar), 7.60 – 7.61 (m, 2 H, Ar), 7.45 – 7.49 (m, 2 H, Ar), 7.37 – 7.41 (m, 1 H, Ar), 1.61 (d,  $J = 9.7$  Hz, 3 H,  $\text{CH}_3$ ), 1.15 (d,  $J = 14.0$  Hz, 9 H,  $\text{C}(\text{CH}_3)_3$ ), 0.41 – 0.88 (m, 3 H,  $\text{BH}_3$ ).  $^{13}\text{C}$  NMR (101 MHz,  $\text{CDCl}_3$ ):  $\delta$  143.9 (s, Ar), 139.9 (s, Ar), 133.3 (d,  $J_{\text{C-P}} = 8.7$  Hz, Ar), 128.9 (s, Ar), 128.0 (s, Ar), 127.2 (s, Ar), 126.9 (d,  $J_{\text{C-P}} = 9.5$  Hz, Ar), 126.3 (d,  $J_{\text{C-P}} = 51.3$  Hz, Ar), 28.6 (d,  $J_{\text{C-P}} = 34.3$  Hz,  $\text{C}(\text{CH}_3)_3$ ), 25.0 (d,  $J_{\text{C-P}} = 24.2$  Hz,  $\text{C}(\text{CH}_3)_3$ ), 5.3 (d,  $J_{\text{C-P}} = 37.4$  Hz,  $\text{CH}_3$ ).  $^{31}\text{P}$  NMR (162 MHz,  $\text{CDCl}_3$ ):  $\delta$  24.7 (q,  $J = 66.4$  Hz). HRMS (ESI):  $m/z$ :  $[\text{M}+\text{H}-\text{BH}_3]^+$  calculated for  $\text{C}_{17}\text{H}_{22}\text{P}$ : 257.1454, found 257.1454. HPLC (Daicel Chiralcel OD-H, *n*-hexane/*i*-PrOH = 95/5, UV = 250 nm, flow rate = 0.8 mL/min)  $t_{\text{R}1} = 7.891$  min (major) and  $t_{\text{R}2} = 8.692$  min (minor), ee = 79%.  $[\alpha]_{\text{D}}^{25} = +11.0$  ( $c = 2.0$ ,  $\text{CHCl}_3$ ).

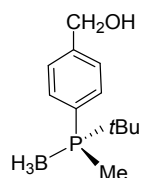

**(R)-4-(borane tert-butyl(methyl)phosphino)phenylmethanol.** Performed according to the general procedure to afford 64 mg (95%) of (*R*)-**2i** as white solid.  $^1\text{H}$  NMR (400 MHz,  $\text{CDCl}_3$ ):  $\delta$  7.68 (t,  $J = 8.7$  Hz, 2 H, Ar), 7.44 (d,  $J = 7.6$  Hz, 2 H, Ar), 4.72 (s, 2 H,  $\text{CH}_2$ ), 2.37 (s, 1 H,  $\text{CH}_2\text{OH}$ ), 1.56 (d,  $J = 9.7$  Hz, 3 H,  $\text{CH}_3$ ), 1.09 (d,  $J = 14.0$  Hz, 9 H,  $\text{C}(\text{CH}_3)_3$ ), 0.17 – 0.91 (m, 3 H,  $\text{BH}_3$ ).  $^{13}\text{C}$  NMR (101 MHz,  $\text{CDCl}_3$ ):  $\delta$  144.1 (s, Ar), 133.0 (d,  $J_{\text{C-P}} = 8.4$  Hz, Ar), 126.4 (d,  $J_{\text{C-P}} = 51.5$  Hz, Ar), 126.4 (d,  $J_{\text{C-P}} = 10.1$  Hz, Ar), 64.4 (s,  $\text{CH}_2$ ), 28.4 (d,  $J_{\text{C-P}} = 33.0$  Hz,  $\text{C}(\text{CH}_3)_3$ ), 25.0 (d,  $J_{\text{C-P}} = 2.6$  Hz,  $\text{C}(\text{CH}_3)_3$ ), 5.2 (d,  $J_{\text{C-P}} = 37.8$  Hz,  $\text{CH}_3$ ).  $^{31}\text{P}$  NMR (162 MHz,  $\text{CDCl}_3$ ):  $\delta$  24.6 (q,  $J = 68.0$  Hz). HRMS (ESI):  $m/z$ :  $[\text{M}+\text{H}-\text{BH}_3]^+$  calculated for  $\text{C}_{12}\text{H}_{20}\text{OP}$ : 211.1246, found 211.1246. HPLC (Daicel Chiralcel OD-H, *n*-hexane/*i*-PrOH = 90/10, UV = 254 nm, flow rate = 1.0 mL/min)  $t_{\text{R}1} = 9.399$  min (major) and  $t_{\text{R}2} = 12.921$  min (minor), ee = 84%.  $[\alpha]_{\text{D}}^{25} = +58.0$  ( $c = 2.0$ ,  $\text{CHCl}_3$ ).

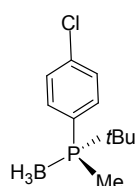

**(R)-tert-butyl(4-chlorophenyl)(methyl)phosphine Borane.** Performed according to the general procedure to afford 46 mg (68%) of (*R*)-**2j** as white solid.  $^1\text{H}$  NMR (400 MHz,  $\text{CDCl}_3$ ):  $\delta$  7.61 – 7.69 (m, 2 H, Ar), 7.41 – 7.48 (m, 2 H, Ar), 1.57 (d,  $J = 9.7$  Hz, 3 H,  $\text{CH}_3$ ), 1.10 (d,  $J = 14.1$  Hz, 9 H,  $\text{C}(\text{CH}_3)_3$ ), 0.11 – 0.95 (m, 3 H,  $\text{BH}_3$ ).  $^{13}\text{C}$  NMR (101 MHz,  $\text{CDCl}_3$ ):  $\delta$  137.8 (s, Ar), 134.2 (d,  $J_{\text{C-P}} = 8.9$  Hz, Ar), 128.6 (d,  $J_{\text{C-P}} = 9.9$  Hz, Ar), 126.6 (d,  $J_{\text{C-P}} = 50.5$  Hz, Ar), 28.6 (d,  $J_{\text{C-P}} = 30.3$  Hz,  $\text{C}(\text{CH}_3)_3$ ), 25.1 (d,  $J_{\text{C-P}} = 2.7$  Hz,  $\text{C}(\text{CH}_3)_3$ ), 5.3 (d,  $J_{\text{C-P}} = 38.4$  Hz,  $\text{CH}_3$ ).  $^{31}\text{P}$  NMR (162 MHz,  $\text{CDCl}_3$ ):  $\delta$  25.5 (q,  $J = 59.9$  Hz). HRMS (ESI):  $m/z$ :  $[\text{M}+\text{H}-\text{BH}_3]^+$  calculated for  $\text{C}_{11}\text{H}_{17}\text{ClP}$ : 215.0751, found 215.0752. HPLC (Daicel Chiralcel AS-H, *n*-hexane/*i*-PrOH = 99/1, UV = 234 nm, flow rate = 1.0 mL/min)  $t_{\text{R}1} = 9.339$  min (major) and  $t_{\text{R}2} = 11.765$  min (minor), ee = 94%.  $[\alpha]_{\text{D}}^{25} = +1.5$  ( $c = 2.0$ ,  $\text{CHCl}_3$ ).

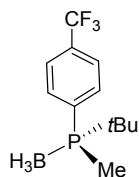

**(R)-tert-butyl(methyl)(4-(trifluoromethyl)phenyl)phosphine Borane.** Performed according to the general procedure to afford 47 mg (60%) of (*R*)-**2k** as yellow solid.  $^1\text{H}$  NMR (400 MHz,  $\text{CDCl}_3$ ):  $\delta$  7.83 - 7.88 (m, 2 H, Ar), 7.72 (d,  $J = 8.0$  Hz, 2 H, Ar), 1.61 (d,  $J = 9.5$  Hz, 3 H,  $\text{CH}_3$ ), 1.12 (d,  $J = 14.2$  Hz, 9 H,  $\text{C}(\text{CH}_3)_3$ ), 0.21 - 0.94 (m, 3 H,  $\text{BH}_3$ ).  $^{13}\text{C}$  NMR (101 MHz,  $\text{CDCl}_3$ ):  $\delta$  133.3 (d,  $J_{\text{C-P}} = 8.4$  Hz, Ar), 133.2 (d,  $J_{\text{C-F}} = 2.0$  Hz, Ar), 133.0 (d,  $J_{\text{C-F}} = 5.1$  Hz, Ar), 132.4 (s, Ar), 123.6 (q,  $J_{\text{C-F}} = 273.7$  Hz,  $\text{CF}_3$ ), 122.2 (s, Ar), 28.6 (d,  $J_{\text{C-P}} = 32.6$  Hz,  $\text{C}(\text{CH}_3)_3$ ), 25.1 (d,  $J_{\text{C-P}} = 2.6$  Hz,  $\text{C}(\text{CH}_3)_3$ ), 5.2 (d,  $J_{\text{C-P}} = 37.0$  Hz,  $\text{CH}_3$ ).  $^{31}\text{P}$  NMR (162 MHz,  $\text{CDCl}_3$ ):  $\delta$  26.9 (q,  $J = 40.5$  Hz).  $^{19}\text{F}$  NMR (377 MHz,  $\text{CDCl}_3$ ):  $\delta$  -63.1 (s). HRMS (ESI):  $m/z$ :  $[\text{M}+\text{H}-\text{BH}_3]^+$  calculated for  $\text{C}_{12}\text{H}_{17}\text{F}_3\text{P}$ : 249.1014, found 249.1016. HPLC (Daicel Chiralcel AS-H, *n*-hexane/*i*-PrOH = 99/1, UV = 254 nm, flow rate = 1.0 mL/min)  $t_{\text{R}1} = 6.392$  min (minor) and  $t_{\text{R}2} = 6.672$  min (major), ee = 89%.  $[\alpha]_{\text{D}}^{25} = +5.5$  ( $c = 2.0$ ,  $\text{CHCl}_3$ ).

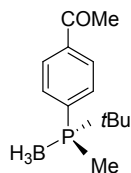

**(R)-1-(4-(borane tert-butyl(methyl)phosphino)phenyl)ethan-1-one.** Performed according to the general procedure to afford 20 mg (28%) of (*R*)-**2l** as white solid.  $^1\text{H}$  NMR (400 MHz,  $\text{CDCl}_3$ ):  $\delta$  7.95 - 8.05 (m, 2 H, Ar), 7.82 (t,  $J = 7.4$  Hz, 2 H, Ar), 2.64 (d,  $J = 2.8$  Hz, 3 H,  $\text{COCH}_3$ ), 1.61 (d,  $J = 6.8$  Hz, 3 H,  $\text{CH}_3$ ), 1.12 (d,  $J = 14.2$  Hz, 9 H,  $\text{C}(\text{CH}_3)_3$ ).  $^{13}\text{C}$  NMR (101 MHz,  $\text{CDCl}_3$ ):  $\delta$  197.6 (s,  $\text{COCH}_3$ ), 138.8 (s, Ar), 133.2 (d,  $J_{\text{C-P}} = 8.1$  Hz, Ar), 127.7 (d,  $J_{\text{C-P}} = 9.1$  Hz, Ar), 28.8 (d,  $J_{\text{C-P}} = 30.3$  Hz,  $\text{C}(\text{CH}_3)_3$ ), 28.5 (s,  $\text{COCH}_3$ ), 25.1 (d,  $J_{\text{C-P}} = 2.7$  Hz,  $\text{C}(\text{CH}_3)_3$ ), 5.2 (d,  $J_{\text{C-P}} = 38.4$  Hz,  $\text{CH}_3$ ).  $^{31}\text{P}$  NMR (162 MHz,  $\text{CDCl}_3$ ):  $\delta$  26.5 (q,  $J = 61.6$  Hz). HRMS (ESI):  $m/z$ :  $[\text{M}+\text{H}-\text{BH}_3]^+$  calculated for  $\text{C}_{13}\text{H}_{20}\text{OP}$ : 223.1246, found 223.1247. HPLC (Daicel Chiralcel OD-H, *n*-hexane/*i*-PrOH = 90/10, UV = 254 nm, flow rate = 1.0 mL/min)  $t_{\text{R}1} = 7.292$  min (major) and  $t_{\text{R}2} = 8.536$  min (minor), ee = 63%.  $[\alpha]_{\text{D}}^{25} = +1.5$  ( $c = 2.0$ ,  $\text{CHCl}_3$ ).

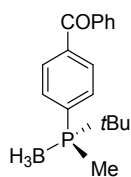

**(R)-(4-(borane tert-butyl(methyl)phosphino)phenyl)(phenyl)methanone.** Performed according to the general procedure to afford 22 mg (25%) of (*R*)-**2m** as yellow solid.  $^1\text{H}$  NMR (400 MHz,  $\text{CDCl}_3$ ):  $\delta$  7.77 - 7.90 (m, 6 H, Ar), 7.61 - 7.65 (m, 1 H, Ar), 7.49 - 7.53 (m, 2 H, Ar), 1.63 (d,  $J = 8.0$  Hz, 3 H,  $\text{CH}_3$ ), 1.14 (d,  $J = 12.0$  Hz, 9 H,  $\text{C}(\text{CH}_3)_3$ ), 0.11 - 1.02 (m, 3 H,  $\text{BH}_3$ ).  $^{13}\text{C}$  NMR (101 MHz,  $\text{CDCl}_3$ ):  $\delta$  196.1 (s, CO), 139.8 (s, Ar), 136.8 (s, Ar), 133.0 (s, Ar), 132.8 (d,  $J_{\text{C-P}} = 8.1$  Hz, Ar), 132.4 (s, Ar), 131.6 (s, Ar), 130.2 (s, Ar), 129.4 (d,  $J_{\text{C-P}} = 10.0$  Hz, Ar), 128.5 (s, Ar), 126.5 (s, Ar), 28.7 (d,  $J_{\text{C-P}} = 32.3$  Hz,  $\text{C}(\text{CH}_3)_3$ ), 25.2 (d,  $J_{\text{C-P}} = 2.7$  Hz,  $\text{C}(\text{CH}_3)_3$ ), 5.2 (d,  $J_{\text{C-P}} = 37.4$  Hz,  $\text{CH}_3$ ).  $^{31}\text{P}$  NMR (162 MHz,  $\text{CDCl}_3$ ):  $\delta$  26.5 (q,  $J = 76.1$  Hz). HRMS (ESI):  $m/z$ :  $[\text{M}+\text{H}-\text{BH}_3]^+$  calculated for  $\text{C}_{18}\text{H}_{22}\text{P}$ : 285.1408, found 285.1413. HPLC (Daicel Chiralcel OD-H, *n*-hexane/*i*-PrOH = 98/2, UV = 250 nm, flow rate = 1.0 mL/min)  $t_{\text{R}1} = 54.504$  min (minor) and  $t_{\text{R}2} = 57.362$  min (major), ee = 65%.  $[\alpha]_{\text{D}}^{25} = +52.0$  ( $c = 2.0$ ,  $\text{CHCl}_3$ ).

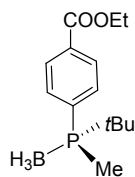

**(R)-ethyl 4-(borane *tert*-butyl(methyl)phosphino)benzoate.** Performed according to the general procedure to afford 50 mg (63%) of (*R*)-**2n** as yellow solid.  $^1\text{H}$  NMR (400 MHz,  $\text{CDCl}_3$ ):  $\delta$  8.08 – 8.14 (m, 2 H, Ar), 7.76 – 7.83 (m, 2 H, Ar), 4.41 (q,  $J = 7.0$  Hz, 2 H,  $\text{CH}_2\text{CH}_3$ ), 1.61 (d,  $J = 9.8$  Hz, 3 H,  $\text{CH}_2\text{CH}_3$ ), 1.41 (t,  $J = 7.0$  Hz, 3 H,  $\text{CH}_3$ ), 1.11 (d,  $J = 14.0$  Hz, 9 H,  $\text{C}(\text{CH}_3)_3$ ), 0.19 – 0.94 (m, 3 H,  $\text{BH}_3$ ).  $^{13}\text{C}$  NMR (101 MHz,  $\text{CDCl}_3$ ):  $\delta$  165.9 (s,  $\text{CO}_2\text{Et}$ ), 133.4 (d,  $J_{\text{C-P}} = 2.0$  Hz, Ar), 132.9 (d,  $J_{\text{C-P}} = 8.3$  Hz, Ar), 132.8 (d,  $J_{\text{C-P}} = 2.0$  Hz, Ar), 129.1 (d,  $J_{\text{C-P}} = 9.5$  Hz, Ar), 61.4 (s,  $\text{CO}_2\text{CH}_2\text{CH}_3$ ), 28.7 (d,  $J_{\text{C-P}} = 33.3$  Hz,  $\text{C}(\text{CH}_3)_3$ ), 25.1 (d,  $J_{\text{C-P}} = 2.8$  Hz,  $\text{C}(\text{CH}_3)_3$ ), 14.3 (s,  $\text{CO}_2\text{CH}_2\text{CH}_3$ ), 5.2 (d,  $J_{\text{C-P}} = 37.4$  Hz,  $\text{CH}_3$ ).  $^{31}\text{P}$  NMR (162 MHz,  $\text{CDCl}_3$ ):  $\delta$  26.4 (q,  $J = 66.4$  Hz). HRMS (ESI):  $m/z$ :  $[\text{M}+\text{H}-\text{BH}_3]^+$  calculated for  $\text{C}_{14}\text{H}_{22}\text{O}_2\text{P}$ : 253.1352, found 253.1353. HPLC (Daicel Chiralcel OD-H, *n*-hexane/*i*-PrOH = 98/2, UV = 230 nm, flow rate = 0.8 mL/min)  $t_{\text{R}1} = 15.308$  min (major) and  $t_{\text{R}2} = 16.976$  min (minor), ee = 92%.  $[\alpha]_{\text{D}}^{25} = +11.0$  ( $c = 2.0$ ,  $\text{CHCl}_3$ ).

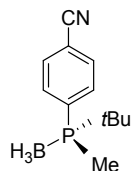

**(R)-4-( borane *tert*-butyl(methyl)phosphino)benzonitrile.** Performed according to the general procedure to afford 24 mg (36%) of (*R*)-**2o** as white solid.  $^1\text{H}$  NMR (400 MHz,  $\text{CDCl}_3$ ):  $\delta$  7.85 (d,  $J = 6.0$  Hz, 2 H, Ar), 7.77 (d,  $J = 5.0$  Hz, 2 H, Ar), 1.63 (d,  $J = 7.0$  Hz, 3 H,  $\text{CH}_3$ ), 0.98 – 1.19 (d,  $J = 14.0$  Hz, 9 H,  $\text{C}(\text{CH}_3)_3$ ), 0.11 – 0.95 (m, 3 H,  $\text{BH}_3$ ).  $^{13}\text{C}$  NMR (101 MHz,  $\text{CDCl}_3$ ):  $\delta$  134.3 (d,  $J_{\text{C-P}} = 44.4$  Hz, Ar), 133.5 (d,  $J_{\text{C-P}} = 7.1$  Hz, Ar), 131.7 (d,  $J_{\text{C-P}} = 8.1$  Hz, Ar), 117.9 (s, CN), 115.0 (d,  $J_{\text{C-P}} = 40.0$  Hz, Ar), 28.6 (d,  $J_{\text{C-P}} = 30.3$  Hz,  $\text{C}(\text{CH}_3)_3$ ), 25.1 (d,  $J_{\text{C-P}} = 2.7$  Hz,  $\text{C}(\text{CH}_3)_3$ ), 5.1 (d,  $J_{\text{C-P}} = 40.4$  Hz,  $\text{CH}_3$ ).  $^{31}\text{P}$  NMR (162 MHz,  $\text{CDCl}_3$ ):  $\delta$  28.1 (q,  $J = 71.3$  Hz). HRMS (ESI):  $m/z$ :  $[\text{M}+\text{H}-\text{BH}_3]^+$  calculated for  $\text{C}_{12}\text{H}_{17}\text{NP}$ : 206.1093, found 206.1094. HPLC (Daicel Chiralcel OD-H, *n*-hexane/*i*-PrOH = 90/10, UV = 250 nm, flow rate = 1.0 mL/min)  $t_{\text{R}1} = 7.383$  min (major) and  $t_{\text{R}2} = 8.712$  min (minor), ee = 74%.  $[\alpha]_{\text{D}}^{25} = +4.7$  ( $c = 2.0$ ,  $\text{CHCl}_3$ ).

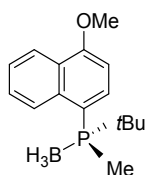

**(R)-*tert*-butyl(4-methoxynaphthalen-1-yl)(methyl)phosphine Borane.** Performed according to the general procedure to afford 37 mg (40%) of (*R*)-**2p** as white solid.  $^1\text{H}$  NMR (400 MHz,  $\text{CDCl}_3$ ):  $\delta$  8.79 (d,  $J = 8.4$  Hz, 1 H, Ar), 8.33 (d,  $J = 8.4$  Hz, 1 H, Ar), 7.74 (s, 1 H, Ar), 7.47 - 7.63 (m, 2 H, Ar), 6.86 (d,  $J = 8.2$  Hz, 1 H, Ar), 4.05 (s, 3 H,  $\text{OCH}_3$ ), 1.76 (d,  $J = 9.0$  Hz, 3H,  $\text{CH}_3$ ), 1.15 (d,  $J = 14.0$  Hz, 9 H,  $\text{C}(\text{CH}_3)_3$ ), 0.21 - 0.88 (m, 3 H,  $\text{BH}_3$ ).  $^{13}\text{C}$  NMR (101 MHz,  $\text{CDCl}_3$ ):  $\delta$  158.4 (d,  $J_{\text{C-P}} = 3.0$  Hz, Ar), 136.4 (d,  $J_{\text{C-P}} = 11.1$  Hz, Ar), 134.7 (d,  $J_{\text{C-P}} = 6.1$  Hz, Ar), 127.9 (d,  $J_{\text{C-P}} = 5.1$  Hz, Ar), 127.1 (s, Ar), 126.0 (d,  $J_{\text{C-P}} = 8.1$  Hz, Ar), 125.6 (s, Ar), 122.4 (s, Ar), 115.7 (d,  $J_{\text{C-P}} = 49.5$  Hz, Ar), 102.7 (d,  $J_{\text{C-P}} = 11.1$  Hz, Ar), 55.7 (s,  $\text{OMe}$ ), 30.7 (d,  $J_{\text{C-P}} = 32.3$  Hz,  $\text{C}(\text{CH}_3)_3$ ), 25.9 (d,  $J_{\text{C-P}} = 3.0$  Hz,  $\text{C}(\text{CH}_3)_3$ ), 9.0 (d,  $J_{\text{C-P}} = 39.4$  Hz,  $\text{CH}_3$ ).  $^{31}\text{P}$  NMR (162 MHz,  $\text{CDCl}_3$ ):  $\delta$  22.4 (q,  $J = 68.0$  Hz). HRMS (ESI):  $m/z$ :  $[\text{M}+\text{H}-\text{BH}_3]^+$  calculated for  $\text{C}_{16}\text{H}_{22}\text{OP}$ : 261.1403, found 261.1403. HPLC (Daicel Chiralcel OD-H, *n*-hexane/*i*-PrOH = 98/2, UV = 250 nm, flow rate = 1 mL/min)  $t_{\text{R}1} = 7.585$  min (minor) and  $t_{\text{R}2} = 12.549$  min (major), ee = 46%.  $[\alpha]_{\text{D}}^{25} = +16.0$  ( $c = 2.0$ ,  $\text{CHCl}_3$ ).

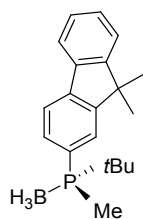

**(R)-tert-butyl(9,9-dimethyl-9H-fluoren-2-yl)(methyl)phosphine Borane.** Performed according to the general procedure to afford 76 mg (82%) of (*R*)-**2q** as white solid.  $^1\text{H}$  NMR (400 MHz,  $\text{CDCl}_3$ ):  $\delta$  7.72 – 7.81 (m, 3 H, Ar), 7.67 (t,  $J$  = 8.6 Hz, 1 H, Ar), 7.43 – 7.49 (m, 1 H, Ar), 7.34 – 7.38 (m, 2 H, Ar), 1.62 (t,  $J$  = 7.6 Hz, 3 H,  $\text{CH}_3$ ), 1.51 (d,  $J$  = 4.0 Hz, 6 H,  $\text{CH}_3$ ), 1.12 (d,  $J$  = 16.0 Hz, 9 H,  $\text{C}(\text{CH}_3)_3$ ), 0.11 – 0.99 (m, 3 H,  $\text{BH}_3$ ).  $^{13}\text{C}$  NMR (101 MHz,  $\text{CDCl}_3$ ):  $\delta$  154.1 (s, Ar), 153.5 (d,  $J_{\text{C-P}}$  = 9.1 Hz, Ar), 142.2 (s, Ar), 138.0 (d,  $J_{\text{C-P}}$  = 10.0 Hz, Ar), 131.8 (s, Ar), 131.7 (d,  $J_{\text{C-P}}$  = 5.0 Hz, Ar), 128.4 (s, Ar), 127.2 (d,  $J_{\text{C-P}}$  = 8.1 Hz, Ar), 126.0 (s, Ar), 122.8 (s, Ar), 120.7 (s, Ar), 119.7 (d,  $J_{\text{C-P}}$  = 10.0 Hz, Ar), 47.0 (s,  $\text{C}(\text{CH}_3)_2$ ), 28.6 (d,  $J_{\text{C-P}}$  = 34.4 Hz,  $\text{C}(\text{CH}_3)_3$ ), 27.0 (s,  $\text{C}(\text{CH}_3)_2$ ), 25.2 (d,  $J_{\text{C-P}}$  = 2.8 Hz,  $\text{C}(\text{CH}_3)_3$ ), 5.5 (d,  $J_{\text{C-P}}$  = 38.4 Hz,  $\text{CH}_3$ ).  $^{31}\text{P}$  NMR (162 MHz,  $\text{CDCl}_3$ ):  $\delta$  25.3 (q,  $J$  = 72.9 Hz). HRMS (ESI):  $m/z$ :  $[\text{M}+\text{H}-\text{BH}_3]^+$  calculated for  $\text{C}_{20}\text{H}_{26}\text{P}$ : 297.1767, found 297.1769. HPLC (Daicel Chiralcel IBN-H, *n*-hexane/*i*-PrOH = 99/1, UV = 254 nm, flow rate = 0.5 mL/min)  $t_{\text{R}1}$  = 11.612 min (minor) and  $t_{\text{R}2}$  = 12.325 min (major), ee = 74%.  $[\alpha]_{\text{D}}^{25}$  = +7.5 (c = 2.0,  $\text{CHCl}_3$ ).

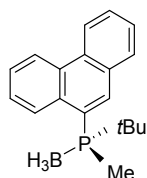

**(R)-tert-butyl(methyl)(phenanthren-9-yl)phosphine Borane.** Performed according to the general procedure to afford 79 mg (85%) of (*R*)-**2r** as white solid.  $^1\text{H}$  NMR (400 MHz,  $\text{CDCl}_3$ ):  $\delta$  8.96 (d,  $J$  = 8.1 Hz, 1 H, Ar), 8.68 – 8.74 (m, 2 H, Ar), 8.08 (d,  $J$  = 12.4 Hz, 1 H, Ar), 7.94 (d,  $J$  = 7.7 Hz, 1 H, Ar), 7.61 – 7.80 (m, 4 H, Ar), 1.87 (d,  $J$  = 9.0 Hz, 3 H,  $\text{CH}_3$ ), 1.21 (d,  $J$  = 14.1 Hz, 9 H,  $\text{C}(\text{CH}_3)_3$ ), 0.11 - 0.94 (m, 3 H,  $\text{BH}_3$ ).  $^{13}\text{C}$  NMR (101 MHz,  $\text{CDCl}_3$ ):  $\delta$  136.2 (d,  $J_{\text{C-P}}$  = 4.0 Hz, Ar), 132.7 (d,  $J_{\text{C-P}}$  = 7.1 Hz, Ar), 131.7 (d,  $J_{\text{C-P}}$  = 2.0 Hz, Ar), 130.6 (d,  $J_{\text{C-P}}$  = 7.1 Hz, Ar), 130.0 (d,  $J_{\text{C-P}}$  = 10.0 Hz, Ar), 129.5 (s, Ar), 129.4 (d,  $J_{\text{C-P}}$  = 17.2 Hz, Ar), 128.8 (s, Ar), 127.1 (d,  $J_{\text{C-P}}$  = 6.1 Hz, Ar), 126.6 (s, Ar), 124.3 (d,  $J_{\text{C-P}}$  = 47.5 Hz, Ar), 122.8 (d,  $J_{\text{C-P}}$  = 38.4 Hz, Ar), 30.7 (d,  $J_{\text{C-P}}$  = 30.3 Hz,  $\text{C}(\text{CH}_3)_3$ ), 26.1 (d,  $J_{\text{C-P}}$  = 2.8 Hz,  $\text{C}(\text{CH}_3)_3$ ), 9.2 (d,  $J_{\text{C-P}}$  = 40.4 Hz,  $\text{CH}_3$ ).  $^{31}\text{P}$  NMR (162 MHz,  $\text{CDCl}_3$ ):  $\delta$  24.6 (q,  $J$  = 58.3 Hz). HRMS (ESI):  $m/z$ :  $[\text{M}+\text{H}-\text{BH}_3]^+$  calculated for  $\text{C}_{19}\text{H}_{22}\text{P}$ : 281.1454, found 281.1455. HPLC (Daicel Chiralcel AS-H, *n*-hexane/*i*-PrOH = 90/10, UV = 254 nm, flow rate = 1.0 mL/min)  $t_{\text{R}1}$  = 13.414 min (minor) and  $t_{\text{R}2}$  = 28.472 min (major), ee = 91%.  $[\alpha]_{\text{D}}^{25}$  = +13.5 (c = 2.0,  $\text{CHCl}_3$ ).

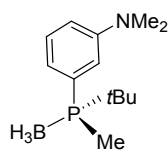

**(R)-3-(borane tert-butyl(methyl)phosphino)-N,N-dimethylaniline.** Performed according to the general procedure to afford 37 mg (52%) of (*R*)-**3a** as yellow solid.  $^1\text{H}$  NMR (400 MHz,  $\text{CDCl}_3$ ):  $\delta$  7.26 – 7.39 (m, 1 H, Ar), 7.09 (d,  $J$  = 12.0 Hz, 1 H, Ar), 6.92 – 6.96 (m, 1 H, Ar), 6.82 (d,  $J$  = 8.0 Hz, 1 H, Ar), 2.98 (s, 6 H,  $\text{N}(\text{CH}_3)_2$ ), 1.54 (d,  $J$  = 12.0 Hz, 3 H,  $\text{CH}_3$ ), 1.12 (d,  $J$  = 24.0 Hz, 9 H,  $\text{C}(\text{CH}_3)_3$ ), 0.18 – 0.74 (m, 3 H,  $\text{BH}_3$ ).  $^{13}\text{C}$  NMR (101 MHz,  $\text{CDCl}_3$ ):  $\delta$  150.1 (d,  $J_{\text{C-P}}$  = 11.8 Hz, Ar), 128.8 (d,  $J_{\text{C-P}}$  = 10.3 Hz, Ar), 127.3 (d,  $J_{\text{C-P}}$  = 51.5 Hz, Ar), 120.1 (d,  $J_{\text{C-P}}$  = 6.0 Hz, Ar), 117.2 (d,  $J_{\text{C-P}}$  = 12.8 Hz, Ar), 114.8 (d,  $J_{\text{C-P}}$  = 2.3 Hz, Ar), 40.4 (s,  $\text{N}(\text{CH}_3)_2$ ), 28.5 (d,  $J_{\text{C-P}}$  = 30.3 Hz,  $\text{C}(\text{CH}_3)_3$ ), 25.4 (d,  $J_{\text{C-P}}$  = 2.7 Hz,  $\text{C}(\text{CH}_3)_3$ ), 5.4 (d,  $J_{\text{C-P}}$  = 38.4 Hz,  $\text{CH}_3$ ).  $^{31}\text{P}$  NMR (162 MHz,  $\text{CDCl}_3$ ):  $\delta$  25.6 (q,  $J$  = 64.8 Hz). HRMS (ESI):  $m/z$ :  $[\text{M}+\text{H}-\text{BH}_3]^+$  calculated for  $\text{C}_{13}\text{H}_{23}\text{NP}$ : 224.1563, found 224.1562. HPLC (Daicel Chiralcel OD-H, *n*-hexane/*i*-PrOH = 98/2,



UV = 250 nm, flow rate = 0.8 mL/min  $t_{R1}$  = 8.667 min (minor) and  $t_{R2}$  = 10.155 min (major), ee = 80%.  $[\alpha]_D^{25}$  = +24.0 (c = 2.0, CHCl<sub>3</sub>).

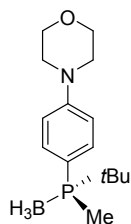

**(R)-4-(4-(borane tert-butyl(methyl)phosphino)phenyl)morpholine.** Performed according to the general procedure to afford 44 mg (53%) of (*R*)-**3b** as white solid. <sup>1</sup>H NMR (400 MHz, CDCl<sub>3</sub>): δ 7.55 – 7.60 (m, 2 H, Ar), 6.91 – 6.94 (m, 2 H, Ar), 3.84 – 3.87 (m, 4 H, CH<sub>2</sub>), 3.23 – 3.25 (m, 4 H, CH<sub>2</sub>), 1.52 (d, *J* = 9.7 Hz, 3 H, CH<sub>3</sub>), 1.09 (d, *J* = 13.9 Hz, 9 H, C(CH<sub>3</sub>)<sub>3</sub>), 0.25 – 0.84 (m, 3 H, BH<sub>3</sub>). <sup>13</sup>C NMR (101 MHz, CDCl<sub>3</sub>): δ 152.8 (d, *J*<sub>C-P</sub> = 3.0 Hz, Ar), 134.1 (d, *J*<sub>C-P</sub> = 9.1 Hz, Ar), 116.0 (d, *J*<sub>C-P</sub> = 56.6 Hz, Ar), 114.1 (d, *J*<sub>C-P</sub> = 10.1 Hz, Ar), 66.6 (s, CH<sub>2</sub>), 47.8 (s, CH<sub>2</sub>), 28.7 (d, *J*<sub>C-P</sub> = 34.3 Hz, C(CH<sub>3</sub>)<sub>3</sub>), 25.1 (d, *J*<sub>C-P</sub> = 3.0 Hz, C(CH<sub>3</sub>)<sub>3</sub>), 5.3 (d, *J*<sub>C-P</sub> = 38.4 Hz, CH<sub>3</sub>). <sup>31</sup>P NMR (162 MHz, CDCl<sub>3</sub>): δ 22.4 (q, *J* = 74.5 Hz). HRMS (ESI): *m/z*: [M+H-BH<sub>3</sub>]<sup>+</sup> calculated for C<sub>15</sub>H<sub>25</sub>NOP: 266.1668, found 266.1668. HPLC (Daicel Chiralcel OD-H, *n*-hexane/*i*-PrOH = 90/10, UV = 250 nm, flow rate = 1.0 mL/min)  $t_{R1}$  = 11.953 min (major) and  $t_{R2}$  = 16.618 min (minor), ee = 46%.  $[\alpha]_D^{25}$  = +24.0 (c = 2.0, CHCl<sub>3</sub>).

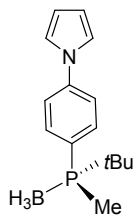

**(R)-1-(4-(borane tert-butyl(methyl)phosphino)phenyl)-1H-pyrrole.** Performed according to the general procedure to afford 57 mg (74%) of (*R*)-**3c** as white solid. <sup>1</sup>H NMR (400 MHz, CDCl<sub>3</sub>): δ 7.74 – 7.79 (m, 2 H, Ar), 7.46 – 7.49 (m, 2 H, Ar), 7.13 – 7.15 (m, 2 H, Ar), 6.38 – 6.39 (m, 2 H, Ar), 1.59 (d, *J* = 3.0 Hz, 3 H, CH<sub>3</sub>), 1.13 (d, *J* = 4.0 Hz, 9 H, C(CH<sub>3</sub>)<sub>3</sub>), 0.11 – 1.07 (m, 3 H, BH<sub>3</sub>). <sup>13</sup>C NMR (101 MHz, CDCl<sub>3</sub>): δ 142.7 (d, *J*<sub>C-P</sub> = 3.0 Hz, Ar), 134.4 (d, *J*<sub>C-P</sub> = 9.9 Hz, Ar), 124.2 (d, *J*<sub>C-P</sub> = 51.2 Hz, Ar), 119.5 (d, *J*<sub>C-P</sub> = 10.0 Hz, Ar), 119.0 (s, Ar), 111.4 (s, Ar), 28.7 (d, *J*<sub>C-P</sub> = 33.3 Hz, C(CH<sub>3</sub>)<sub>3</sub>), 25.1 (d, *J*<sub>C-P</sub> = 3.0 Hz, C(CH<sub>3</sub>)<sub>3</sub>), 5.3 (d, *J*<sub>C-P</sub> = 37.4 Hz, CH<sub>3</sub>). <sup>31</sup>P NMR (162 MHz, CDCl<sub>3</sub>): δ 24.6 (q, *J* = 68.0 Hz). HRMS (ESI): *m/z*: [M+H-BH<sub>3</sub>]<sup>+</sup> calculated for C<sub>15</sub>H<sub>21</sub>NP: 246.1406, found 246.1407. HPLC (Daicel Chiralcel OD-H, *n*-hexane/*i*-PrOH = 98/2, UV = 254 nm, flow rate = 0.8 mL/min)  $t_{R1}$  = 13.659 min (minor) and  $t_{R2}$  = 15.300 min (major), ee = 94%.  $[\alpha]_D^{25}$  = +0.5 (c = 2.0, CHCl<sub>3</sub>).

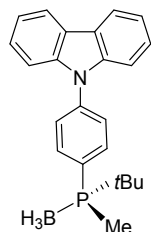

**(R)-9-(4-(borane tert-butyl(methyl)phosphino)phenyl)-9H-carbazole.** Performed according to the general procedure to afford 67.8 mg (63%) of (*R*)-**3d** as white solid. <sup>1</sup>H NMR (400 MHz, CDCl<sub>3</sub>): δ 8.15 (d, *J* = 8.0 Hz, 2 H, Ar), 7.93 – 7.98 (m, 2 H, Ar), 7.70 – 7.72 (m, 2 H, Ar), 7.41 – 7.49 (m, 4 H, Ar), 7.30 – 7.34 (m, 2 H, Ar), 1.67 (d, *J* = 8.0 Hz, 3 H, CH<sub>3</sub>), 1.21 (d, *J* = 16.0 Hz, 9 H, C(CH<sub>3</sub>)<sub>3</sub>), 0.26 – 0.93 (m, 3 H, BH<sub>3</sub>). <sup>13</sup>C NMR (101 MHz, CDCl<sub>3</sub>): δ 140.5 (d, *J*<sub>C-P</sub> = 2.0 Hz, Ar), 140.2 (s, Ar), 134.5 (d, *J*<sub>C-P</sub> = 9.1 Hz, Ar), 126.7 (s, Ar), 126.3 (d, *J*<sub>C-P</sub> = 10.0 Hz, Ar), 126.1 (s, Ar), 123.7 (s, Ar), 120.5 (d, *J*<sub>C-P</sub> = 6.1 Hz, Ar), 109.7 (s, Ar), 28.7 (d, *J*<sub>C-P</sub> = 33.3 Hz, C(CH<sub>3</sub>)<sub>3</sub>), 25.2 (d, *J*<sub>C-P</sub> = 3.0 Hz, C(CH<sub>3</sub>)<sub>3</sub>),

5.4 (d,  $J_{C-P} = 37.4$  Hz,  $CH_3$ ).  $^{31}P$  NMR (162 MHz,  $CDCl_3$ ):  $\delta$  25.6 (q,  $J = 53.5$  Hz). HRMS (ESI):  $m/z$ :  $[M+H-BH_3]^+$  calculated for  $C_{23}H_{25}NP$ : 346.1719, found 346.1721. HPLC (Daicel Chiralcel AS-H, *n*-hexane/*i*-PrOH = 98/2, UV = 254 nm, flow rate = 0.5 mL/min)  $t_{R1} = 18.239$  min (major) and  $t_{R2} = 20.275$  min (minor), ee = 69%.  $[\alpha]_D^{25} = +4.5$  (c = 2.0,  $CHCl_3$ ).

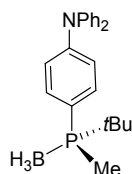

**(R)-4-(borane *tert*-butyl(methyl)phosphino)-*N,N*-diphenylaniline.** Performed according to the general procedure to afford 58 mg (47%) of (*R*)-**3e** as white solid.  $^1H$  NMR (400 MHz,  $CDCl_3$ ):  $\delta$  7.46 – 7.51 (m, 2 H, Ar), 7.28 – 7.32 (m, 4 H, Ar), 7.09 – 7.14 (m, 6 H, Ar), 7.02 – 7.04 (m, 2 H, Ar), 1.52 (d,  $J = 8.0$  Hz, 3 H,  $CH_3$ ), 1.11 (d,  $J = 12.0$  Hz, 9 H,  $C(CH_3)_3$ ), 0.26 – 0.86 (m, 3 H,  $BH_3$ ).  $^{13}C$  NMR (101 MHz,  $CDCl_3$ ):  $\delta$  150.3 (d,  $J_{C-P} = 2.0$  Hz, Ar), 146.7 (s, Ar), 133.8 (d,  $J_{C-P} = 9.1$  Hz, Ar), 125.6 (s, Ar), 124.2 (s, Ar), 120.4 (d,  $J_{C-P} = 10.0$  Hz, Ar), 118.4 (s, Ar), 117.8 (s, Ar), 28.7 (d,  $J_{C-P} = 33.3$  Hz,  $C(CH_3)_3$ ), 25.2 (d,  $J_{C-P} = 3.0$  Hz,  $C(CH_3)_3$ ), 5.4 (d,  $J_{C-P} = 38.4$  Hz,  $CH_3$ ).  $^{31}P$  NMR (162 MHz,  $CDCl_3$ ):  $\delta$  25.4 (q,  $J = 61.6$  Hz). HRMS (ESI):  $m/z$ :  $[M+H-BH_3]^+$  calculated for  $C_{23}H_{27}NP$ : 348.1876, found 348.1877. HPLC (Daicel Chiralcel OD-H, *n*-hexane/*i*-PrOH = 98/2, UV = 250 nm, flow rate = 1.0 mL/min)  $t_{R1} = 5.476$  min (minor) and  $t_{R2} = 5.912$  min (major), ee = 84%.  $[\alpha]_D^{25} = +8.0$  (c = 2.0,  $CHCl_3$ ).

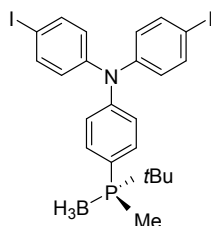

**(R)-4-(borane *tert*-butyl(methyl)phosphino)-*N,N*-bis(4-iodophenyl)aniline.** Performed according to the general procedure to afford 93.7 mg (51%) of (*R*)-**3f** as white solid.  $^1H$  NMR (400 MHz,  $CDCl_3$ ):  $\delta$  7.46 – 7.51 (m, 2 H, Ar), 7.28 – 7.32 (m, 4 H, Ar), 7.13 (d,  $J = 8.0$  Hz, 4 H, Ar), 7.02 – 7.04 (m, 2 H, Ar), 1.52 (d,  $J = 8.0$  Hz, 3 H,  $CH_3$ ), 1.12 (d,  $J = 12.0$  Hz, 9 H,  $C(CH_3)_3$ ), 0.26 – 0.86 (m, 3 H,  $BH_3$ ).  $^{13}C$  NMR (101 MHz,  $CDCl_3$ ):  $\delta$  149.2 (d,  $J_{C-P} = 3.0$  Hz, Ar), 146.1 (s, Ar), 138.6 (s, Ar), 134.0 (d,  $J_{C-P} = 9.1$  Hz, Ar), 127.7 (d,  $J_{C-P} = 39.9$  Hz, Ar), 121.6 (d,  $J_{C-P} = 10.1$  Hz, Ar), 120.5 (s, Ar), 87.6 (s, Ar), 28.6 (d,  $J_{C-P} = 33.3$  Hz,  $C(CH_3)_3$ ), 25.2 (d,  $J_{C-P} = 2.0$  Hz,  $C(CH_3)_3$ ), 5.3 (d,  $J_{C-P} = 38.4$  Hz,  $CH_3$ ).  $^{31}P$  NMR (162 MHz,  $CDCl_3$ ):  $\delta$  23.7 (q,  $J = 38.9$  Hz). HRMS (ESI):  $m/z$ :  $[M+H-BH_3]^+$  calculated for  $C_{23}H_{25}I_2NP$ : 599.9808, found 599.9811. HPLC (Daicel Chiralcel OD-H, *n*-hexane/*i*-PrOH = 90/10, UV = 254 nm, flow rate = 1.0 mL/min)  $t_{R1} = 9.428$  min (major) and  $t_{R2} = 11.065$  min (minor), ee = 94%.  $[\alpha]_D^{25} = +1.5$  (c = 2.0,  $CHCl_3$ ).

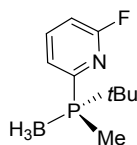

**(R)-2-(borane *tert*-butyl(methyl)phosphino)-6-fluoropyridine.** Performed according to the general procedure to afford 59 mg (62%) of (*R*)-**3g** as white solid.  $^1H$  NMR (400 MHz,  $CDCl_3$ ):  $\delta$  7.88 – 7.92 (m, 1 H, Ar), 7.69 – 7.73 (m, 1 H, Ar), 7.37 (d,  $J = 8.0$  Hz, 1 H, Ar), 1.60 (d,  $J = 8.0$  Hz, 3 H,  $CH_3$ ), 1.11 (d,  $J = 16.0$  Hz, 9 H,  $C(CH_3)_3$ ), 0.26 – 0.98 (m, 3 H,  $BH_3$ ).  $^{13}C$  NMR (101 MHz,  $CDCl_3$ ):  $\delta$  154.5 (d,  $J_{C-P} = 61.6$  Hz, Ar), 151.5 (d,  $J_{C-P} = 11.1$  Hz, Ar), 138.4 (d,  $J_{C-P} = 10.0$  Hz, Ar), 129.1 (d,  $J_{C-P} = 23.2$  Hz, Ar), 125.7 (d,  $J_{C-P} = 2.0$  Hz, Ar), 28.8 (d,  $J_{C-P} = 32.3$  Hz,  $C(CH_3)_3$ ), 25.2 (d,  $J_{C-P} = 3.0$  Hz,  $C(CH_3)_3$ ), 4.5 (d,  $J_{C-P} = 39.4$  Hz,  $CH_3$ ).  $^{31}P$  NMR (162 MHz,  $CDCl_3$ ):  $\delta$  30.3 (q,  $J = 61.6$  Hz).  $^{19}F$  NMR (376 MHz,  $CDCl_3$ ):  $\delta$  -68.4 (s). HRMS (ESI):  $m/z$ :  $[M+H-BH_3]^+$  calculated for  $C_{10}H_{16}FNP$ : 200.0999, found 200.1001. HPLC (Daicel

Chiralcel AS-H, *n*-hexane/*i*-PrOH = 98/2, UV = 250 nm, flow rate = 1.0 mL/min)  $t_{R1}$  = 11.503 min (minor) and  $t_{R2}$  = 12.124 min (major), ee = 97%.  $[\alpha]_D^{25}$  = +12.0 (c = 2.0, CHCl<sub>3</sub>).

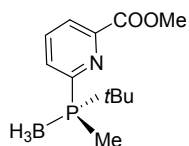

**(R)-methyl 6-(borane *tert*-butyl(methyl)phosphino)picolinate.** Performed according to the general procedure to afford 35.7 mg (47%) of (*R*)-**3h** as white solid. <sup>1</sup>H NMR (400 MHz, CDCl<sub>3</sub>): δ 8.11 – 8.15 (m, 2 H, Ar), 7.86 – 7.91 (m, 1 H, Ar), 3.97 (s, 3 H, CH<sub>3</sub>), 1.66 (d, *J* = 8.0 Hz, 3 H, CH<sub>3</sub>), 1.13 (d, *J* = 16.0 Hz, 9 H, C(CH<sub>3</sub>)<sub>3</sub>), 0.20 – 0.95 (m, 3 H, BH<sub>3</sub>). <sup>13</sup>C NMR (101 MHz, CDCl<sub>3</sub>): δ 165.2 (s, CO), 154.3 (d, *J*<sub>C-P</sub> = 64.6 Hz, Ar), 148.1 (d, *J*<sub>C-P</sub> = 11.1 Hz, Ar), 136.7 (d, *J*<sub>C-P</sub> = 8.1 Hz, Ar), 132.9 (d, *J*<sub>C-P</sub> = 25.3 Hz, Ar), 125.8 (d, *J*<sub>C-P</sub> = 2.0 Hz, Ar), 52.8 (s, CH<sub>3</sub>), 28.8 (d, *J*<sub>C-P</sub> = 32.3 Hz, C(CH<sub>3</sub>)<sub>3</sub>), 25.3 (d, *J*<sub>C-P</sub> = 2.5 Hz, C(CH<sub>3</sub>)<sub>3</sub>), 4.6 (d, *J*<sub>C-P</sub> = 39.4 Hz, CH<sub>3</sub>). <sup>31</sup>P NMR (162 MHz, CDCl<sub>3</sub>): δ 30.3 (q, *J* = 66.4 Hz). HRMS (ESI): *m/z*: [M+H-BH<sub>3</sub>]<sup>+</sup> calculated for C<sub>12</sub>H<sub>19</sub>NO<sub>2</sub>P: 240.1148, found 240.1150. HPLC (Daicel Chiralcel AS-H, *n*-hexane/*i*-PrOH = 95/5, UV = 230 nm, flow rate = 1.0 mL/min)  $t_{R1}$  = 8.140 min (minor) and  $t_{R2}$  = 9.308 min (major), ee = 73%.  $[\alpha]_D^{25}$  = +42.0 (c = 2.0, CHCl<sub>3</sub>).

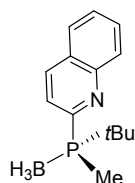

**(R)-2-(borane *tert*-butyl(methyl)phosphino)quinoline.** Performed according to the general procedure to afford 68 mg (56%) of (*R*)-**3i** as white solid. <sup>1</sup>H NMR (400 MHz, CDCl<sub>3</sub>): δ 8.20 – 8.22 (m, 1 H, Ar), 8.15 (d, *J* = 8.0 Hz, 1 H, Ar), 8.02 – 8.05 (m, 1 H, Ar), 7.87 (d, *J* = 8.0 Hz, 1 H, Ar), 7.75 – 7.79 (m, 1 H, Ar), 7.60 – 7.64 (m, 1 H, Ar), 1.76 (d, *J* = 8.0 Hz, 3 H, CH<sub>3</sub>), 1.18 (d, *J* = 16.0 Hz, 9 H, C(CH<sub>3</sub>)<sub>3</sub>), 0.25 – 1.11 (m, 3 H, BH<sub>3</sub>). <sup>13</sup>C NMR (101 MHz, CDCl<sub>3</sub>): δ 154.7 (s, Ar), 154.1 (s, Ar), 148.0 (d, *J*<sub>C-P</sub> = 13.1 Hz, Ar), 135.1 (d, *J*<sub>C-P</sub> = 10.0 Hz, Ar), 130.1 (s, Ar), 129.9 (s, Ar), 127.9 (s, Ar), 127.8 (s, Ar), 125.6 (d, *J*<sub>C-P</sub> = 26.3 Hz, Ar), 29.1 (d, *J*<sub>C-P</sub> = 32.3 Hz, C(CH<sub>3</sub>)<sub>3</sub>), 25.4 (d, *J*<sub>C-P</sub> = 3.0 Hz, C(CH<sub>3</sub>)<sub>3</sub>), 4.6 (d, *J*<sub>C-P</sub> = 40.4 Hz, CH<sub>3</sub>). <sup>31</sup>P NMR (162 MHz, CDCl<sub>3</sub>): δ 30.1 (q, *J* = 63.2 Hz). HRMS (ESI): *m/z*: [M+H-BH<sub>3</sub>]<sup>+</sup> calculated for C<sub>14</sub>H<sub>19</sub>NP: 232.1250, found 232.1250. HPLC (Daicel Chiralcel AS-H, *n*-hexane/*i*-PrOH = 98/2, UV = 250 nm, flow rate = 0.8 mL/min)  $t_{R1}$  = 6.452 min (minor) and  $t_{R2}$  = 6.937 min (major), ee = 81%.  $[\alpha]_D^{25}$  = +49.5 (c = 2.0, CHCl<sub>3</sub>).

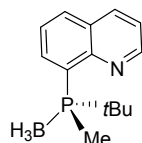

**(R)-8-(borane *tert*-butyl(methyl)phosphino)quinoline.** Performed according to the general procedure to afford 20.7 mg (20%) of (*R*)-**3j** as white solid. <sup>1</sup>H NMR (400 MHz, CDCl<sub>3</sub>): δ 8.91 – 8.93 (m, 1 H, Ar), 8.50 – 8.55 (m, 1 H, Ar), 8.19 (d, *J* = 8.0 Hz, 1 H, Ar), 7.96 (d, *J* = 8.0 Hz, 1 H, Ar), 7.57 – 7.64 (m, 1 H, Ar), 7.42 – 7.45 (m, 1 H, Ar), 2.10 (d, *J* = 8.0 Hz, 3 H, CH<sub>3</sub>), 1.18 (d, *J* = 12.0 Hz, 9 H, C(CH<sub>3</sub>)<sub>3</sub>), 0.26 – 0.90 (m, 3 H, BH<sub>3</sub>). <sup>13</sup>C NMR (101 MHz, CDCl<sub>3</sub>): δ 149.6 (d, *J*<sub>C-P</sub> = 2.0 Hz, Ar), 149.4 (s, Ar), 140.2 (d, *J*<sub>C-P</sub> = 16.2 Hz, Ar), 136.6 (s, Ar), 132.0 (d, *J*<sub>C-P</sub> = 2.5 Hz, Ar), 128.4 (d, *J*<sub>C-P</sub> = 5.1 Hz, Ar), 126.0 (s, Ar), 125.9 (s, Ar), 121.2 (s, Ar), 30.3 (d, *J*<sub>C-P</sub> = 34.3 Hz, C(CH<sub>3</sub>)<sub>3</sub>), 26.6 (d, *J*<sub>C-P</sub> = 3.0 Hz, C(CH<sub>3</sub>)<sub>3</sub>), 8.6 (d, *J*<sub>C-P</sub> = 39.4 Hz, CH<sub>3</sub>). <sup>31</sup>P NMR (162 MHz, CDCl<sub>3</sub>): δ 31.0 (q, *J* = 58.3 Hz). HRMS (ESI): *m/z*: [M+H-BH<sub>3</sub>]<sup>+</sup> calculated for C<sub>14</sub>H<sub>19</sub>NP: 232.1250, found 232.1250. HPLC (Daicel Chiralcel OD-H, *n*-hexane/*i*-PrOH = 98/2, UV = 250 nm, flow rate = 1.0 mL/min)  $t_{R1}$  = 6.324 min (minor) and  $t_{R2}$  = 7.473 min (major), ee = 71%.  $[\alpha]_D^{25}$  = +42.0 (c = 2.0, CHCl<sub>3</sub>).

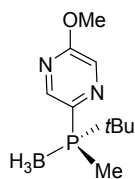

**(R)-2-(borane *tert*-butyl(methyl)phosphino)-5-methoxypyrazine.** Performed according to the general procedure to afford 40.0 mg (59%) of (*R*)-**3k** as white solid.  $^1\text{H}$  NMR (400 MHz,  $\text{CDCl}_3$ ):  $\delta$  8.66 (s, 1 H, Ar), 8.31 (s, 1 H, Ar), 4.01 (s, 3 H,  $\text{OCH}_3$ ), 1.58 (d,  $J = 8.0$  Hz, 3 H,  $\text{CH}_3$ ), 1.14 (d,  $J = 12.0$  Hz, 9 H,  $\text{C}(\text{CH}_3)_3$ ), 0.20 – 0.98 (m, 3 H,  $\text{BH}_3$ ).  $^{13}\text{C}$  NMR (101 MHz,  $\text{CDCl}_3$ ):  $\delta$  161.0 (d,  $J_{\text{C-P}} = 20.0$  Hz, Ar), 147.5 (d,  $J_{\text{C-P}} = 28.3$  Hz, Ar), 138.7 (d,  $J_{\text{C-P}} = 66.7$  Hz, Ar), 136.2 (d,  $J_{\text{C-P}} = 10.0$  Hz, Ar), 55.0 (s, *OMe*), 28.9 (d,  $J_{\text{C-P}} = 33.3$  Hz,  $\text{C}(\text{CH}_3)_3$ ), 25.3 (d,  $J_{\text{C-P}} = 3.0$  Hz,  $\text{C}(\text{CH}_3)_3$ ), 4.7 (d,  $J_{\text{C-P}} = 39.4$  Hz,  $\text{CH}_3$ ).  $^{31}\text{P}$  NMR (162 MHz,  $\text{CDCl}_3$ ):  $\delta$  24.4 (q,  $J = 59.9$  Hz). HRMS (ESI):  $m/z$ :  $[\text{M}+\text{H}-\text{BH}_3]^+$  calculated for  $\text{C}_{10}\text{H}_{18}\text{N}_2\text{OP}$ : 213.1151, found 213.1152. HPLC (Daicel Chiralcel OD-H, *n*-hexane/*i*-PrOH = 98/2, UV = 254 nm, flow rate = 0.8 mL/min)  $t_{\text{R}1} = 5.752$  min (major) and  $t_{\text{R}2} = 6.206$  min (minor), ee = 77%.  $[\alpha]_{\text{D}}^{25} = +9.5$  (c = 2.0,  $\text{CHCl}_3$ ).

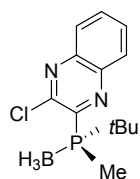

**(R)-2-(borane *tert*-butyl(methyl)phosphino)-3-chloroquinoxaline.** Performed according to the general procedure to afford 64 mg (76%) of (*R*)-**3l** as yellow solid.  $^1\text{H}$  NMR (400 MHz,  $\text{CDCl}_3$ ):  $\delta$  8.15 – 8.17 (m, 1 H, Ar), 8.05 – 8.08 (m, 1 H, Ar), 7.83 – 7.92 (m, 2 H, Ar), 1.81 (d,  $J = 8.0$  Hz, 3 H,  $\text{CH}_3$ ), 1.28 (d,  $J = 12.0$  Hz, 9 H,  $\text{C}(\text{CH}_3)_3$ ), 0.18 – 1.14 (m, 3 H,  $\text{BH}_3$ ).  $^{13}\text{C}$  NMR (101 MHz,  $\text{CDCl}_3$ ):  $\delta$  150.3 (d,  $J_{\text{C-P}} = 22.6$  Hz, Ar), 149.9 (d,  $J_{\text{C-P}} = 9.3$  Hz, Ar), 141.4 (s, Ar), 140.3 (s, Ar), 132.9 (s, Ar), 130.8 (s, Ar), 129.6 (s, Ar), 128.3 (s, Ar), 31.5 (d,  $J_{\text{C-P}} = 29.3$  Hz,  $\text{C}(\text{CH}_3)_3$ ), 26.0 (d,  $J_{\text{C-P}} = 2.0$  Hz,  $\text{C}(\text{CH}_3)_3$ ), 7.7 (d,  $J_{\text{C-P}} = 41.4$  Hz,  $\text{CH}_3$ ).  $^{31}\text{P}$  NMR (162 MHz,  $\text{CDCl}_3$ ):  $\delta$  37.9 (q,  $J = 53.5$  Hz). HRMS (ESI):  $m/z$ :  $[\text{M}+\text{H}-\text{BH}_3]^+$  calculated for  $\text{C}_{13}\text{H}_{17}\text{ClN}_2\text{P}$ : 267.0812, found 267.0813. HPLC (Daicel Chiralcel OD-H, *n*-hexane/*i*-PrOH = 98/2, UV = 254 nm, flow rate = 0.8 mL/min)  $t_{\text{R}1} = 11.847$  min (minor) and  $t_{\text{R}2} = 13.672$  min (major), ee = 94%.  $[\alpha]_{\text{D}}^{25} = +2.5$  (c = 2.0,  $\text{CHCl}_3$ ).

### 3. Procedures of palladium-catalyzed C–P coupling reactions under microwave conditions

To a reaction tube, (*R*)-*tert*-butyl(methyl)phosphine borane (35 mg, 0.3 mmol), aryl and heteroaryl halides (0.5 mmol),  $\text{Pd}(\text{OAc})_2$  (3.37 mg, 0.015 mmol), dppf (27.75 mg, 0.03 mmol), *t*BuONa (57.66 mg, 0.60 mmol) and toluene (3 mL) were added under argon. The mixture was stirred for 6 h under microwave conditions. After removal of the volatile materials under reduced pressure, the crude product was purified by chromatograph on silica gel. (*n*-hexane / dichloromethane).

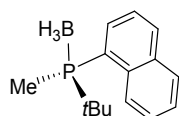

**(S)-*tert*-butyl(methyl)(naphthalen-1-yl)phosphine Borane.**<sup>2</sup> Performed according to the microwave reactions procedure to afford 47.2 mg (64%) of (*S*)-**2a** as white solid.  $^1\text{H}$  NMR (400 MHz,  $\text{CDCl}_3$ ):  $\delta$  8.90 (d,  $J = 8.0$  Hz, 1 H, Ar), 7.99 (d,  $J = 8.0$  Hz, 1 H, Ar), 7.87 (d,  $J = 8.0$  Hz, 1 H, Ar), 7.75 – 7.80 (m, 1 H, Ar), 7.61 – 7.75 (m, 1 H, Ar), 7.49 – 7.53 (m, 2 H, Ar), 1.78 (d,  $J = 12.0$  Hz, 3 H,  $\text{CH}_3$ ), 1.16 (d,  $J = 16.0$  Hz, 9 H,  $\text{C}(\text{CH}_3)_3$ ), 0.79 – 1.57 (m, 3 H,  $\text{BH}_3$ ).  $^{31}\text{P}$  NMR (162 MHz,  $\text{CDCl}_3$ ):  $\delta$  23.9 (q,  $J = 66.4$  Hz). HPLC (Daicel Chiralcel AS-H, *n*-hexane/*i*-PrOH = 95/5, UV = 250 nm, flow rate = 1.0 mL/min)  $t_{\text{R}1} = 5.430$  min (major), ee = 99%.  $[\alpha]_{\text{D}}^{25} = -23.0$  (c = 2.0,  $\text{CHCl}_3$ ).

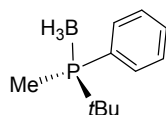

**(S)-tert-butyl(methyl)(phenyl)phosphine Borane.**<sup>2</sup> Performed according to the microwave reactions procedure to afford 50.6 mg (87%) of (S)-**2b** as white solid. <sup>1</sup>H NMR (400 MHz, CDCl<sub>3</sub>): δ 7.69 – 7.73 (m, 2 H, Ar), 7.43 – 7.52 (m, 3 H, Ar), 1.58 (d, *J* = 12.0 Hz, 3 H, CH<sub>3</sub>), 1.11 (d, *J* = 12.0 Hz, 9 H, C(CH<sub>3</sub>)<sub>3</sub>), 0.24 – 1.07 (m, 3 H, BH<sub>3</sub>). <sup>31</sup>P NMR (162 MHz, CDCl<sub>3</sub>): δ 25.0 (q, *J* = 63.2 Hz). HPLC (Daicel Chiralcel AS-H, *n*-hexane/*i*-PrOH = 95/5, UV = 230 nm, flow rate = 1.0 mL/min) *t*<sub>R1</sub> = 7.908 min (major) and *t*<sub>R2</sub> = 8.829 min (minor), ee = 99%. [α]<sub>D</sub><sup>25</sup> = -14.5 (c = 2.0, CHCl<sub>3</sub>).

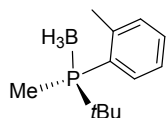

**(S)-tert-butyl(methyl)(o-tolyl)phosphine Borane.**<sup>2</sup> Performed according to the microwave reactions procedure to afford 40.7 mg (65%) of (S)-**2d** as white solid. <sup>1</sup>H NMR (400 MHz, CDCl<sub>3</sub>): δ 7.52 – 7.56 (m, 1 H, Ar), 7.35 – 7.39 (m, 1 H, Ar), 7.23 – 7.26 (m, 2 H, Ar), 2.66 (s, 3 H, CH<sub>3</sub>), 1.64 (d, *J* = 8.0 Hz, 3 H, CH<sub>3</sub>), 1.14 (d, *J* = 16.0 Hz, 9 H, C(CH<sub>3</sub>)<sub>3</sub>), 0.19 – 1.10 (m, 3 H, BH<sub>3</sub>). <sup>31</sup>P NMR (162 MHz, CDCl<sub>3</sub>): δ 25.1 (q, *J* = 59.9 Hz). HPLC (Daicel Chiralcel OD-H, *n*-hexane/*i*-PrOH = 98/2, UV = 230 nm, flow rate = 0.5 mL/min) *t*<sub>R1</sub> = 13.211 min (major) and *t*<sub>R2</sub> = 14.302 min (minor), ee = 92%. [α]<sub>D</sub><sup>25</sup> = -12.5 (c = 2.0, CHCl<sub>3</sub>).

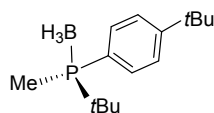

**(S)-tert-butyl(4-(tert-butyl)phenyl)(methyl)phosphine Borane.** Performed according to the microwave reactions procedure to afford 35.3 mg (50%) of (S)-**2e** as white solid. <sup>1</sup>H NMR (400 MHz, CDCl<sub>3</sub>) δ 7.61 – 7.65 (m, 2 H, Ar), 7.45 – 7.47 (m, 2 H, Ar), 1.55 (d, *J* = 8.0 Hz, 3 H, CH<sub>3</sub>), 1.33 (s, 9 H, C(CH<sub>3</sub>)<sub>3</sub>), 1.11 (d, *J* = 12.0 Hz, 9 H, C(CH<sub>3</sub>)<sub>3</sub>), 0.18 – 1.05 (m, 3 H, BH<sub>3</sub>). <sup>31</sup>P NMR (162 MHz, CDCl<sub>3</sub>): δ 23.7 (q, *J* = 66.4 Hz). HPLC (Daicel Chiralcel AS-H, *n*-hexane/*i*-PrOH = 99/1, UV = 254 nm, flow rate = 1.0 mL/min) *t*<sub>R1</sub> = 4.992 min (minor) and *t*<sub>R2</sub> = 5.519 min (major), ee = 88%. [α]<sub>D</sub><sup>25</sup> = -7.3 (c = 2.0, CHCl<sub>3</sub>).

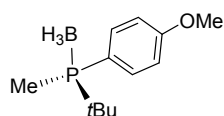

**(S)-tert-butyl(4-methoxyphenyl)(methyl)phosphine Borane.** Performed according to the microwave reactions procedure to afford 53.7 mg (80%) of (S)-**2f** as white solid. <sup>1</sup>H NMR (400 MHz, CDCl<sub>3</sub>): δ 7.61 – 7.65 (m, 2 H, Ar), 6.96 – 6.98 (m, 2 H, Ar), 3.85 (s, 3 H, OCH<sub>3</sub>), 1.54 (d, *J* = 8.0 Hz, 3 H, CH<sub>3</sub>), 1.09 (d, *J* = 16.0 Hz, 9 H, C(CH<sub>3</sub>)<sub>3</sub>). 0.35 – 0.91 (m, 3 H, BH<sub>3</sub>). <sup>31</sup>P NMR (162 MHz, CDCl<sub>3</sub>): δ 23.2 (q, *J* = 69.7 Hz). HPLC (Daicel Chiralcel AS-H, *n*-hexane/*i*-PrOH = 98/2, UV = 250 nm, flow rate = 0.8 mL/min) *t*<sub>R1</sub> = 21.932 min (major) and *t*<sub>R2</sub> = 24.014 min (minor), ee = 95%. [α]<sub>D</sub><sup>25</sup> = -8.3 (c = 2.0, CHCl<sub>3</sub>).

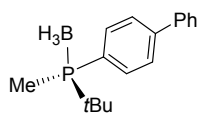

**(S)-[1,1'-biphenyl]-4-yl(tert-butyl)(methyl)phosphine Borane.** Performed according to the microwave reactions procedure to afford 57.4 mg (70%) of (S)-**2h** as white solid. <sup>1</sup>H NMR (400 MHz, CDCl<sub>3</sub>): δ 7.75 – 7.81 (m, 2 H, Ar), 7.66 – 7.68 (m, 2 H, Ar), 7.61 (d, *J* = 4.0 Hz, 2 H, Ar), 7.45 – 7.49 (m, 2 H, Ar), 7.37 – 7.41 (m, 1 H, Ar), 1.61 (d, *J* = 12.0 Hz, 3 H, CH<sub>3</sub>), 1.14 (d, *J* = 12.0 Hz, 9 H, C(CH<sub>3</sub>)<sub>3</sub>), 0.24 – 0.95 (m, 3 H, BH<sub>3</sub>). <sup>31</sup>P NMR (162 MHz, CDCl<sub>3</sub>): δ 24.7 (q, *J* = 77.8 Hz). HPLC (Daicel Chiralcel OD-H, *n*-hexane/*i*-PrOH = 95/5, UV = 250 nm, flow rate = 0.8 mL/min) *t*<sub>R1</sub> = 7.872 min (minor) and *t*<sub>R2</sub> = 8.778 min (major), ee = 93%. [α]<sub>D</sub><sup>25</sup> = -12.0 (c = 2.0, CHCl<sub>3</sub>).

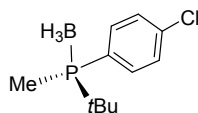

**(S)-tert-butyl(4-chlorophenyl)(methyl)phosphine Borane.** Performed according to the microwave reactions procedure to afford 46.6 mg (68%) of (S)-**2j** as white solid.  $^1\text{H}$  NMR (400 MHz,  $\text{CDCl}_3$ ):  $\delta$  7.60 – 7.69 (m, 2 H, Ar), 7.37 – 7.51 (m, 2 H, Ar), 1.57 (d,  $J$  = 12.0 Hz, 3 H,  $\text{CH}_3$ ), 1.10 (d,  $J$  = 16.0 Hz, 9 H,  $\text{C}(\text{CH}_3)_3$ ), 0.22 – 0.85 (m, 3 H,  $\text{BH}_3$ ).  $^{31}\text{P}$  NMR (162 MHz,  $\text{CDCl}_3$ ):  $\delta$  25.4 (q,  $J$  = 63.2 Hz). HPLC (Daicel Chiralcel AS-H, *n*-hexane/*i*-PrOH = 99/1, UV = 234 nm, flow rate = 1.0 mL/min)  $t_{\text{R}1}$  = 9.679 min (major) and  $t_{\text{R}2}$  = 12.252 min (minor), ee = 95%.  $[\alpha]_{\text{D}}^{25}$  = -12.3 (c = 2.0,  $\text{CHCl}_3$ ).

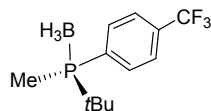

**(S)-tert-butyl(methyl)(4-(trifluoromethyl)phenyl)phosphine Borane.** Performed according to the microwave reactions procedure to afford 31.4 mg (40%) of (S)-**2k** as white solid.  $^1\text{H}$  NMR (400 MHz,  $\text{CDCl}_3$ ):  $\delta$  7.83 – 7.88 (m, 2 H, Ar), 7.72 (d,  $J$  = 8.0 Hz, 2 H, Ar), 1.61 (d,  $J$  = 12.0 Hz, 3 H,  $\text{CH}_3$ ), 1.13 (d,  $J$  = 12.0 Hz, 9 H,  $\text{C}(\text{CH}_3)_3$ ), 0.25 – 0.85 (m, 3 H,  $\text{BH}_3$ ).  $^{31}\text{P}$  NMR (162 MHz,  $\text{CDCl}_3$ ):  $\delta$  26.9 (q,  $J$  = 59.9 Hz). HPLC (Daicel Chiralcel AS-H, *n*-hexane/*i*-PrOH = 99/1, UV = 254 nm, flow rate = 1.0 mL/min)  $t_{\text{R}1}$  = 6.399 min (major) and  $t_{\text{R}2}$  = 6.745 min (minor), ee = 94%.  $[\alpha]_{\text{D}}^{25}$  = -33.0 (c = 2.0,  $\text{CHCl}_3$ ).

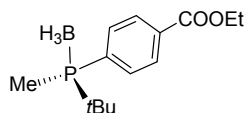

**(S)-ethyl 4-(borane tert-butyl(methyl)phosphino)benzoate.** Performed according to the microwave reactions procedure to afford 50.3 mg (63%) of (S)-**2n** as white solid.  $^1\text{H}$  NMR (400 MHz,  $\text{CDCl}_3$ ):  $\delta$  8.10 – 8.12 (m, 2 H, Ar), 7.77 – 7.81 (m, 2 H, Ar), 4.41 (q,  $J$  = 7.1 Hz, 2 H,  $\text{CH}_2\text{CH}_3$ ), 1.61 (d,  $J$  = 12.0 Hz, 3 H,  $\text{CH}_2\text{CH}_3$ ), 1.39 – 1.43 (m, 3 H,  $\text{CH}_3$ ), 1.11 (d,  $J$  = 16.0 Hz, 9 H,  $\text{C}(\text{CH}_3)_3$ ), 0.21 – 0.87 (m, 3 H,  $\text{BH}_3$ ).  $^{31}\text{P}$  NMR (162 MHz,  $\text{CDCl}_3$ ):  $\delta$  26.4 (q,  $J$  = 74.5 Hz). HPLC (Daicel Chiralcel OD-H, *n*-hexane/*i*-PrOH = 98/2, UV = 230 nm, flow rate = 0.8 mL/min)  $t_{\text{R}1}$  = 14.957 min (minor) and  $t_{\text{R}2}$  = 16.501 min (major), ee = 97%.  $[\alpha]_{\text{D}}^{25}$  = -28.0 (c = 2.0,  $\text{CHCl}_3$ ).

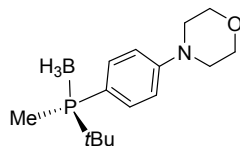

**(S)-4-(4-(borane tert-butyl(methyl)phosphino)phenyl)morpholine.** Performed according to the microwave reactions procedure to afford 65.8 mg (79%) of (S)-**3b** as white solid.  $^1\text{H}$  NMR (400 MHz,  $\text{CDCl}_3$ ):  $\delta$  7.56 – 7.60 (m, 2 H, Ar), 6.91 – 6.94 (m, 2 H, Ar), 3.83 – 3.90 (m, 4 H,  $\text{CH}_2$ ), 3.21 – 3.29 (m, 4 H,  $\text{CH}_2$ ), 1.52 (d,  $J$  = 12.0 Hz, 3 H,  $\text{CH}_3$ ), 1.09 (d,  $J$  = 16.0 Hz, 9 H,  $\text{C}(\text{CH}_3)_3$ ), 0.19 – 0.88 (m, 3 H,  $\text{BH}_3$ ).  $^{31}\text{P}$  NMR (162 MHz,  $\text{CDCl}_3$ ):  $\delta$  22.4 (q,  $J$  = 77.8 Hz). HPLC (Daicel Chiralcel OD-H, *n*-hexane/*i*-PrOH = 90/10, UV = 250 nm, flow rate = 1.0 mL/min)  $t_{\text{R}1}$  = 11.772 min (major) and  $t_{\text{R}2}$  = 16.287 min (minor), ee = 91%.  $[\alpha]_{\text{D}}^{25}$  = -12.0 (c = 2.0,  $\text{CHCl}_3$ ).

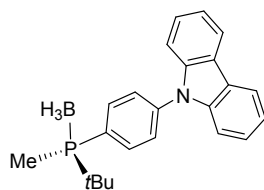

**(S)-9-(4-(borane tert-butyl(methyl)phosphino)phenyl)-9H-carbazole.** Performed according to the microwave reactions procedure to afford 52.1 mg (43%) of (S)-**3d** as white solid.  $^1\text{H}$  NMR (400 MHz,  $\text{CDCl}_3$ ):  $\delta$  8.15 (d,  $J$  = 8.0

Hz, 2 H, Ar), 7.91 – 7.99 (m, 2 H, Ar), 7.67 – 7.74 (m, 2 H, Ar), 7.41 – 7.49 (m, 4 H, Ar), 7.29 – 7.35 (m, 2 H, Ar), 1.67 (d,  $J = 8.0$  Hz, 3 H,  $\text{CH}_3$ ), 1.21 (d,  $J = 16.0$  Hz, 9 H,  $\text{C}(\text{CH}_3)_3$ ), 0.26 – 0.93 (m, 3 H,  $\text{BH}_3$ ).  $^{31}\text{P}$  NMR (162 MHz,  $\text{CDCl}_3$ ):  $\delta$  25.5 (q,  $J = 66.4$  Hz). HPLC (Daicel Chiralcel AS-H,  $n$ -hexane/ $i$ -PrOH = 98/2, UV = 254 nm, flow rate = 0.5 mL/min)  $t_{\text{R}1} = 18.379$  min (minor) and  $t_{\text{R}2} = 20.599$  min (major), ee = 90%.  $[\alpha]_{\text{D}}^{25} = -6.0$  ( $c = 2.0$ ,  $\text{CHCl}_3$ ).

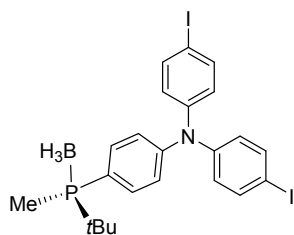

**(S)-4-(borane tert-butyl(methyl)phosphino)-N,N-bis(4-iodophenyl)aniline.** Performed according to the microwave reactions procedure to afford 81.5 mg (45%) of (S)-**3f** as white solid.  $^1\text{H}$  NMR (400 MHz,  $\text{CDCl}_3$ ):  $\delta$  7.46 – 7.51 (m, 2 H, Ar), 7.28 – 7.32 (m, 4 H, Ar), 7.13 (d,  $J = 8.0$  Hz, 4 H, Ar), 7.02 – 7.04 (m, 2 H, Ar), 1.52 (d,  $J = 8.0$  Hz, 3 H,  $\text{CH}_3$ ), 1.12 (d,  $J = 12.0$  Hz, 9 H,  $\text{C}(\text{CH}_3)_3$ ), 0.26 – 0.86 (m, 3 H,  $\text{BH}_3$ ).  $^{31}\text{P}$  NMR (162 MHz,  $\text{CDCl}_3$ ):  $\delta$  23.7 (q,  $J = 45.4$  Hz). HPLC (Daicel Chiralcel OD-H,  $n$ -hexane/ $i$ -PrOH = 90/10, UV = 254 nm, flow rate = 1.0 mL/min)  $t_{\text{R}1} = 9.797$  min (minor) and  $t_{\text{R}2} = 11.418$  min (major), ee = 95%.  $[\alpha]_{\text{D}}^{25} = -6.5$  ( $c = 2.0$ ,  $\text{CHCl}_3$ ).

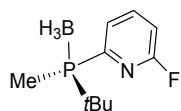

**(S)-2-(borane tert-butyl(methyl)phosphino)-6-fluoropyridine.** Performed according to the microwave reactions procedure to afford 43.2 mg (56%) of (S)-**3g** as white solid.  $^1\text{H}$  NMR (400 MHz,  $\text{CDCl}_3$ ):  $\delta$  7.88 – 7.92 (m, 1 H, Ar), 7.69 – 7.73 (m, 1 H, Ar), 7.37 (d,  $J = 8.0$  Hz, 1 H, Ar), 1.60 (d,  $J = 8.0$  Hz, 3 H,  $\text{CH}_3$ ), 1.11 (d,  $J = 16.0$  Hz, 9 H,  $\text{C}(\text{CH}_3)_3$ ), 0.26 – 0.98 (m, 3 H,  $\text{BH}_3$ ).  $^{31}\text{P}$  NMR (162 MHz,  $\text{CDCl}_3$ ):  $\delta$  30.5 (q,  $J = 61.6$  Hz). HPLC (Daicel Chiralcel AS-H,  $n$ -hexane/ $i$ -PrOH = 98/2, UV = 250 nm, flow rate = 1.0 mL/min)  $t_{\text{R}1} = 11.471$  min (major) and  $t_{\text{R}2} = 12.718$  min (minor), ee = 93%.  $[\alpha]_{\text{D}}^{25} = -34.0$  ( $c = 2.0$ ,  $\text{CHCl}_3$ ).

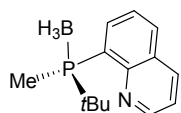

**(S)-8-(borane tert-butyl(methyl)phosphino)quinoline.** Performed according to the microwave reactions procedure to afford 22.6 mg (26%) of (S)-**3j** as white solid.  $^1\text{H}$  NMR (400 MHz,  $\text{CDCl}_3$ ):  $\delta$  8.91 – 8.93 (m, 1 H, Ar), 8.50 – 8.55 (m, 1 H, Ar), 8.19 (d,  $J = 8.0$  Hz, 1 H, Ar), 7.96 (d,  $J = 8.0$  Hz, 1 H, Ar), 7.57 – 7.64 (m, 1 H, Ar), 7.42 – 7.45 (m, 1 H, Ar), 2.10 (d,  $J = 8.0$  Hz, 3 H,  $\text{CH}_3$ ), 1.18 (d,  $J = 12.0$  Hz, 9 H,  $\text{C}(\text{CH}_3)_3$ ), 0.26 – 0.90 (m, 3 H,  $\text{BH}_3$ ).  $^{31}\text{P}$  NMR (162 MHz,  $\text{CDCl}_3$ ):  $\delta$  31.0 (q,  $J = 63.2$  Hz). HPLC (Daicel Chiralcel OD-H,  $n$ -hexane/ $i$ -PrOH = 98/2, UV = 250 nm, flow rate = 1.0 mL/min)  $t_{\text{R}1} = 6.791$  min (major) and  $t_{\text{R}2} = 7.931$  min (minor), ee = 71%.  $[\alpha]_{\text{D}}^{25} = -27.0$  ( $c = 2.0$ ,  $\text{CHCl}_3$ ).

#### 4. X-ray structural determination

The X-ray data was collected on a Rigaku Saturn CCD diffractometer using graphite-monochromated Mo  $K\alpha$  radiation ( $\lambda = 0.71073$  Å). The structure was solved by direct methods (SHELXS-97)<sup>3</sup> and refined by full-matrix least squares on  $F^2$ . All non-hydrogen atoms were refined anisotropically and hydrogen atoms by a riding model (SHELXL-97).<sup>4</sup> The crystal data and structural refinements details are listed in Table S1. CCDC 2017943 ((S)-**2q**), and CCDC 2017887 ((R)-**2h**) contain the supplementary crystallographic data for this paper. This data can be obtained free of charge from The Cambridge Crystallographic Data Centre via [www.ccdc.cam.ac.uk/data\\_request/cif](http://www.ccdc.cam.ac.uk/data_request/cif).

**Table S1.** Crystal Data and Summary of X-ray Data Collection for compound (S)-2q and (R)-2h

|                                           | (S)-2q                             | (R)-2h                             |
|-------------------------------------------|------------------------------------|------------------------------------|
| formula                                   | C <sub>20</sub> H <sub>28</sub> BP | C <sub>17</sub> H <sub>24</sub> BP |
| fw                                        | 310.20                             | 270.14                             |
| T (K)                                     | 296                                | 296                                |
| space group                               | P 21 21 21                         | P 21 21 21                         |
| crystal system                            | Orthorhombic                       | Orthorhombic                       |
| a (Å)                                     | 11.2902(16)                        | 6.6359(9)                          |
| b (Å)                                     | 12.3392(18)                        | 7.5137(10)                         |
| c (Å)                                     | 13.6341(19)                        | 34.018(5)                          |
| α (deg.)                                  | 90°                                | 90°                                |
| β (deg.)                                  | 90°                                | 90°                                |
| γ (deg.)                                  | 90°                                | 90°                                |
| V (Å <sup>3</sup> )                       | 1899.4(5)                          | 90(19)                             |
| Z                                         | 4                                  | 4                                  |
| d <sub>calcd.</sub> (mg/cm <sup>3</sup> ) | 1.085                              | 1.058                              |
| F(000)                                    | 672.0                              | 584                                |
| GOF                                       | 1.078                              | 1.248                              |
| R1 (I > 2σ (I))                           | 0.0358                             | 0.0840                             |
| wR2 (all data)                            | 0.1017                             | 0.1430                             |

## 5. References

1. (a) E. Salomó, A. Prades, A. Riera, and X. Verdaguer, *J. Org. Chem.*, 2017, **82**, 7065; (b) E. Salomó, S. Orgué, A. Riera, X. Verdaguer, *Synthesis*, 2016, **48**, 2659.
2. D. Gatineau, L. Giordano and G. Buono, *J. Am. Chem. Soc.*, 2011, **133**, 10728.
3. G. M. Sheldrick, SHELXS-90/96, Program for Structure Solution, *Acta Crystallogr. Sect A* 1990, **46**, 467.
4. G. M. Sheldrick, SHELXL 97, Program for Crystal structure Refinement, University of Goettingen:Geottingen, Germany, 1997.



6.  $^1\text{H}$ ,  $^{13}\text{C}$ ,  $^{19}\text{F}$  and  $^{31}\text{P}$  NMR spectra for all products.

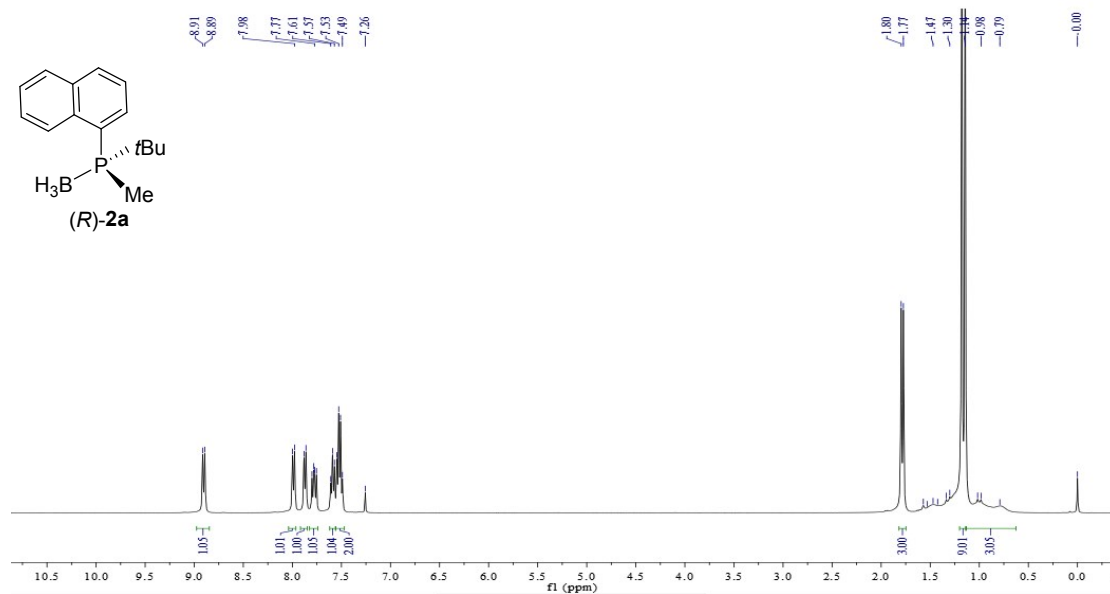

Figure S1.  $^1\text{H}$  NMR spectrum of *(R)*-2a in  $\text{CDCl}_3$

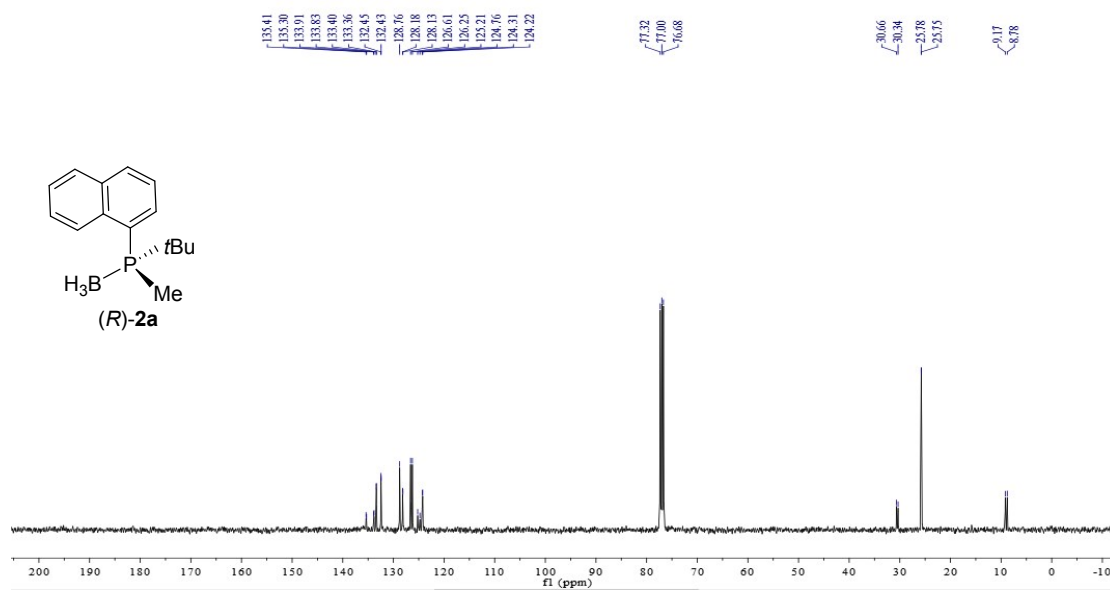

Figure S2.  $^{13}\text{C}$  NMR spectrum of *(R)*-2a in  $\text{CDCl}_3$

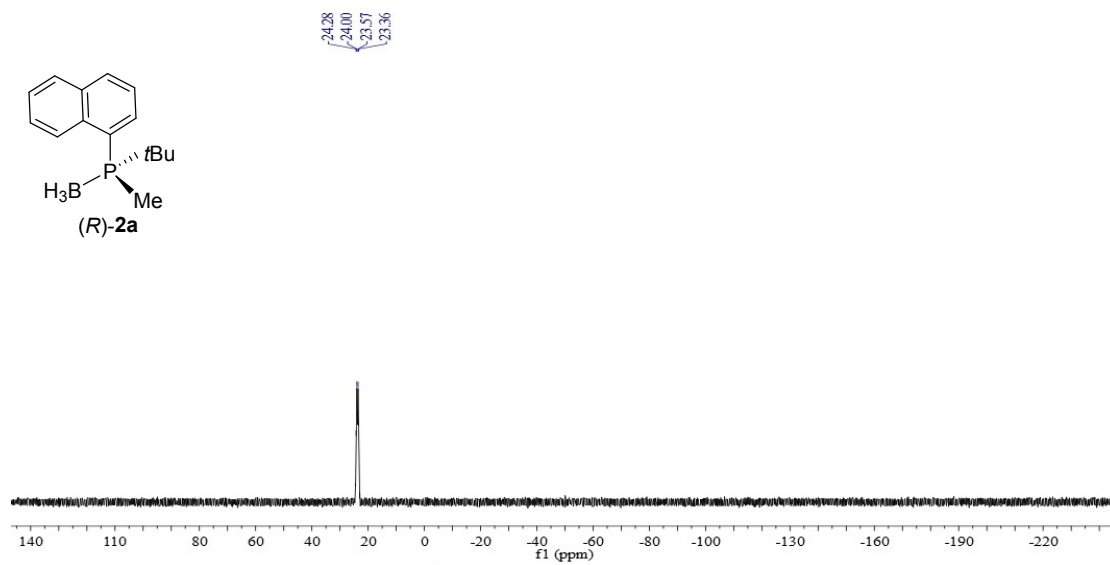

Figure S3. <sup>31</sup>P NMR spectrum of *(R)*-2a in CDCl<sub>3</sub>

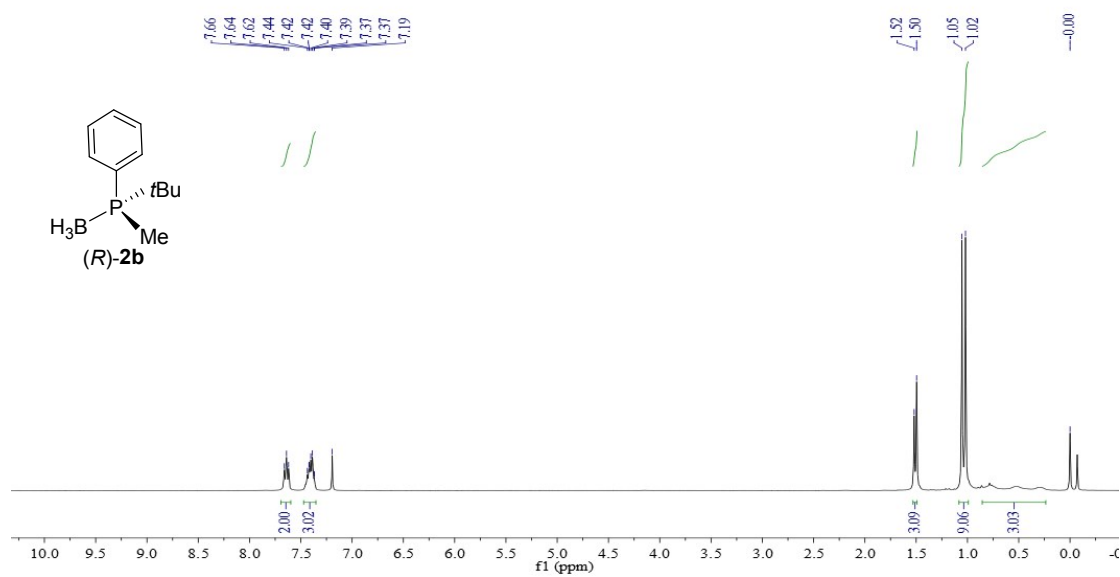

Figure S4. <sup>1</sup>H NMR spectrum of *(R)*-2b in CDCl<sub>3</sub>

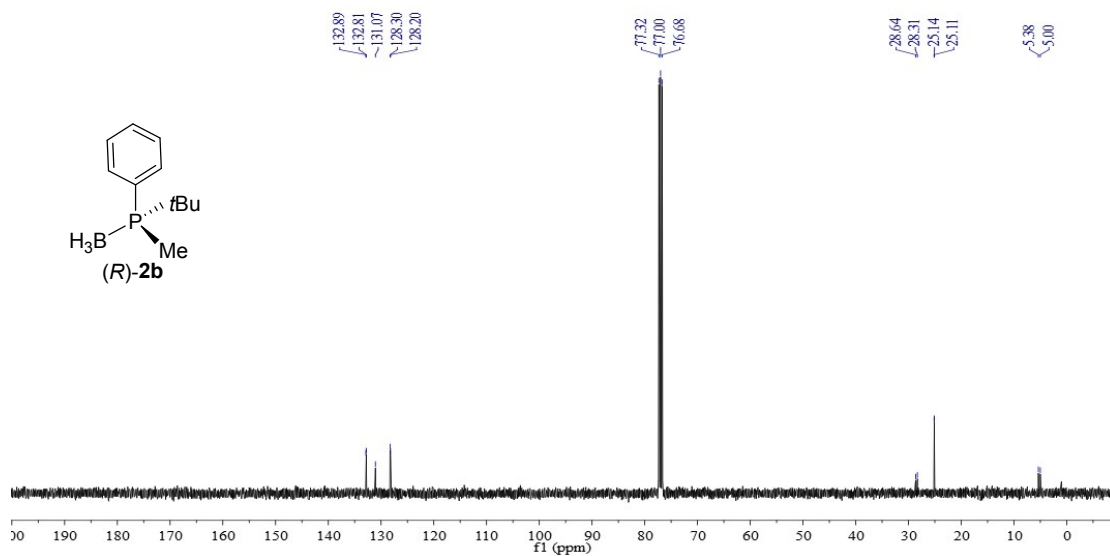

Figure S5. <sup>13</sup>C NMR spectrum of *(R)*-**2b** in CDCl<sub>3</sub>

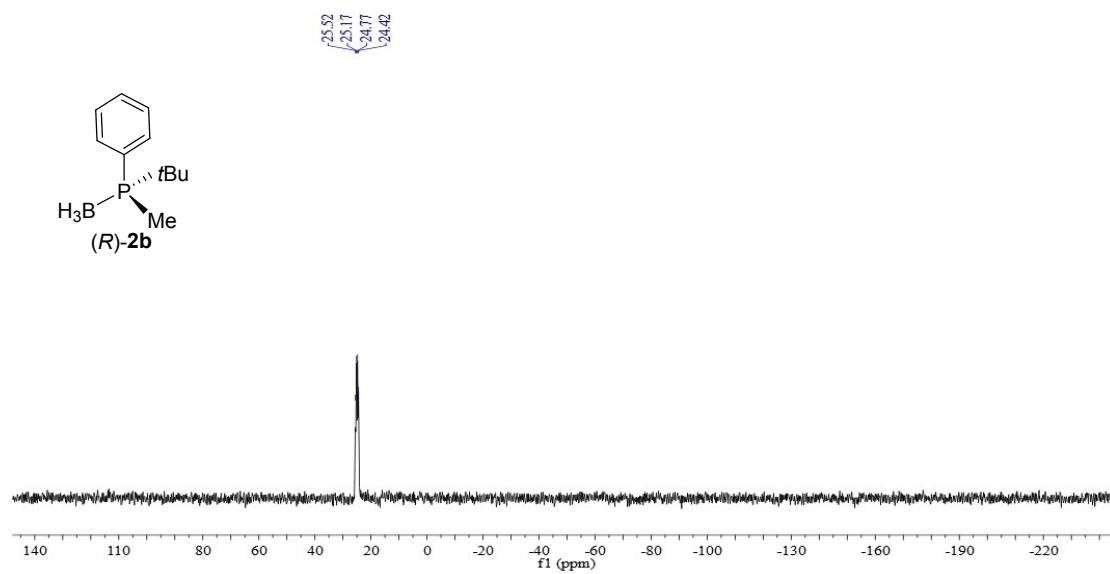

Figure S6. <sup>31</sup>P NMR spectrum of *(R)*-**2b** in CDCl<sub>3</sub>

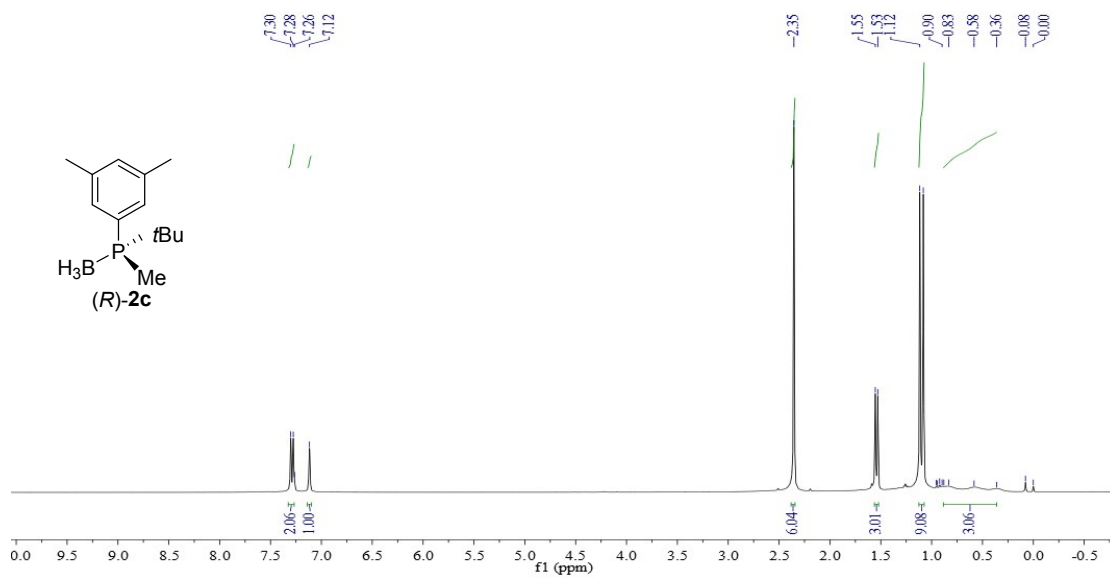

Figure S7. <sup>1</sup>H NMR spectrum of (R)-2c in CDCl<sub>3</sub>

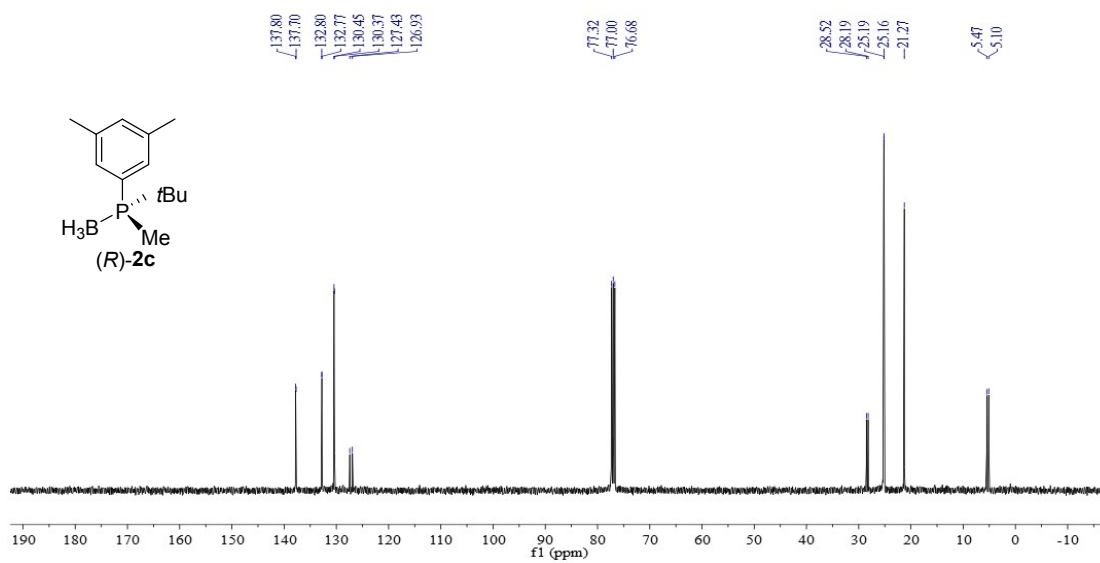

Figure S8. <sup>13</sup>C NMR spectrum of (R)-2c in CDCl<sub>3</sub>

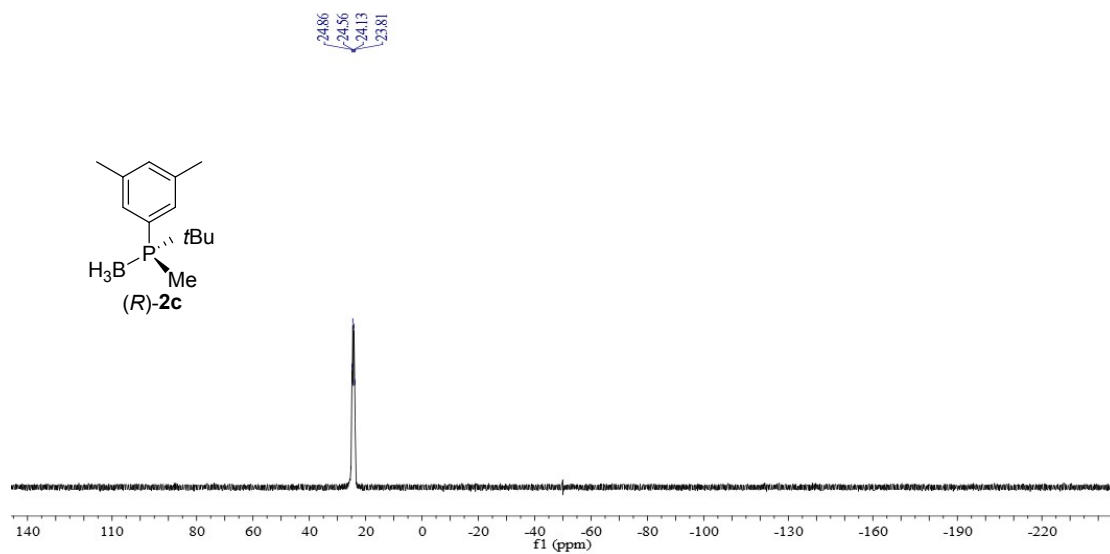

Figure S9.  $^{31}\text{P}$  NMR spectrum of (R)-2c in  $\text{CDCl}_3$

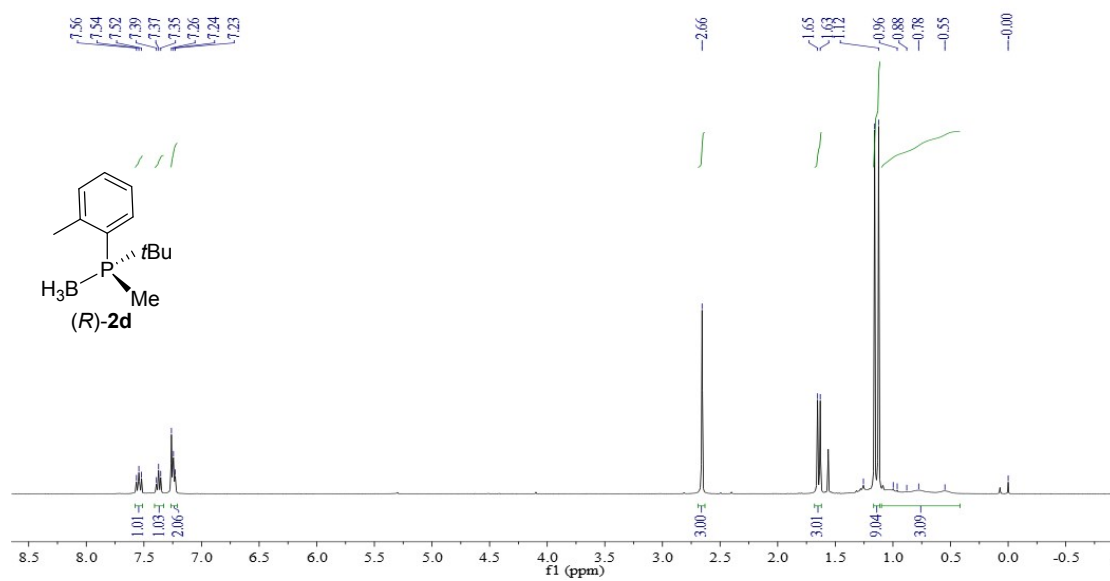

Figure S10.  $^1\text{H}$  NMR spectrum of (R)-2d in  $\text{CDCl}_3$

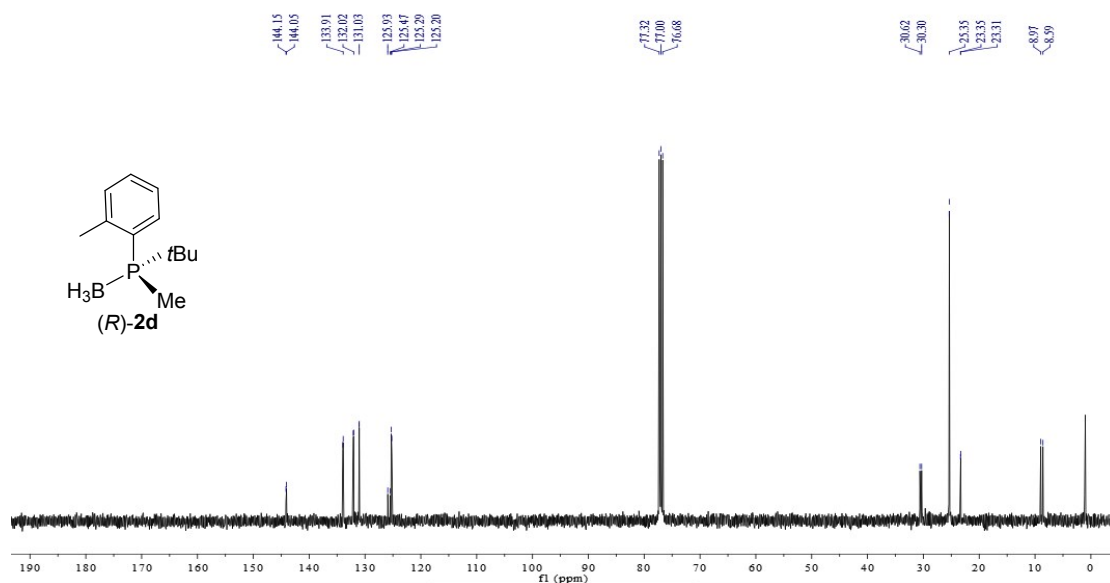

Figure S11. <sup>13</sup>C NMR spectrum of (R)-2d in CDCl<sub>3</sub>

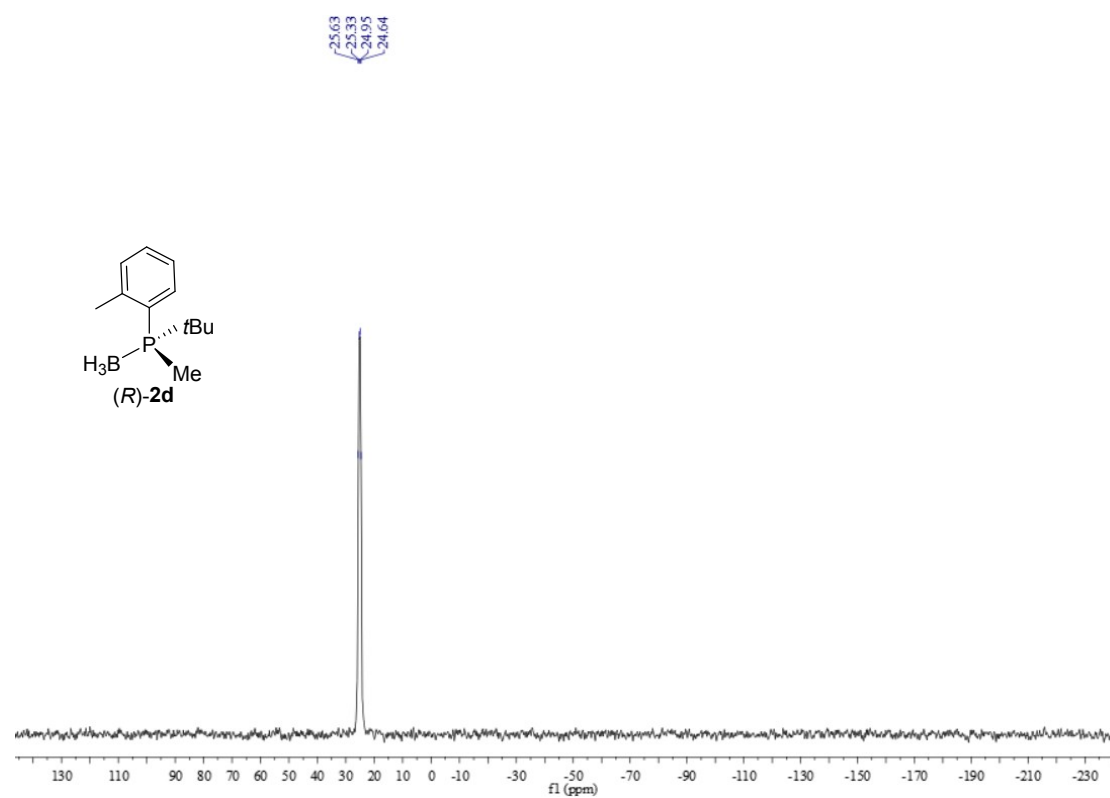

Figure S12. <sup>31</sup>P NMR spectrum of (R)-2d in CDCl<sub>3</sub>

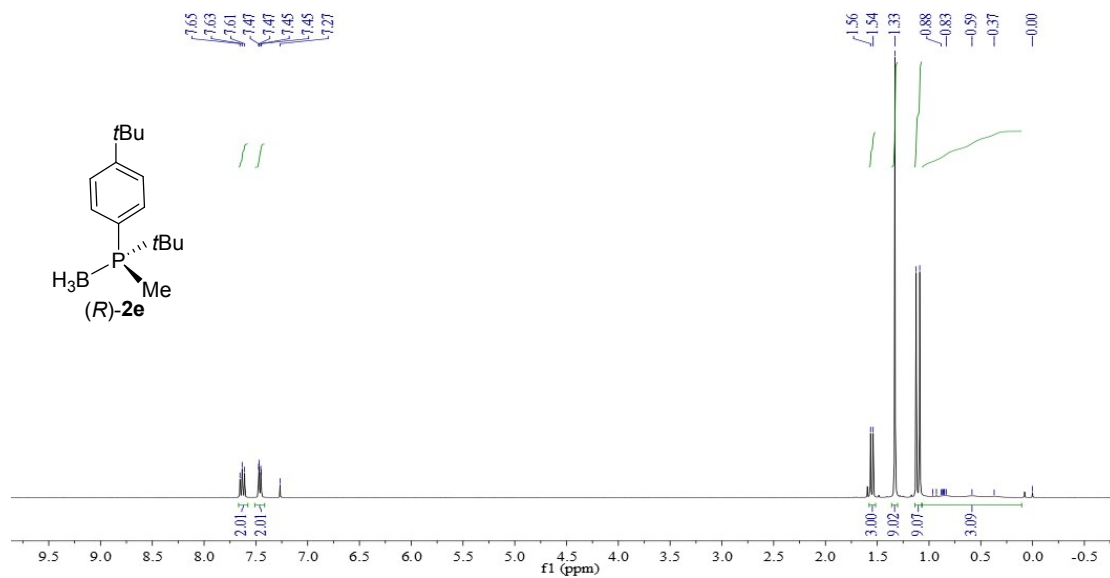

Figure S13. <sup>1</sup>H NMR spectrum of *(R)*-**2e** in CDCl<sub>3</sub>

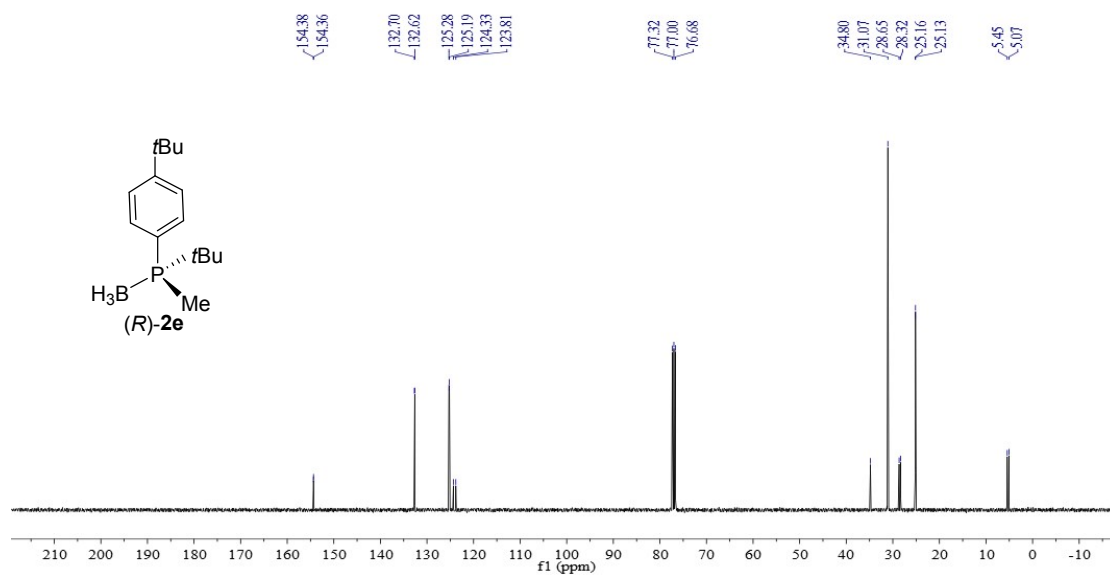

Figure S14. <sup>13</sup>C NMR spectrum of *(R)*-**2e** in CDCl<sub>3</sub>

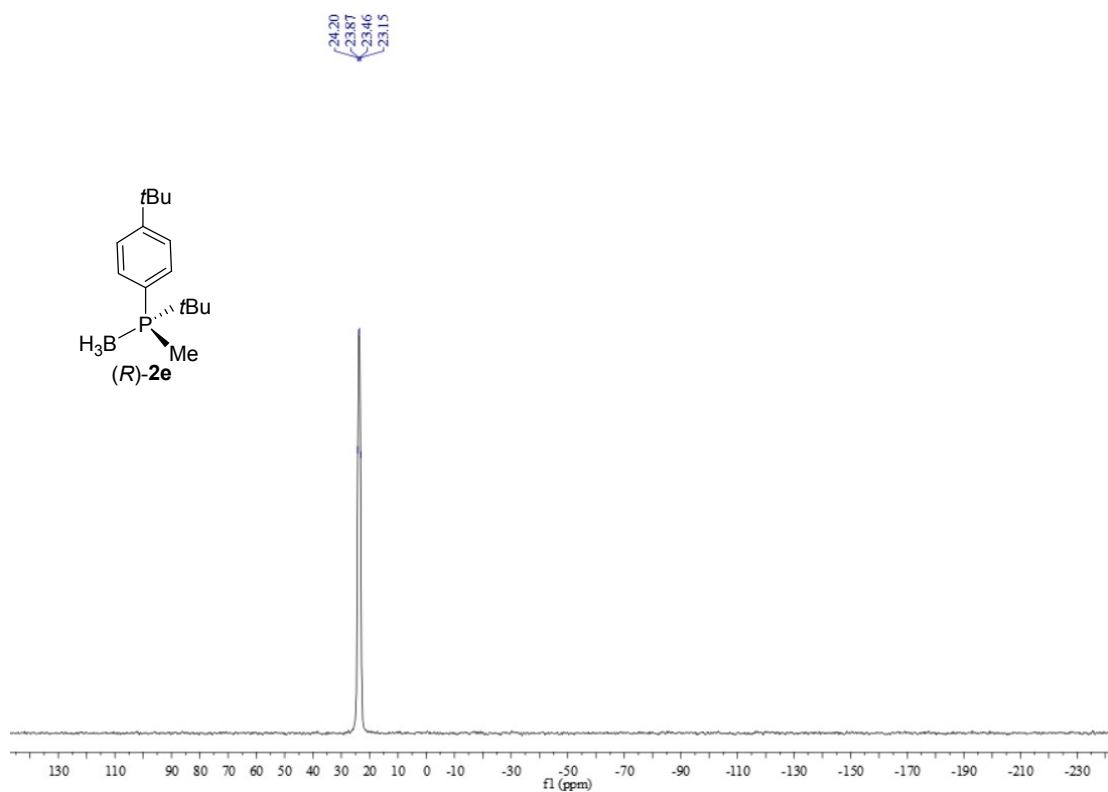

Figure S15. <sup>31</sup>P NMR spectrum of *(R)*-2e in CDCl<sub>3</sub>

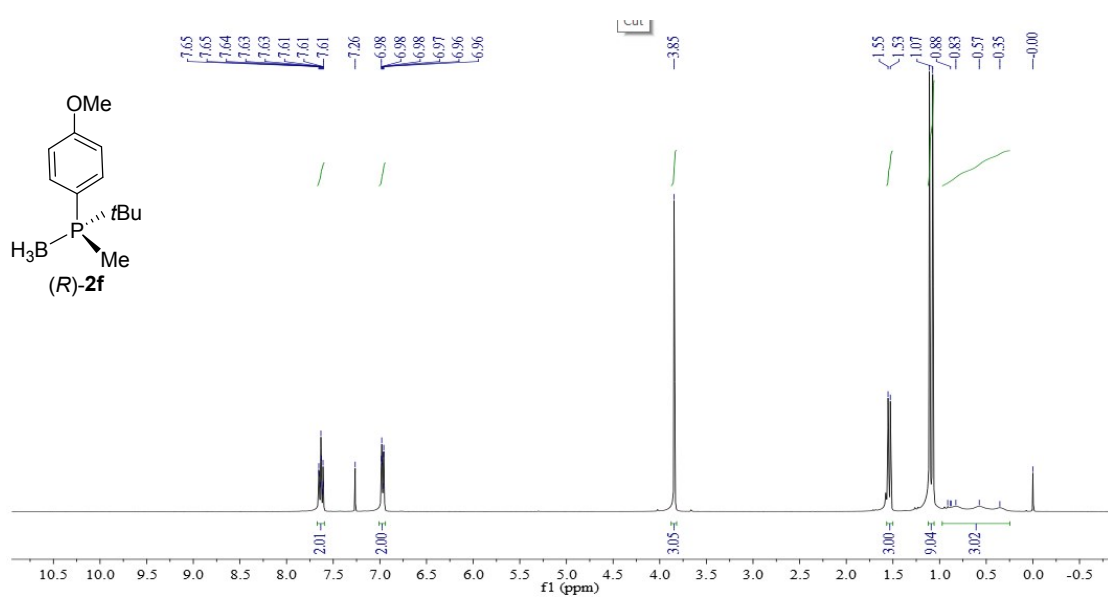

Figure S16. <sup>1</sup>H NMR spectrum of *(R)*-2f in CDCl<sub>3</sub>



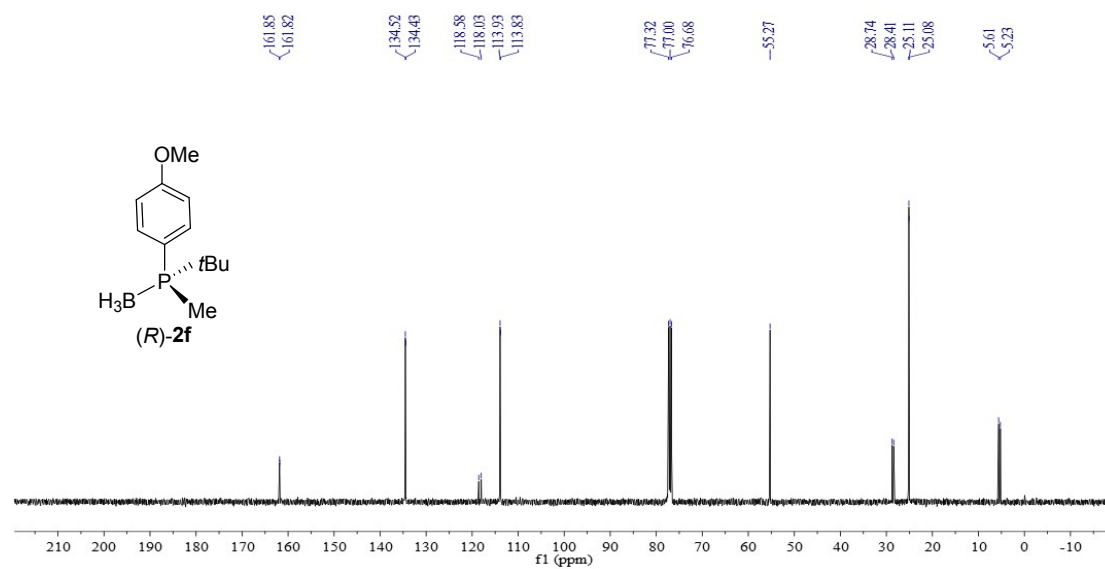

Figure S17.  $^{13}\text{C}$  NMR spectrum of *(R)*-**2f** in  $\text{CDCl}_3$

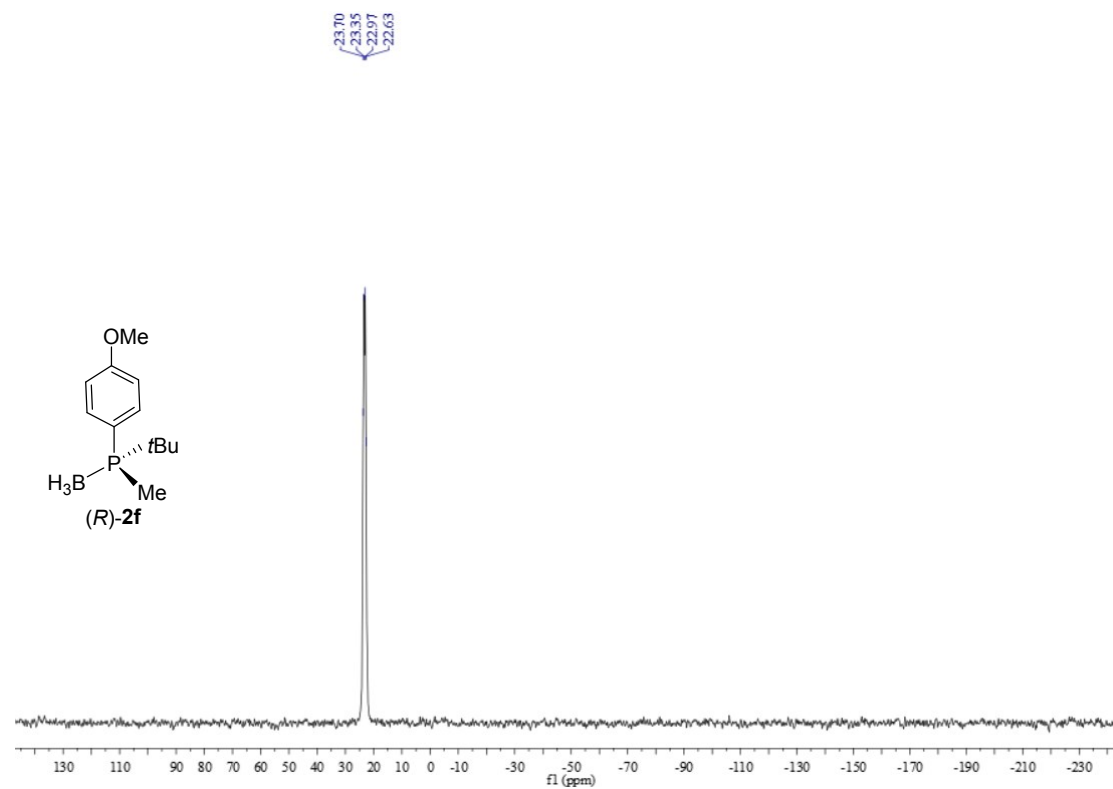

Figure S18.  $^{31}\text{P}$  NMR spectrum of *(R)*-**2f** in  $\text{CDCl}_3$

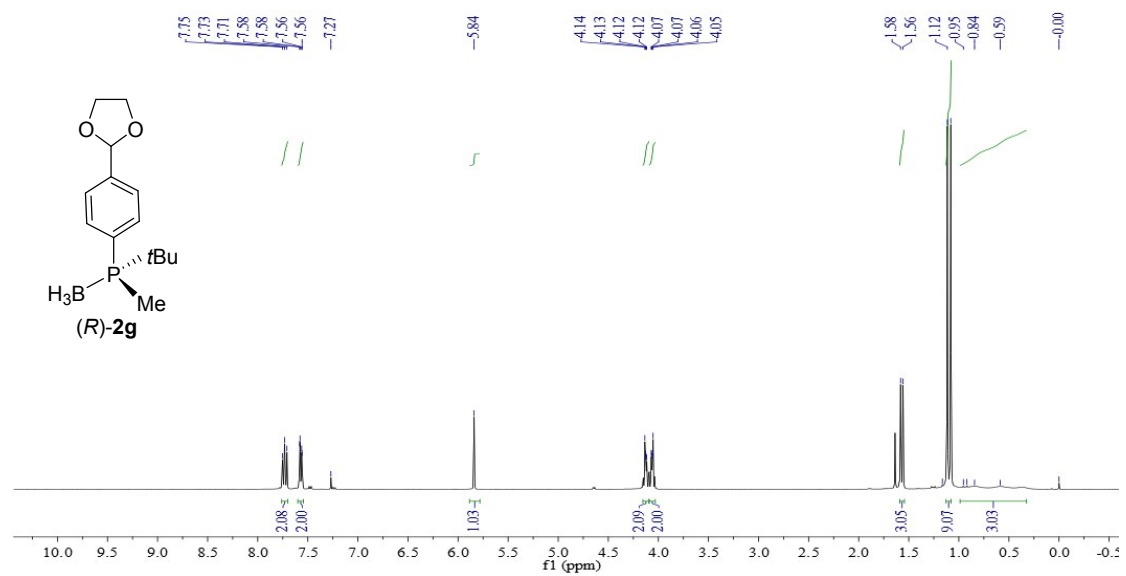

**Figure S19.**  $^1\text{H}$  NMR spectrum of (R)-2g in  $\text{CDCl}_3$

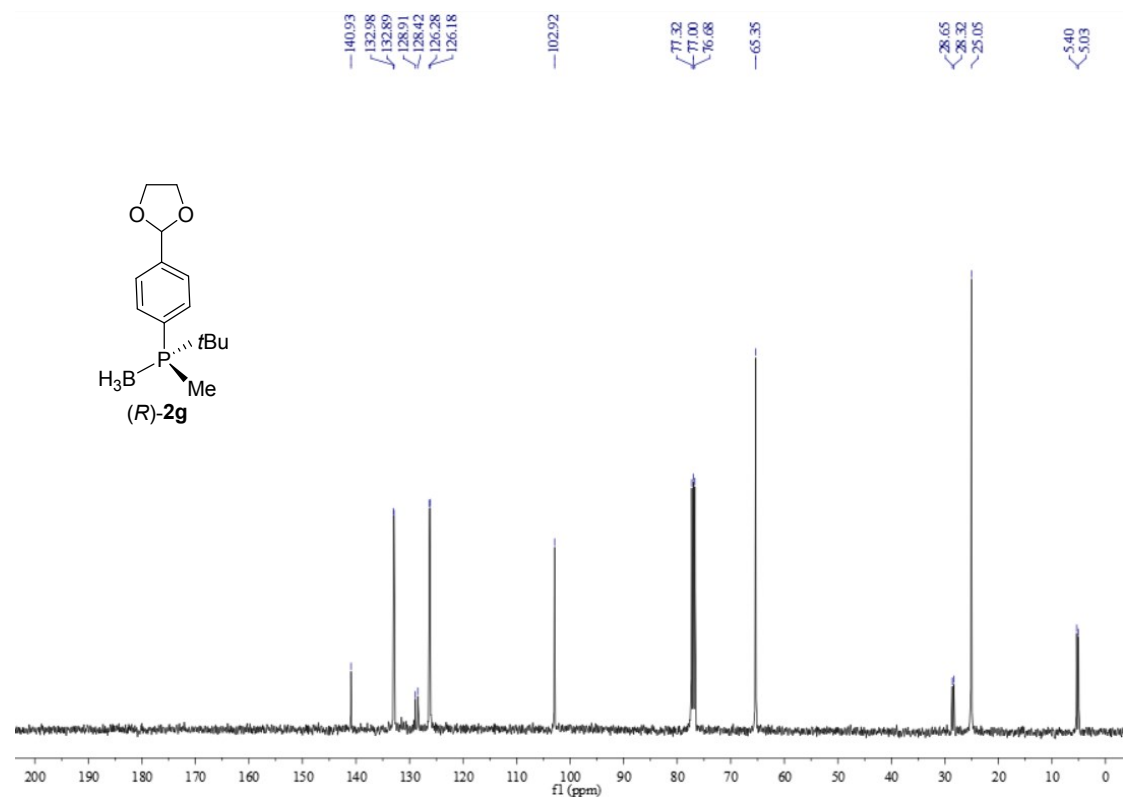

**Figure S20.**  $^{13}\text{C}$  NMR spectrum of (R)-2g in  $\text{CDCl}_3$

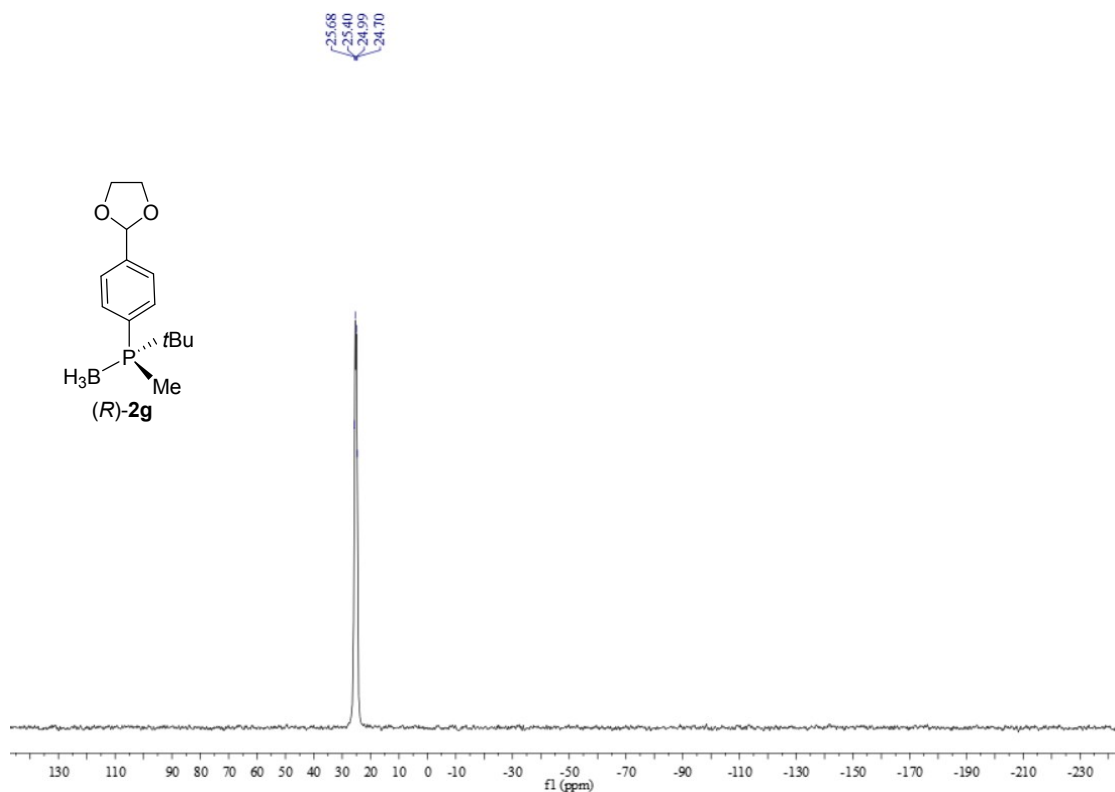

Figure S21. <sup>31</sup>P NMR spectrum of (R)-2g in CDCl<sub>3</sub>

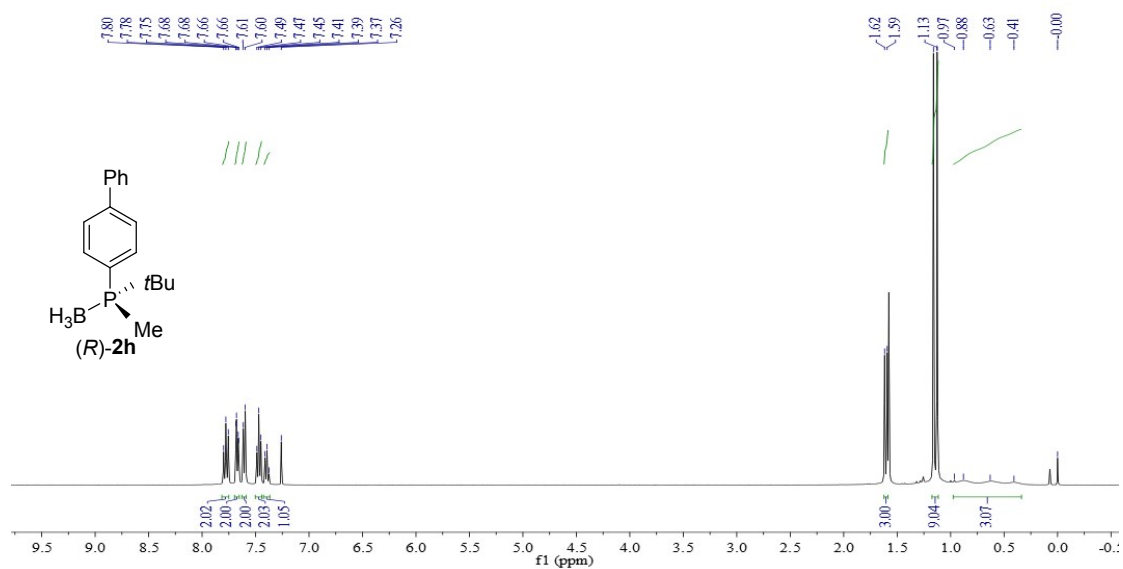

Figure S22. <sup>1</sup>H NMR spectrum of (R)-2h in CDCl<sub>3</sub>

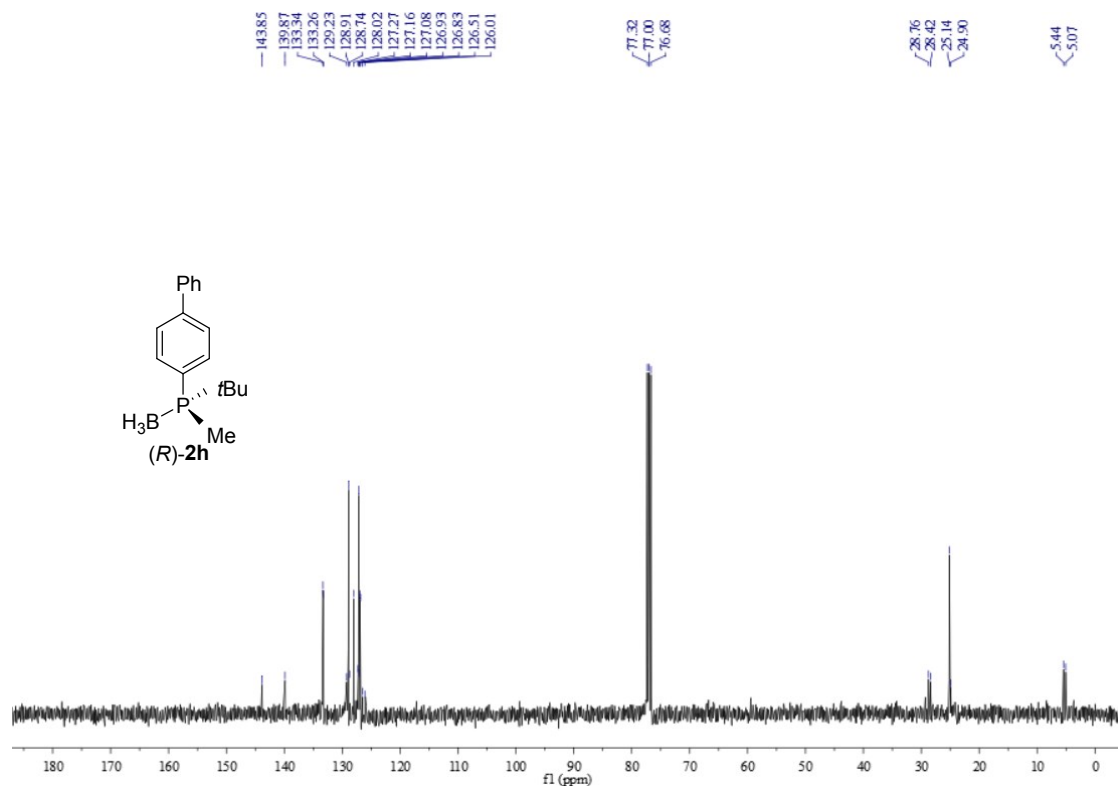

Figure S23. <sup>13</sup>C NMR spectrum of *(R)*-**2h** in CDCl<sub>3</sub>

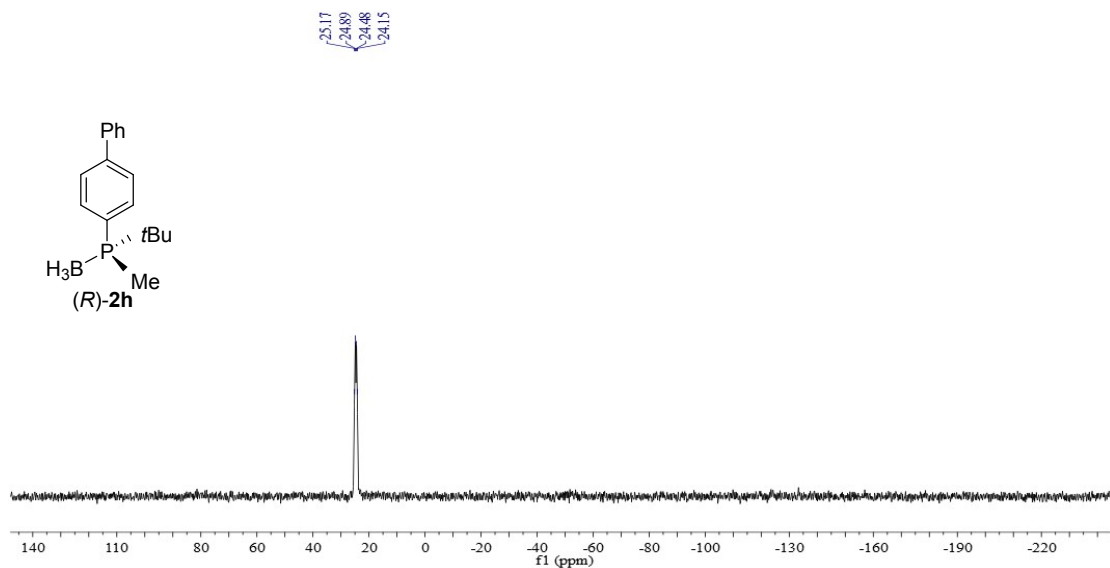

Figure S24. <sup>31</sup>P NMR spectrum of *(R)*-**2h** in CDCl<sub>3</sub>

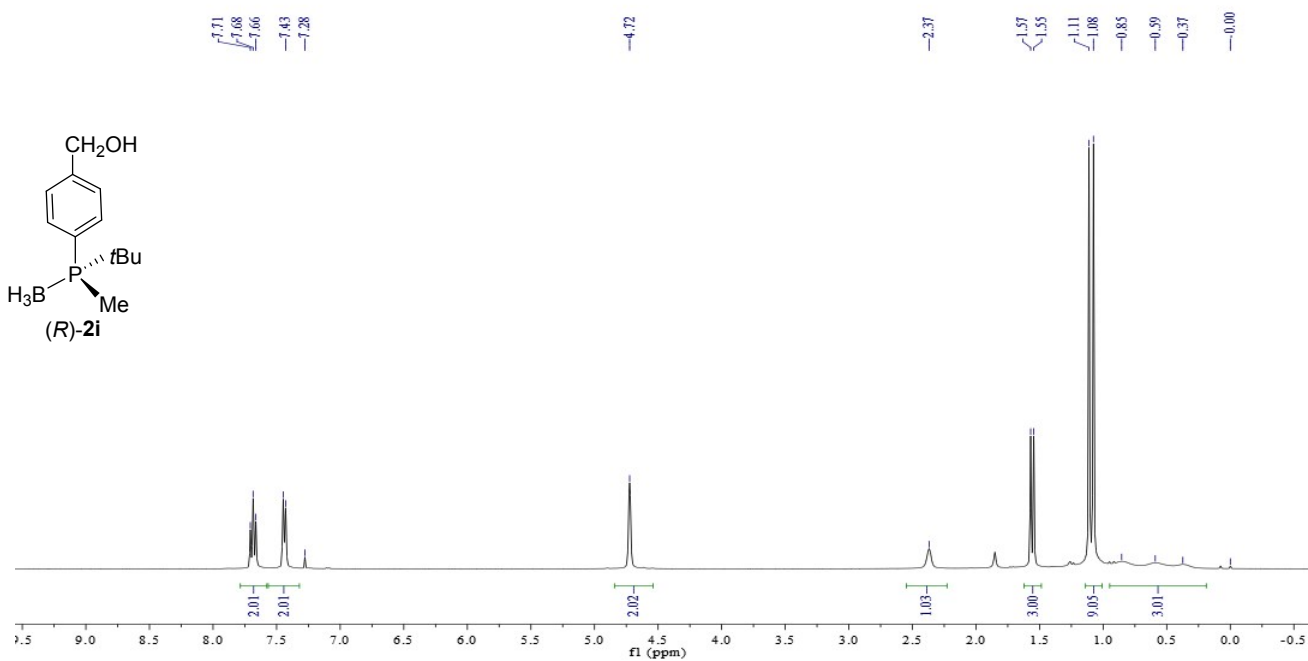

Figure S25. <sup>1</sup>H NMR spectrum of (R)-2i in CDCl<sub>3</sub>

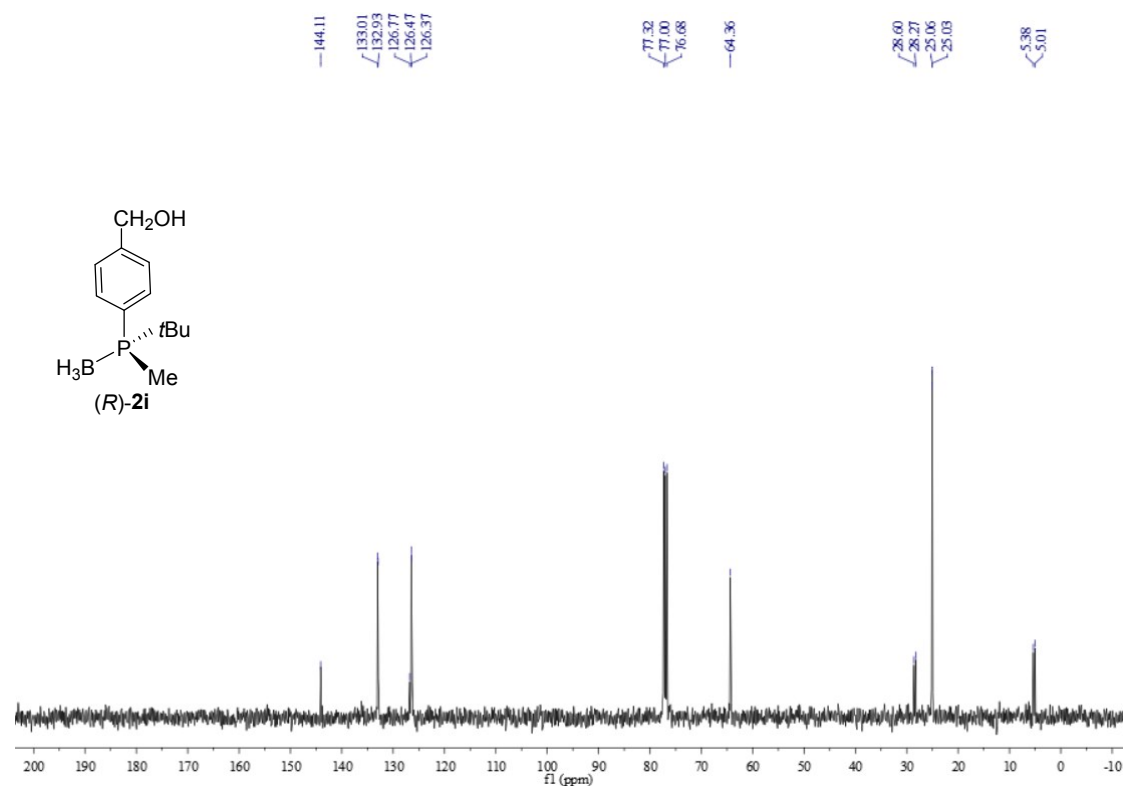

Figure S26. <sup>13</sup>C NMR spectrum of (R)-2i in CDCl<sub>3</sub>

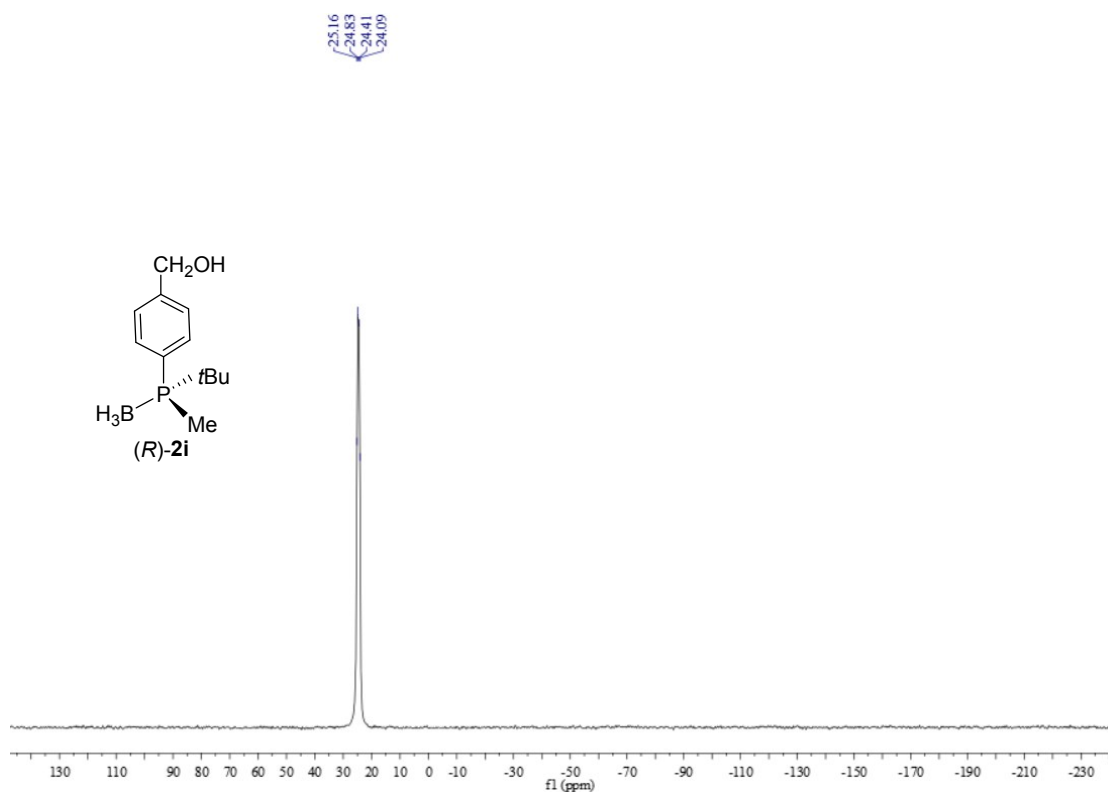

Figure S27.  $^{31}\text{P}$  NMR spectrum of (R)-2i in  $\text{CDCl}_3$

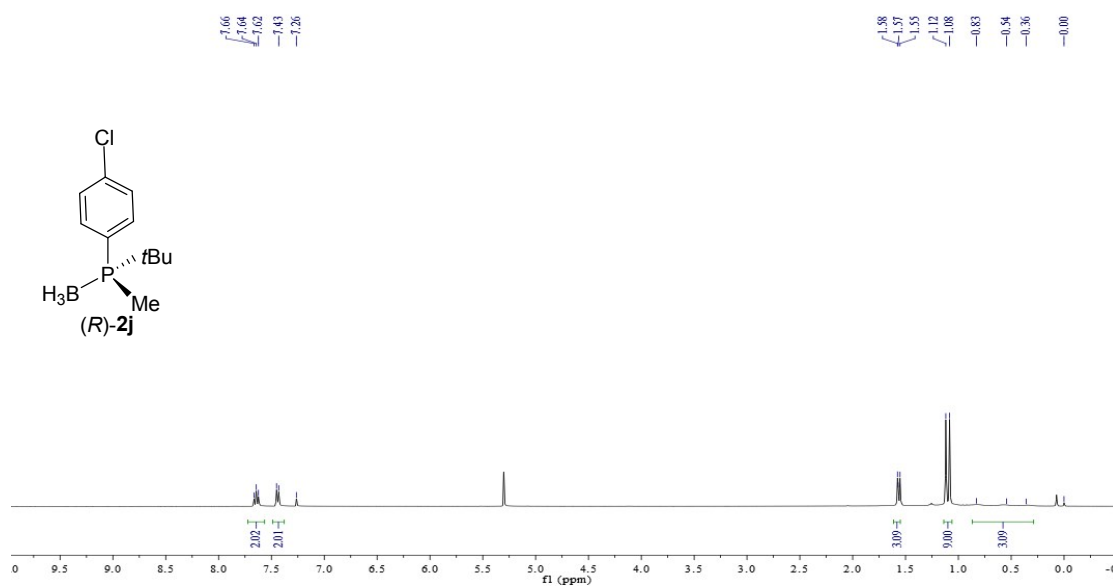

Figure S28.  $^1\text{H}$  NMR spectrum of (R)-2j in  $\text{CDCl}_3$

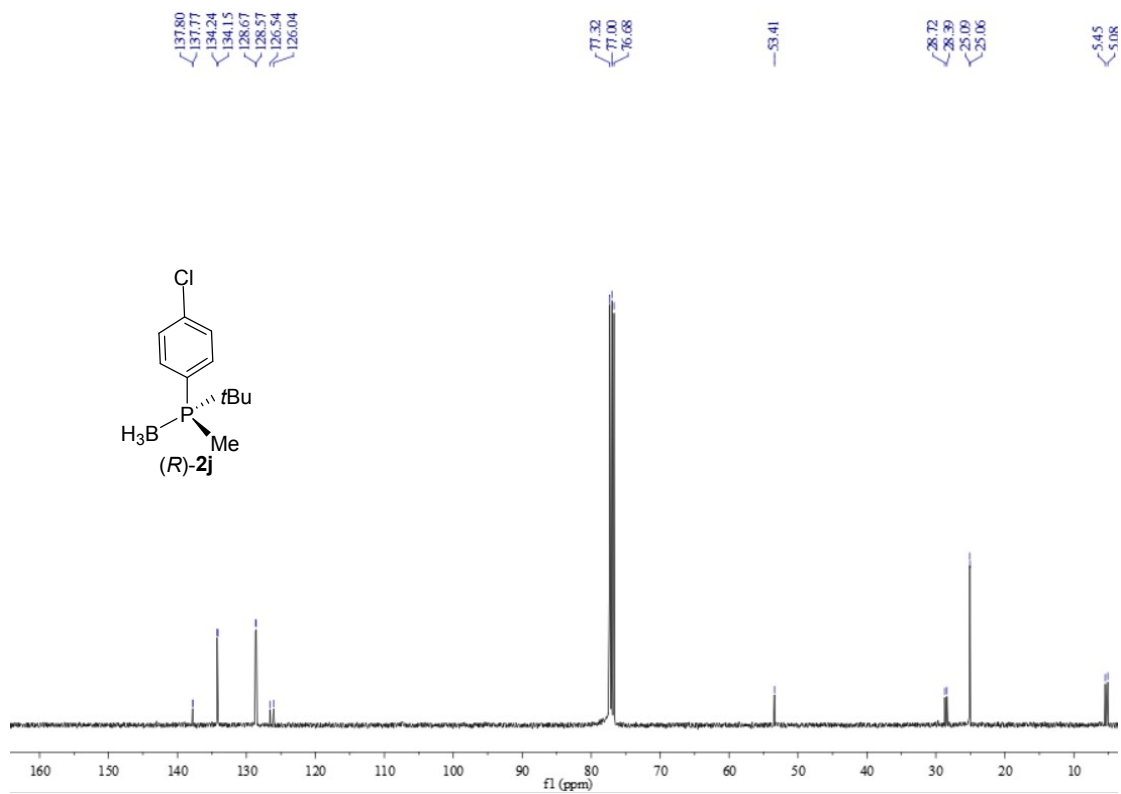

Figure S29.  $^{13}\text{C}$  NMR spectrum of (*R*)-**2j** in  $\text{CDCl}_3$

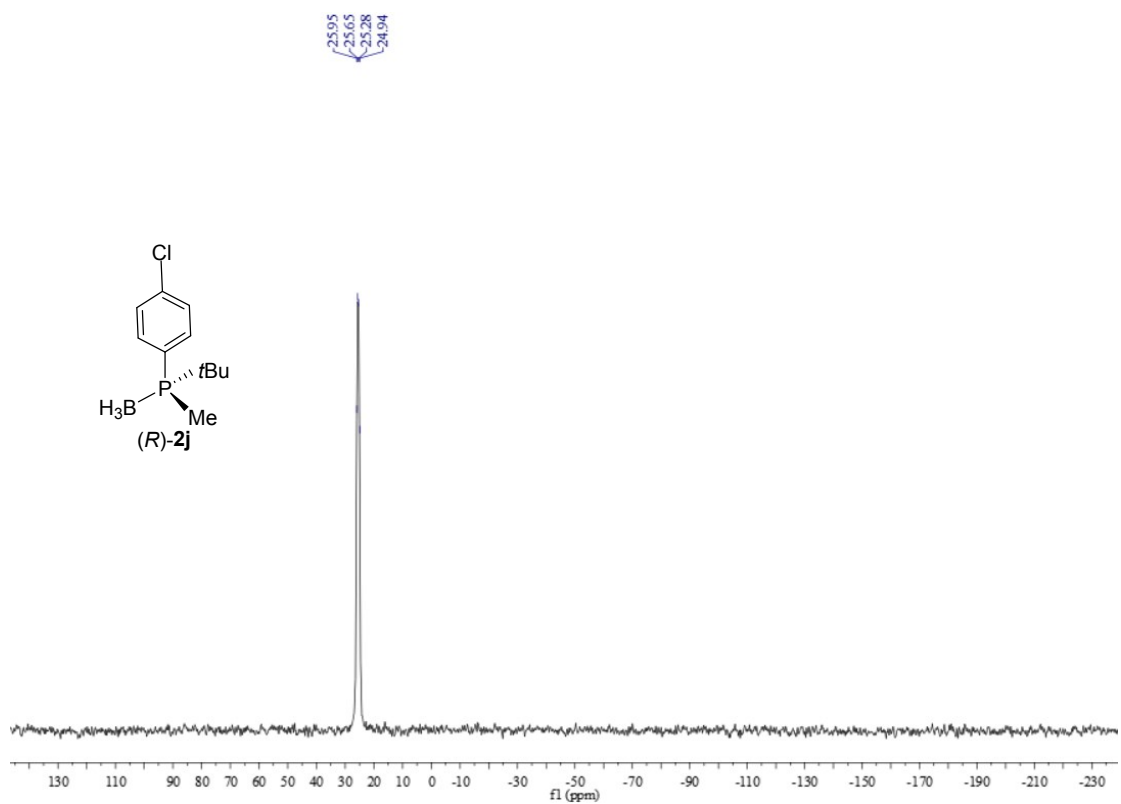

Figure S30.  $^{31}\text{P}$  NMR spectrum of (*R*)-**2j** in  $\text{CDCl}_3$

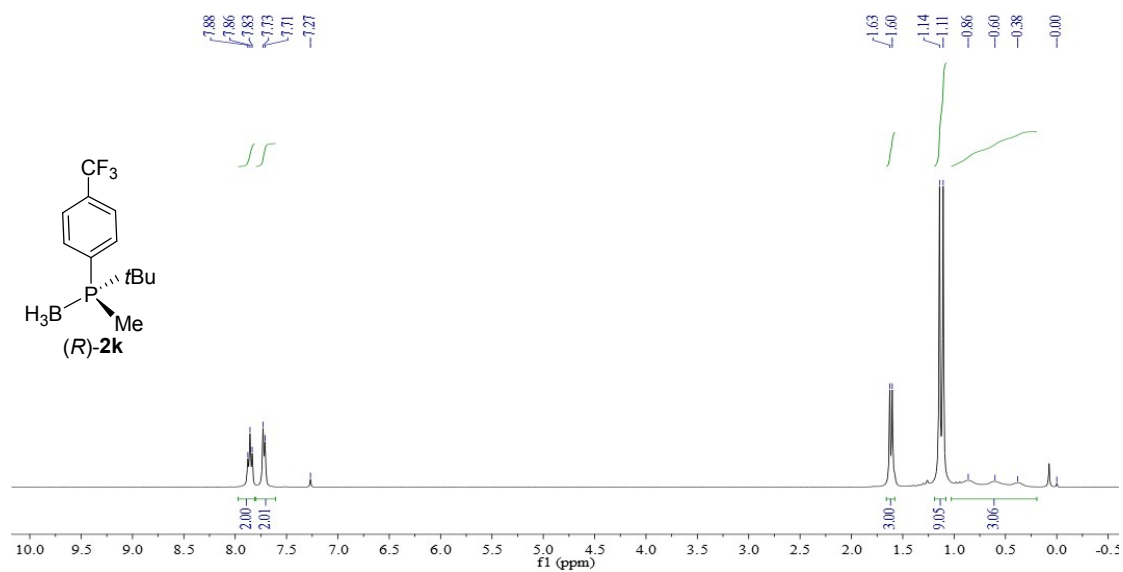

Figure S31. <sup>1</sup>H NMR spectrum of (R)-2k in CDCl<sub>3</sub>

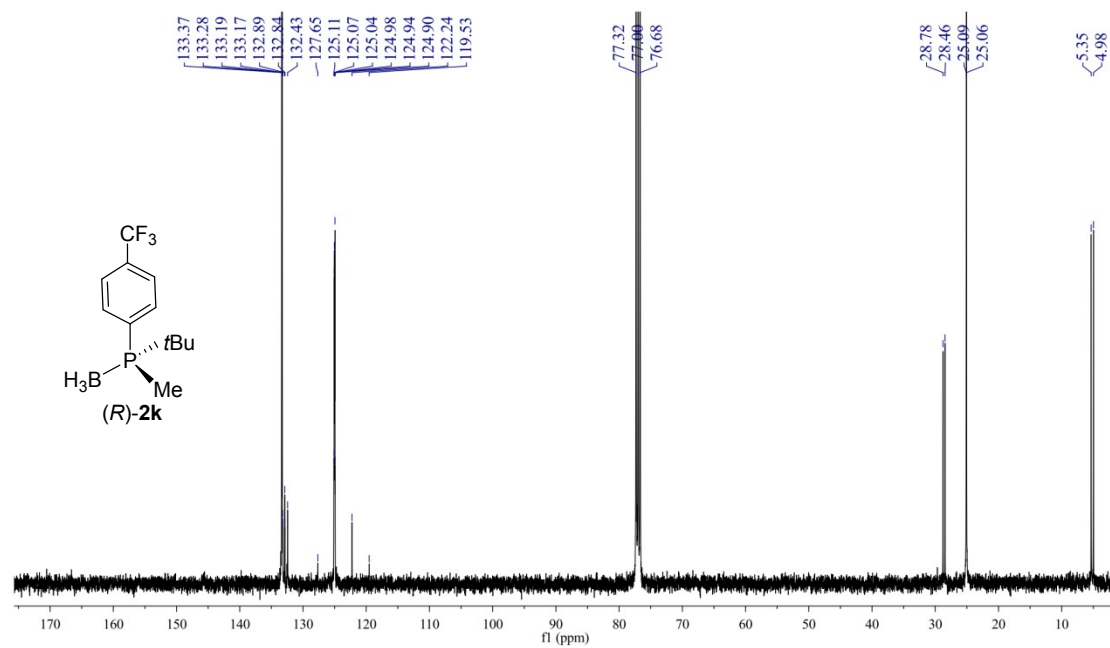

Figure S32. <sup>13</sup>C NMR spectrum of (R)-2k in CDCl<sub>3</sub>



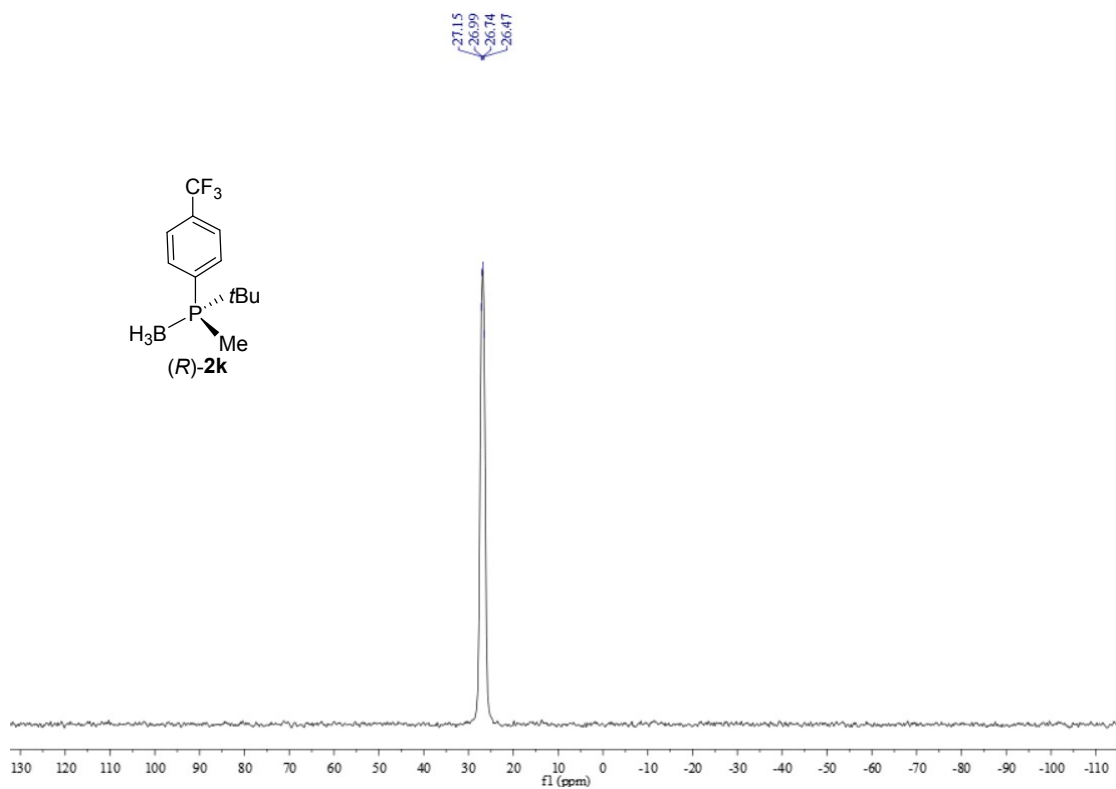

Figure S33. <sup>31</sup>P NMR spectrum of (R)-2k in CDCl<sub>3</sub>

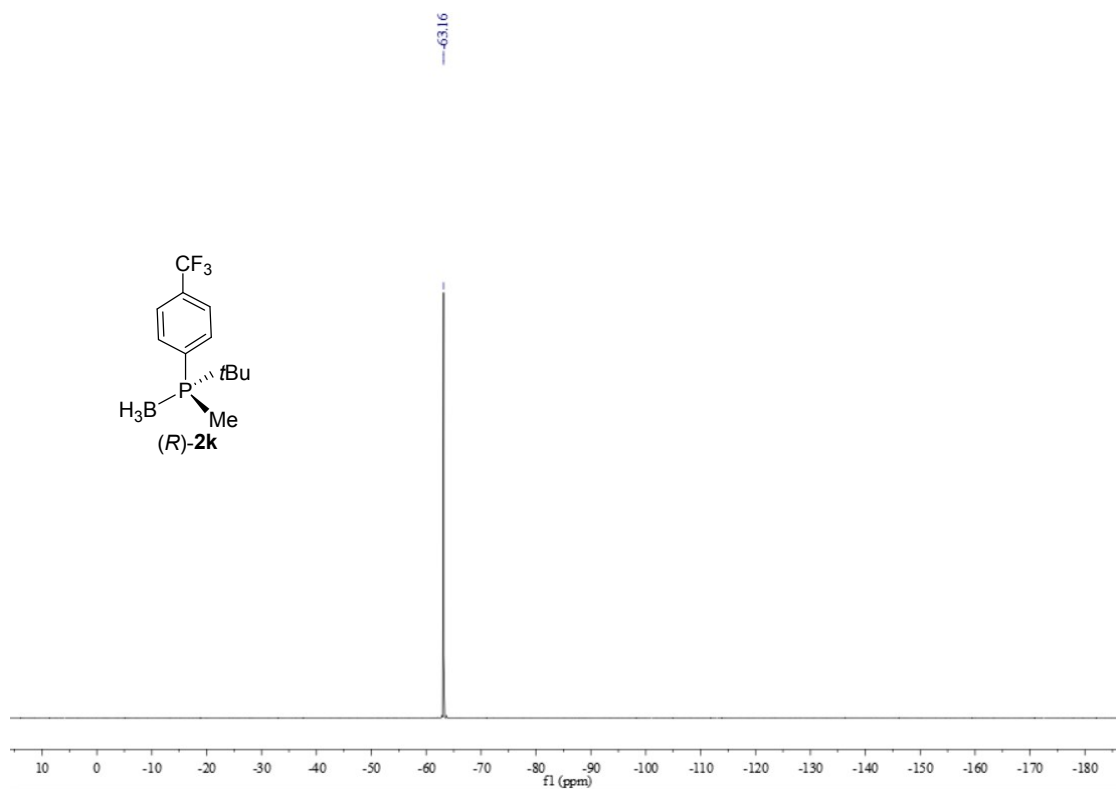

Figure S34. <sup>19</sup>F NMR spectrum of (R)-2k in CDCl<sub>3</sub>

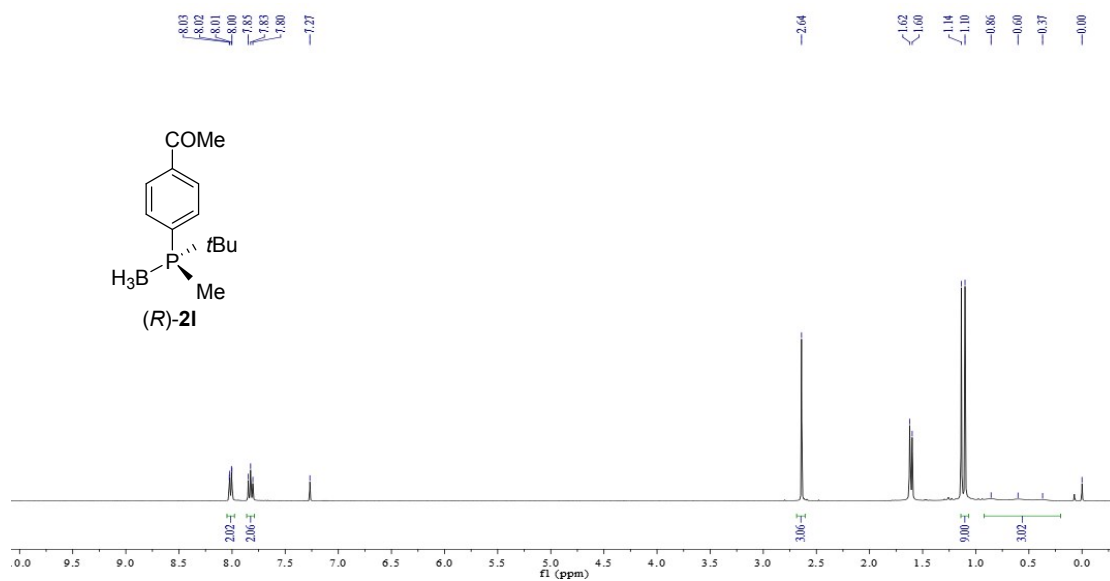

Figure S35. <sup>1</sup>H NMR spectrum of (R)-2I in CDCl<sub>3</sub>

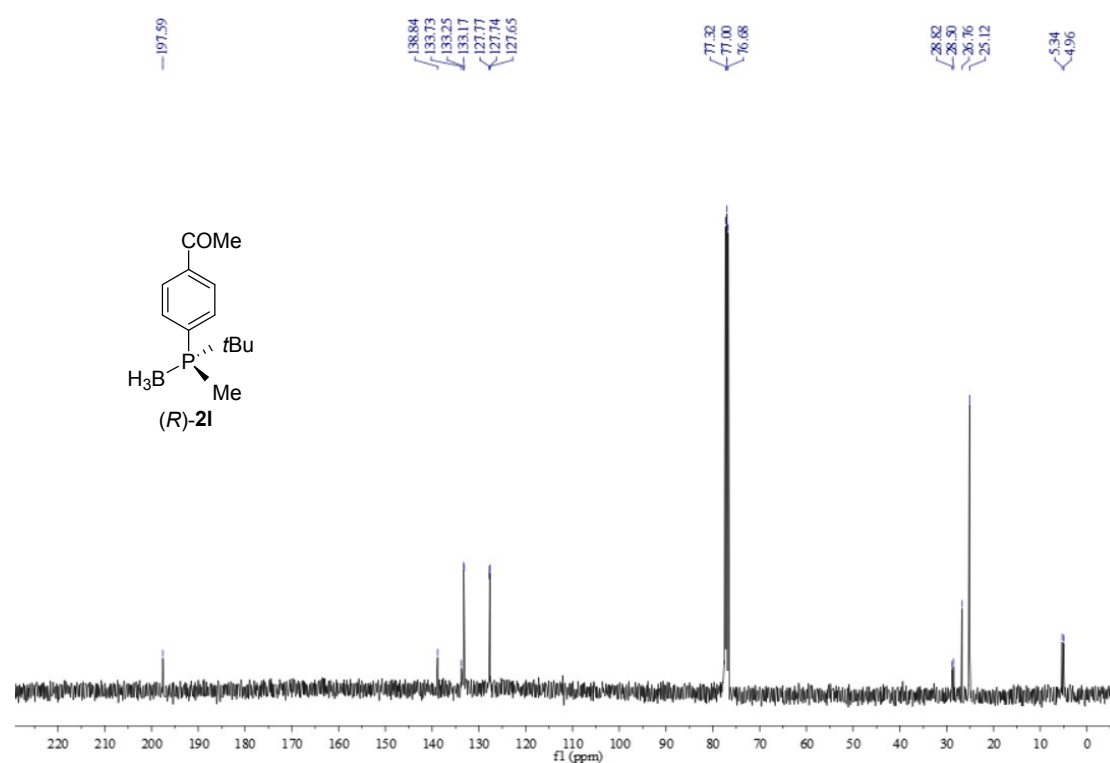

Figure S36. <sup>13</sup>C NMR spectrum of (R)-2I in CDCl<sub>3</sub>

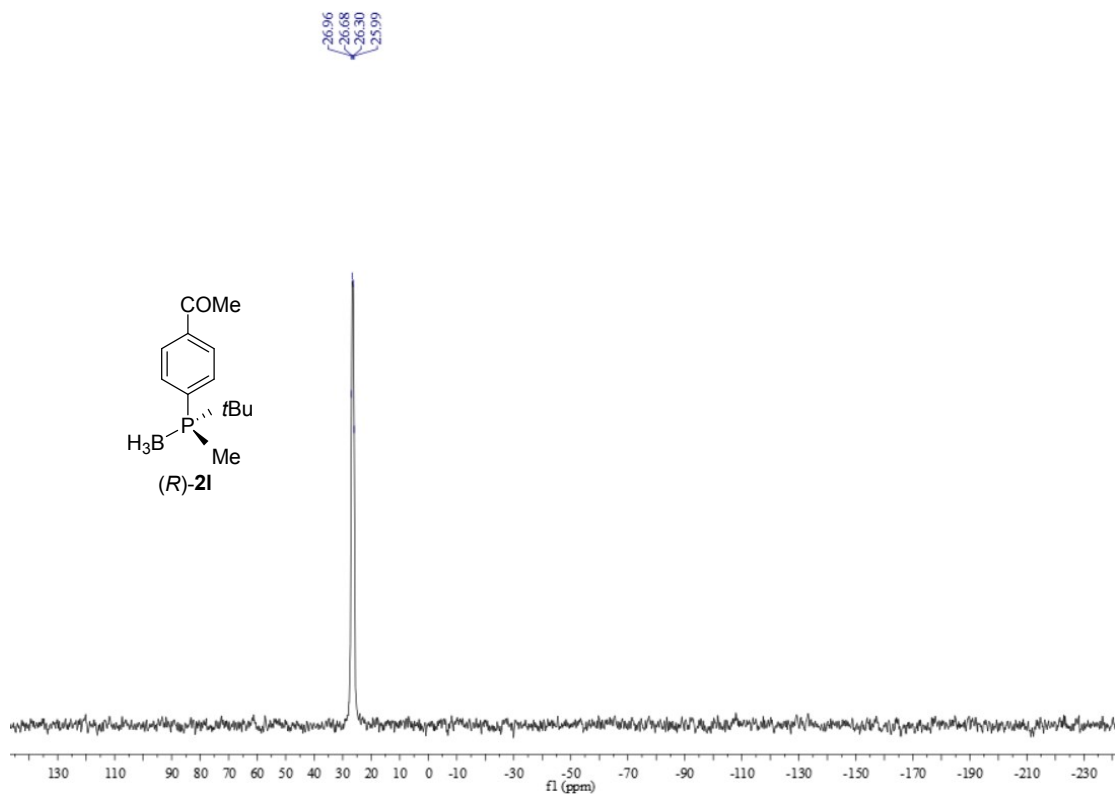

Figure S37. <sup>31</sup>P NMR spectrum of (R)-2l in CDCl<sub>3</sub>

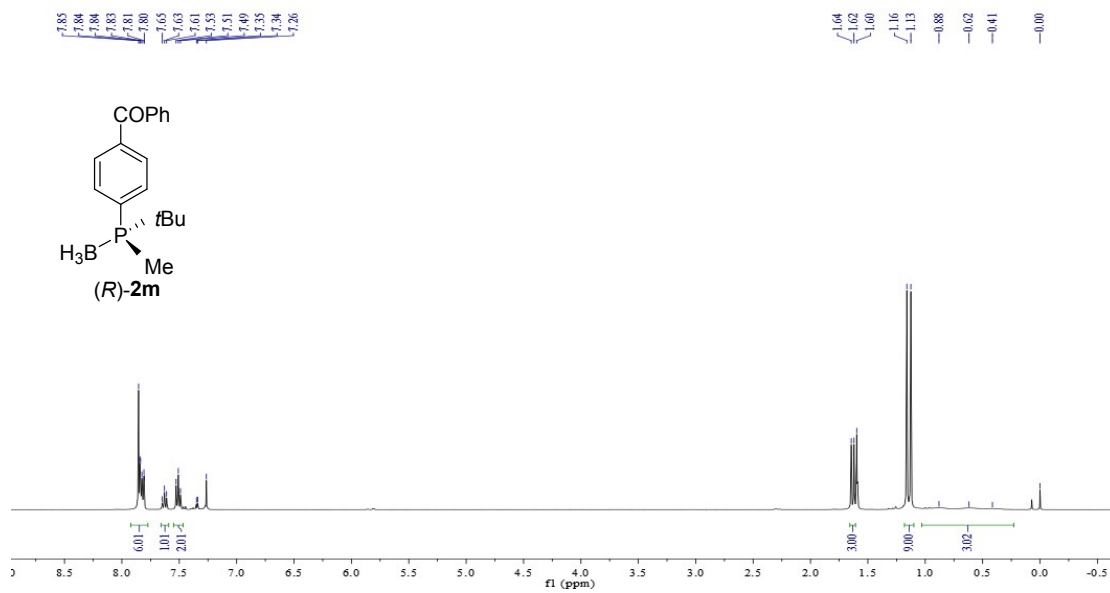

Figure S38. <sup>1</sup>H NMR spectrum of (R)-2m in CDCl<sub>3</sub>

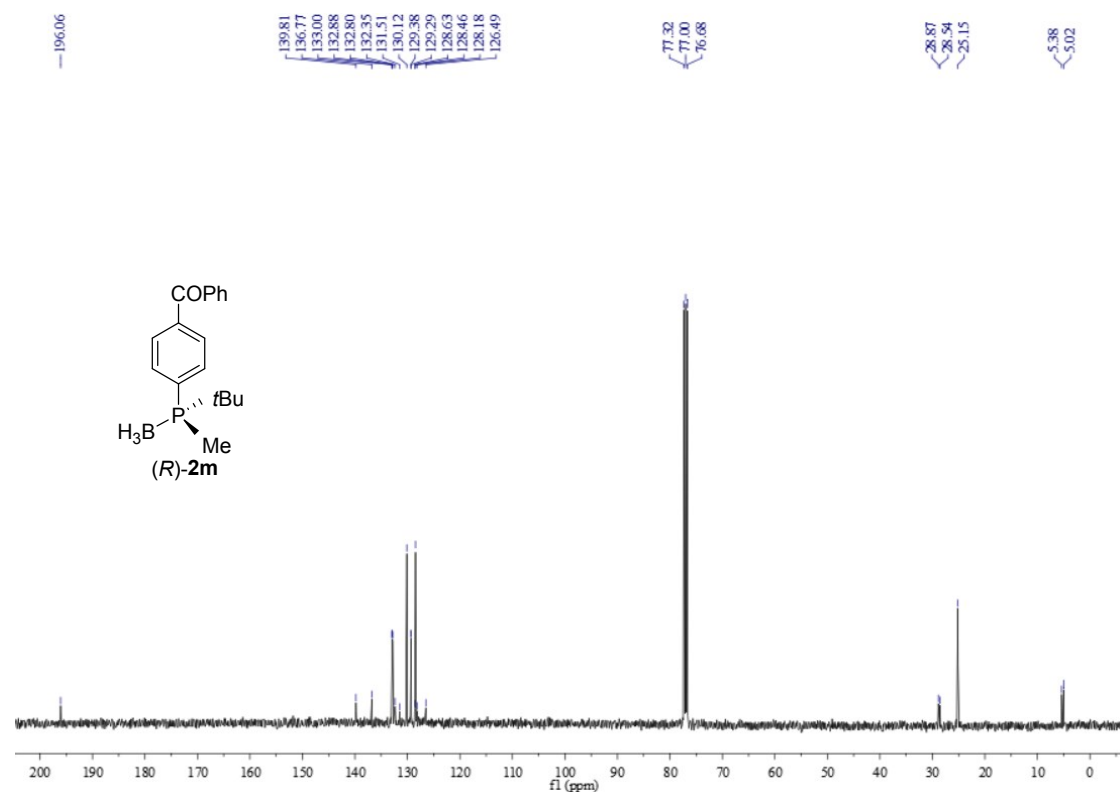

Figure S39.  $^{13}\text{C}$  NMR spectrum of (*R*)-**2m** in  $\text{CDCl}_3$

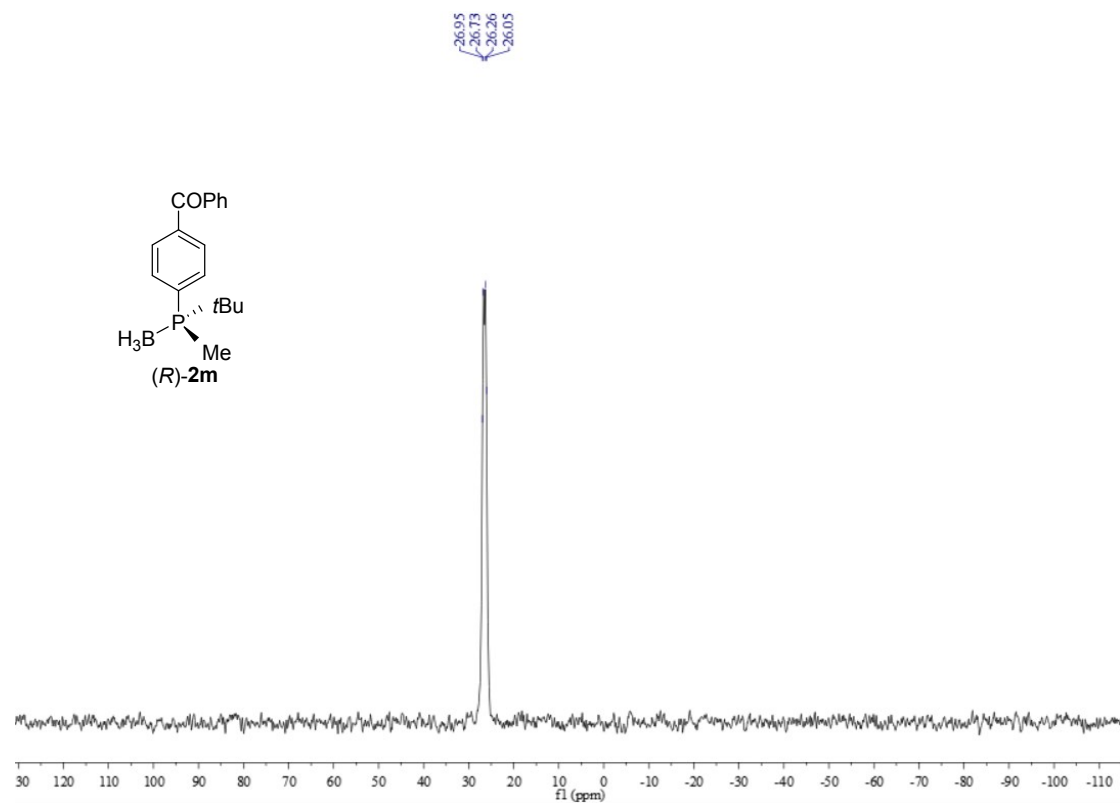

Figure S40.  $^{31}\text{P}$  NMR spectrum of (*R*)-**2m** in  $\text{CDCl}_3$

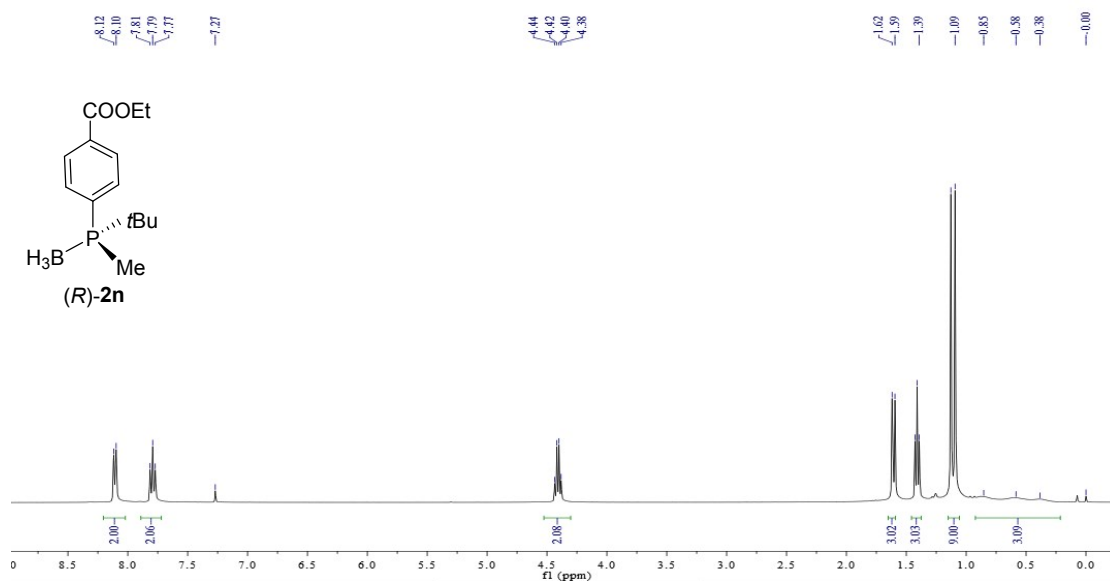

Figure S41. <sup>1</sup>H NMR spectrum of (R)-2n in CDCl<sub>3</sub>

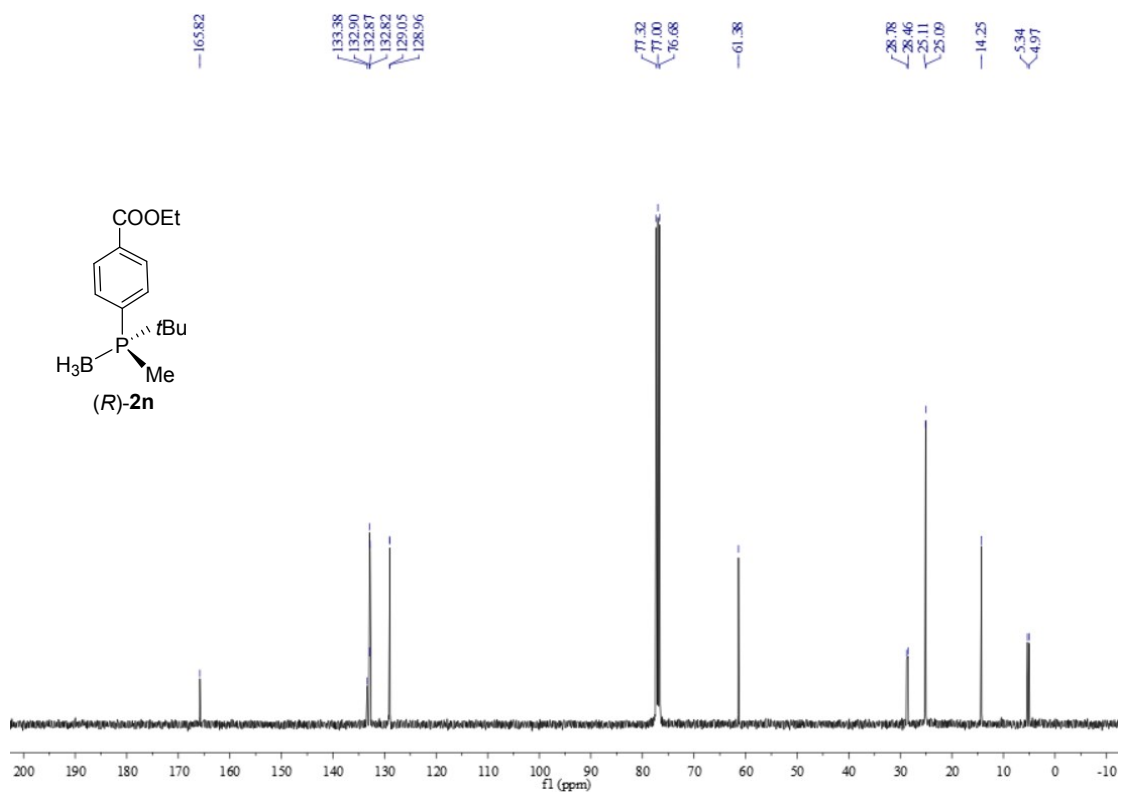

Figure S42. <sup>13</sup>C NMR spectrum of (R)-2n in CDCl<sub>3</sub>

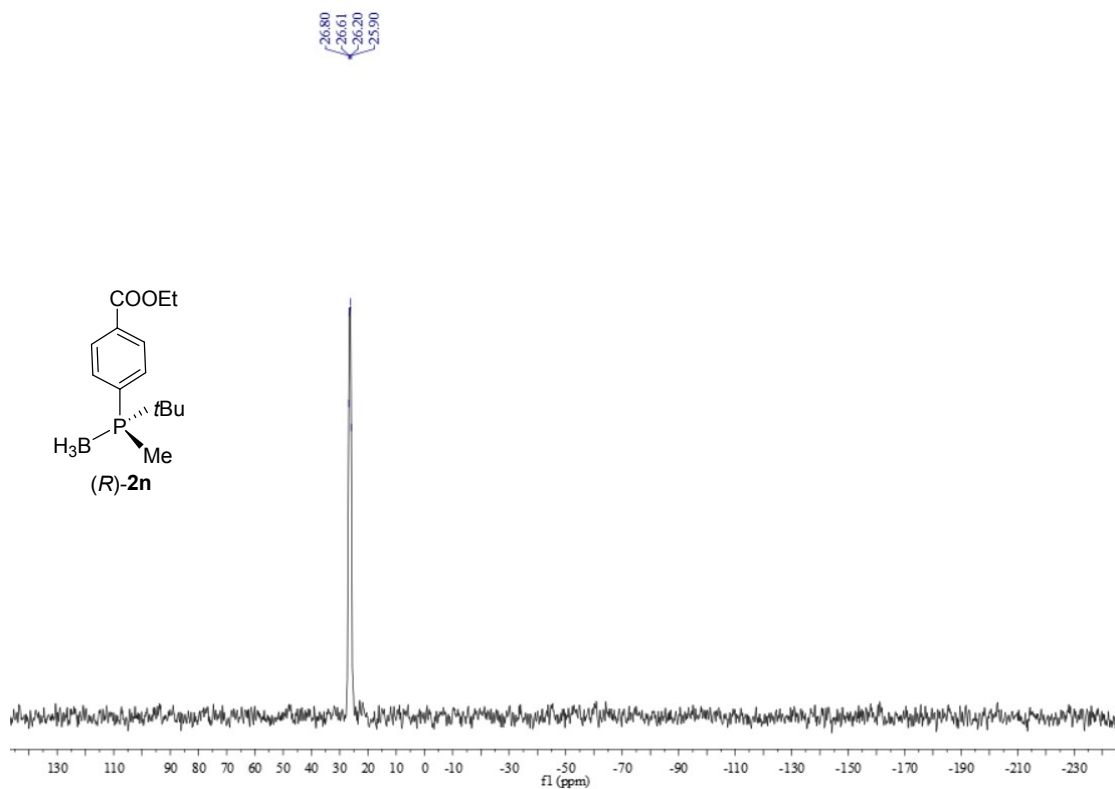

Figure S43. <sup>31</sup>P NMR spectrum of *(R)*-2n in CDCl<sub>3</sub>

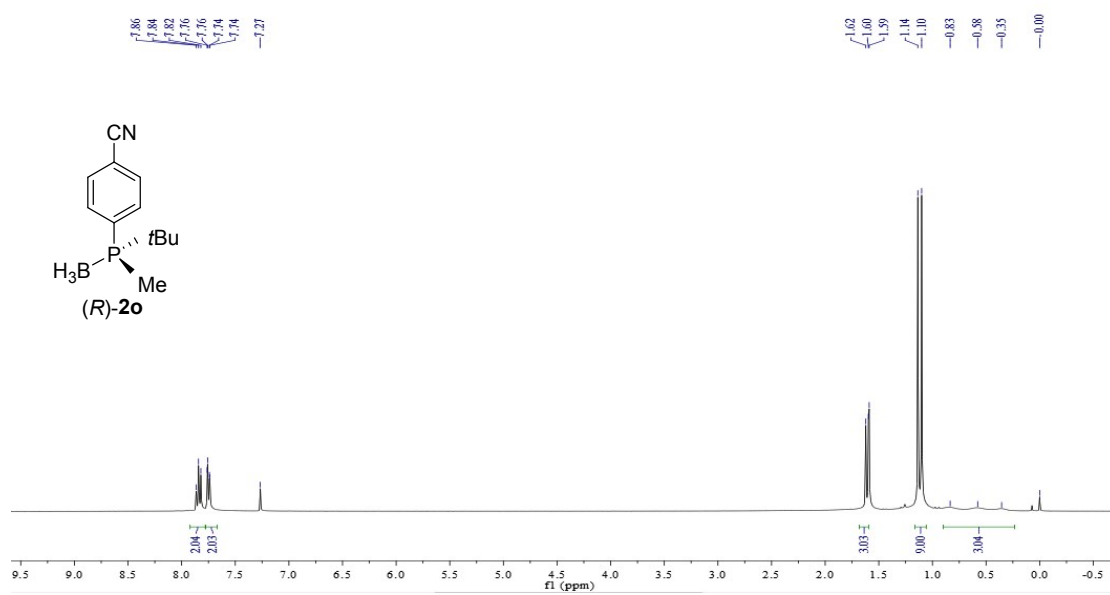

Figure S44. <sup>1</sup>H NMR spectrum of *(R)*-2o in CDCl<sub>3</sub>

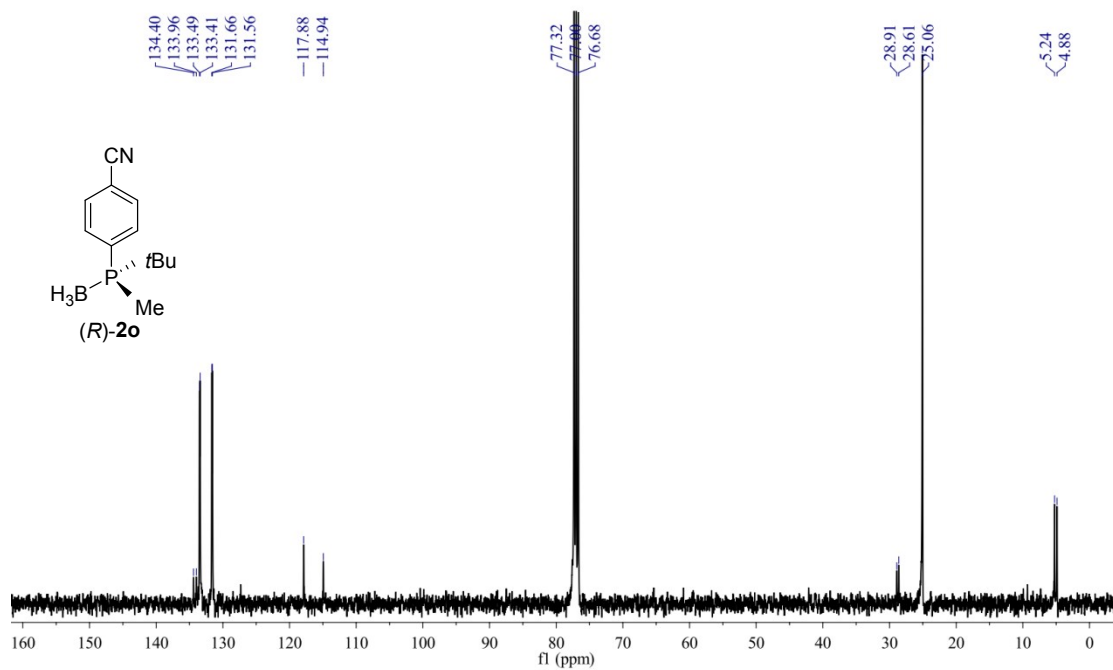

Figure S45. <sup>13</sup>C NMR spectrum of (R)-2o in CDCl<sub>3</sub>

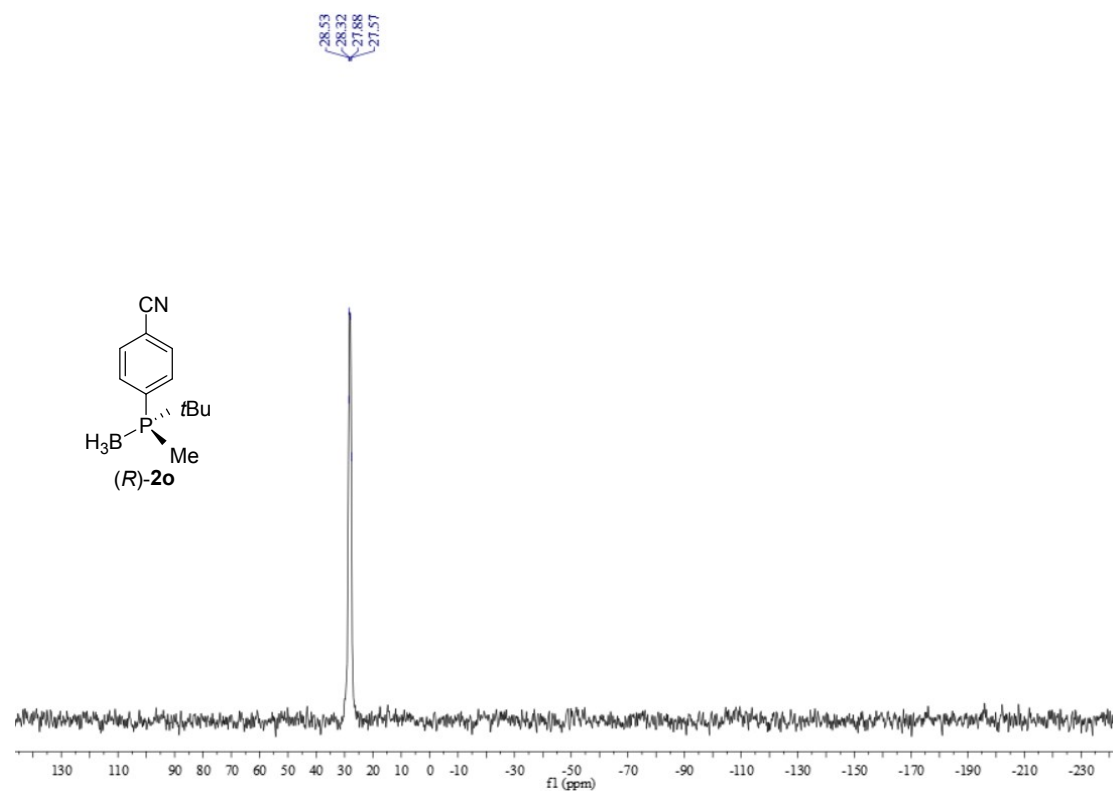

Figure S46. <sup>31</sup>P NMR spectrum of (R)-2o in CDCl<sub>3</sub>

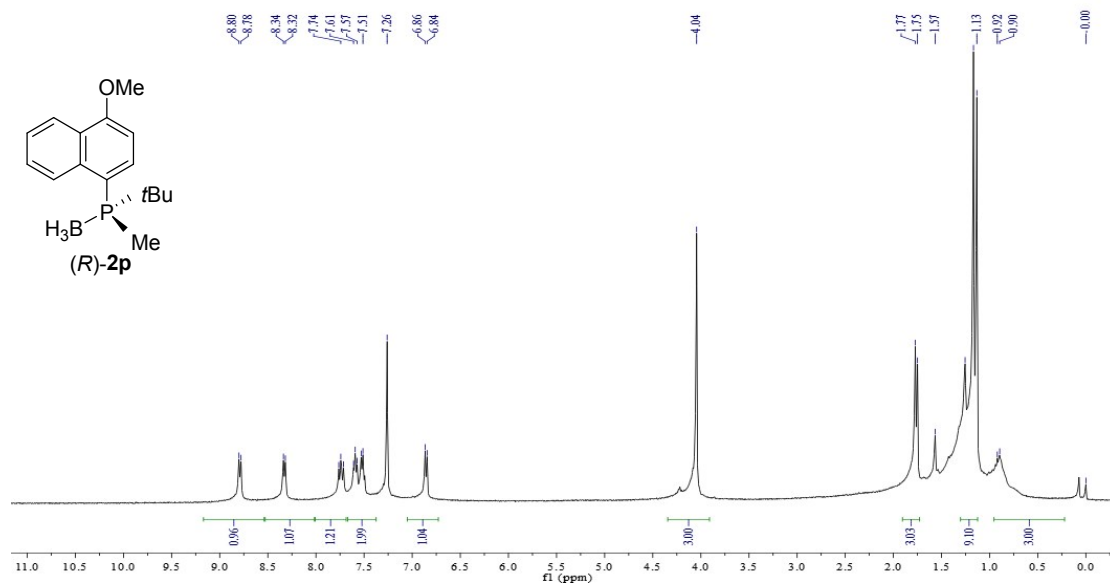

Figure S47. <sup>1</sup>H NMR spectrum of (R)-2p in CDCl<sub>3</sub>

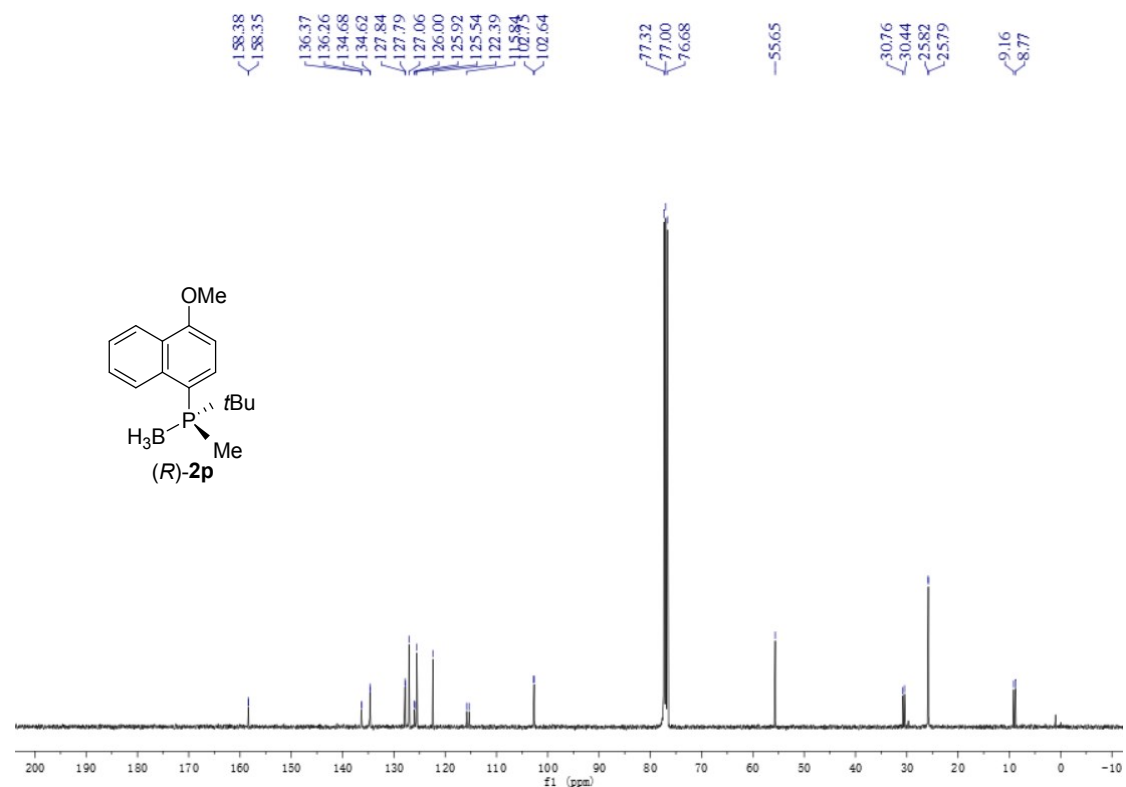

Figure S48. <sup>13</sup>C NMR spectrum of (R)-2p in CDCl<sub>3</sub>



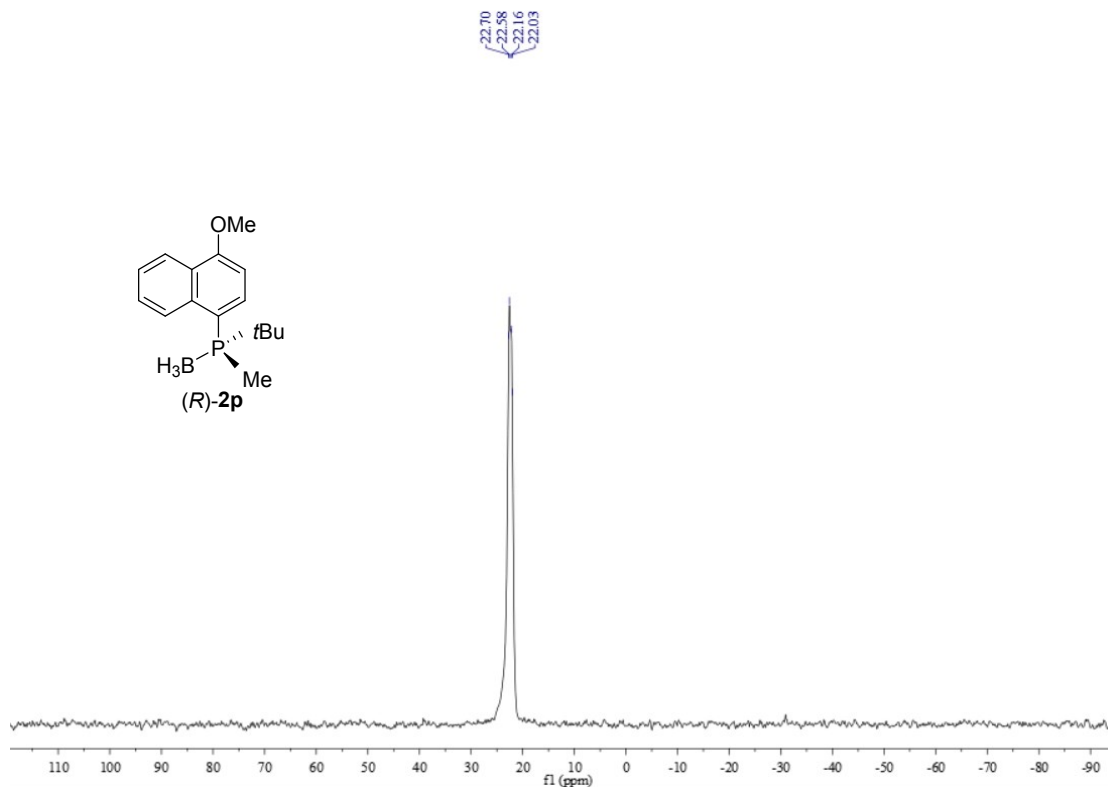

Figure S49. <sup>31</sup>P NMR spectrum of (R)-2p in CDCl<sub>3</sub>

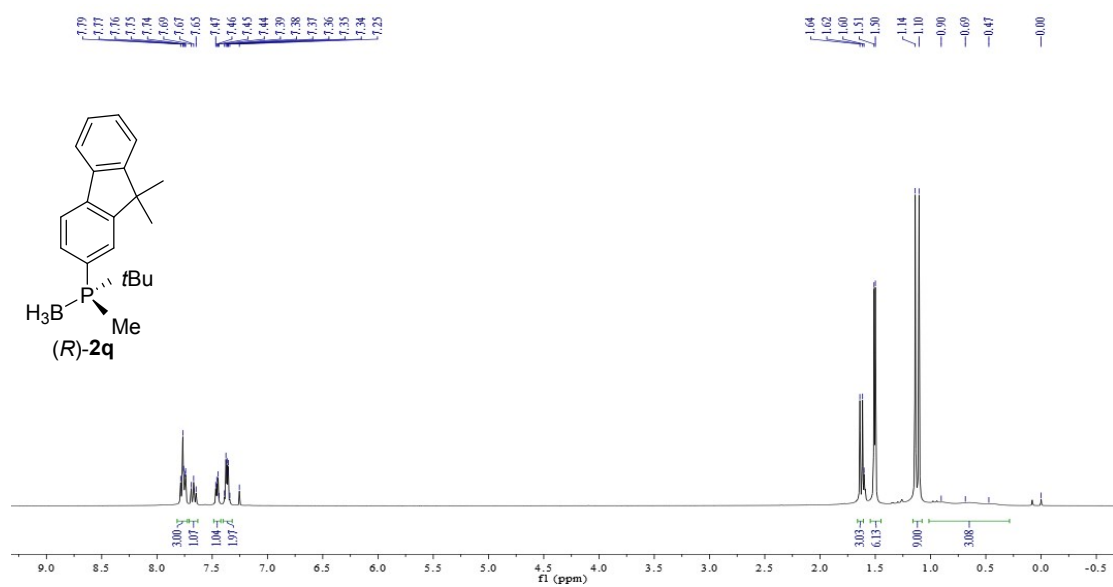

Figure S50. <sup>1</sup>H NMR spectrum of (R)-2q in CDCl<sub>3</sub>

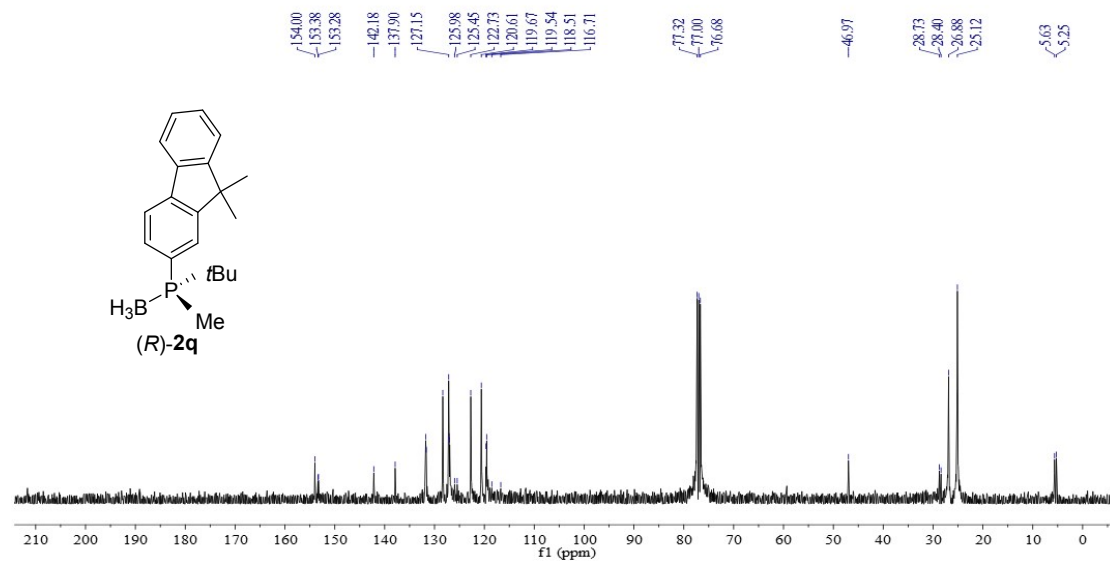

Figure S51.  $^{13}\text{C}$  NMR spectrum of (R)-2q in  $\text{CDCl}_3$

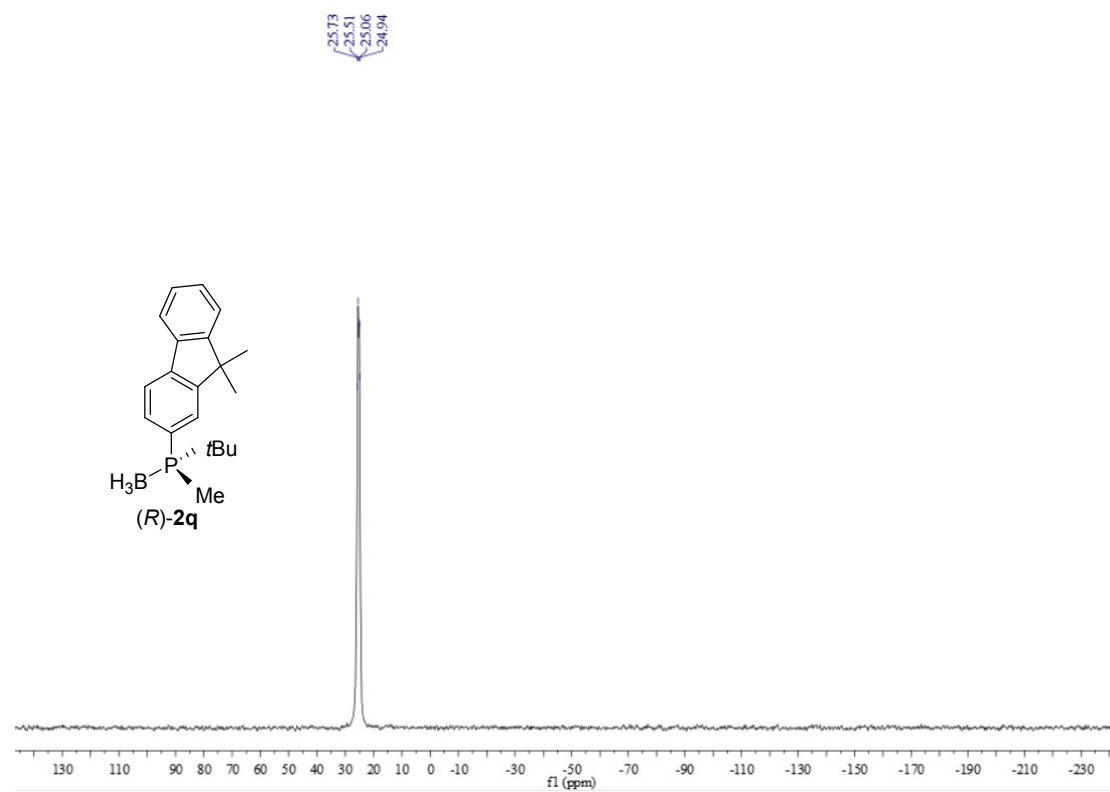

Figure S52.  $^{31}\text{P}$  NMR spectrum of (R)-2q in  $\text{CDCl}_3$

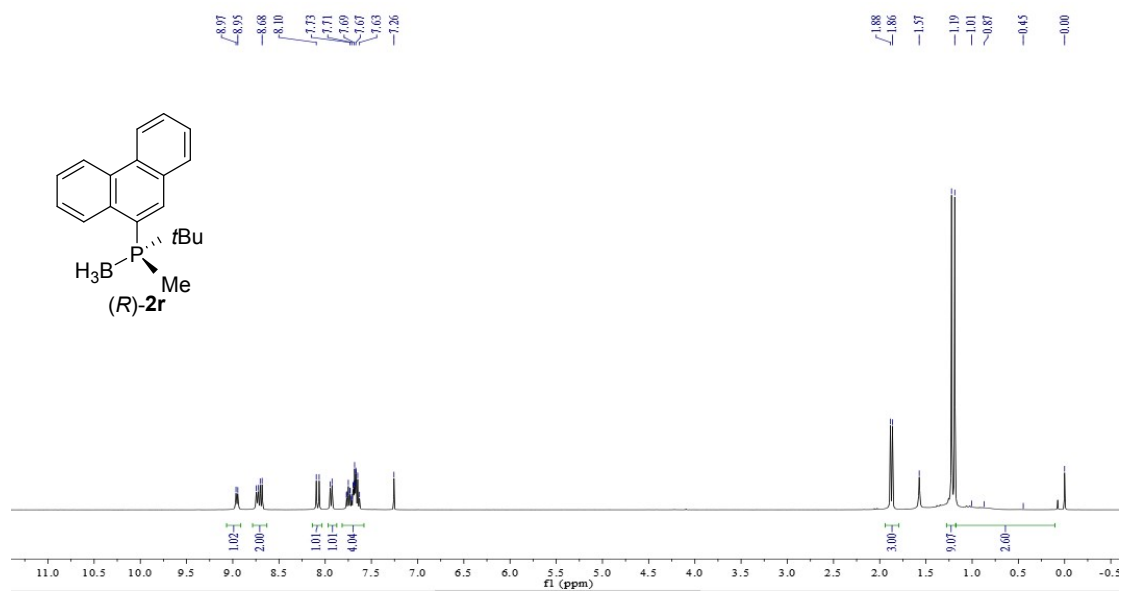

Figure S53. <sup>1</sup>H NMR spectrum of (R)-2r in CDCl<sub>3</sub>

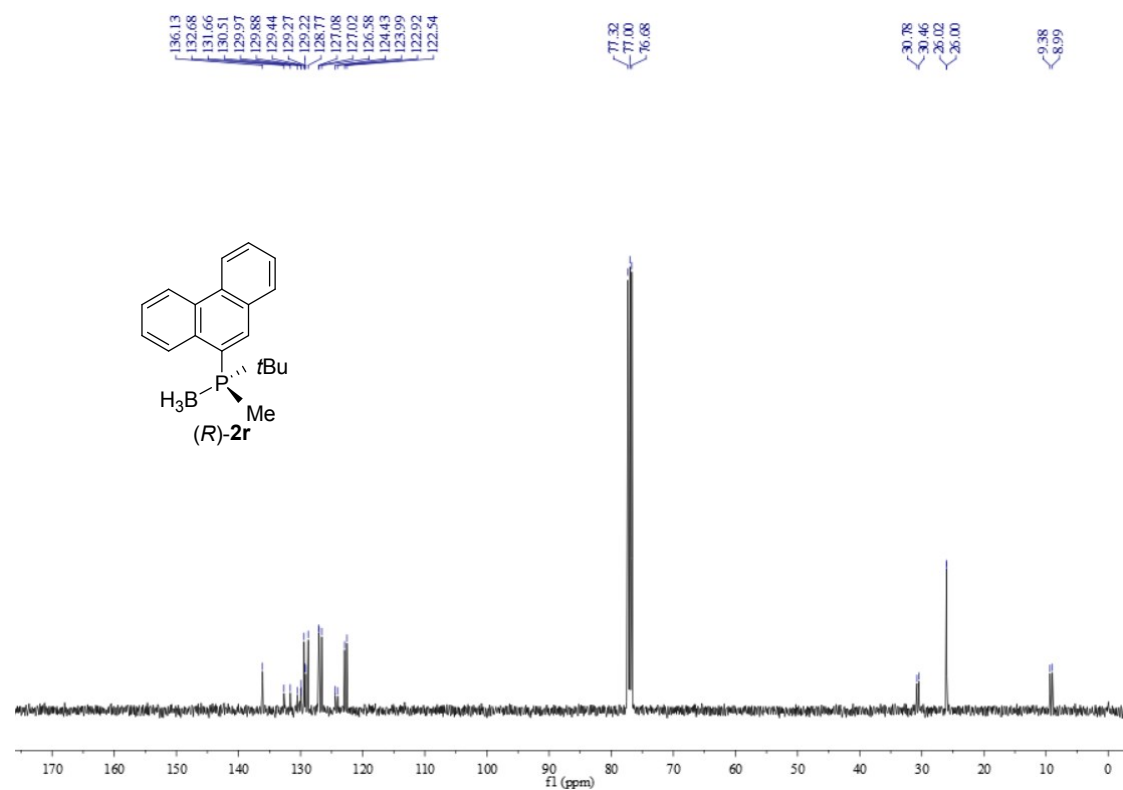

Figure S54. <sup>13</sup>C NMR spectrum of (R)-2r in CDCl<sub>3</sub>

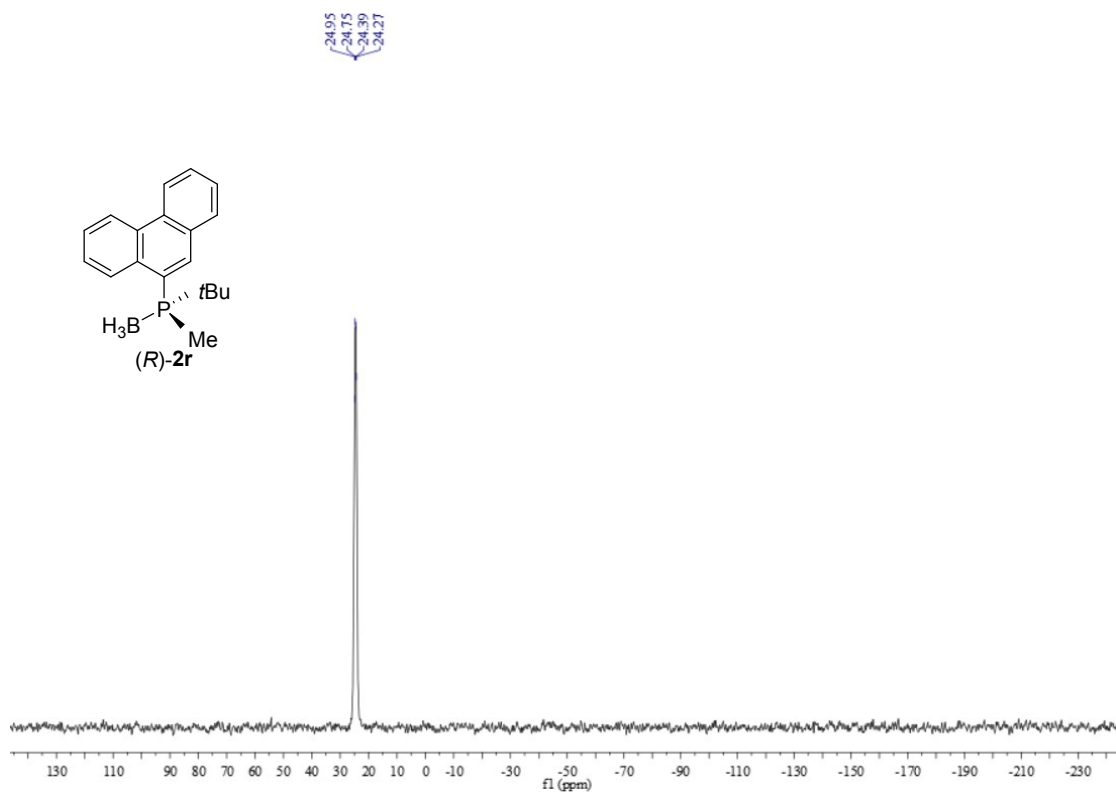

Figure S55. <sup>31</sup>P NMR spectrum of (R)-2r in CDCl<sub>3</sub>

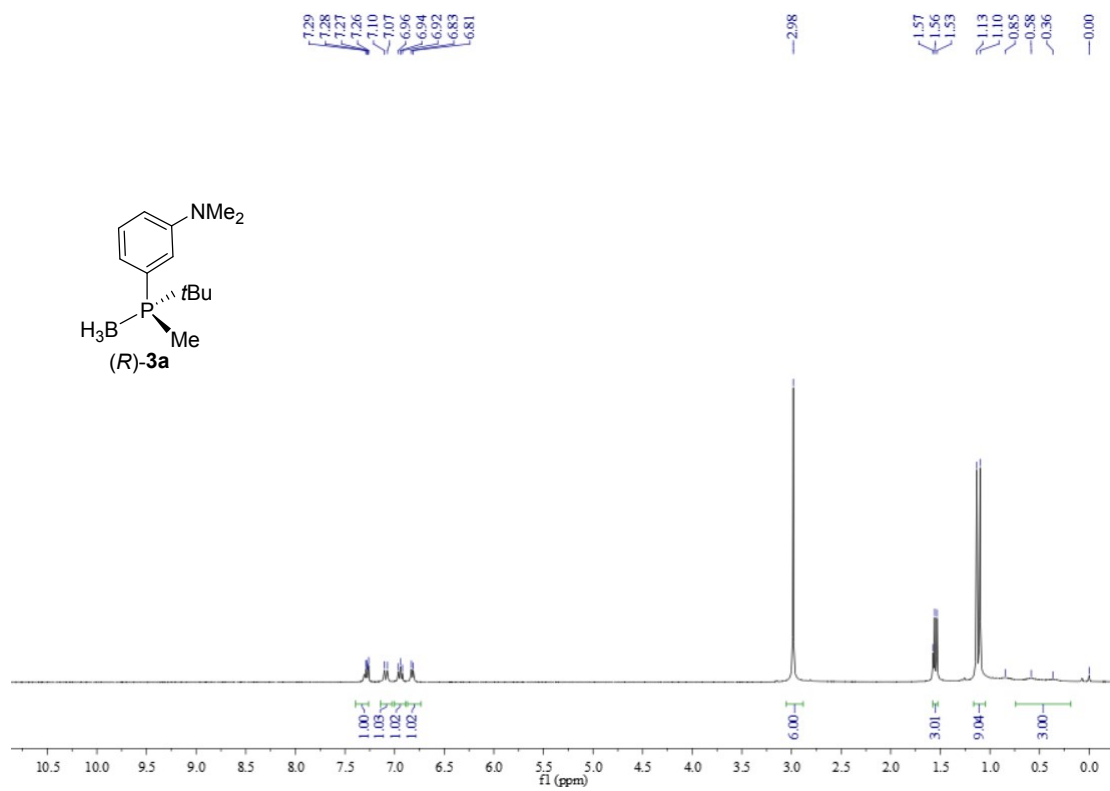

Figure S56. <sup>1</sup>H NMR spectrum of (R)-3a in CDCl<sub>3</sub>

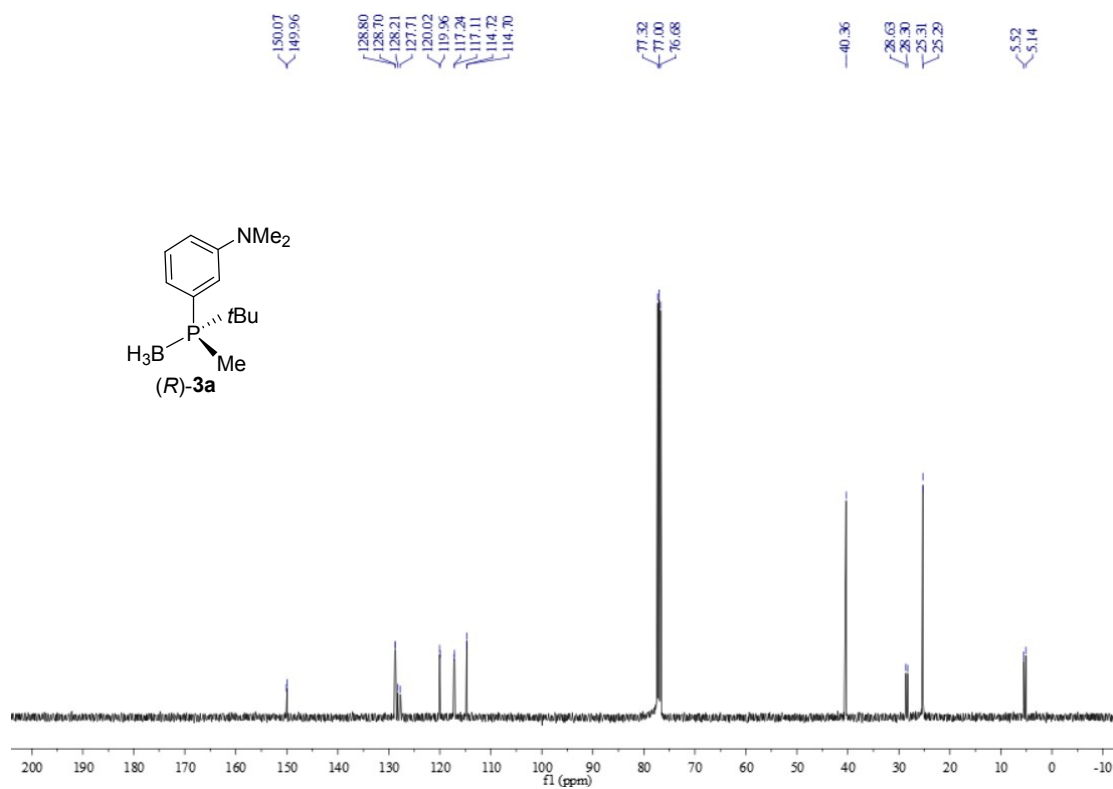

Figure S57. <sup>13</sup>C NMR spectrum of (R)-3a in CDCl<sub>3</sub>

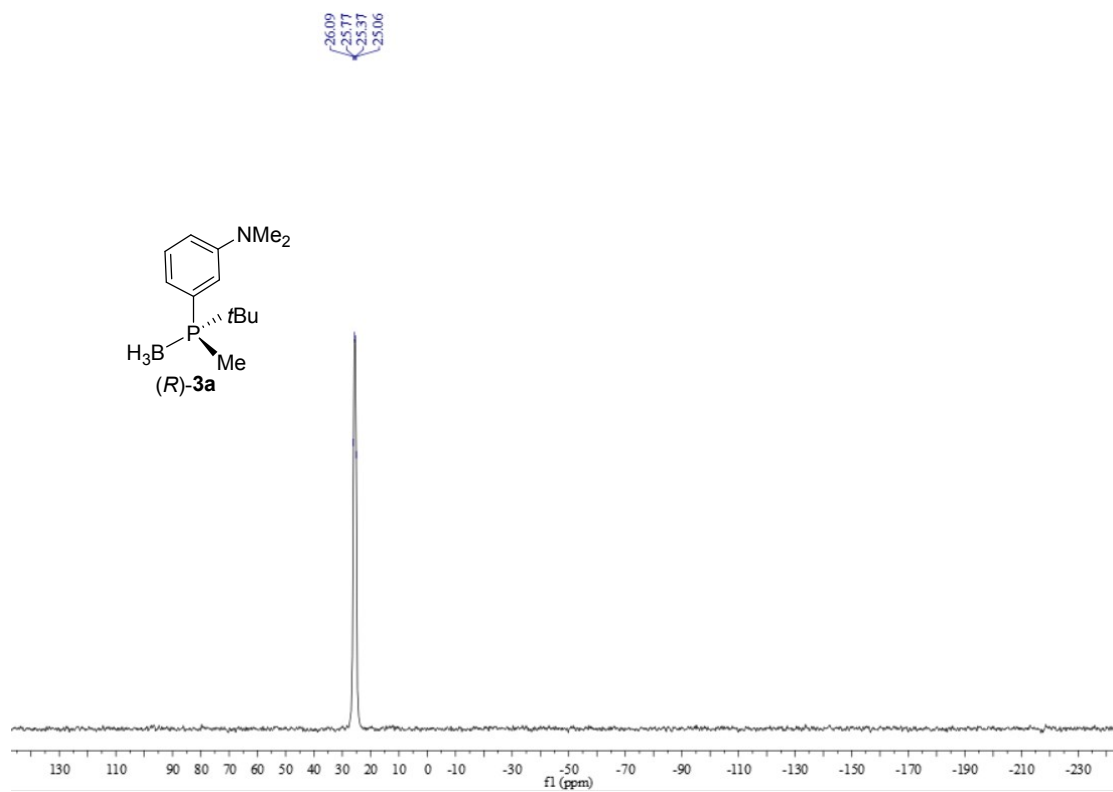

Figure S58. <sup>31</sup>P NMR spectrum of (R)-3a in CDCl<sub>3</sub>

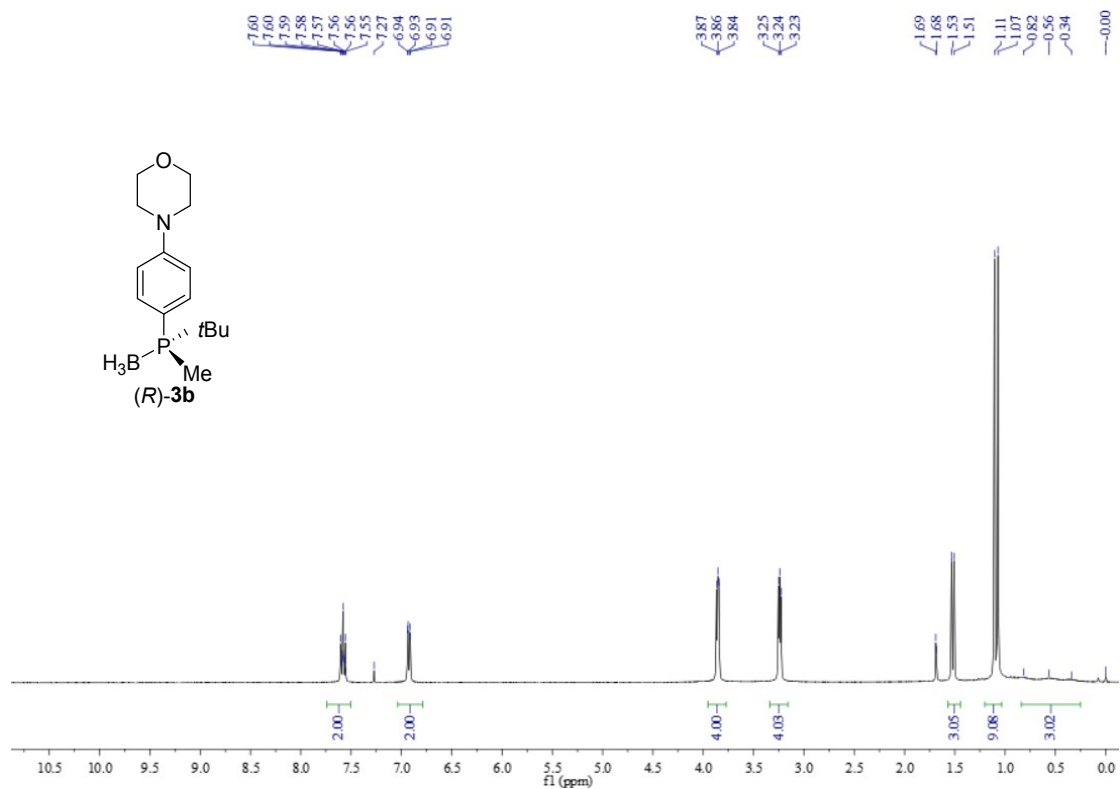

Figure S59. <sup>1</sup>H NMR spectrum of **(R)-3b** in CDCl<sub>3</sub>

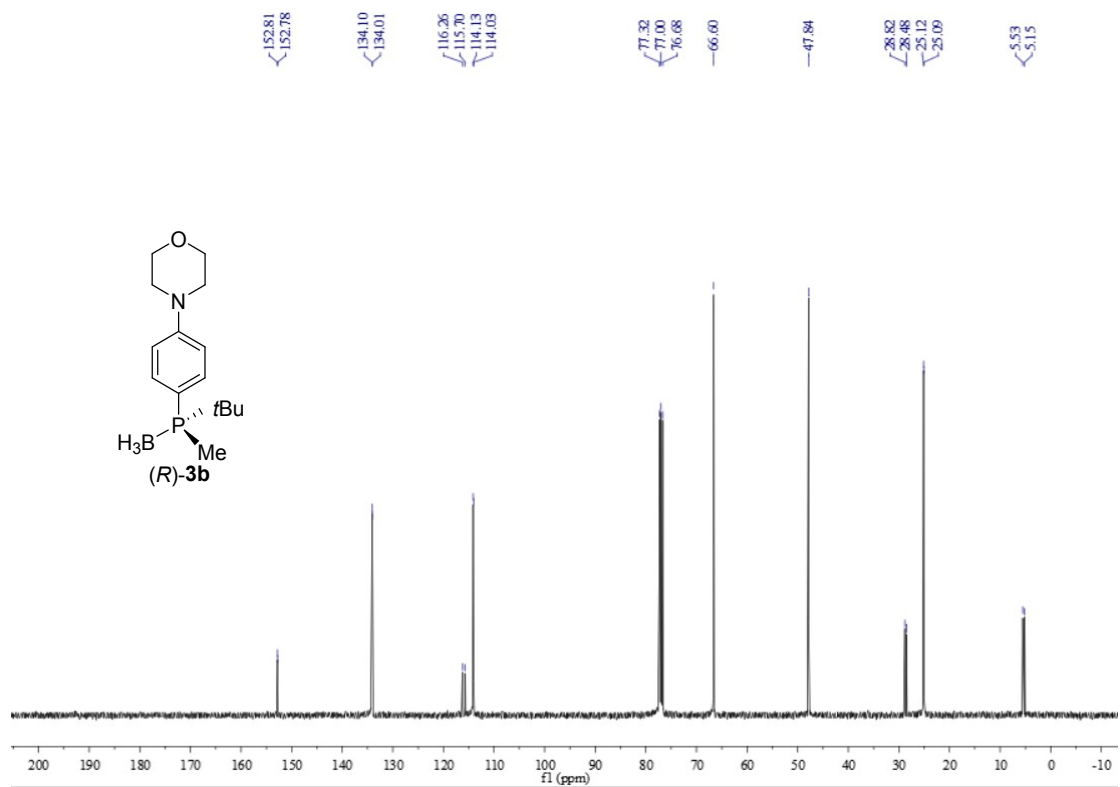

Figure S60. <sup>13</sup>C NMR spectrum of **(R)-3b** in CDCl<sub>3</sub>

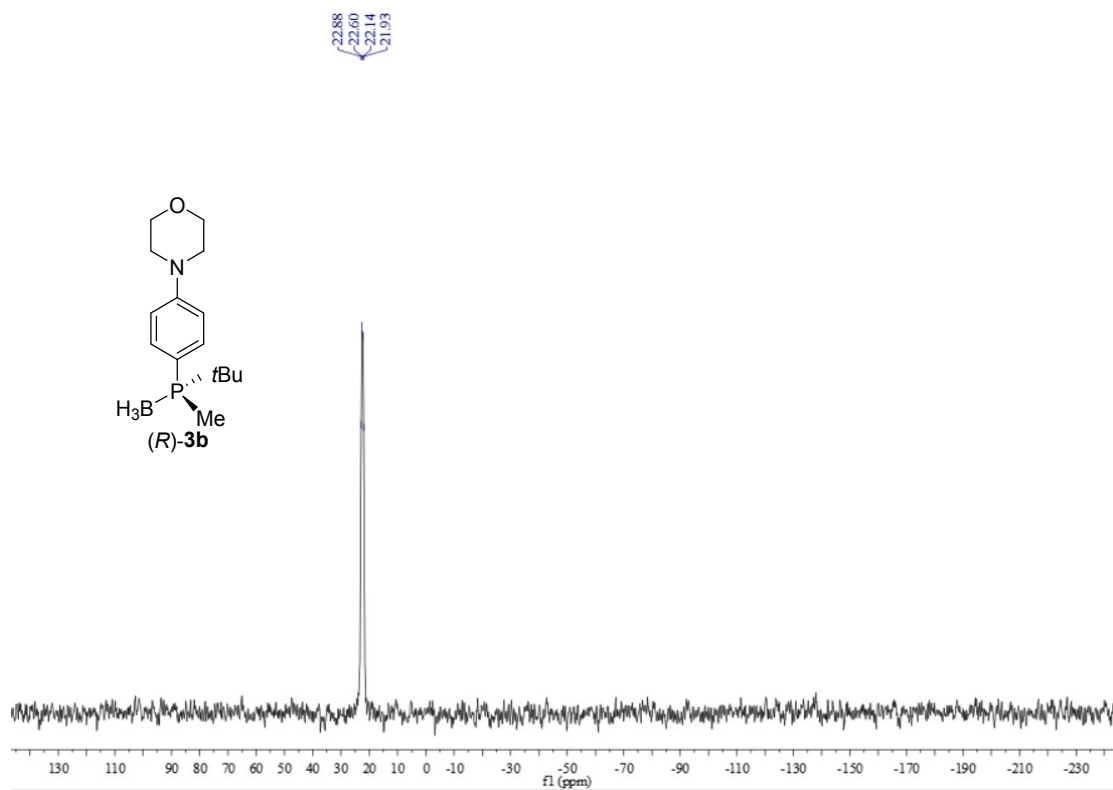

Figure S61. <sup>31</sup>P NMR spectrum of **(R)-3b** in CDCl<sub>3</sub>

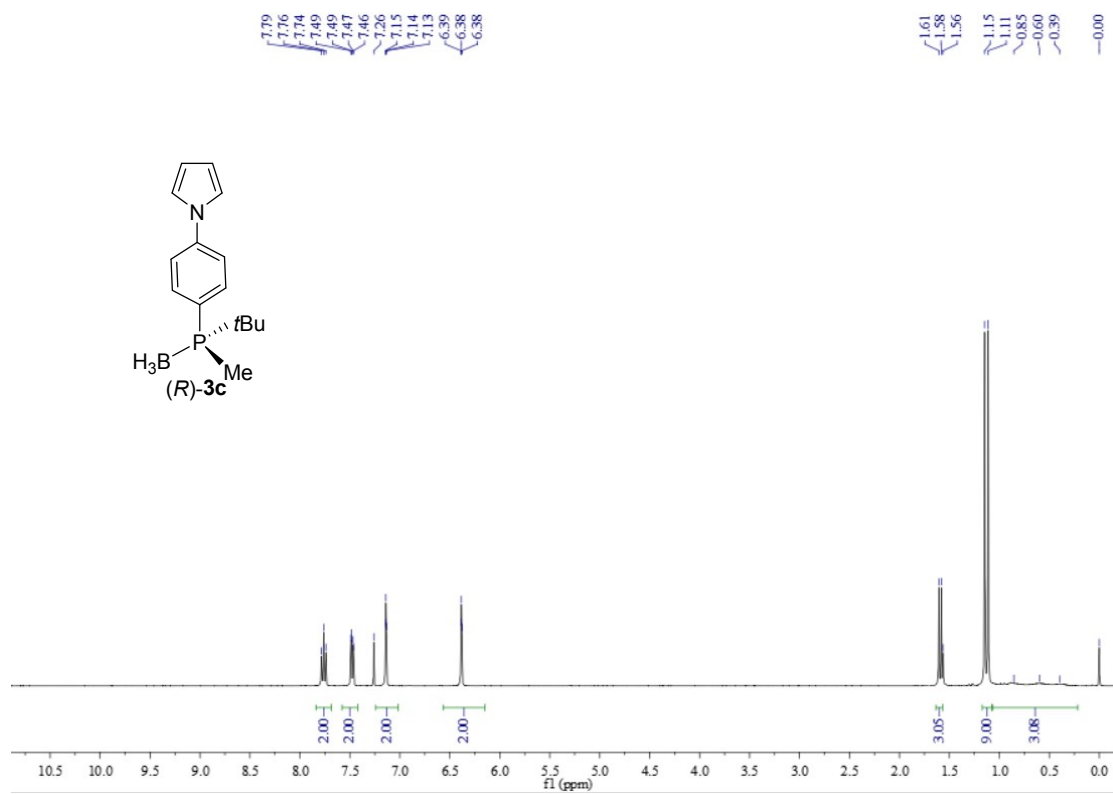

Figure S62. <sup>1</sup>H NMR spectrum of **(R)-3c** in CDCl<sub>3</sub>

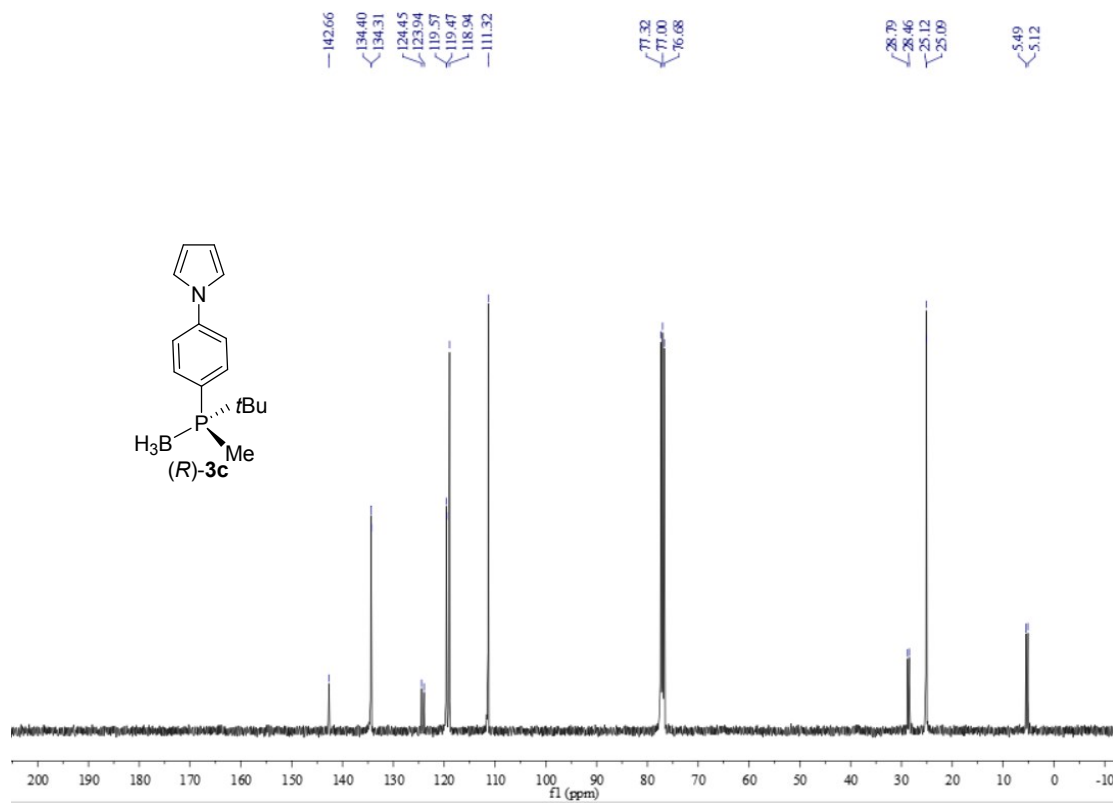

Figure S63. <sup>13</sup>C NMR spectrum of (*R*)-**3c** in CDCl<sub>3</sub>

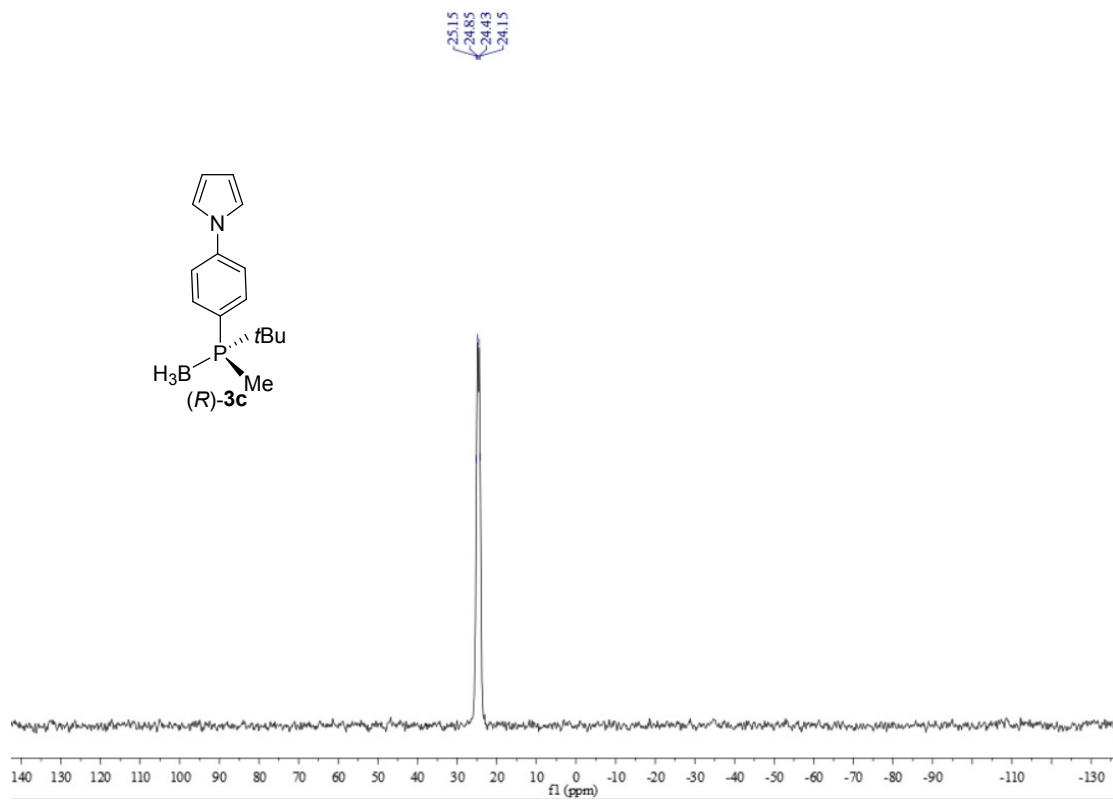

Figure S64. <sup>31</sup>P NMR spectrum of (*R*)-**3c** in CDCl<sub>3</sub>



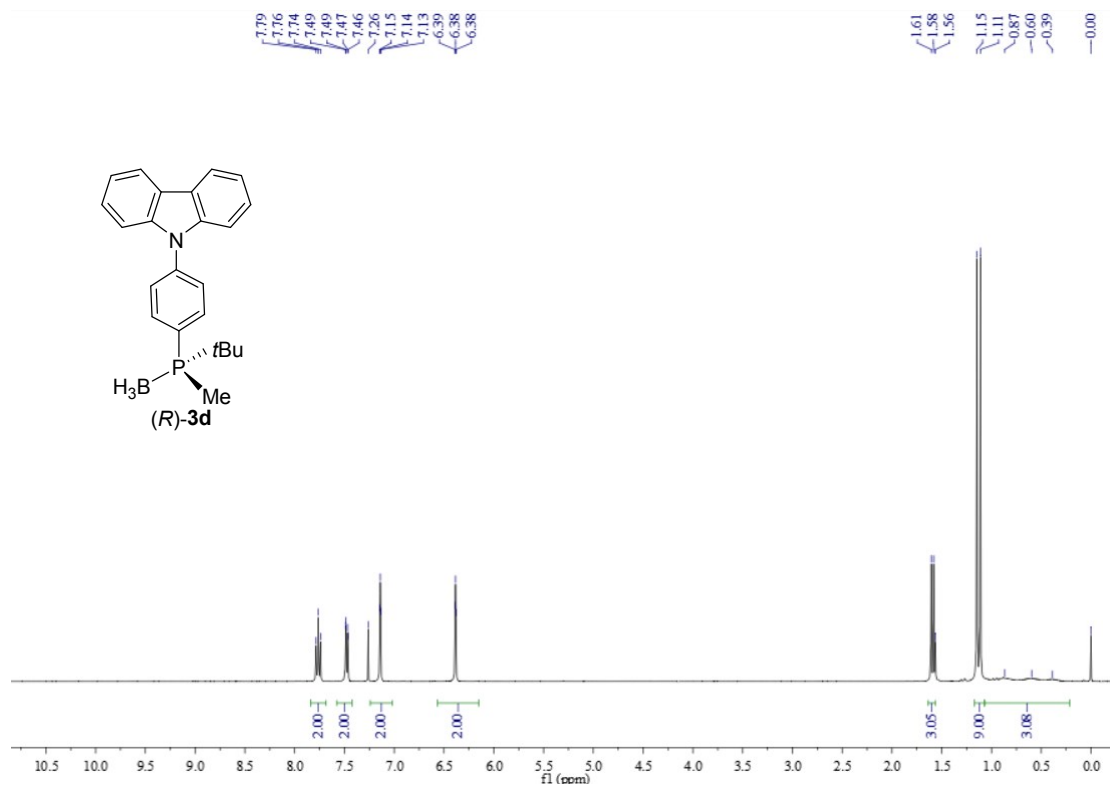

Figure S65. <sup>1</sup>H NMR spectrum of (R)-3d in CDCl<sub>3</sub>

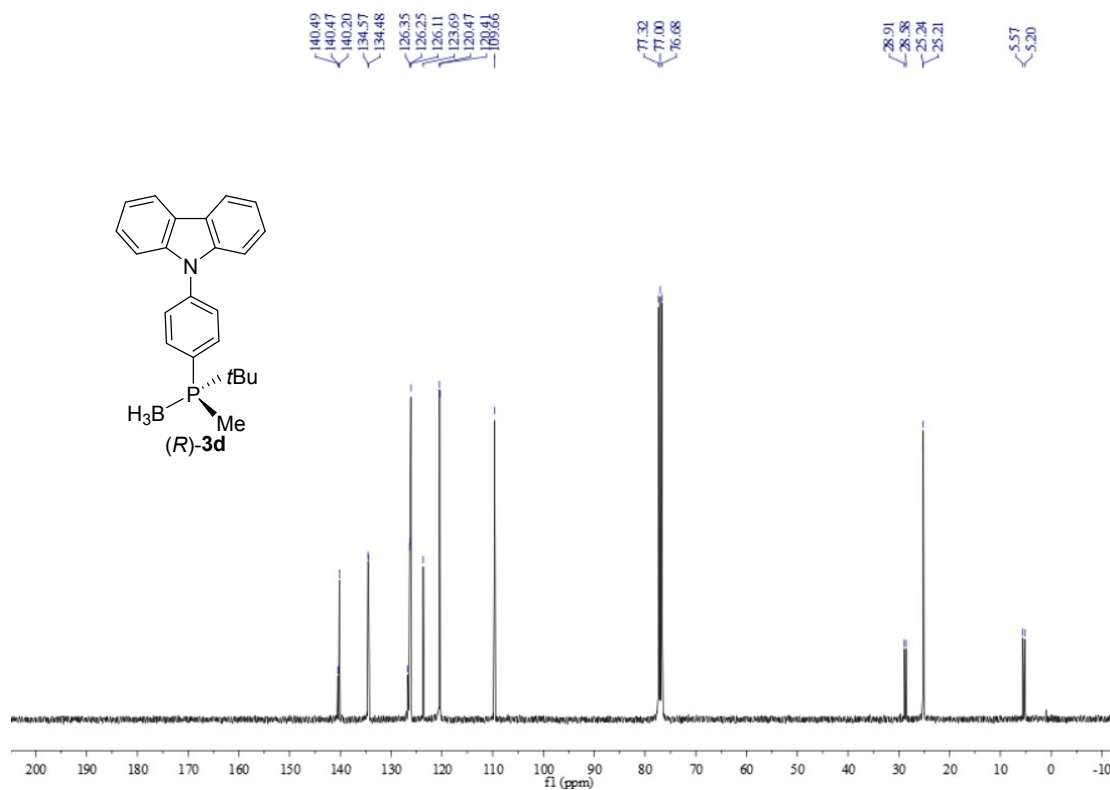

Figure S66. <sup>13</sup>C NMR spectrum of (R)-3d in CDCl<sub>3</sub>

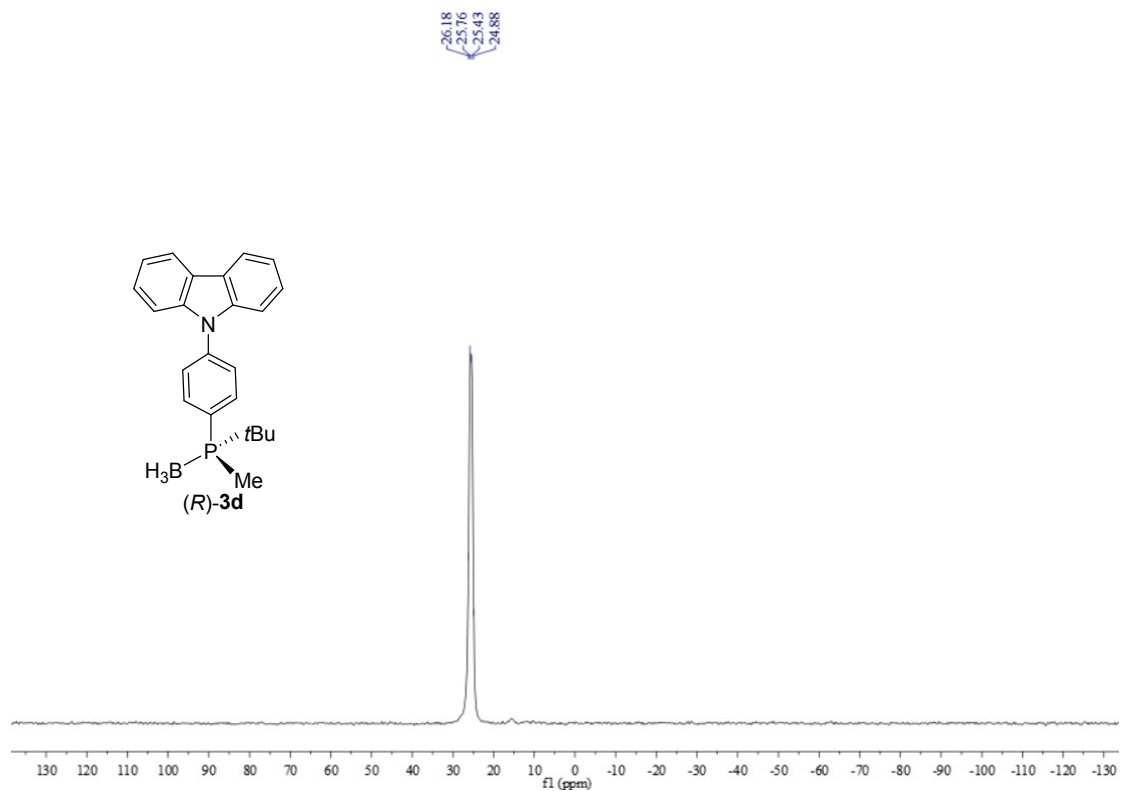

Figure S67. <sup>31</sup>P NMR spectrum of **(R)-3d** in CDCl<sub>3</sub>

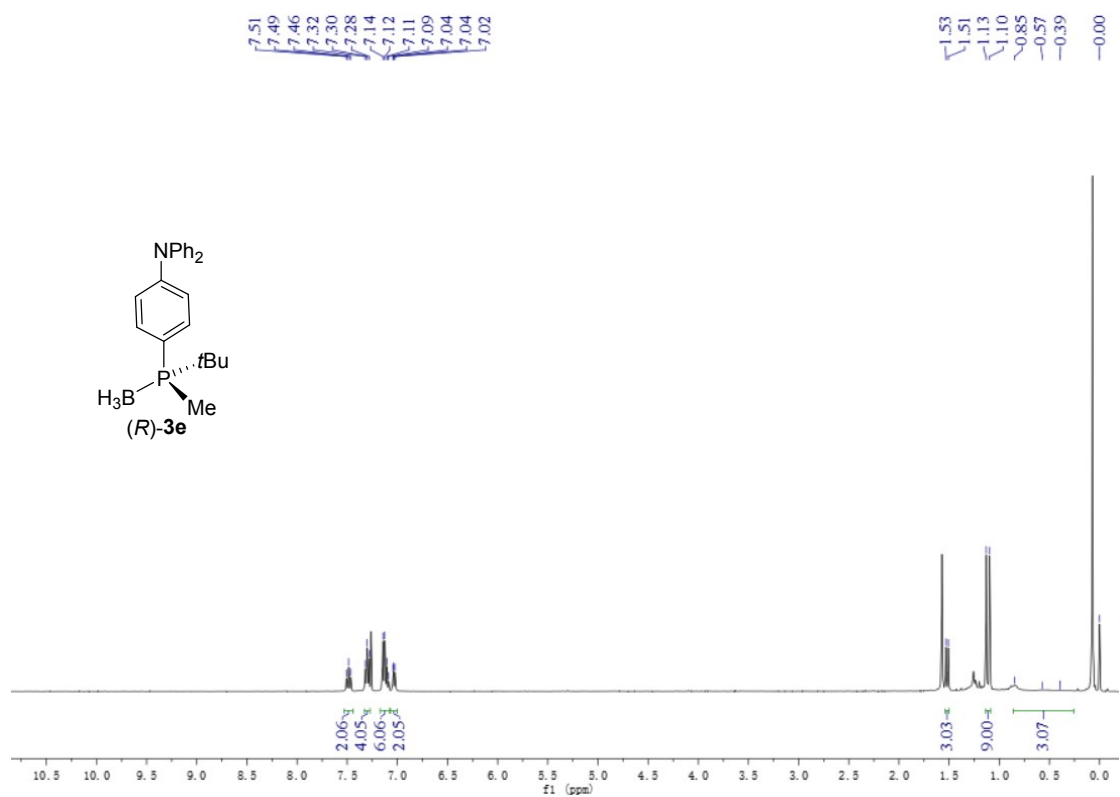

Figure S68. <sup>1</sup>H NMR spectrum of **(R)-3e** in CDCl<sub>3</sub>

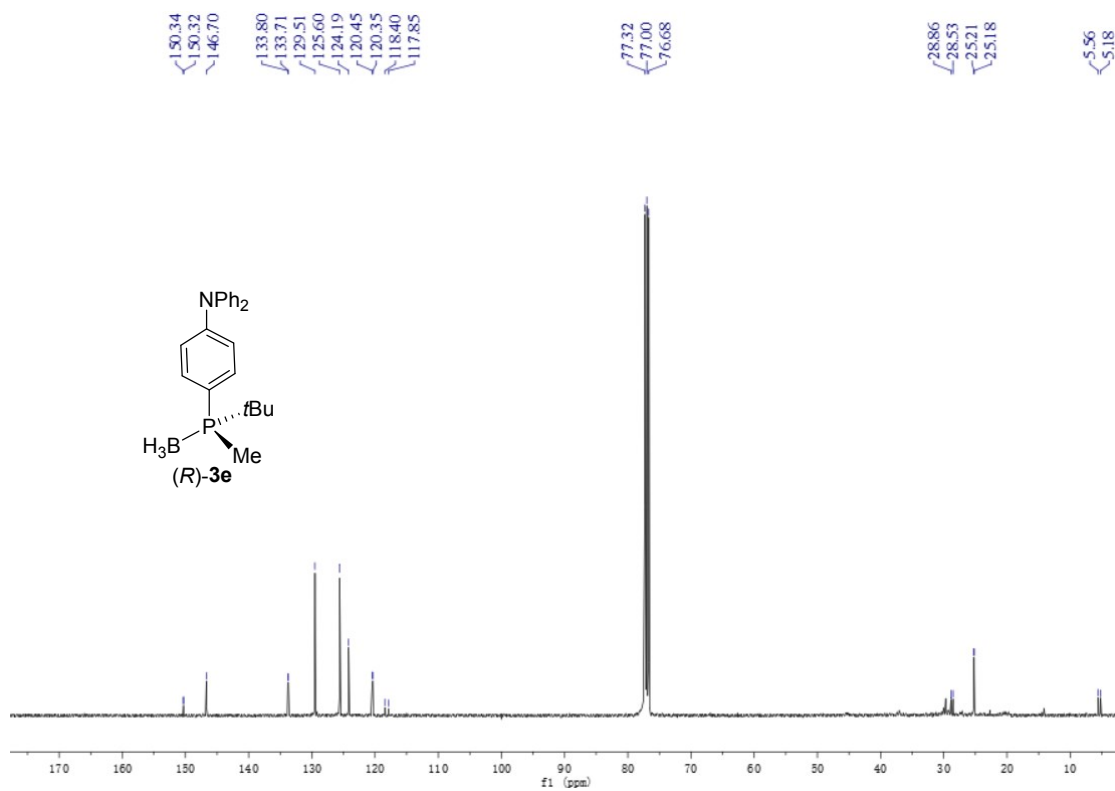

Figure S69. <sup>13</sup>C NMR spectrum of *(R)*-**3e** in CDCl<sub>3</sub>

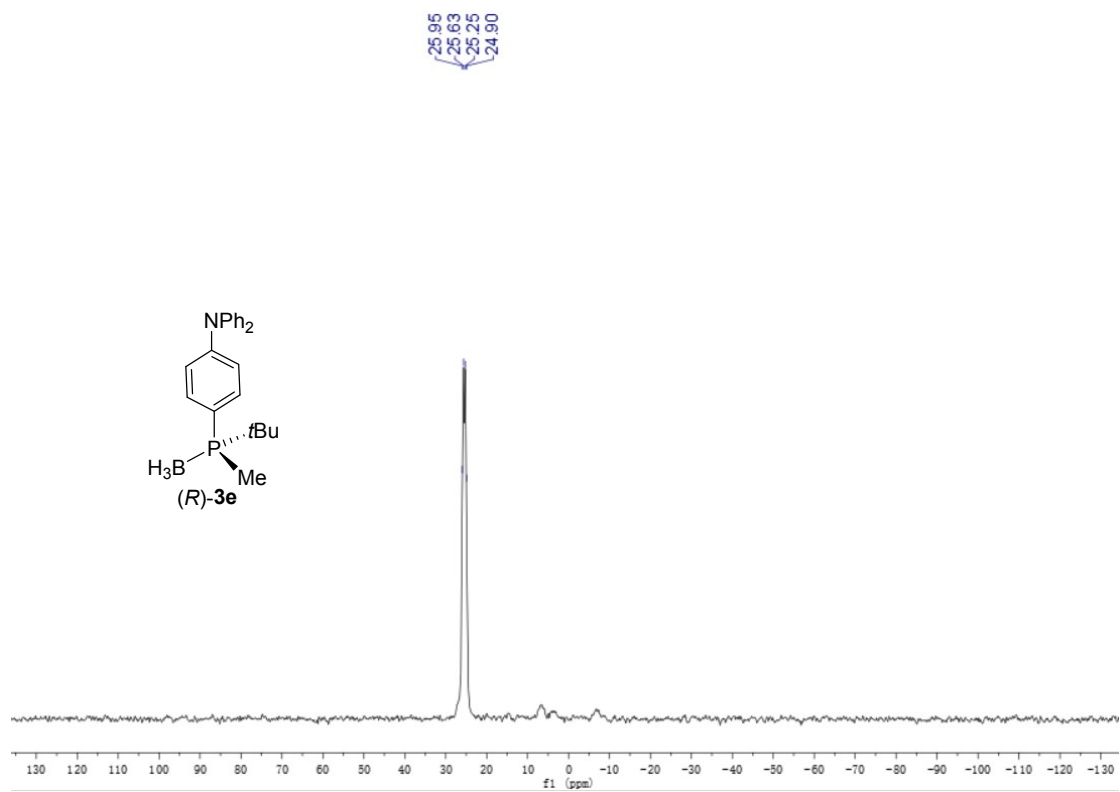

Figure S70. <sup>31</sup>P NMR spectrum of *(R)*-**3e** in CDCl<sub>3</sub>

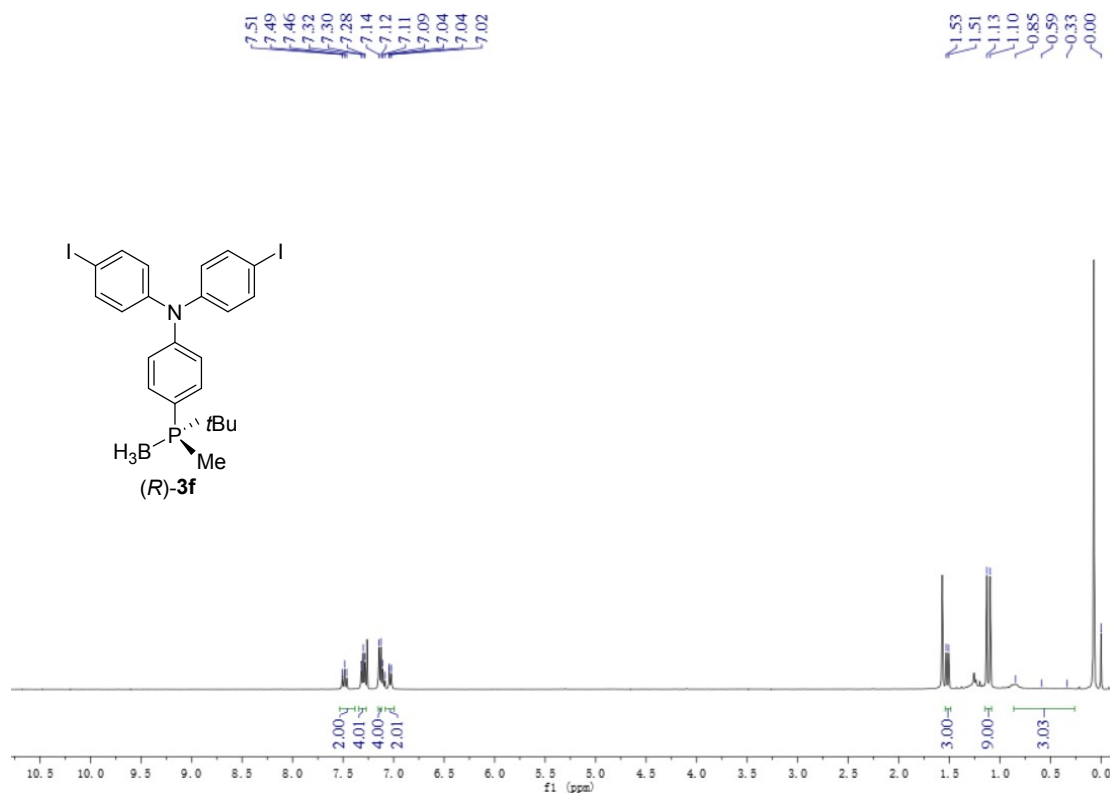

Figure S71. <sup>1</sup>H NMR spectrum of **(R)-3f** in CDCl<sub>3</sub>

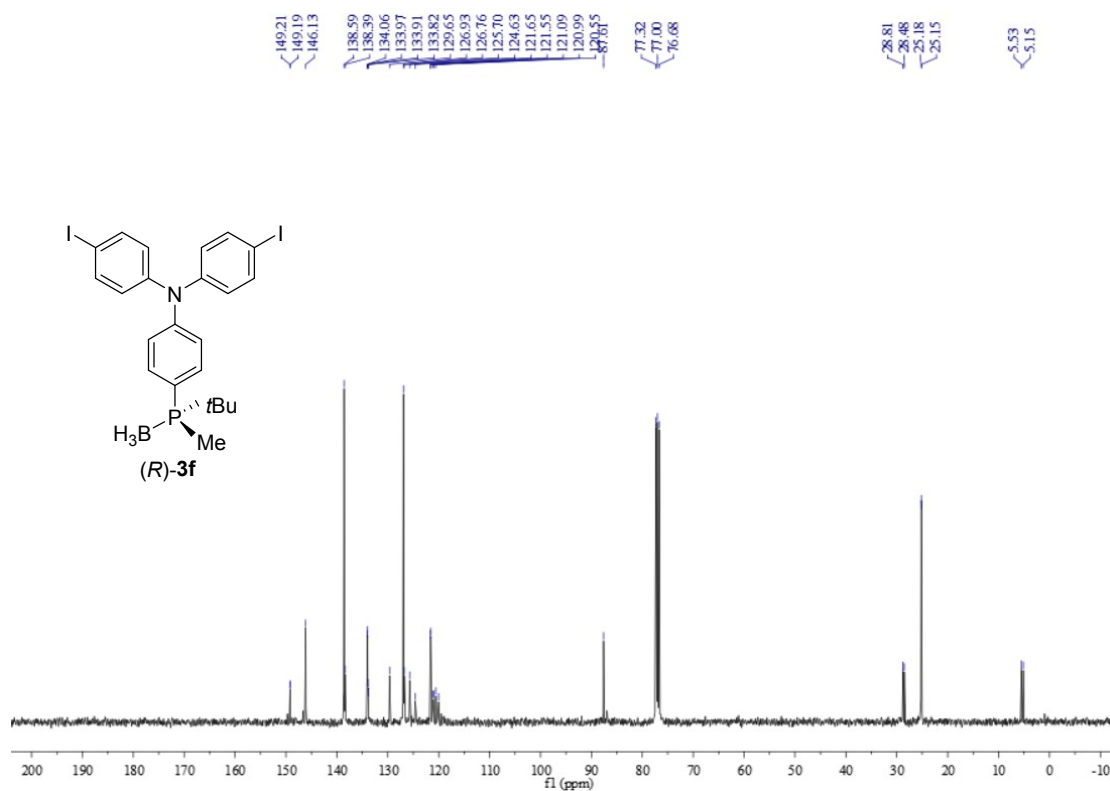

Figure S72. <sup>13</sup>C NMR spectrum of **(R)-3f** in CDCl<sub>3</sub>

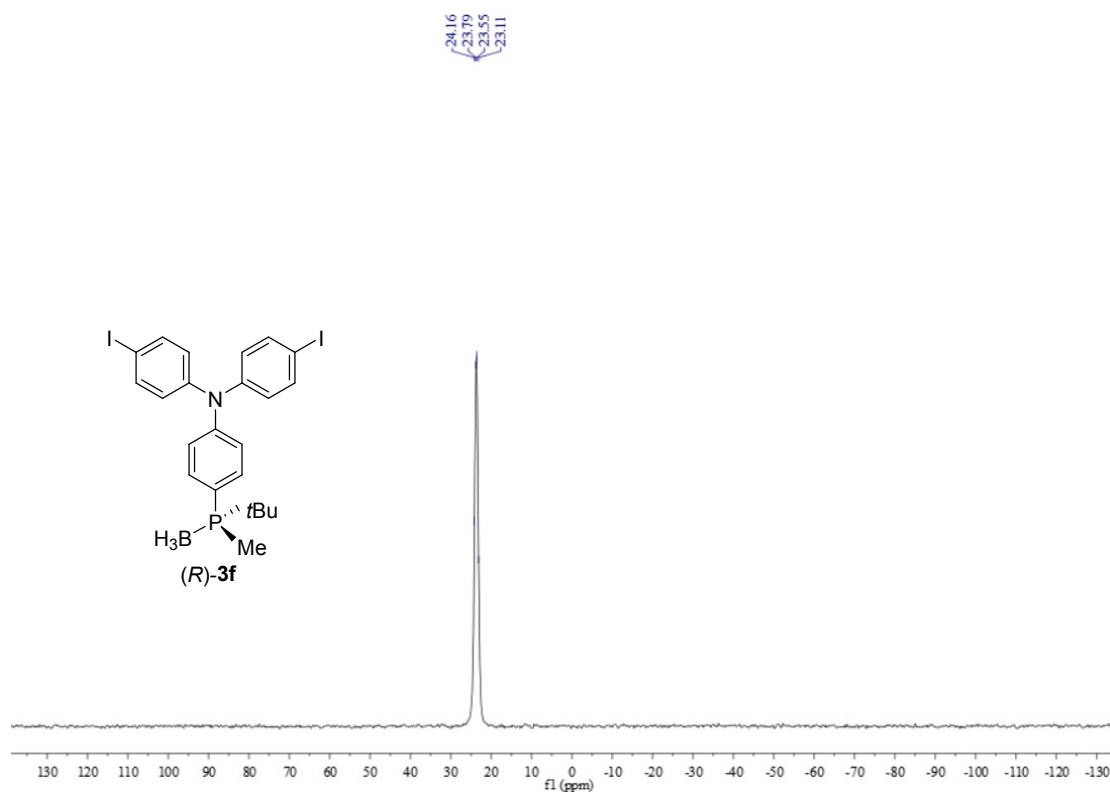

Figure S73. <sup>31</sup>P NMR spectrum of **(R)-3f** in CDCl<sub>3</sub>

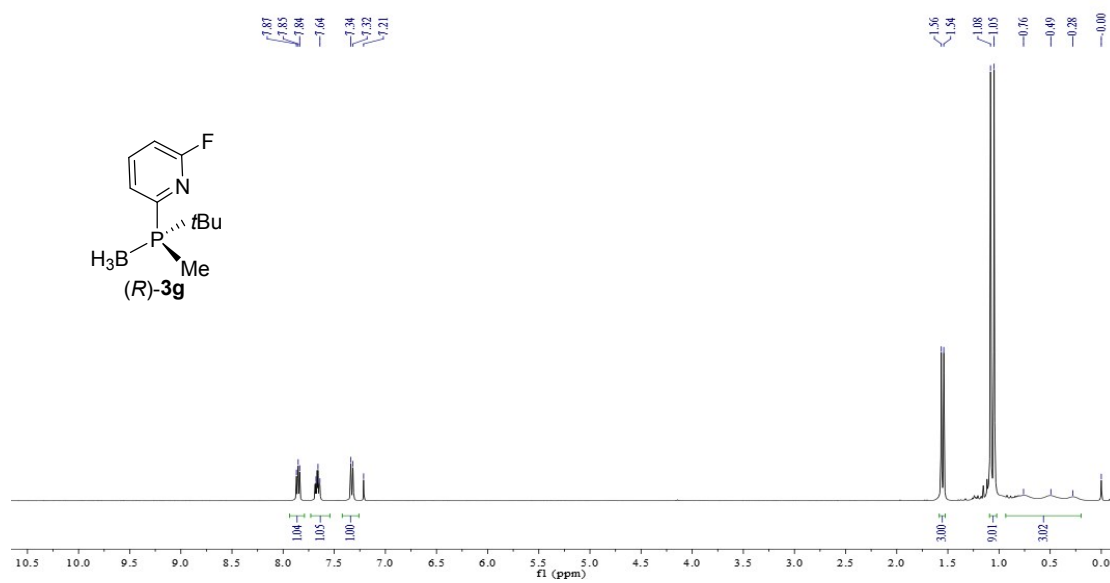

Figure S74. <sup>1</sup>H NMR spectrum of **(R)-3g** in CDCl<sub>3</sub>

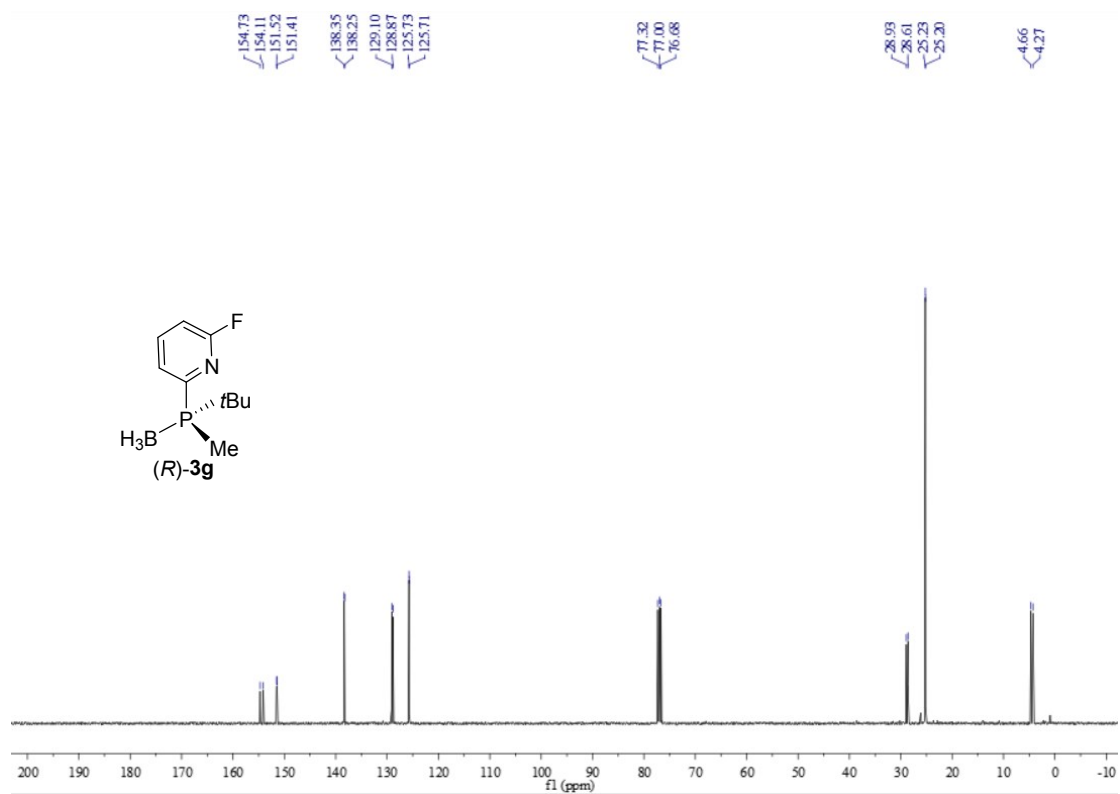

Figure S75. <sup>13</sup>C NMR spectrum of *(R)*-**3g** in CDCl<sub>3</sub>

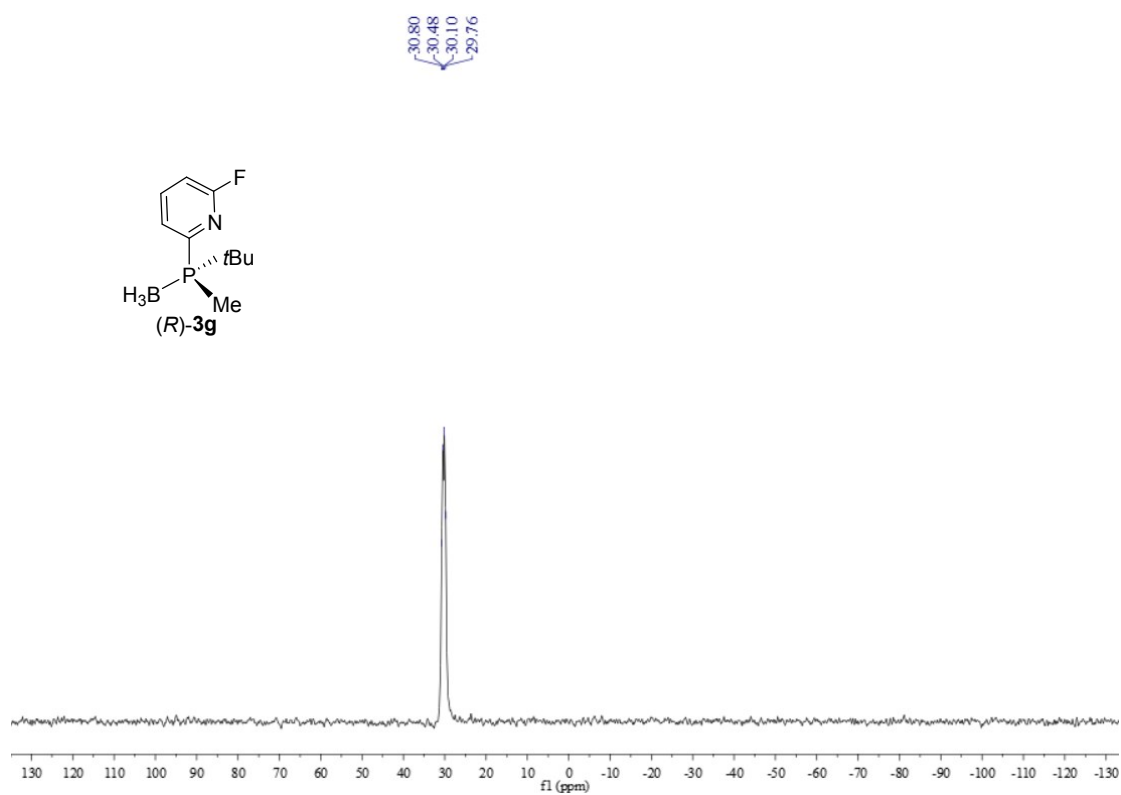

Figure S76. <sup>31</sup>P NMR spectrum of *(R)*-**3g** in CDCl<sub>3</sub>

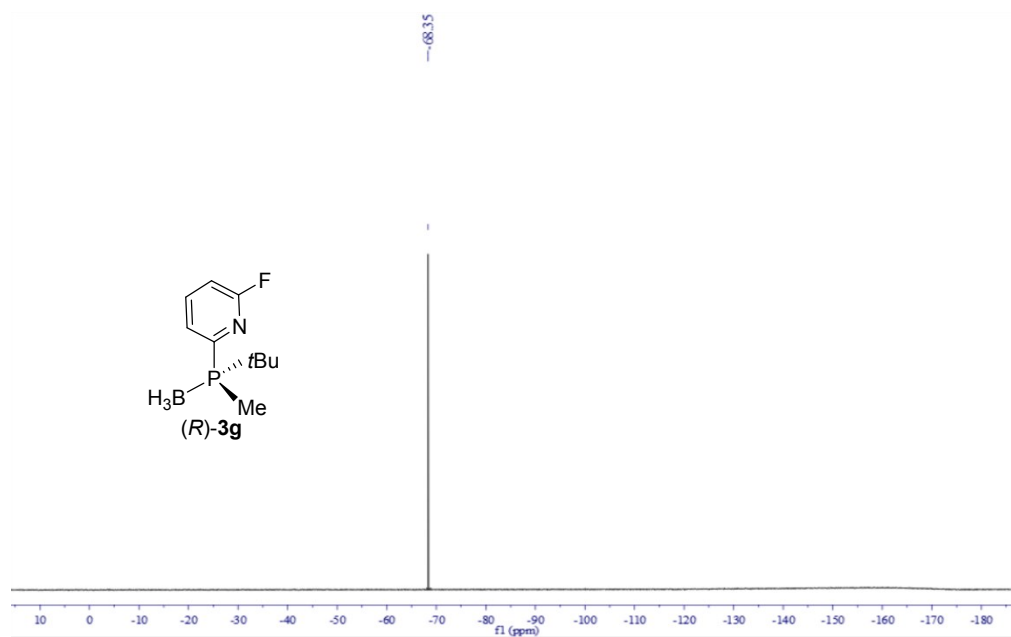

Figure S77. <sup>19</sup>F NMR spectrum of (R)-3g in CDCl<sub>3</sub>

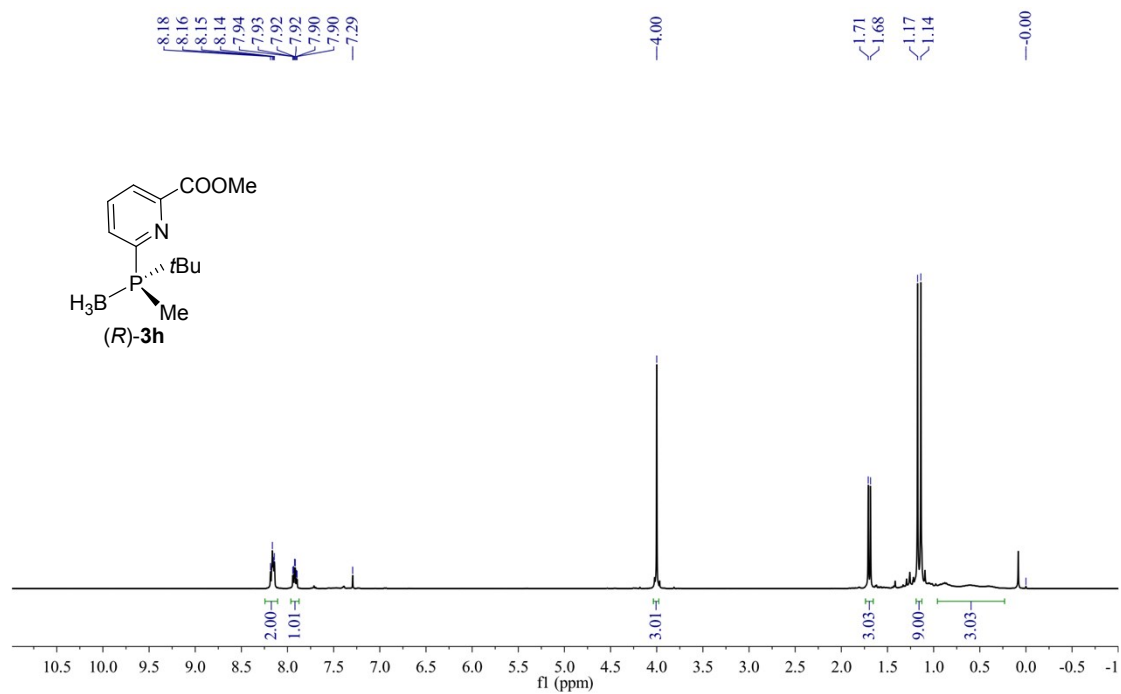

Figure S78. <sup>1</sup>H NMR spectrum of (R)-3h in CDCl<sub>3</sub>

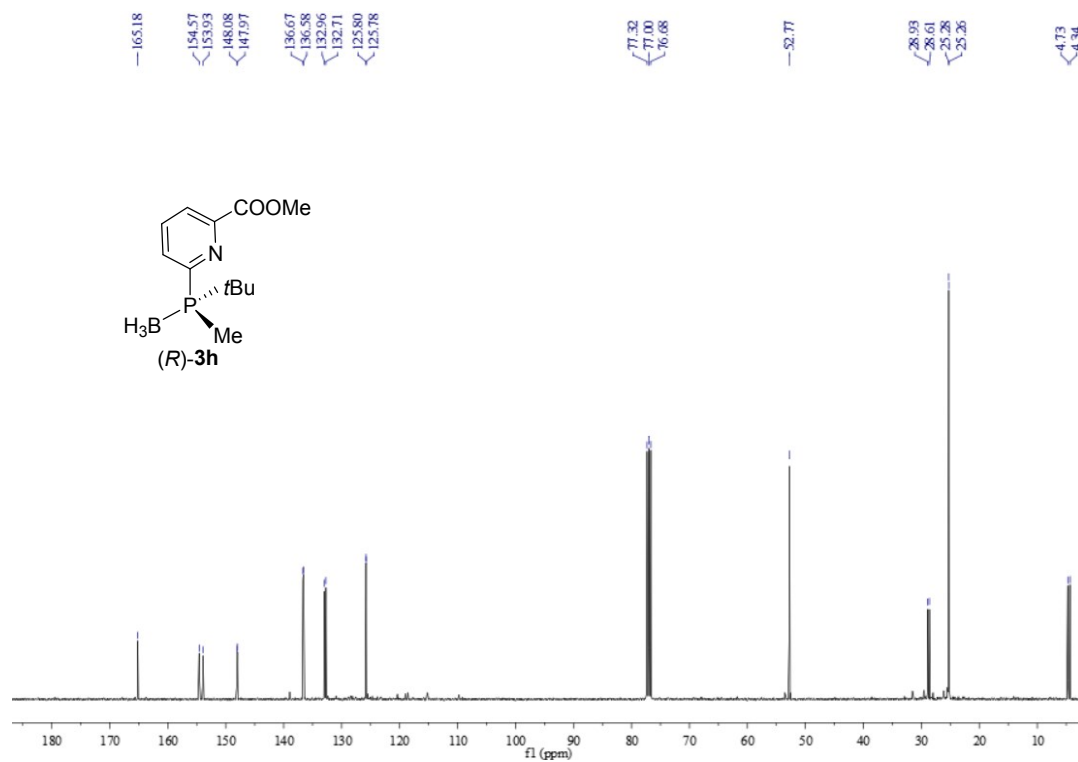

Figure S79. <sup>13</sup>C NMR spectrum of (R)-3h in CDCl<sub>3</sub>

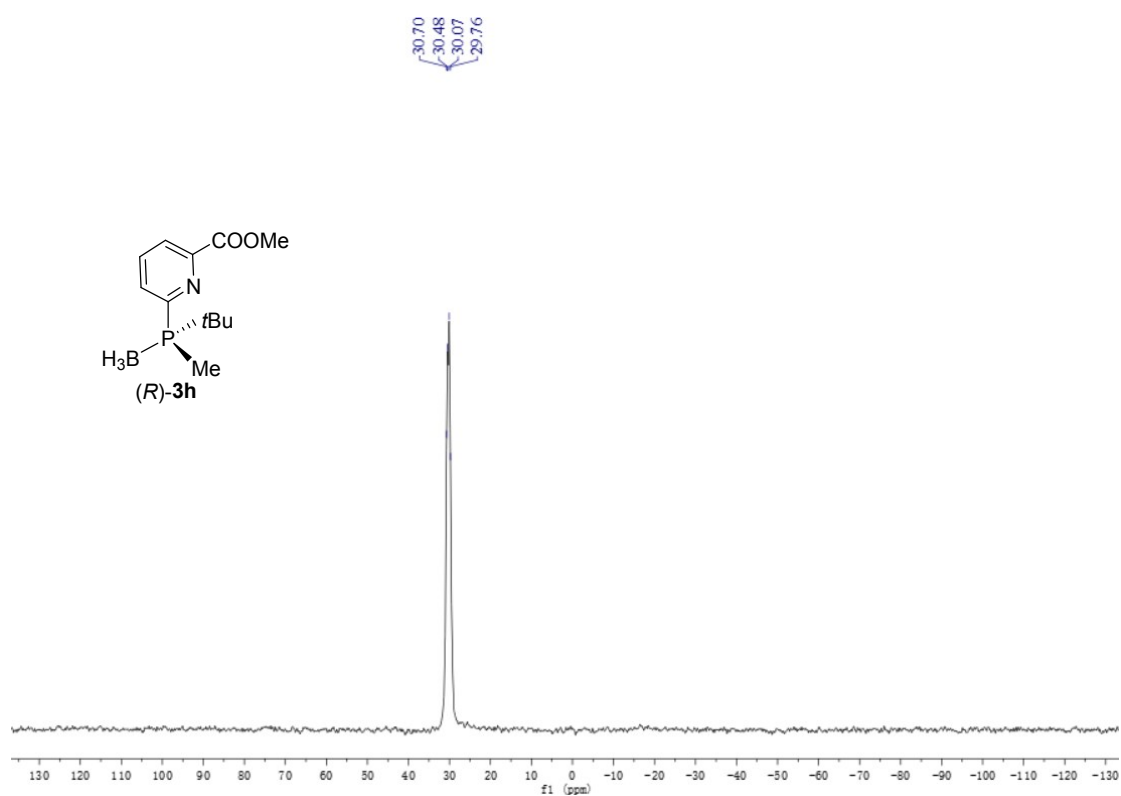

Figure S80. <sup>31</sup>P NMR spectrum of (R)-3h in CDCl<sub>3</sub>



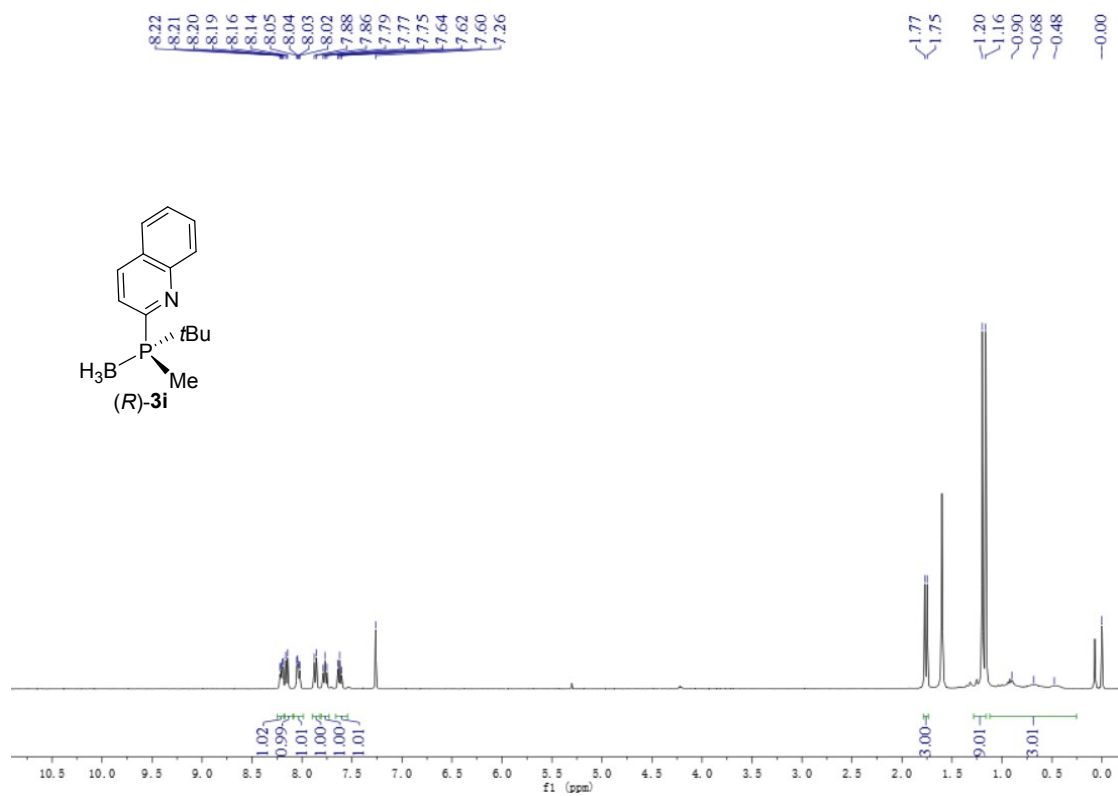

Figure S81. <sup>1</sup>H NMR spectrum of (R)-3i in CDCl<sub>3</sub>

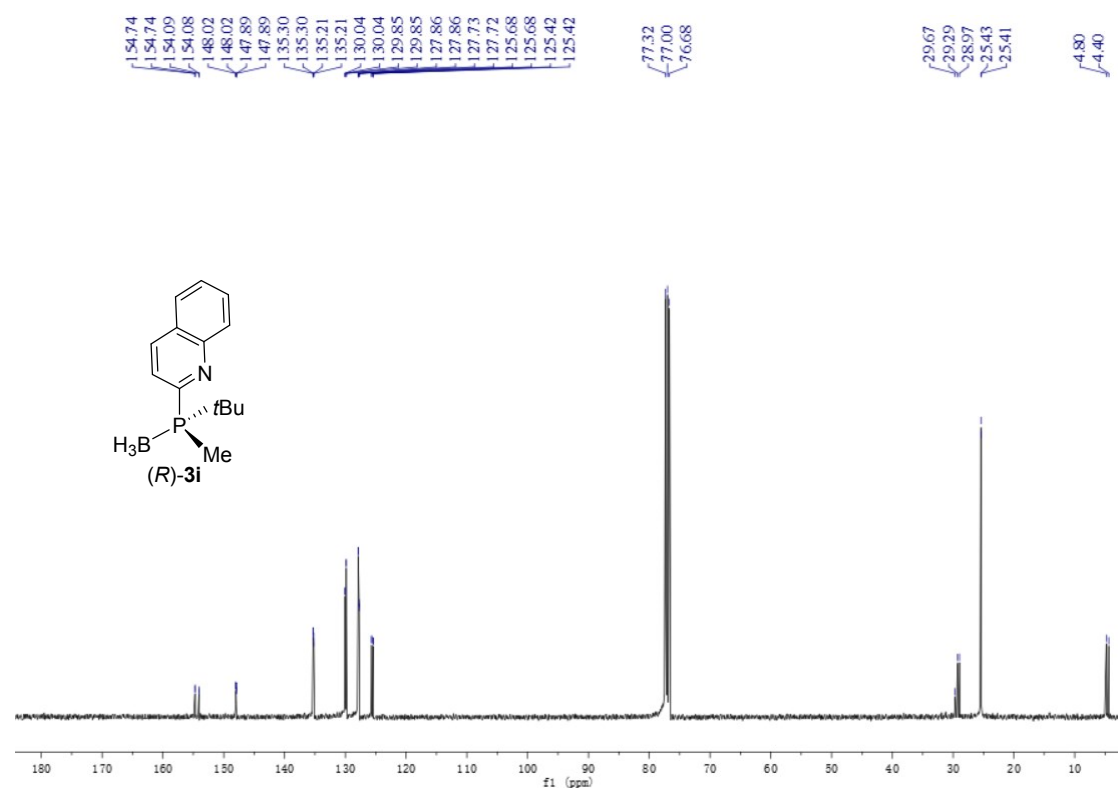

Figure S82. <sup>13</sup>C NMR spectrum of (R)-3i in CDCl<sub>3</sub>

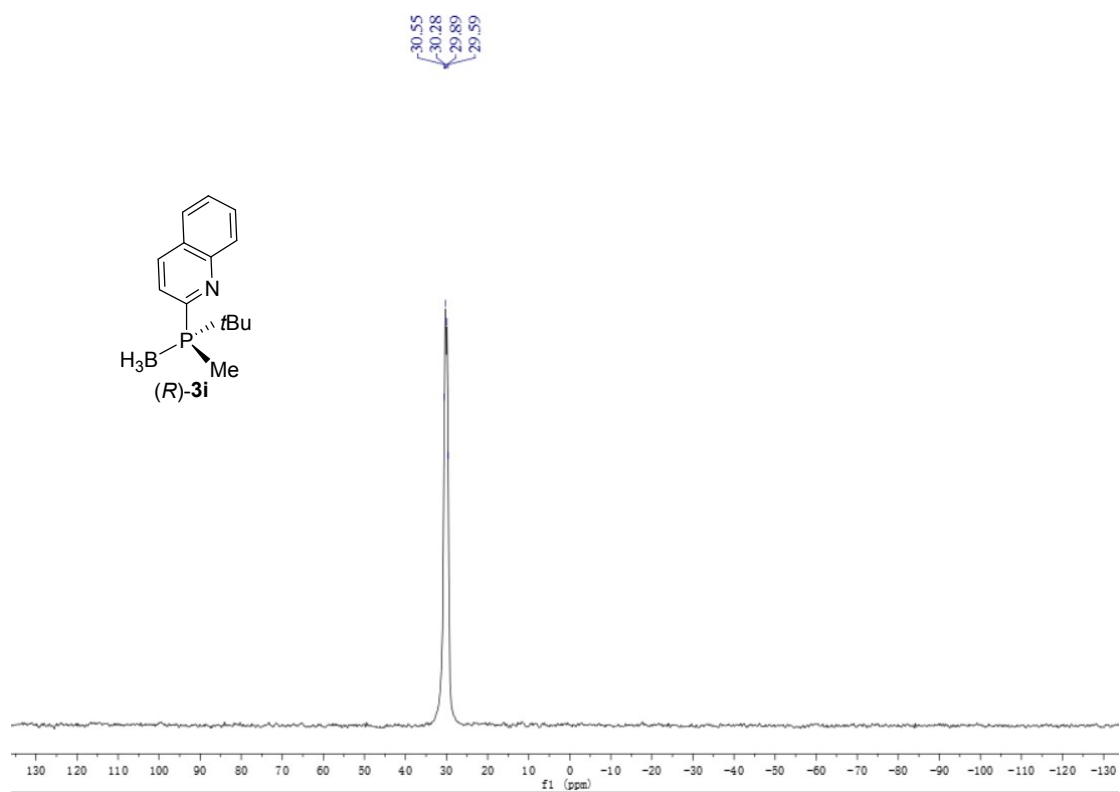

Figure S83. <sup>31</sup>P NMR spectrum of (R)-3i in CDCl<sub>3</sub>

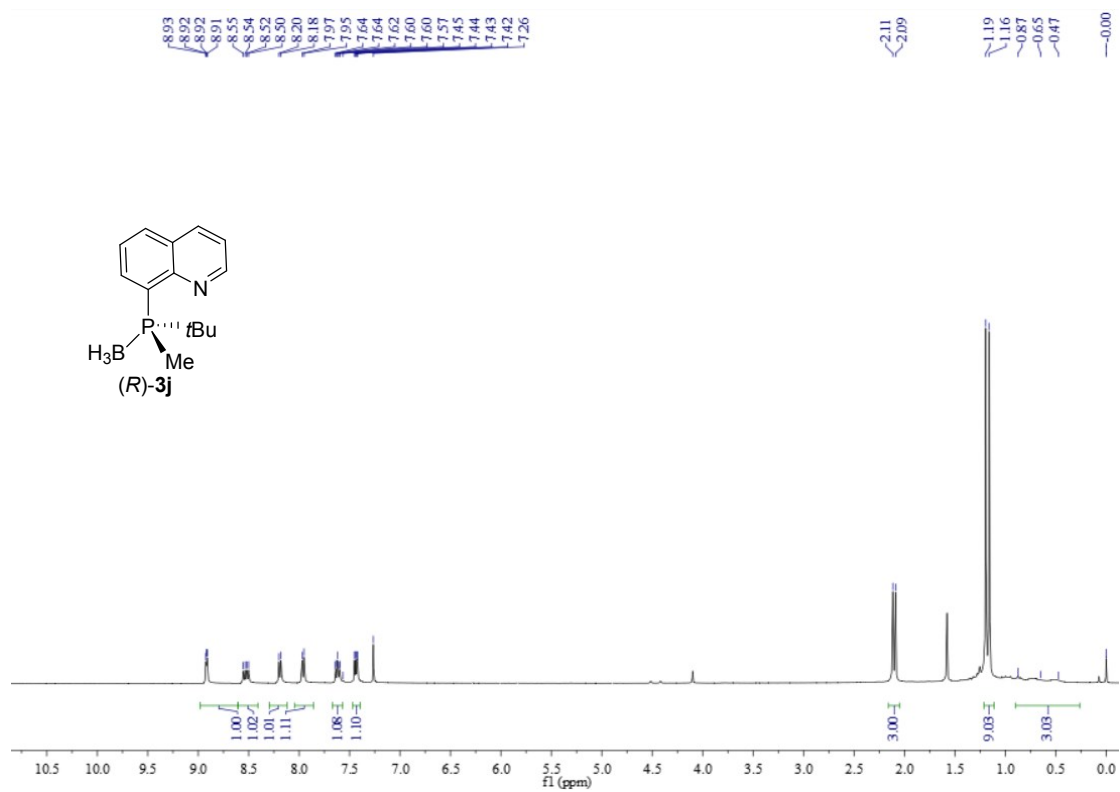

Figure S84. <sup>1</sup>H NMR spectrum of (R)-3j in CDCl<sub>3</sub>

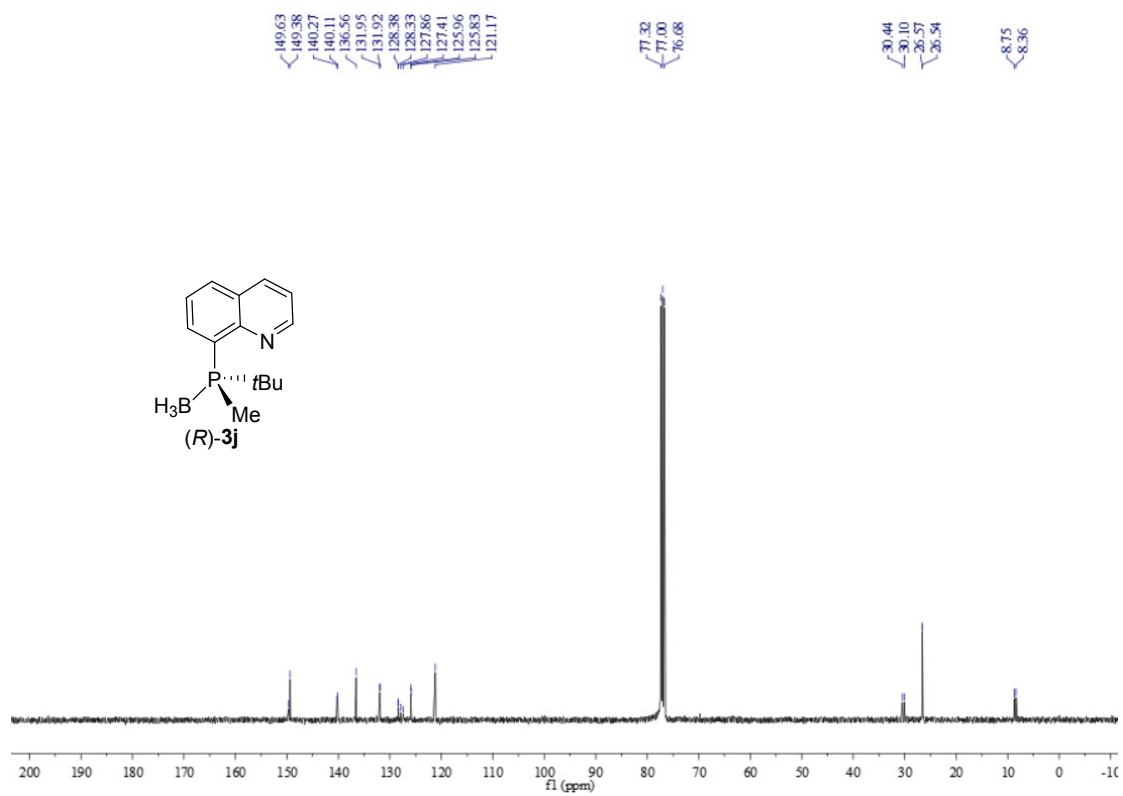

Figure S85. <sup>13</sup>C NMR spectrum of (*R*)-3j in CDCl<sub>3</sub>

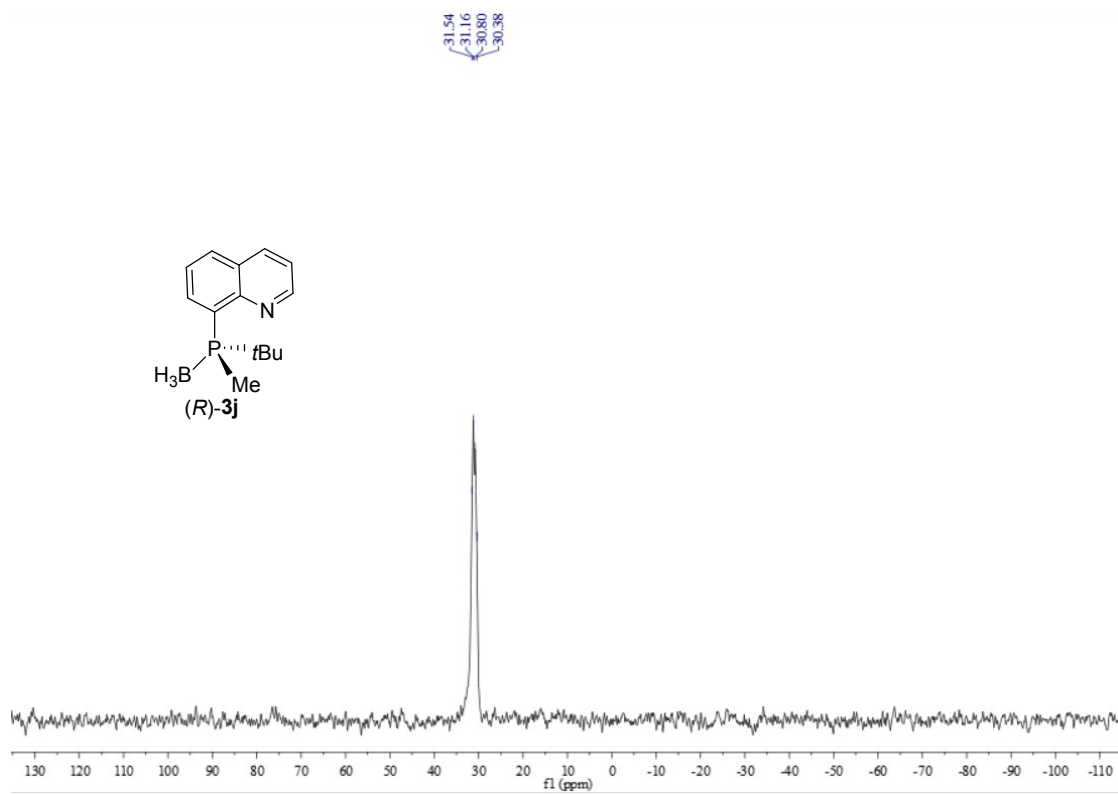

Figure S86. <sup>31</sup>P NMR spectrum of (*R*)-3j in CDCl<sub>3</sub>

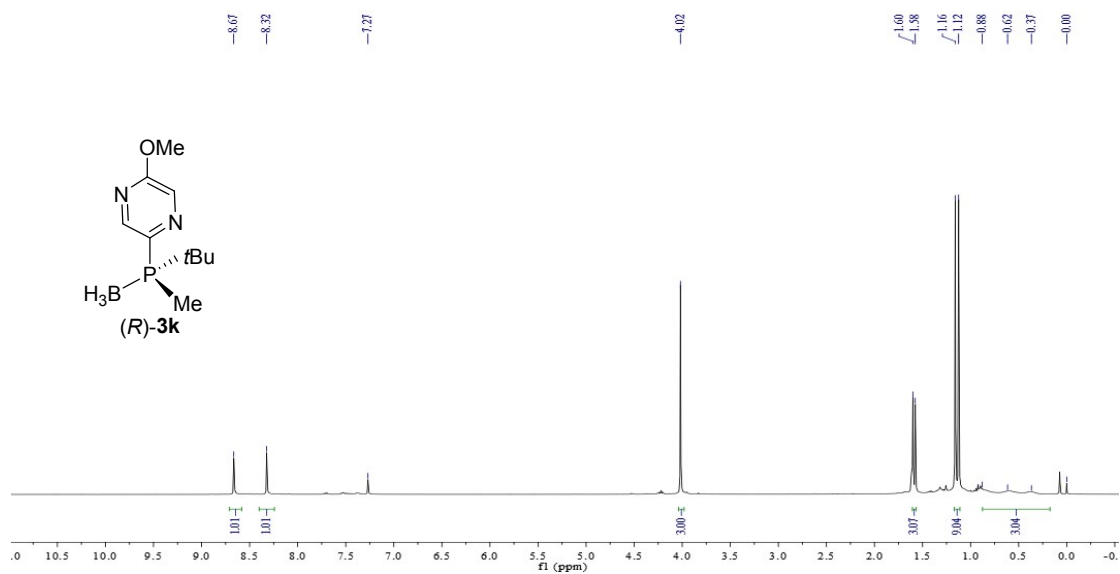

Figure S87. <sup>1</sup>H NMR spectrum of *(R)*-**3k** in CDCl<sub>3</sub>

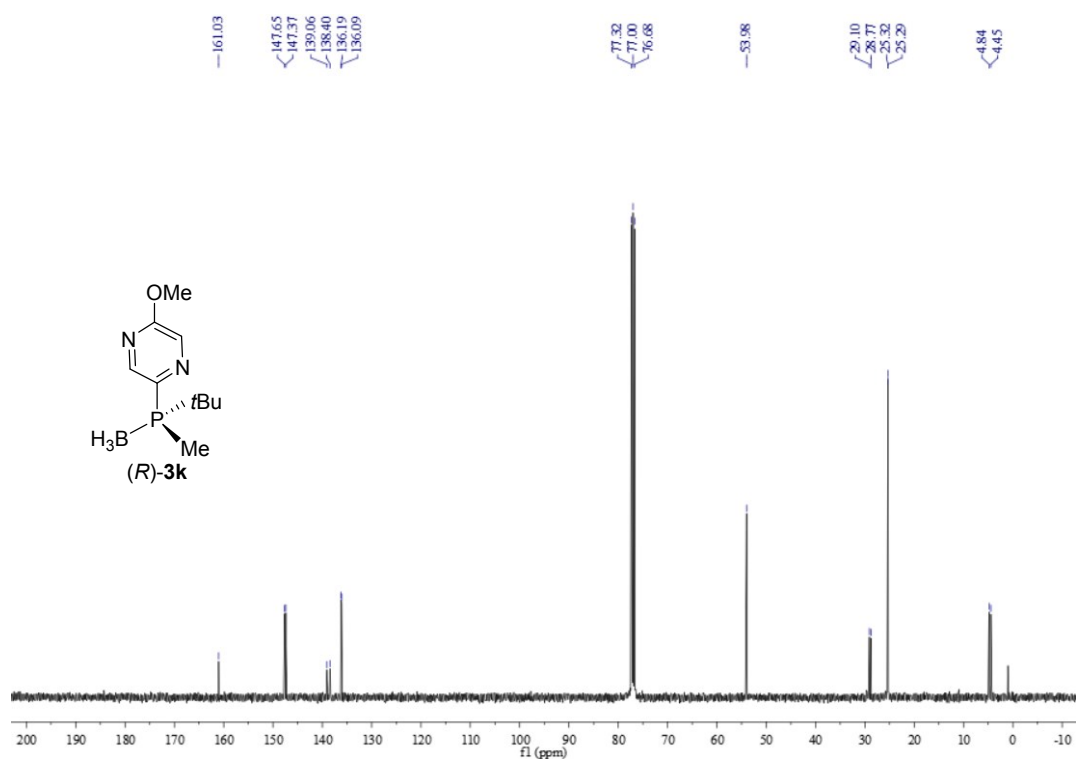

Figure S88. <sup>13</sup>C NMR spectrum of *(R)*-**3k** in CDCl<sub>3</sub>

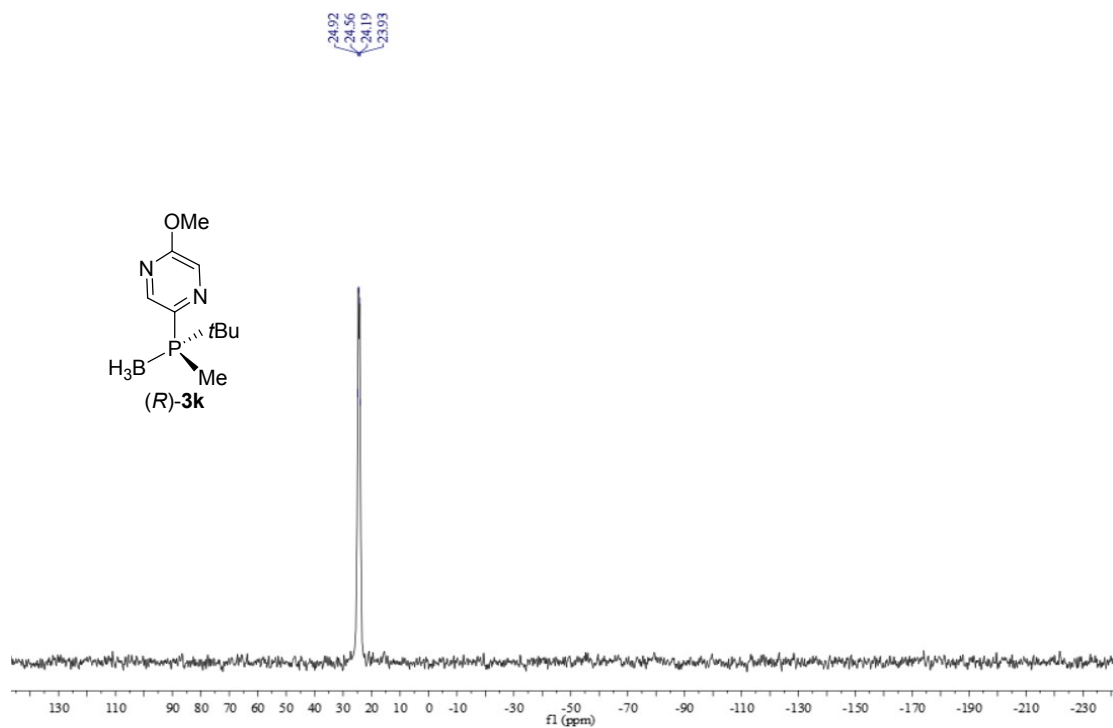

Figure S89. <sup>31</sup>P NMR spectrum of **(R)-3k** in CDCl<sub>3</sub>

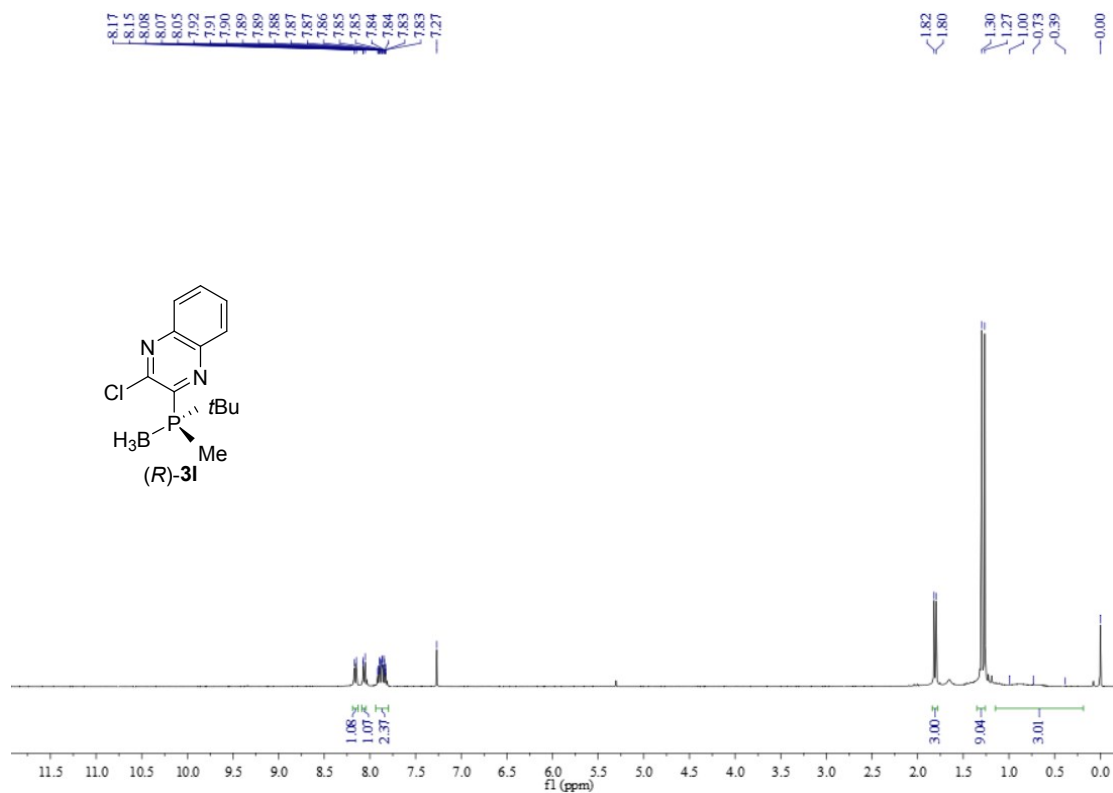

Figure S90. <sup>1</sup>H NMR spectrum of **(R)-3l** in CDCl<sub>3</sub>

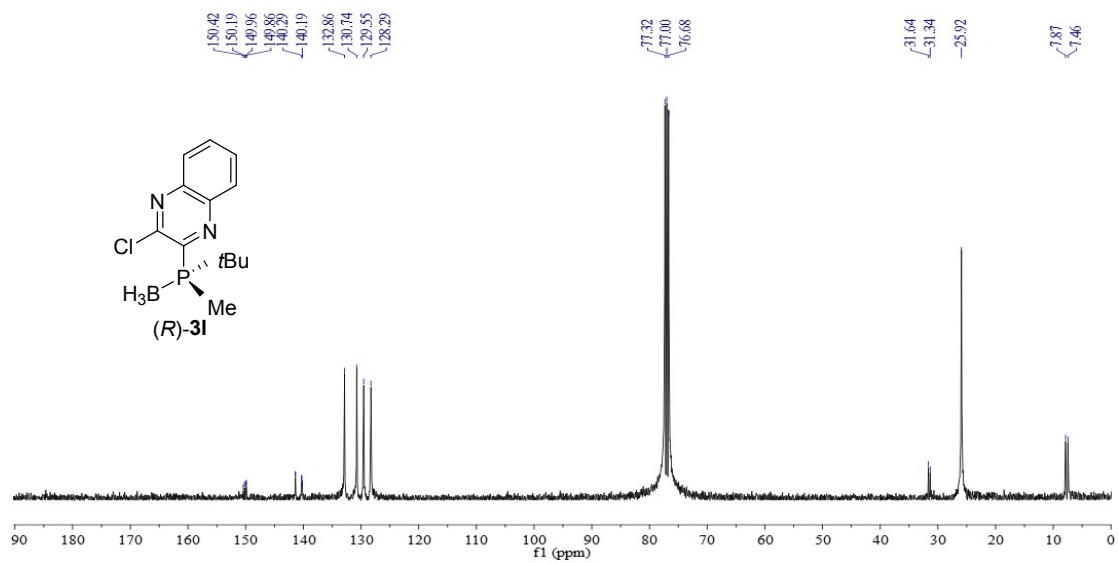

Figure S91. <sup>13</sup>C NMR spectrum of *(R)*-**3I** in CDCl<sub>3</sub>

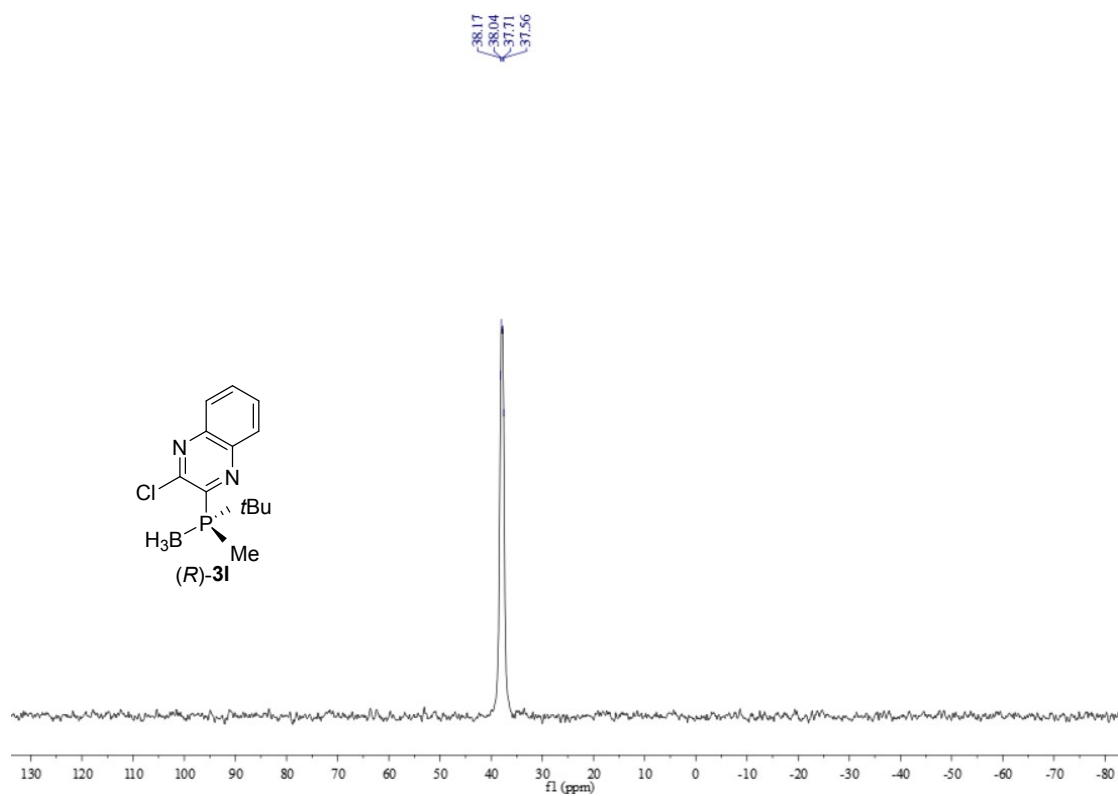

Figure S92. <sup>31</sup>P NMR spectrum of *(R)*-**3I** in CDCl<sub>3</sub>

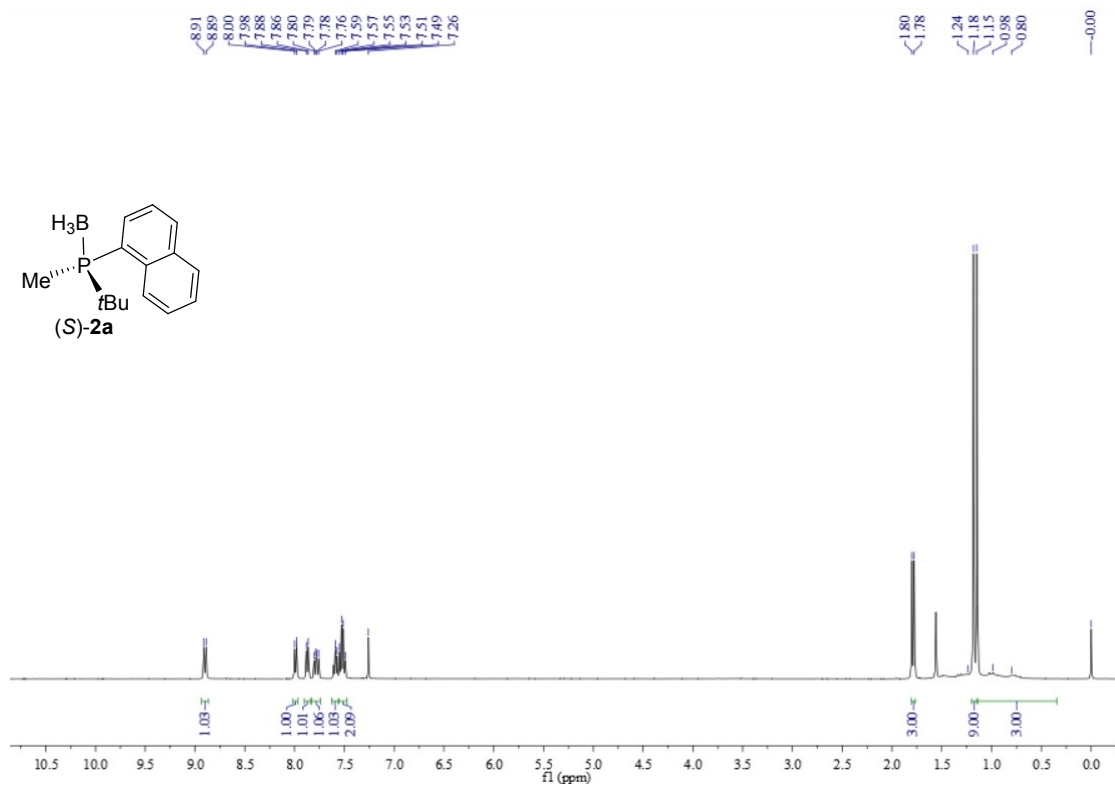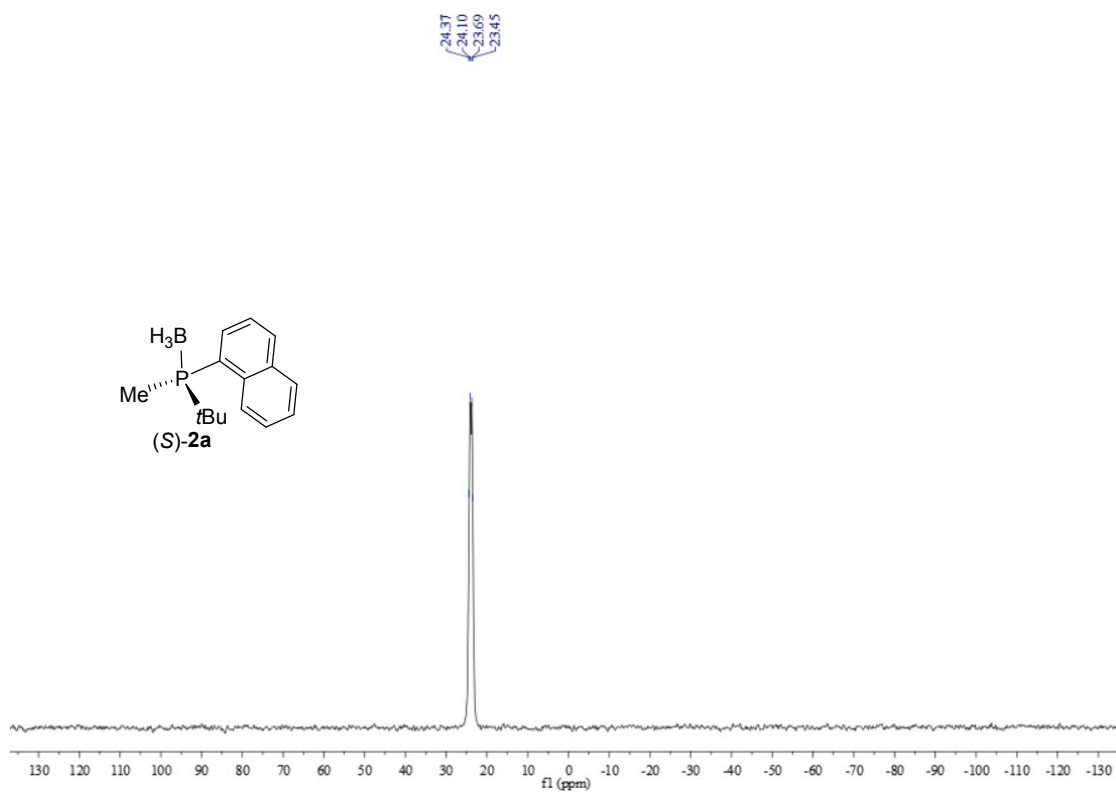

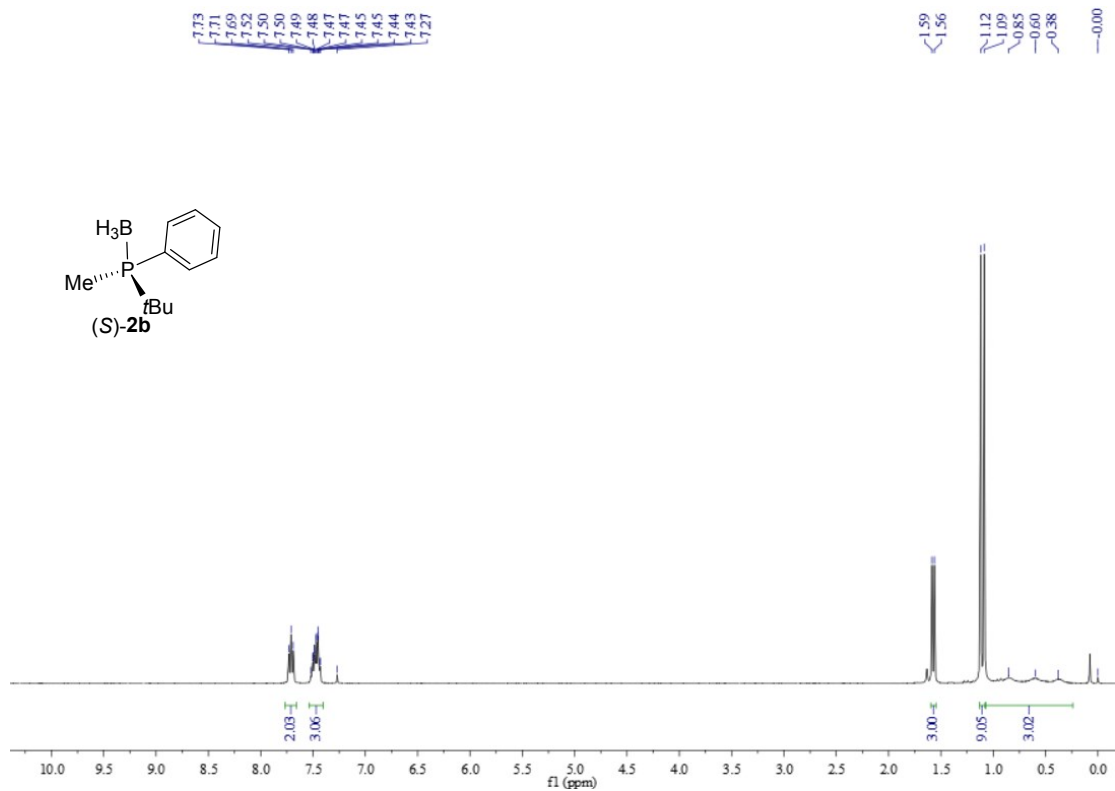

Figure S95. <sup>1</sup>H NMR spectrum of (S)-2b in CDCl<sub>3</sub>

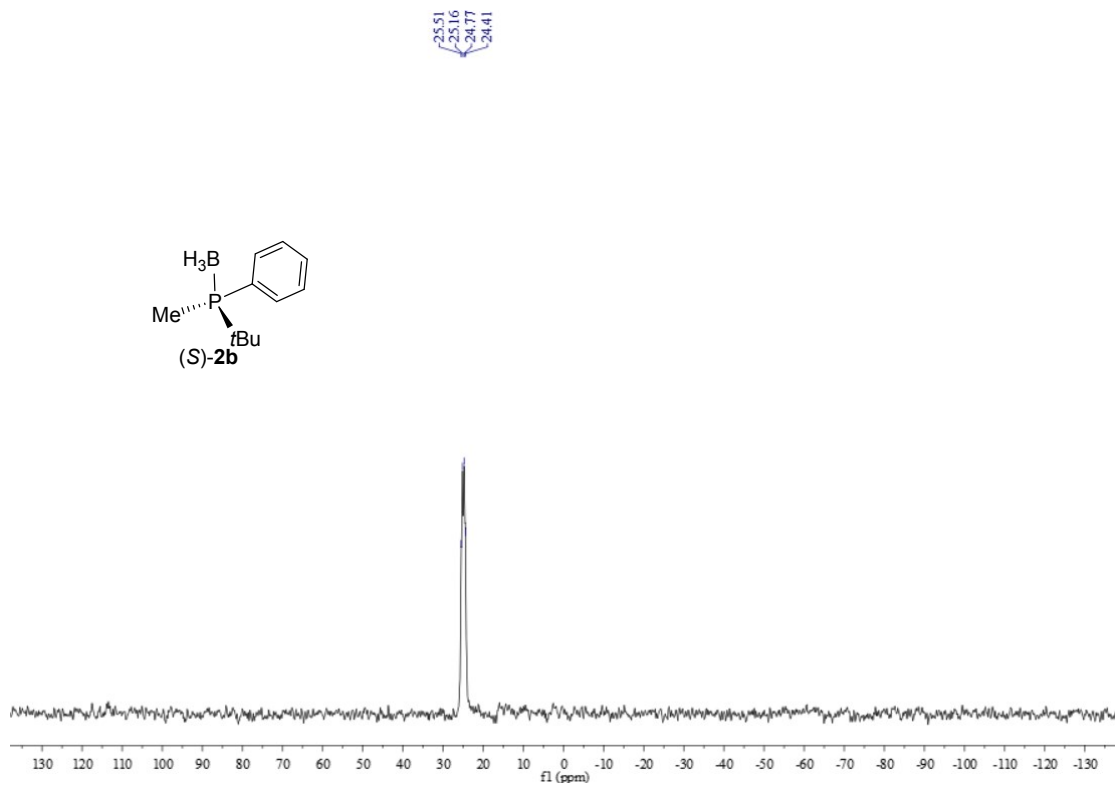

Figure S96. <sup>31</sup>P NMR spectrum of (S)-2b in CDCl<sub>3</sub>



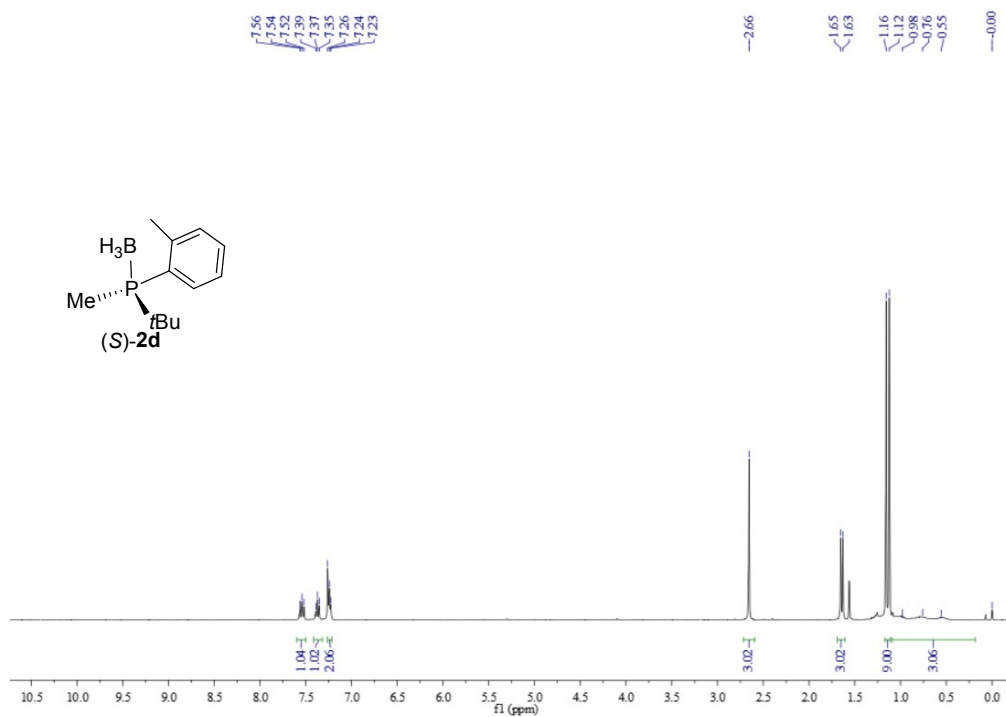

Figure S97. <sup>1</sup>H NMR spectrum of (S)-2d in CDCl<sub>3</sub>

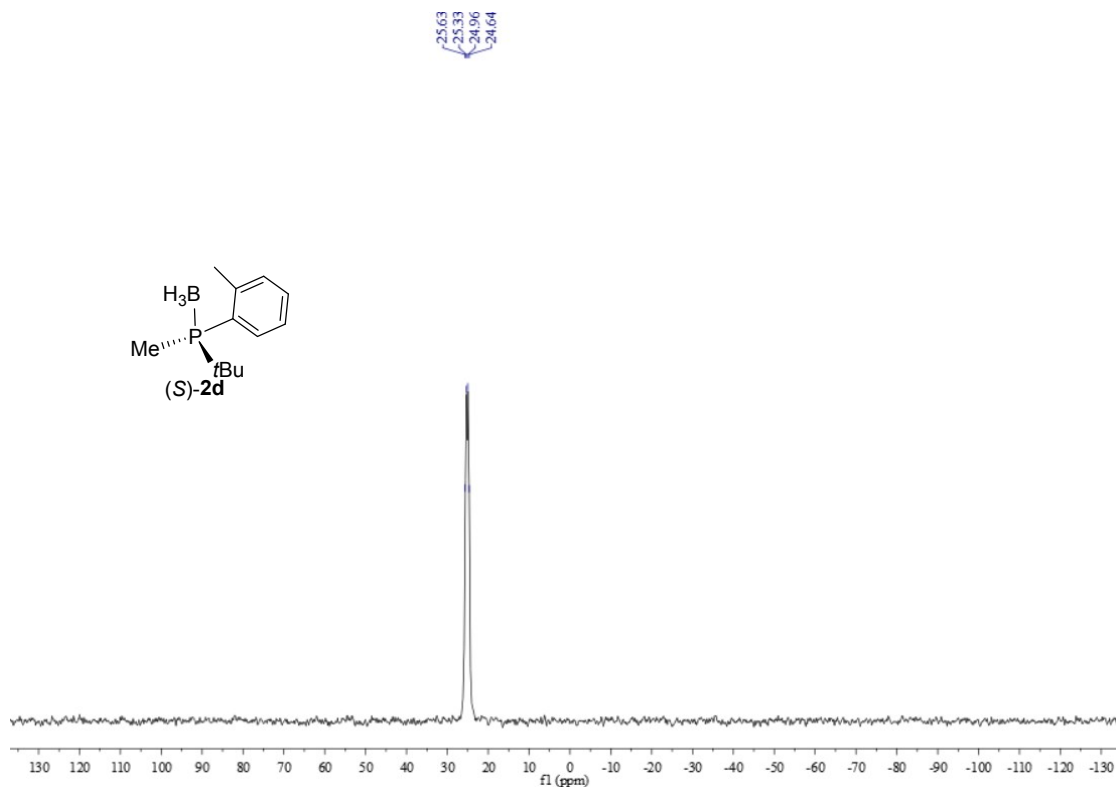

Figure S98. <sup>31</sup>P NMR spectrum of (S)-2d in CDCl<sub>3</sub>

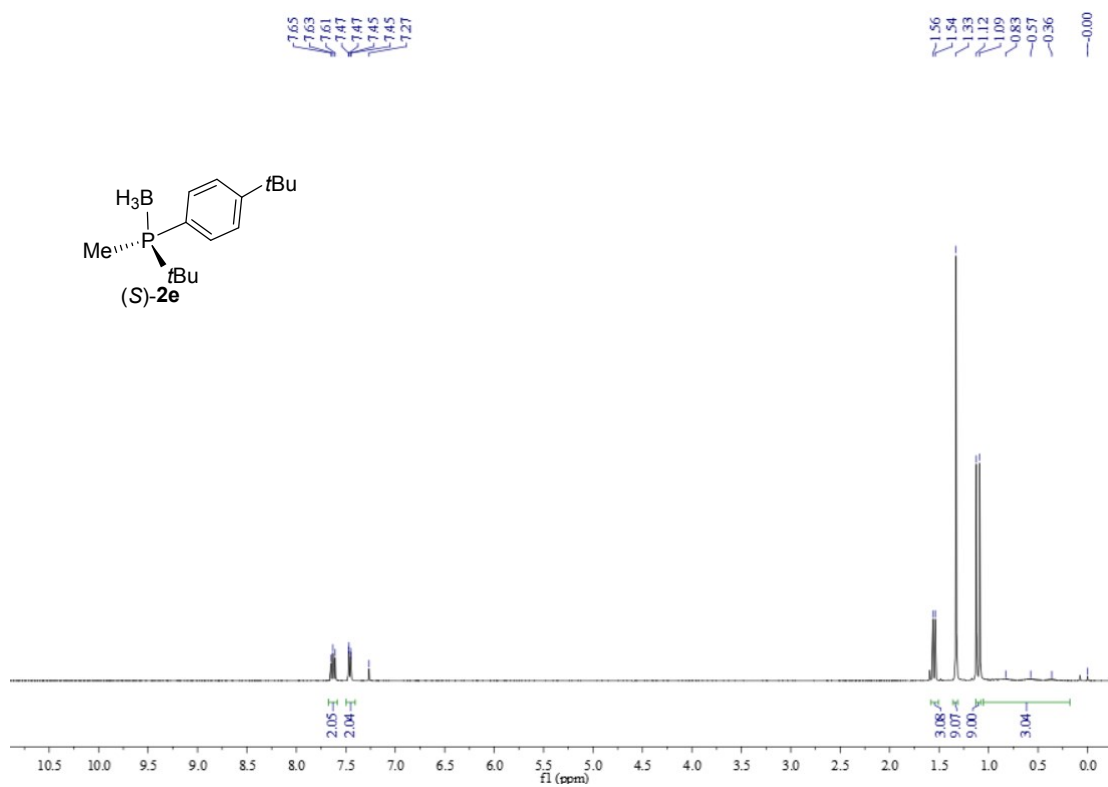

Figure S99. <sup>1</sup>H NMR spectrum of (S)-2e in CDCl<sub>3</sub>

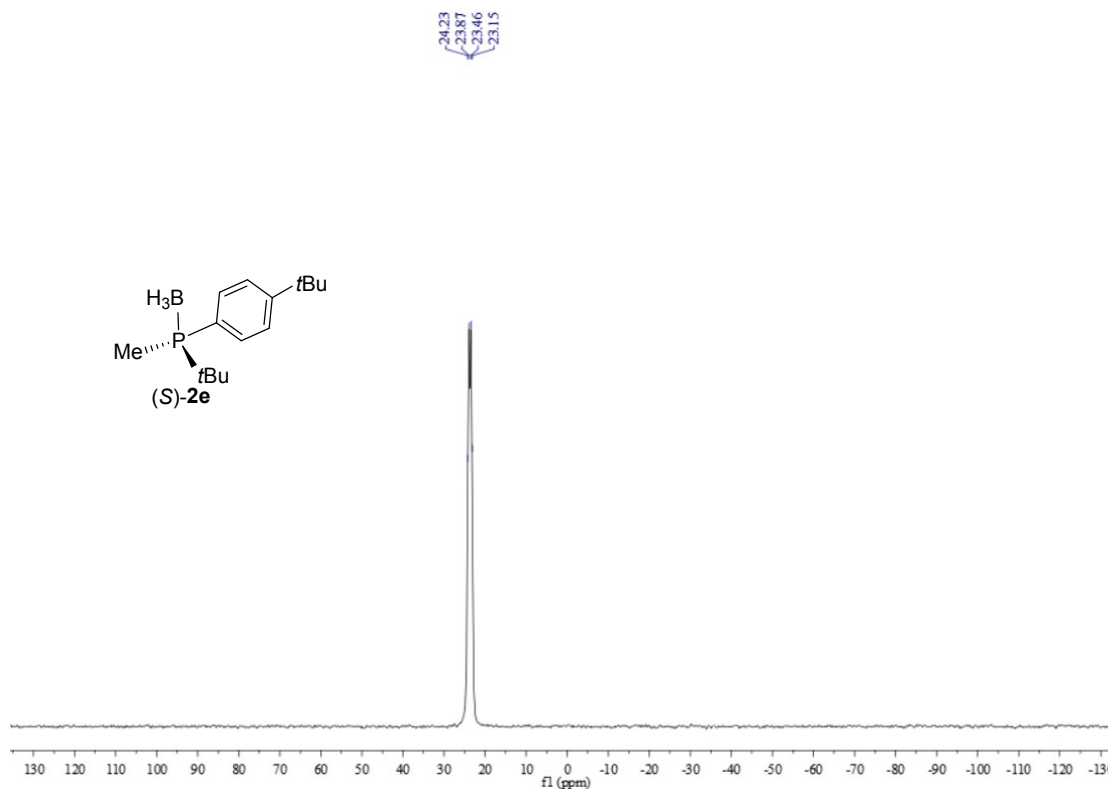

Figure S100. <sup>31</sup>P NMR spectrum of (S)-2e in CDCl<sub>3</sub>

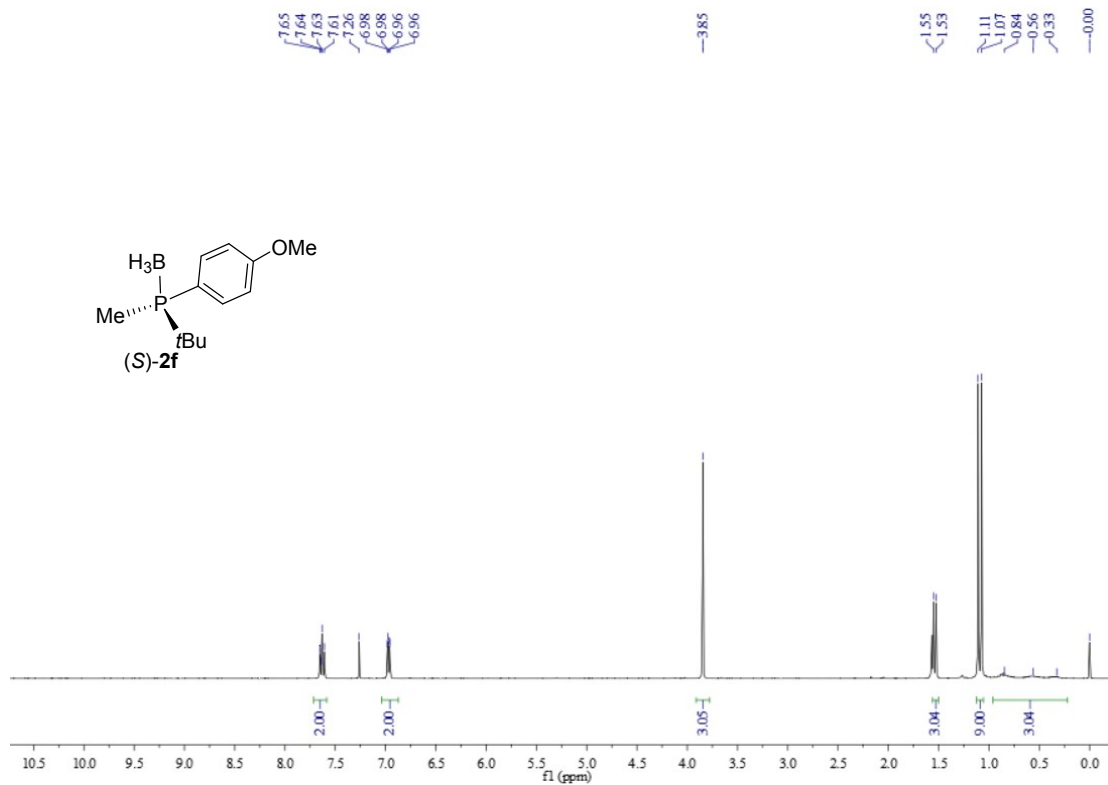

Figure S101. <sup>1</sup>H NMR spectrum of (S)-2f in CDCl<sub>3</sub>

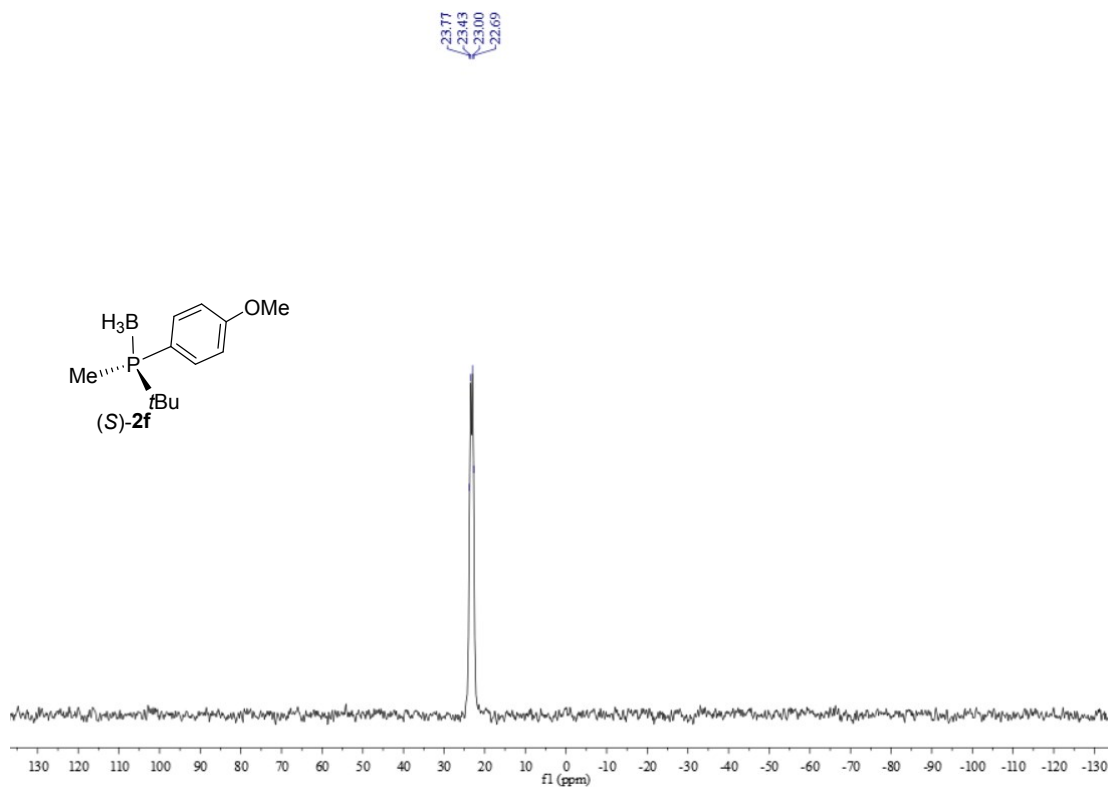

Figure S102. <sup>31</sup>P NMR spectrum of (S)-2f in CDCl<sub>3</sub>

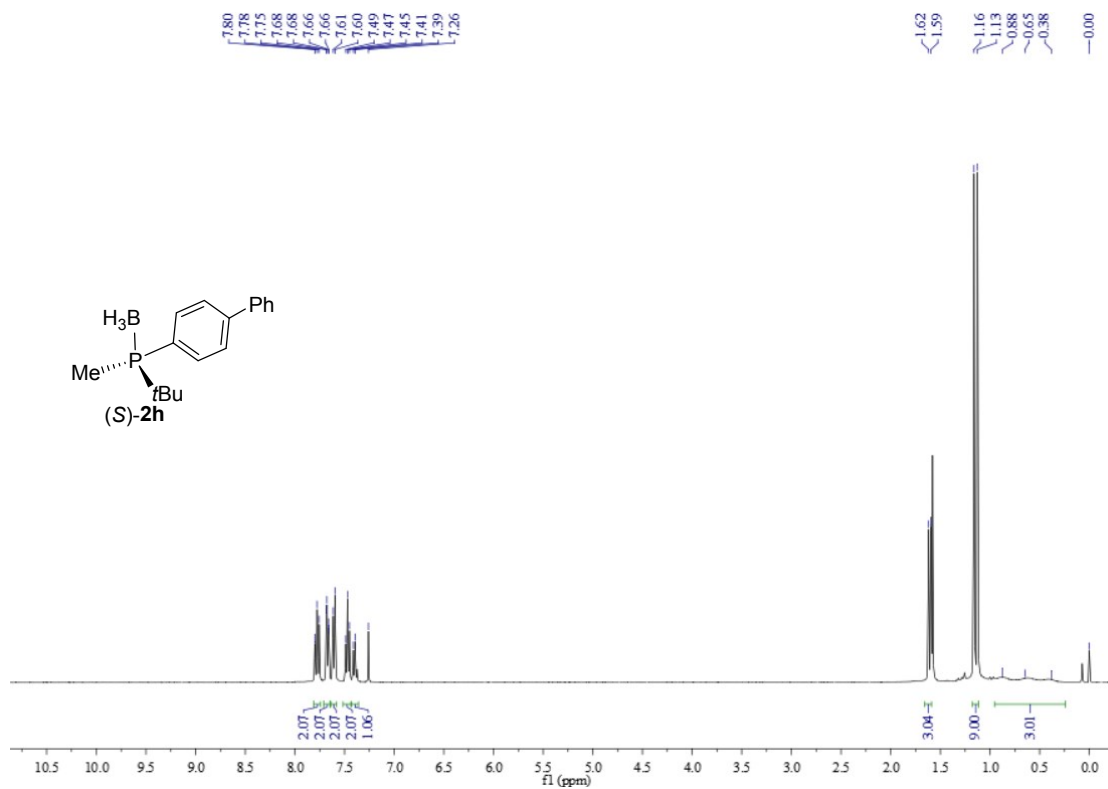

Figure S103. <sup>1</sup>H NMR spectrum of (S)-2h in CDCl<sub>3</sub>

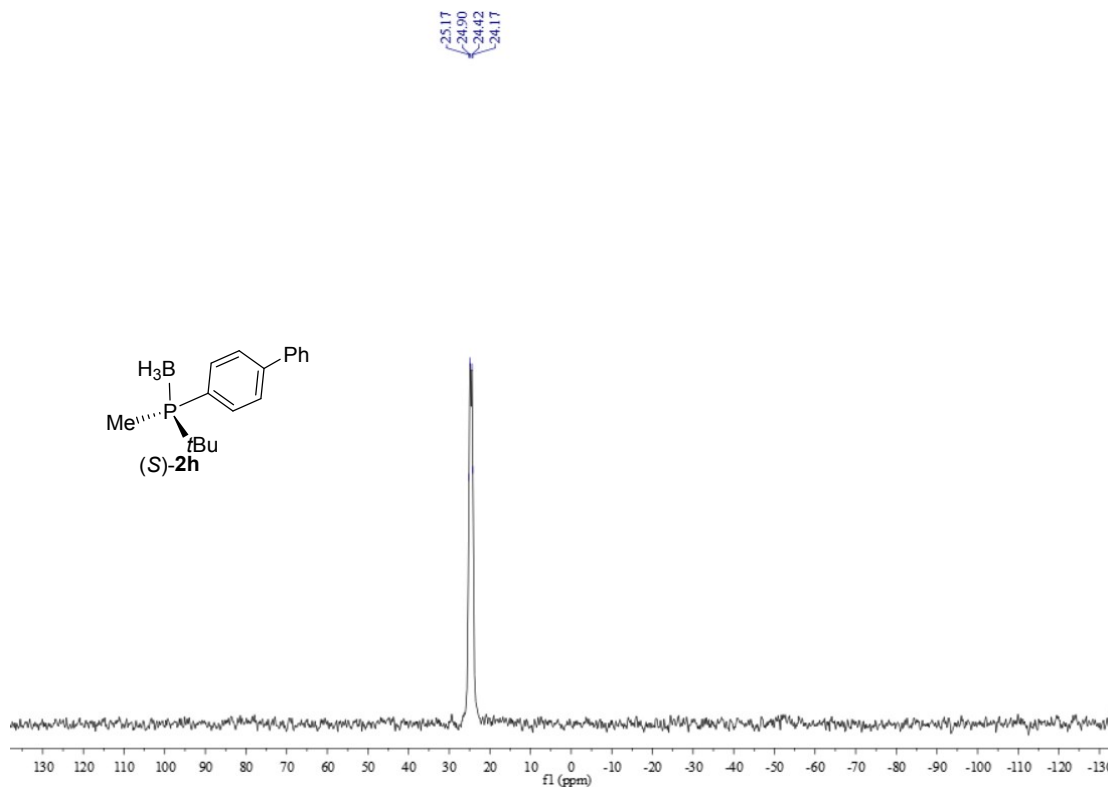

Figure S104. <sup>31</sup>P NMR spectrum of (S)-2h in CDCl<sub>3</sub>

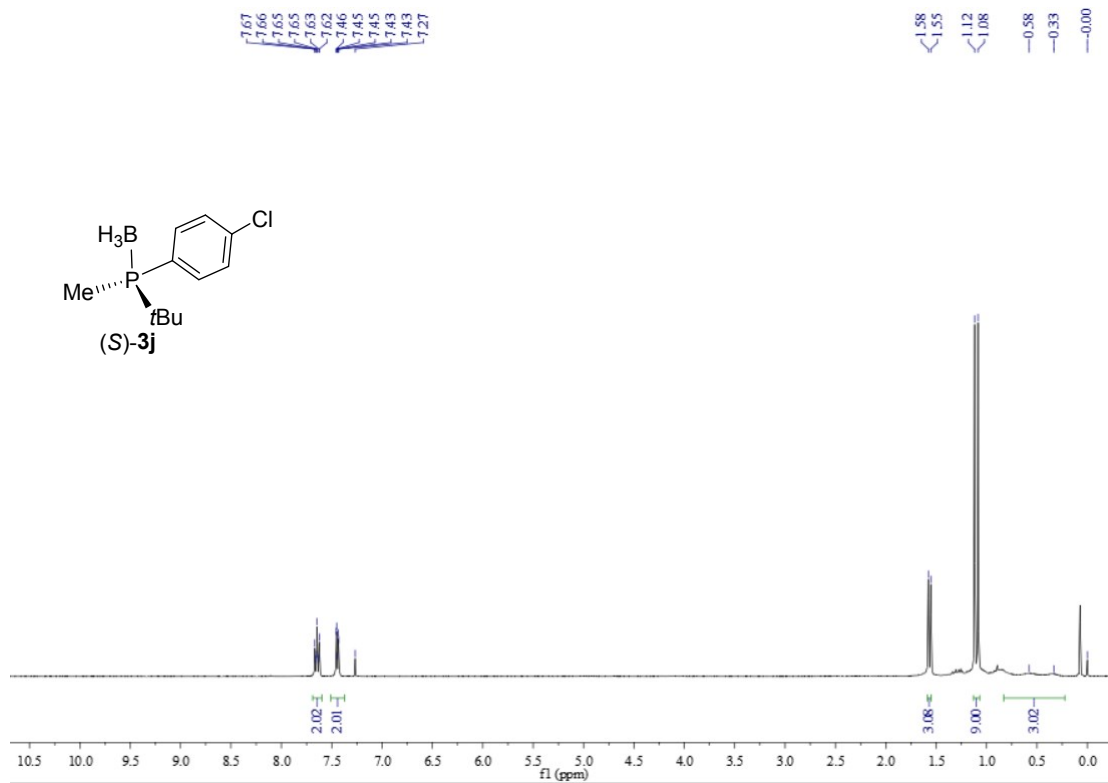

Figure S105. <sup>1</sup>H NMR spectrum of (S)-3j in CDCl<sub>3</sub>

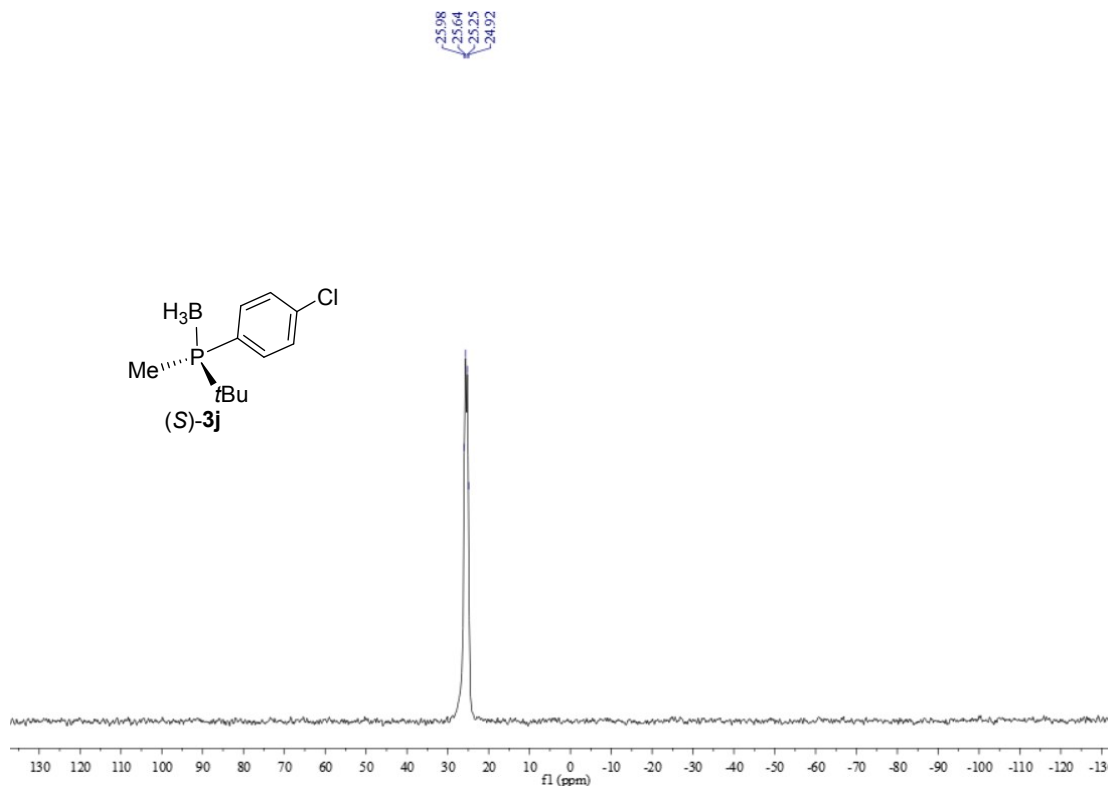

Figure S106. <sup>31</sup>P NMR spectrum of (S)-3j in CDCl<sub>3</sub>

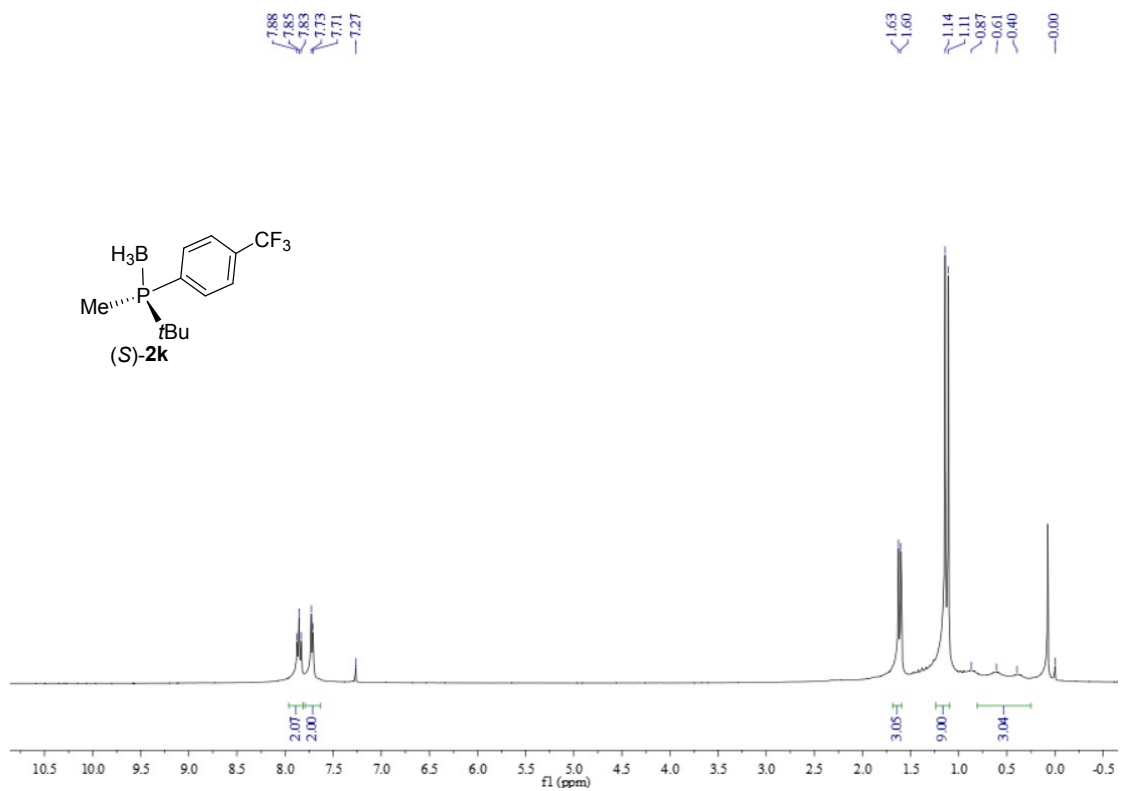

Figure S107. <sup>1</sup>H NMR spectrum of (S)-2k in CDCl<sub>3</sub>

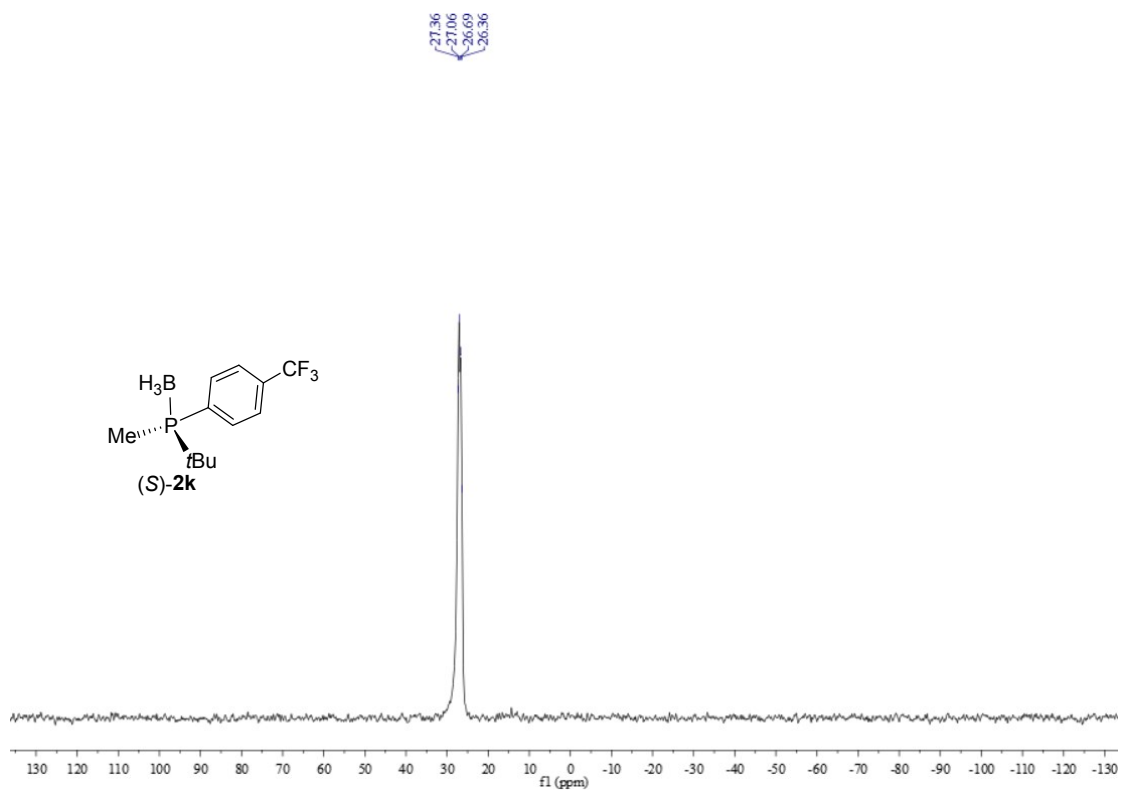

Figure S108. <sup>31</sup>P NMR spectrum of (S)-2k in CDCl<sub>3</sub>

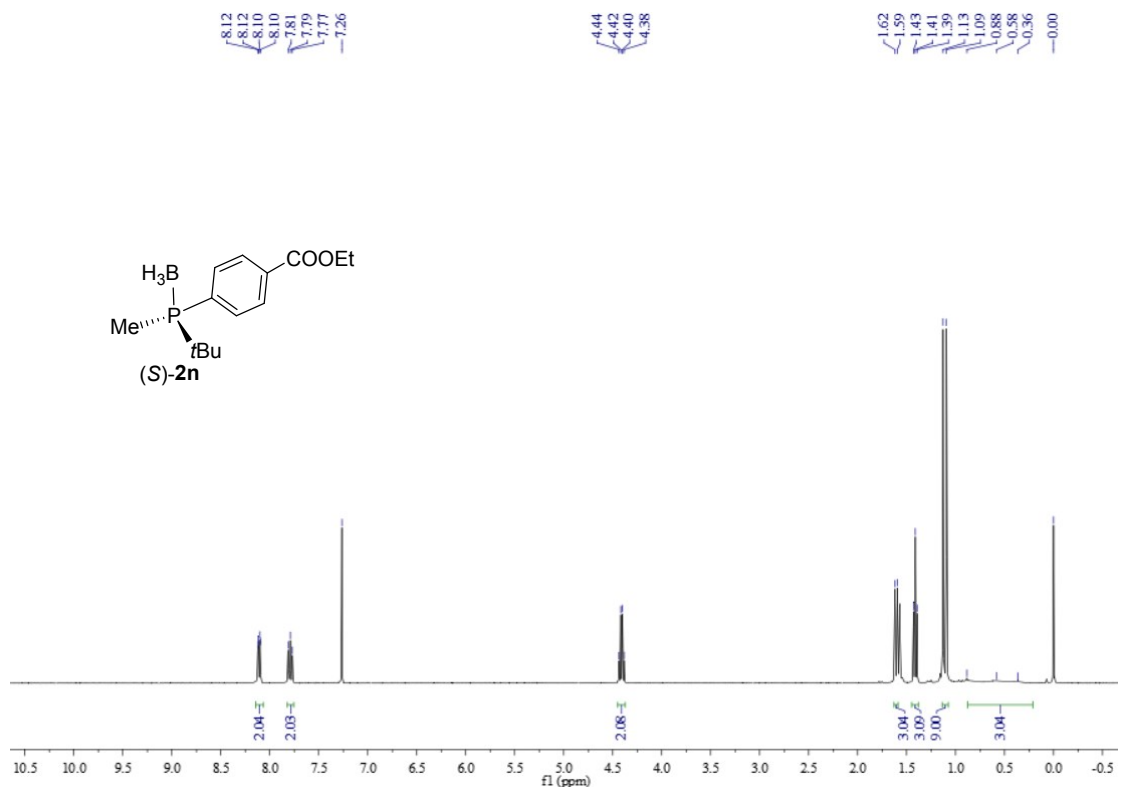

Figure S109. <sup>1</sup>H NMR spectrum of (S)-2n in CDCl<sub>3</sub>

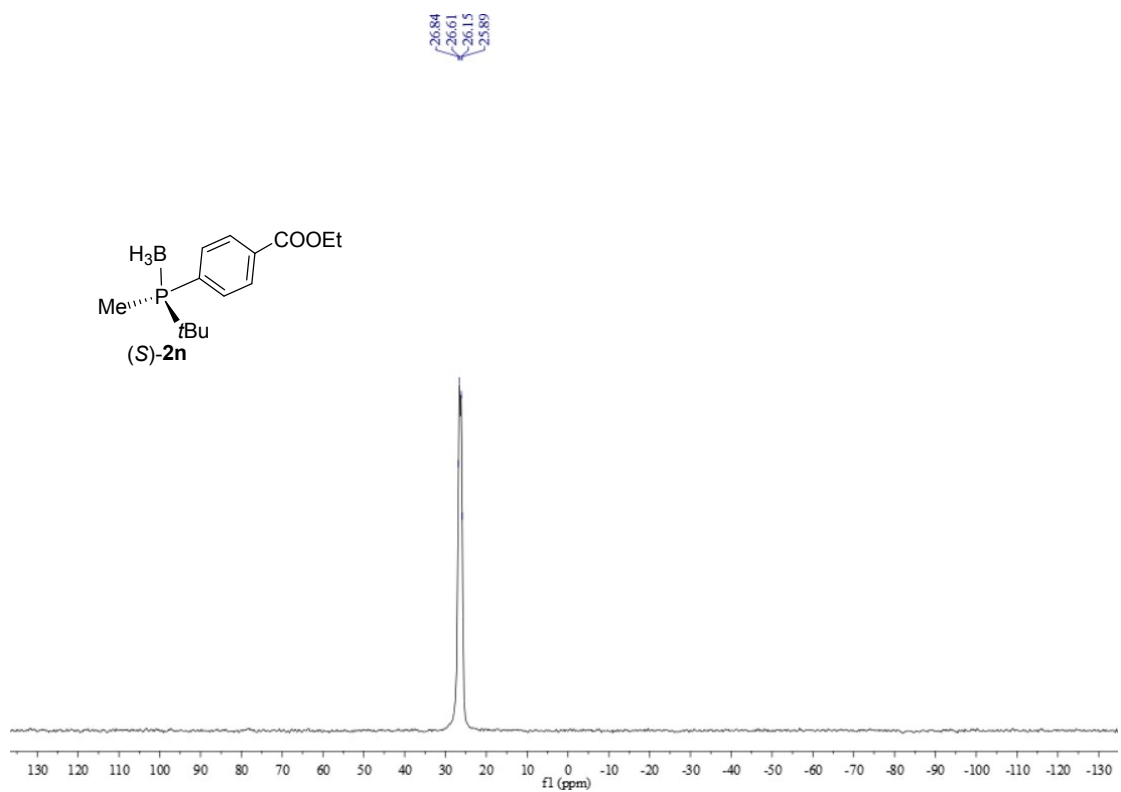

Figure S110. <sup>31</sup>P NMR spectrum of (S)-2n in CDCl<sub>3</sub>

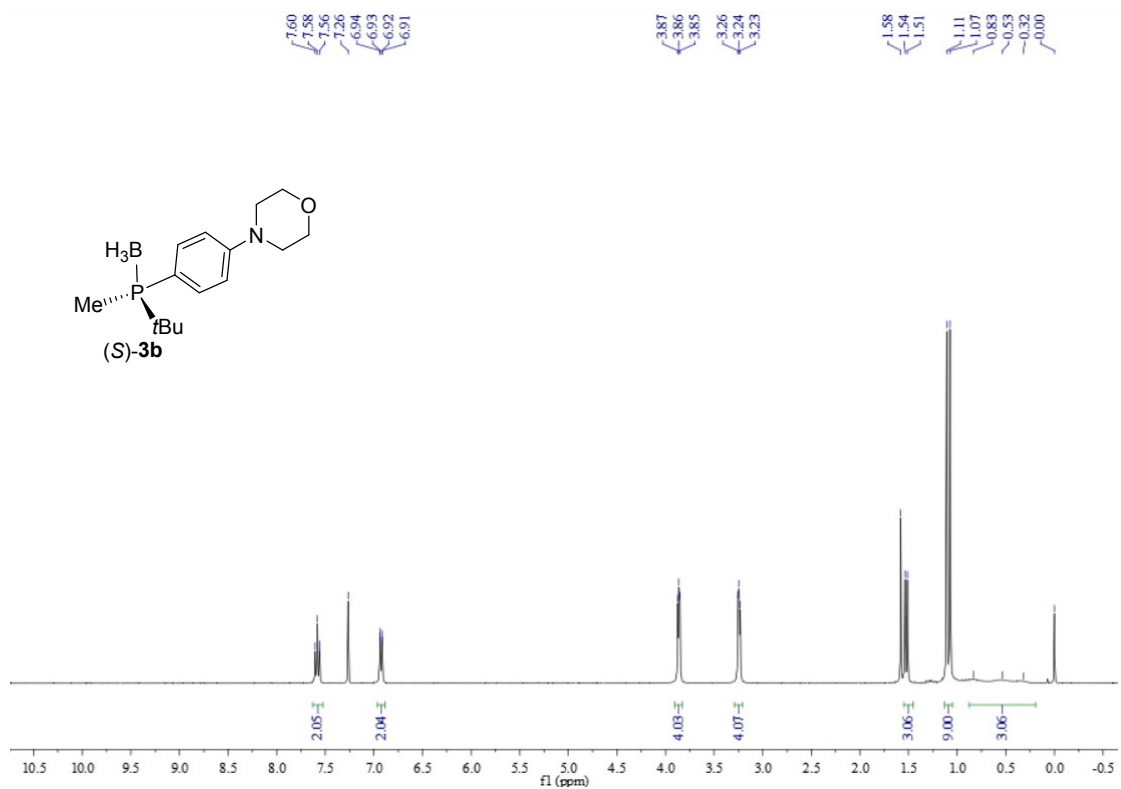

Figure S111. <sup>1</sup>H NMR spectrum of (S)-3b in CDCl<sub>3</sub>

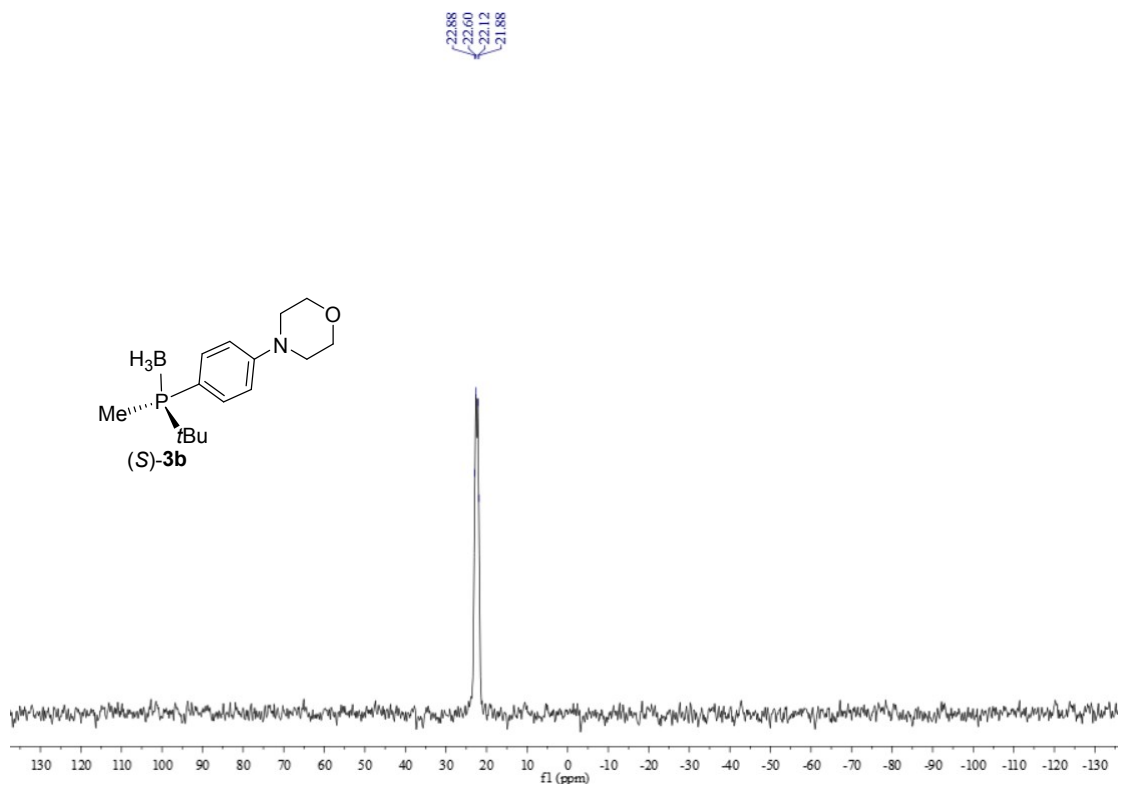

Figure S112. <sup>31</sup>P NMR spectrum of (S)-3b in CDCl<sub>3</sub>



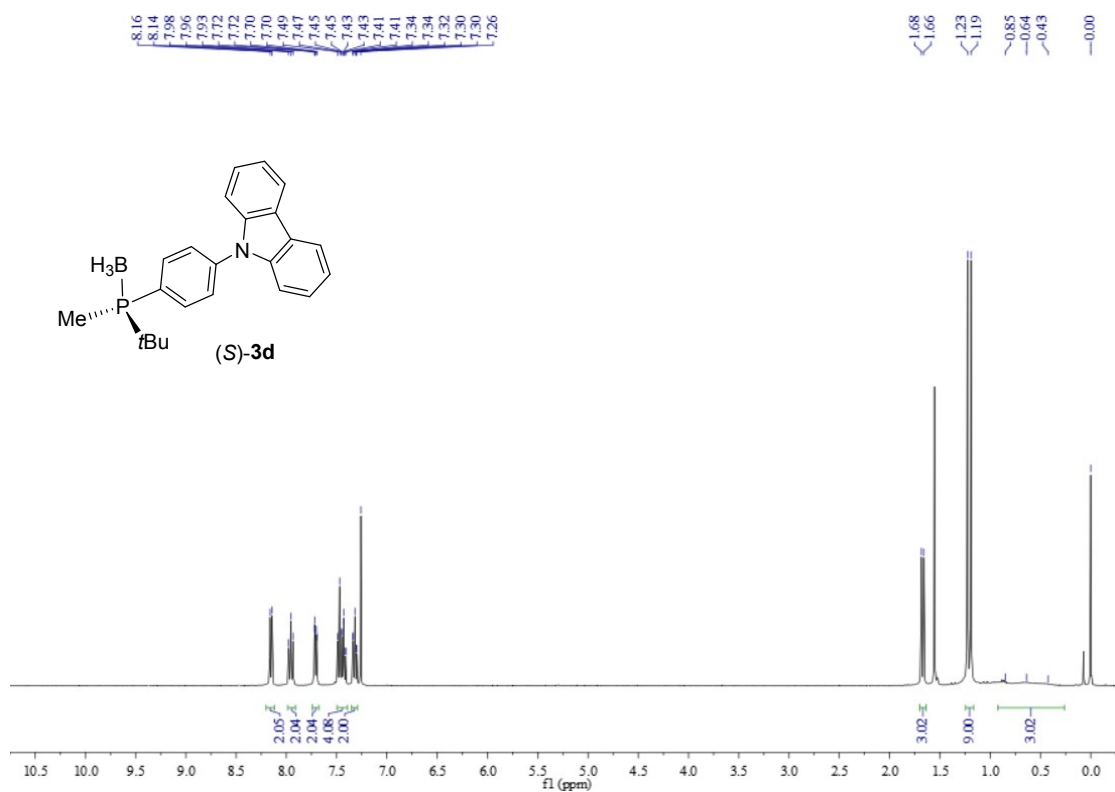

Figure S113. <sup>1</sup>H NMR spectrum of (S)-3d in CDCl<sub>3</sub>

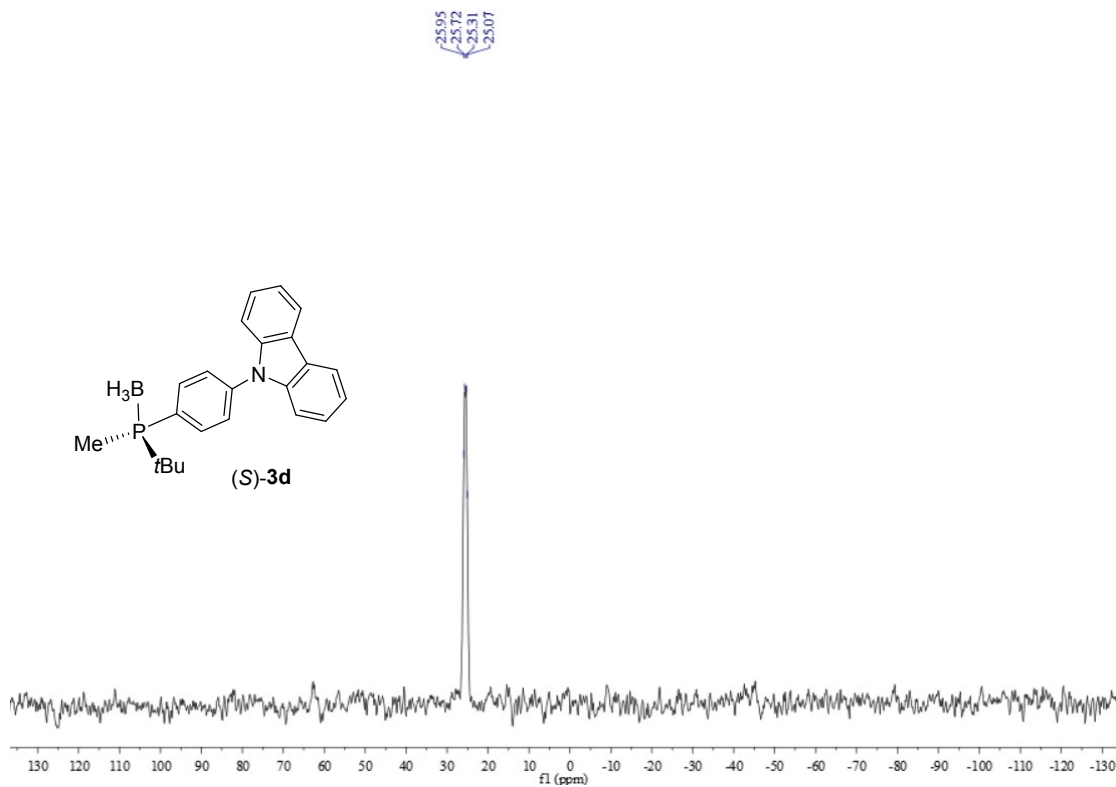

Figure S114. <sup>31</sup>P NMR spectrum of (S)-3d in CDCl<sub>3</sub>

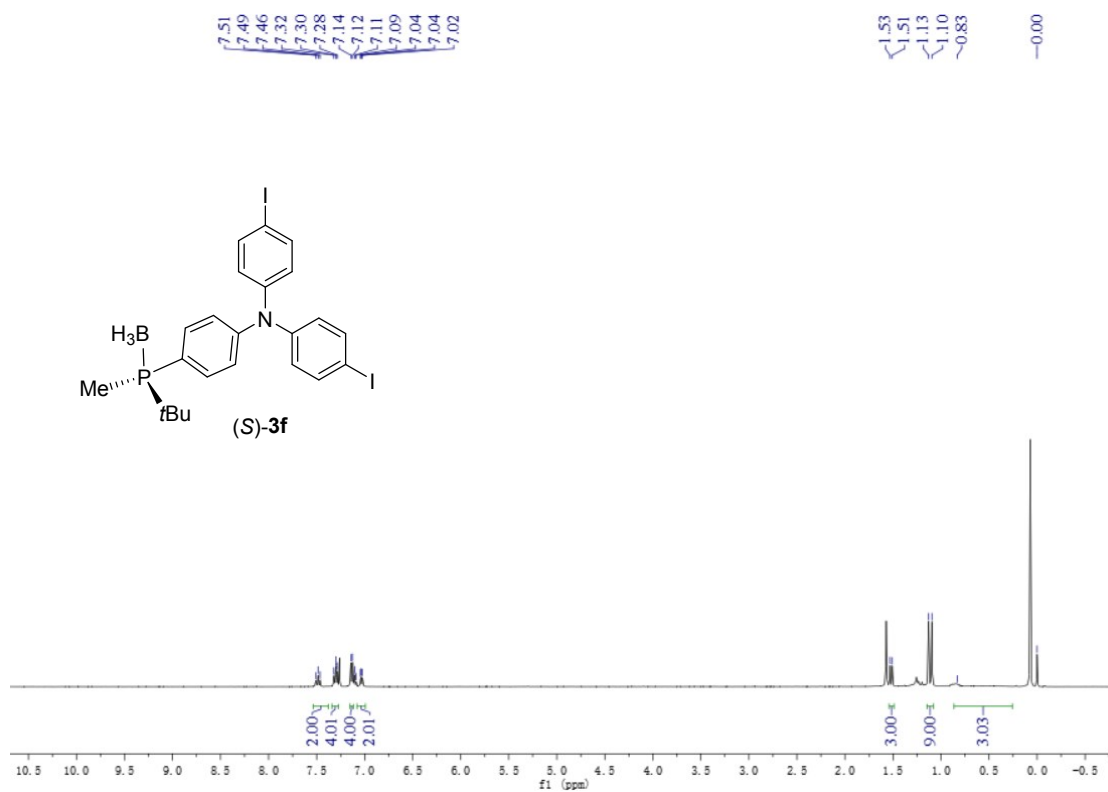

Figure S115. <sup>1</sup>H NMR spectrum of (S)-3f in CDCl<sub>3</sub>

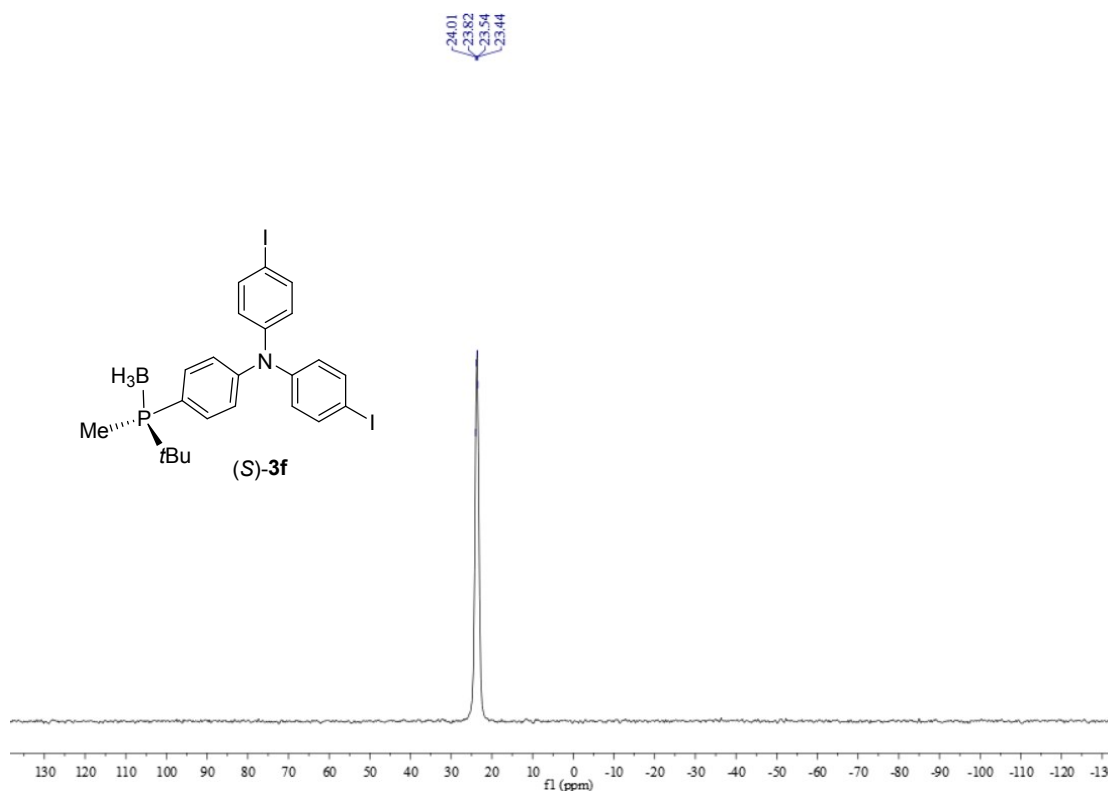

Figure S116. <sup>31</sup>P NMR spectrum of (S)-3f in CDCl<sub>3</sub>

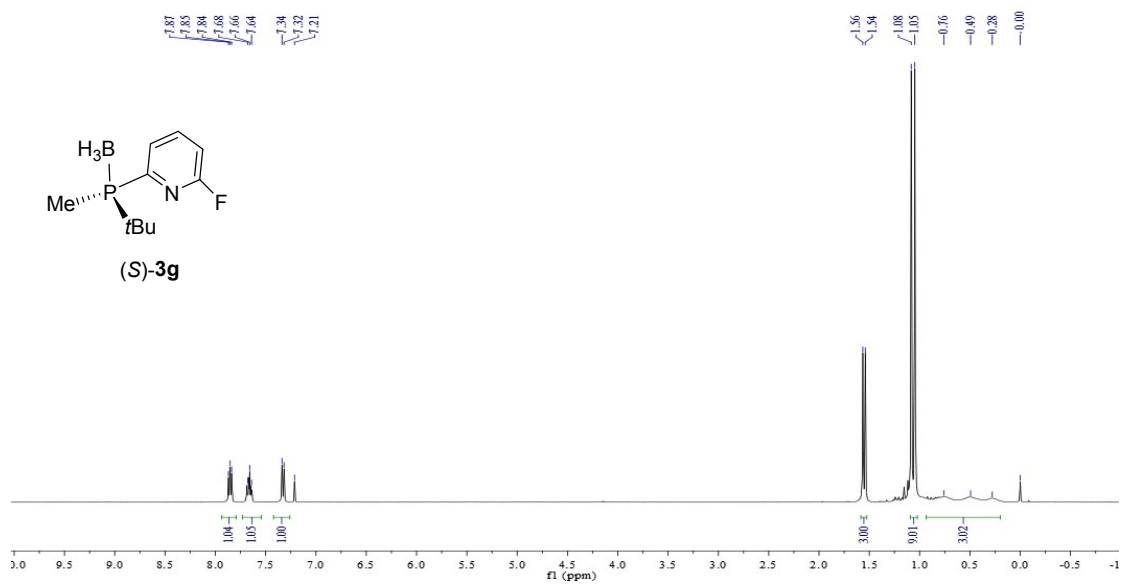

Figure S117. <sup>1</sup>H NMR spectrum of (S)-3g in CDCl<sub>3</sub>

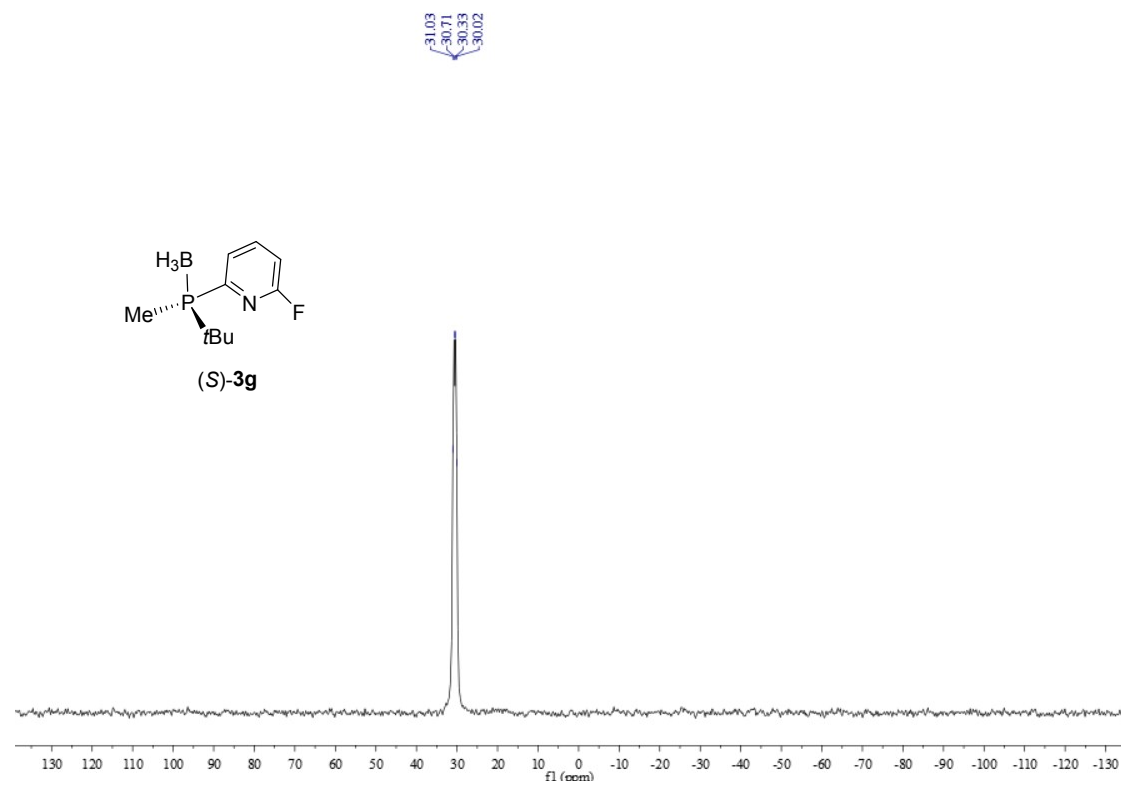

Figure S118. <sup>31</sup>P NMR spectrum of (S)-3g in CDCl<sub>3</sub>

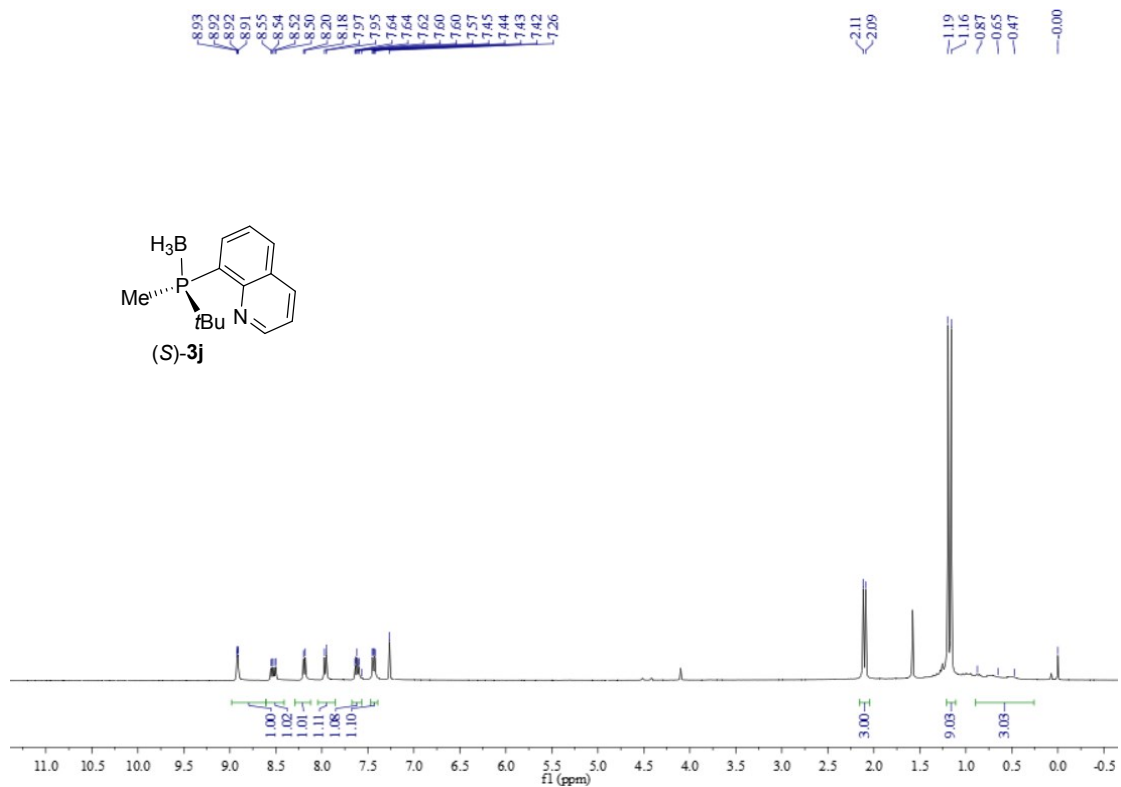

Figure S119. <sup>1</sup>H NMR spectrum of (S)-3j in CDCl<sub>3</sub>

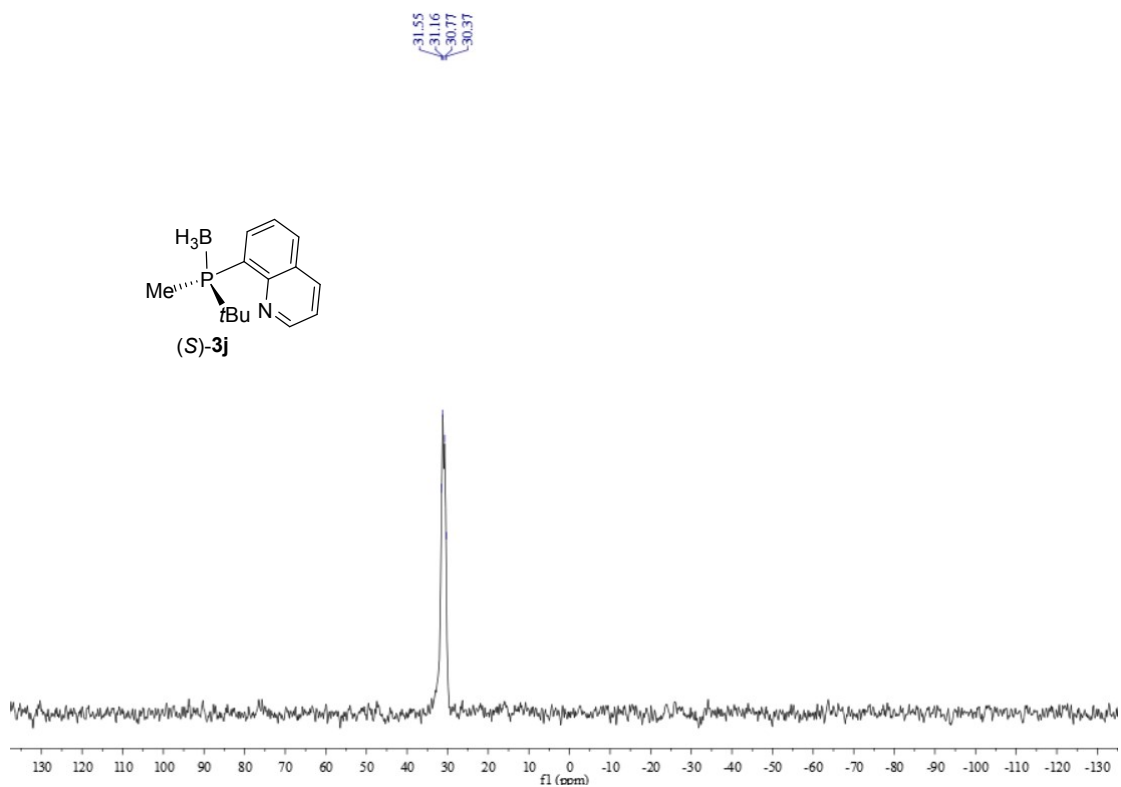

Figure S120. <sup>31</sup>P NMR spectrum of (S)-3j in CDCl<sub>3</sub>

## 7. HPLC spectra for all products.

### Chiral HPLC chromatographic analysis of (R)-2a

Condition: Daicel Chiralcel AS-H, *n*-hexane/*i*-PrOH = 95/5, UV = 250 nm, flow rate: 1.0 mL/min, retention time: t (minor) = 5.452 min, t (major) = 6.546 min, ee = 91%.

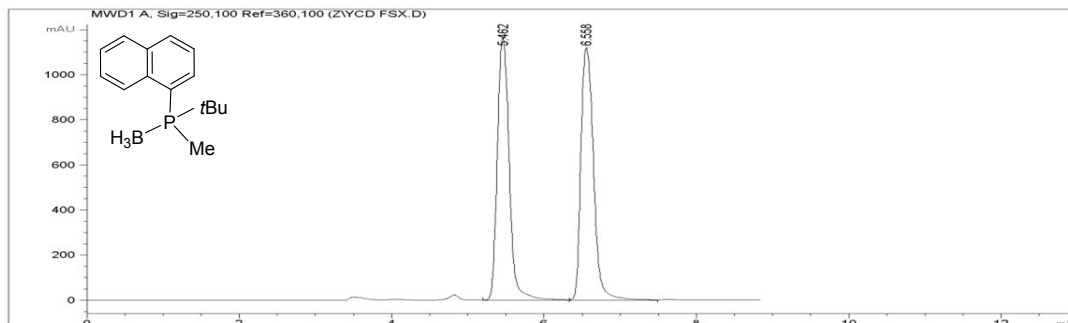

| Peak # | RetTime [min] | Type | Width [min] | Area [mAU*s] | Height [mAU] | Area %  |
|--------|---------------|------|-------------|--------------|--------------|---------|
| 1      | 5.462         | EV   | 0.1747      | 1.26782e4    | 1167.53125   | 49.5061 |
| 2      | 6.558         | VV   | 0.1865      | 1.29312e4    | 1121.50928   | 50.4939 |

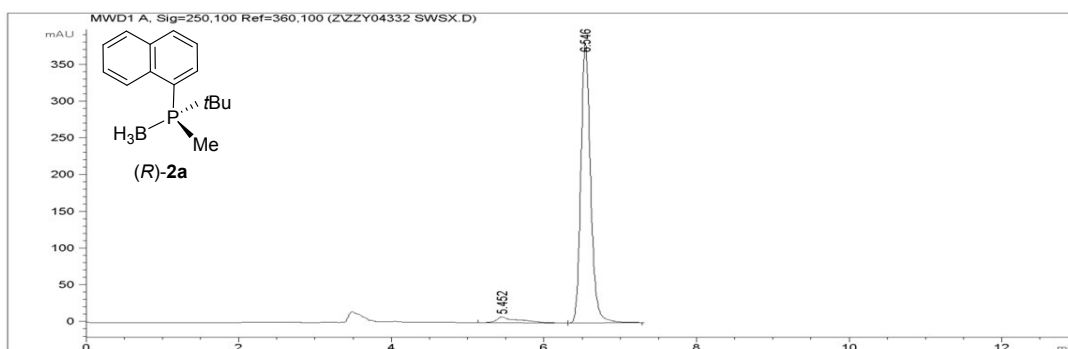

| Peak # | RetTime [min] | Type | Width [min] | Area [mAU*s] | Height [mAU] | Area %  |
|--------|---------------|------|-------------|--------------|--------------|---------|
| 1      | 5.452         | VV   | 0.2598      | 158.49107    | 7.97658      | 4.4623  |
| 2      | 6.546         | VB   | 0.1358      | 3393.25806   | 381.34229    | 95.5377 |

### Chiral HPLC chromatographic analysis of (S)-2a

Condition: Daicel Chiralcel AS-H, *n*-hexane/*i*-PrOH = 95/5, UV = 250 nm, flow rate: 1.0 mL/min, retention time: t (major) = 5.430 min, ee = 99%.

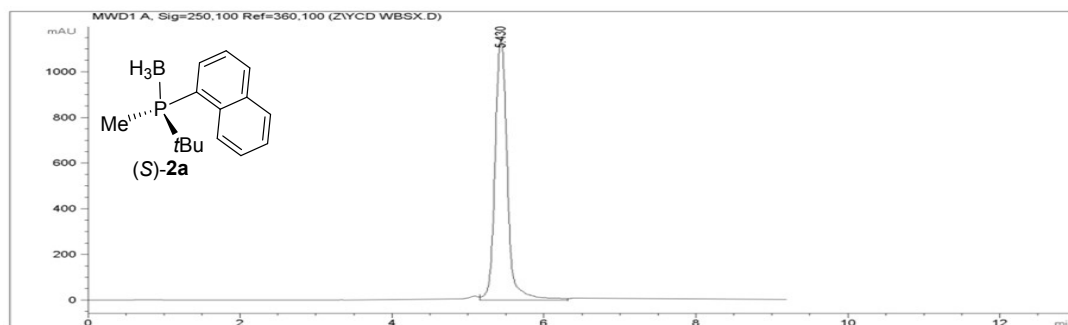

| Peak # | RetTime [min] | Type | Width [min] | Area [mAU*s] | Height [mAU] | Area %   |
|--------|---------------|------|-------------|--------------|--------------|----------|
| 1      | 5.430         | VV   | 0.1771      | 1.28394e4    | 1142.25513   | 100.0000 |

### Chiral HPLC chromatographic analysis of (R)-2b

Condition: Daicel Chiralcel AS-H, *n*-hexane/*i*-PrOH = 95/5, UV = 254 nm, flow rate: 1.0 mL/min, retention time: t (minor) = 7.131 min, t (major) = 8.103 min, ee = 65%.

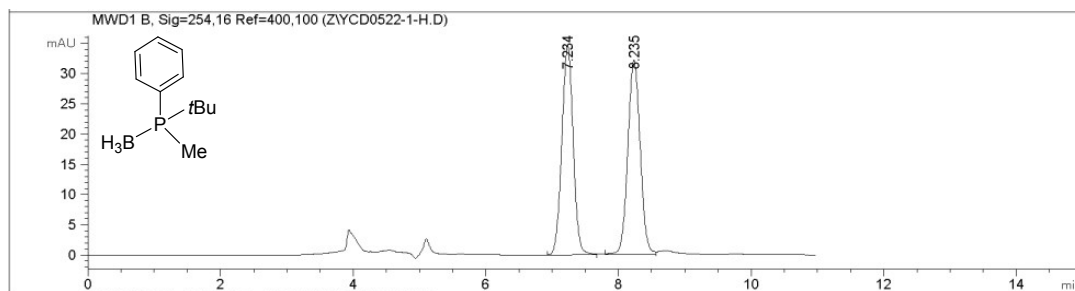

| Peak # | RetTime [min] | Type | Width [min] | Area [mAU*s] | Height [mAU] | Area %  |
|--------|---------------|------|-------------|--------------|--------------|---------|
| 1      | 7.234         | BB   | 0.1857      | 414.08304    | 34.58932     | 49.8892 |
| 2      | 8.235         | BV   | 0.2009      | 415.92221    | 32.14756     | 50.1108 |

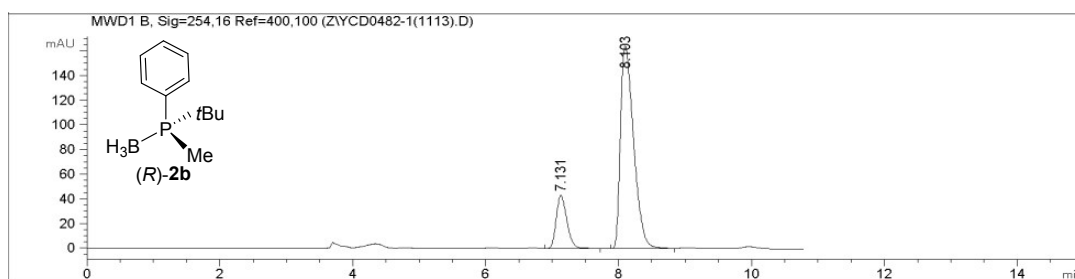

| Peak # | RetTime [min] | Type | Width [min] | Area [mAU*s] | Height [mAU] | Area %  |
|--------|---------------|------|-------------|--------------|--------------|---------|
| 1      | 7.131         | VB   | 0.1722      | 482.05902    | 43.19086     | 17.4976 |
| 2      | 8.103         | BV   | 0.2155      | 2272.93848   | 164.24651    | 82.5024 |

### Chiral HPLC chromatographic analysis of (S)-2b

Condition: Daicel Chiralcel AS-H, *n*-hexane/*i*-PrOH = 95/5, UV = 230 nm, flow rate: 1.0 mL/min, retention time: t (major) = 7.908 min, t (minor) = 8.829 min, ee = 99%.

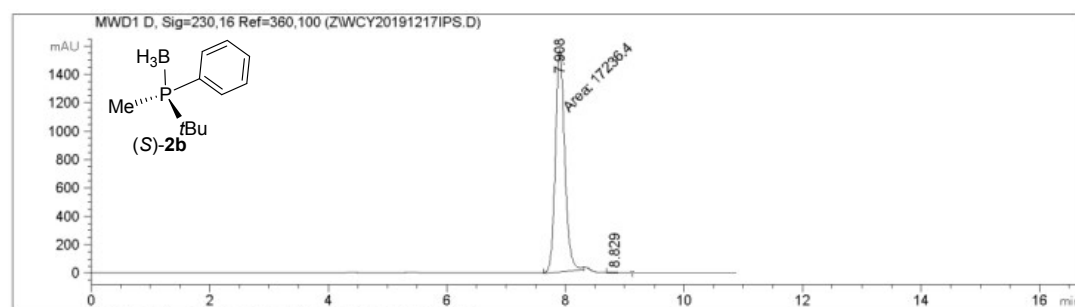

| Peak # | RetTime [min] | Type | Width [min] | Area [mAU*s] | Height [mAU] | Area %  |
|--------|---------------|------|-------------|--------------|--------------|---------|
| 1      | 7.908         | MM   | 0.1832      | 1.72364e4    | 1568.28149   | 99.5125 |
| 2      | 8.829         | VBA  | 0.2526      | 84.43401     | 4.67756      | 0.4875  |

Chiral HPLC chromatographic analysis of (*R*)-**2c**

Condition: Daicel Chiralcel AS-H, *n*-hexane/*i*-PrOH = 95/5, UV = 220 nm, flow rate: 1.0 mL/min, retention time: t (minor) = 4.240 min, t (major) = 5.678 min, ee = 94%.

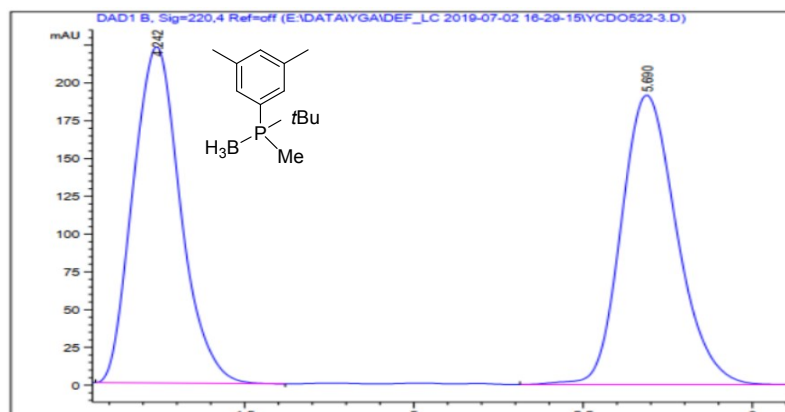

| 峰 # | 保留时间 [min] | 类型 | 峰宽 [min] | 峰面积 [mAU*s] | 峰高 [mAU]  | 峰面积 %   |
|-----|------------|----|----------|-------------|-----------|---------|
| 1   | 4.242      | BB | 0.1538   | 2173.64209  | 222.77597 | 49.9249 |
| 2   | 5.690      | BB | 0.1767   | 2180.18311  | 191.62512 | 50.0751 |

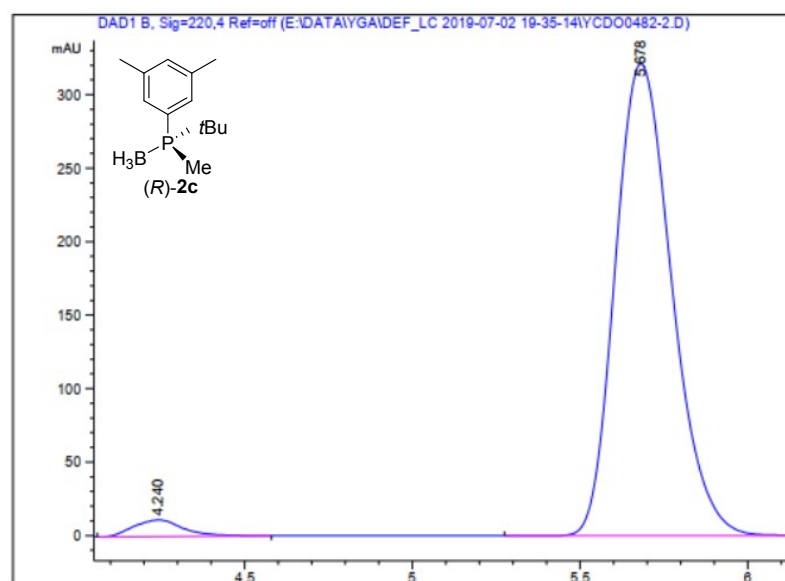

| 峰 # | 保留时间 [min] | 类型 | 峰宽 [min] | 峰面积 [mAU*s] | 峰高 [mAU]  | 峰面积 %   |
|-----|------------|----|----------|-------------|-----------|---------|
| 1   | 4.240      | BB | 0.1654   | 115.81202   | 11.31580  | 2.9885  |
| 2   | 5.678      | BB | 0.1845   | 3759.42749  | 321.34906 | 97.0115 |

### Chiral HPLC chromatographic analysis of (R)-2d

Condition: Daicel Chiralcel OD-H, *n*-hexane/*i*-PrOH = 98/2, UV = 230 nm, flow rate: 0.5 mL/min, retention time: t (minor) = 12.580 min, t (major) = 14.134 min, ee = 90%.

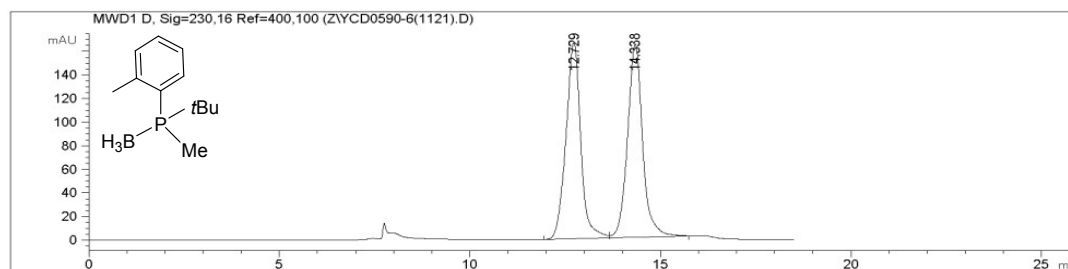

| Peak # | RetTime [min] | Type | Width [min] | Area [mAU*s] | Height [mAU] | Area %  |
|--------|---------------|------|-------------|--------------|--------------|---------|
| 1      | 12.729        | EV   | 0.4050      | 4483.72070   | 166.06494    | 49.8103 |
| 2      | 14.338        | VB   | 0.4196      | 4517.87354   | 163.88429    | 50.1897 |

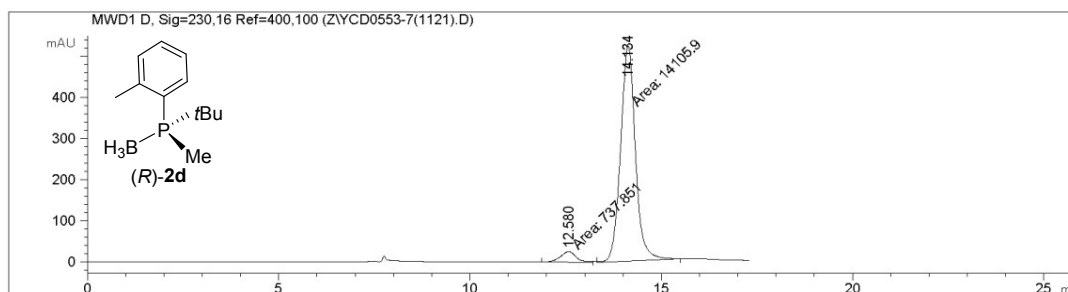

| Peak # | RetTime [min] | Type | Width [min] | Area [mAU*s] | Height [mAU] | Area %  |
|--------|---------------|------|-------------|--------------|--------------|---------|
| 1      | 12.580        | MM   | 0.4788      | 737.85126    | 25.68179     | 4.9708  |
| 2      | 14.134        | MM   | 0.4498      | 1.41059e4    | 522.70612    | 95.0292 |

### Chiral HPLC chromatographic analysis of (S)-2d

Condition: Daicel Chiralcel OD-H, *n*-hexane/*i*-PrOH = 98/2, UV = 230 nm, flow rate: 0.5 mL/min, retention time: t (major) = 13.211 min, t (minor) = 14.302 min, ee = 92%.

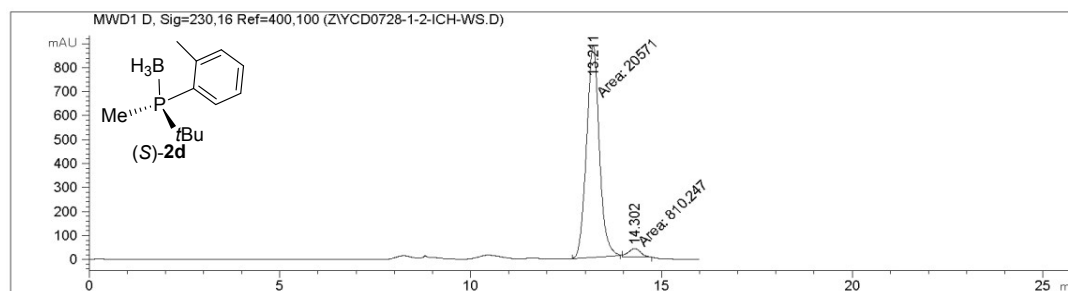

| Peak # | RetTime [min] | Type | Width [min] | Area [mAU*s] | Height [mAU] | Area %  |
|--------|---------------|------|-------------|--------------|--------------|---------|
| 1      | 13.211        | MM   | 0.3883      | 2.05710e4    | 883.04315    | 96.2105 |
| 2      | 14.302        | MM   | 0.3746      | 810.24664    | 36.04960     | 3.7895  |



### Chiral HPLC chromatographic analysis of (R)-2e

Condition: Daicel Chiralcel AS-H, *n*-hexane/*i*-PrOH = 99/1, UV = 234 nm, flow rate: 1 mL/min, retention time: t (major) = 5.365 min, t (minor) = 6.045 min, ee = 90%.

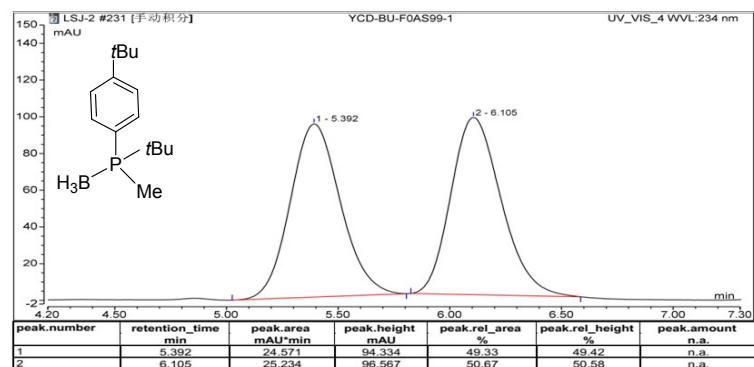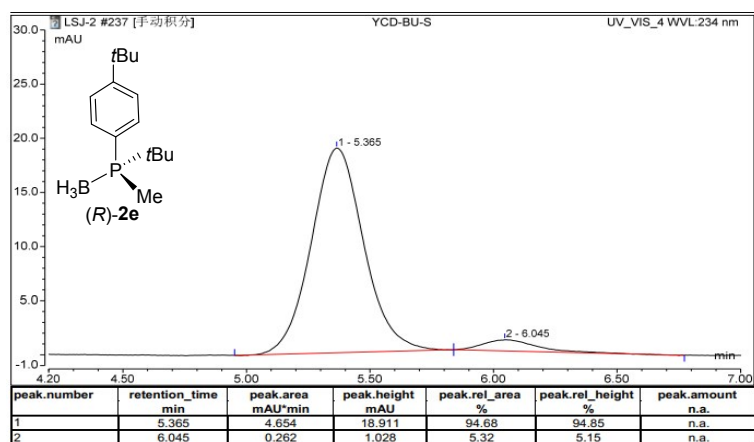

### Chiral HPLC chromatographic analysis of (S)-2e

Condition: Daicel Chiralcel AS-H, *n*-hexane/*i*-PrOH = 99/1, UV = 254 nm, flow rate: 1.0 mL/min, retention time: t (minor) = 4.992 min, t (major) = 5.519 min, ee = 88%.

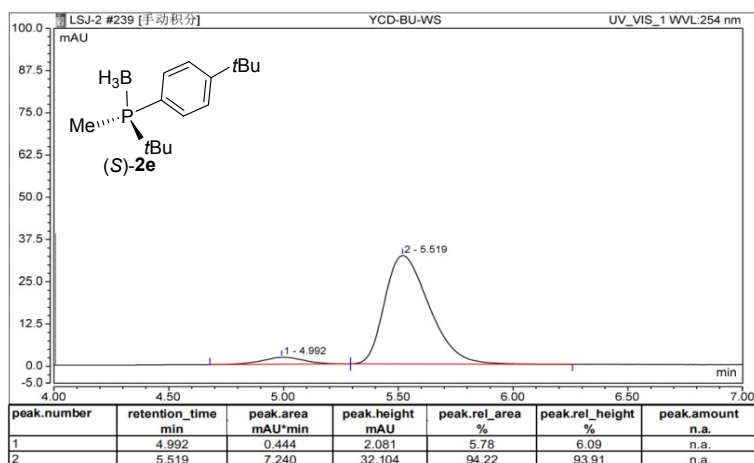

### Chiral HPLC chromatographic analysis of (R)-2f

Condition: Daicel Chiralcel AS-H, *n*-hexane/*i*-PrOH = 98/2, UV = 250 nm, flow rate: 0.8 mL/min, retention time: t (minor) = 21.843 min, t (major) = 23.093 min, ee = 98%.

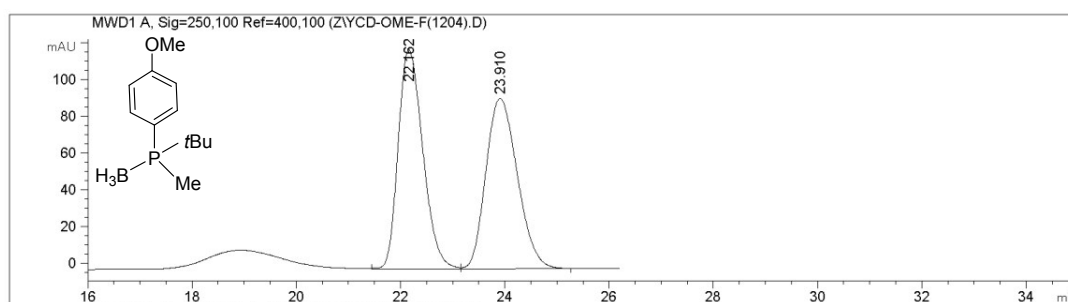

| Peak # | RetTime [min] | Type | Width [min] | Area [mAU*s] | Height [mAU] | Area %  |
|--------|---------------|------|-------------|--------------|--------------|---------|
| 1      | 22.162        | BV   | 0.5093      | 3923.07373   | 119.42327    | 50.1856 |
| 2      | 23.910        | VB   | 0.6622      | 3894.06250   | 92.67391     | 49.8144 |

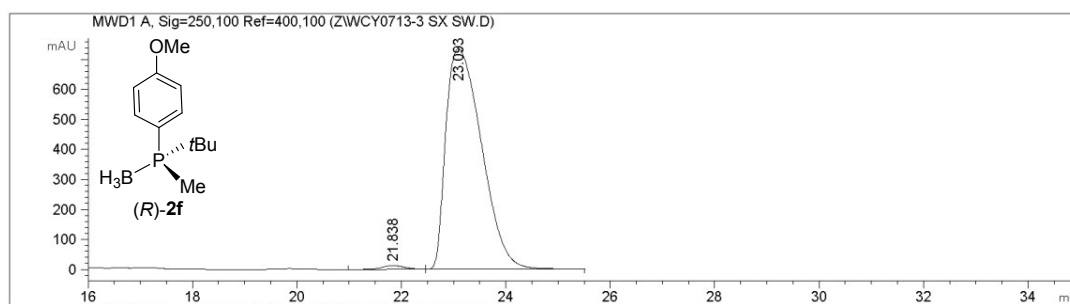

| Peak # | RetTime [min] | Type | Width [min] | Area [mAU*s] | Height [mAU] | Area %  |
|--------|---------------|------|-------------|--------------|--------------|---------|
| 1      | 21.843        | BV   | 0.4456      | 130.97234    | 4.47357      | 0.9432  |
| 2      | 23.093        | VB   | 0.6927      | 1.37556e4    | 311.77374    | 99.0568 |

### Chiral HPLC chromatographic analysis of (S)-2f

Condition: Daicel Chiralcel AS-H, *n*-hexane/*i*-PrOH = 98/2, UV = 250 nm, flow rate: 0.8 mL/min, retention time: t (major) = 21.932 min, t (minor) = 24.014 min, ee = 95%.

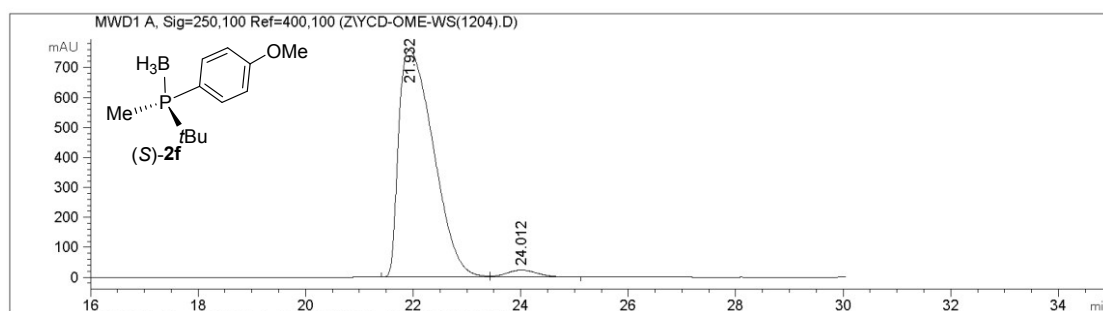

| Peak # | RetTime [min] | Type | Width [min] | Area [mAU*s] | Height [mAU] | Area %  |
|--------|---------------|------|-------------|--------------|--------------|---------|
| 1      | 21.932        | BB   | 0.6487      | 1.35912e4    | 327.13892    | 97.4981 |
| 2      | 24.014        | BB   | 0.6021      | 348.76962    | 8.69236      | 2.5019  |

Chiral HPLC chromatographic analysis of (*R*)-**2g**

Condition: Daicel Chiralcel AS-H, *n*-hexane/*i*-PrOH = 98/2, UV = 250 nm, flow rate: 1.0 mL/min, retention time: t (major) = 26.610 min, t (minor) = 34.227 min, ee = 89%.

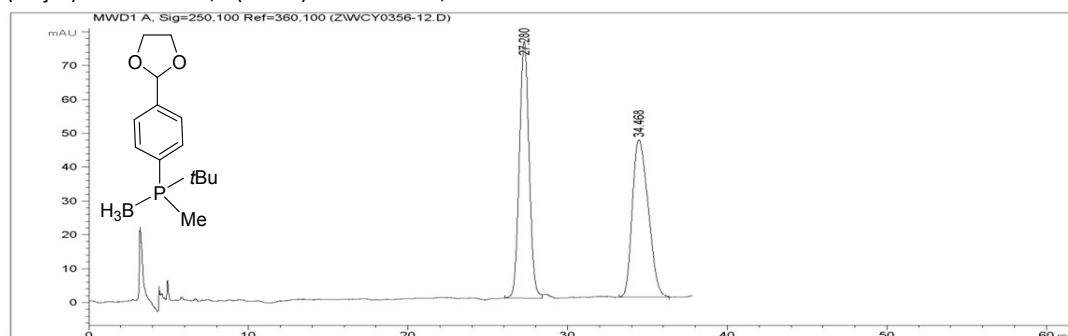

| Peak # | RetTime [min] | Type | Width [min] | Area [mAU*s] | Height [mAU] | Area %  |
|--------|---------------|------|-------------|--------------|--------------|---------|
| 1      | 27.280        | BB   | 0.6588      | 3230.39136   | 75.86506     | 50.0436 |
| 2      | 34.468        | BB   | 1.0076      | 3224.76050   | 46.46822     | 49.9564 |

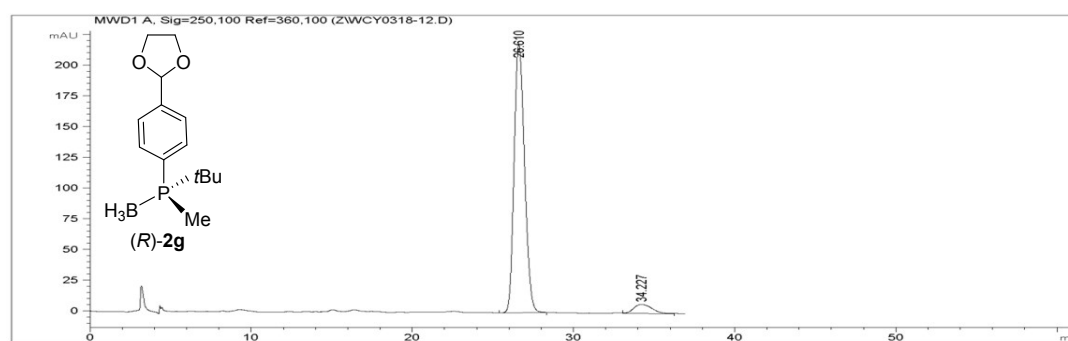

| Peak # | RetTime [min] | Type | Width [min] | Area [mAU*s] | Height [mAU] | Area %  |
|--------|---------------|------|-------------|--------------|--------------|---------|
| 1      | 26.610        | BB   | 0.6988      | 9841.18945   | 218.75577    | 94.5897 |
| 2      | 34.227        | BB   | 0.9137      | 562.89392    | 7.29899      | 5.4103  |

### Chiral HPLC chromatographic analysis of (R)-2h

Condition: Daicel Chiralcel OD-H, *n*-hexane/*i*-PrOH = 95/5, UV = 250 nm, flow rate: 0.8 mL/min, retention time: t (major) = 7.891 min, t (minor) = 8.692 min, ee = 79%.

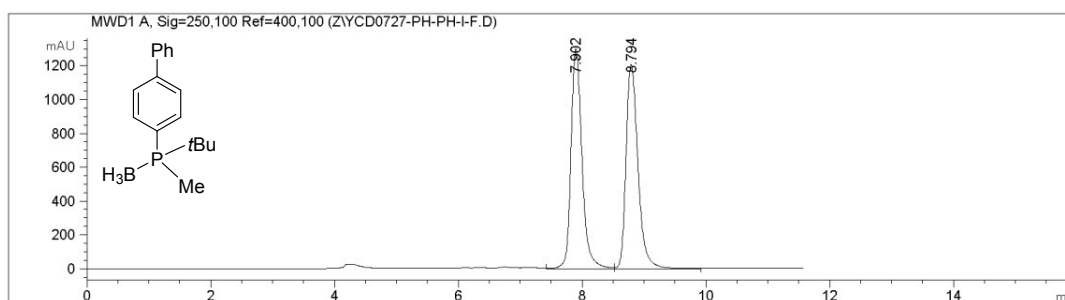

| Peak # | RetTime [min] | Type | Width [min] | Area [mAU*s] | Height [mAU] | Area %  |
|--------|---------------|------|-------------|--------------|--------------|---------|
| 1      | 7.902         | VV   | 0.1899      | 1.60491e4    | 1301.61743   | 49.7150 |
| 2      | 8.794         | VV   | 0.2087      | 1.62331e4    | 1208.62646   | 50.2850 |

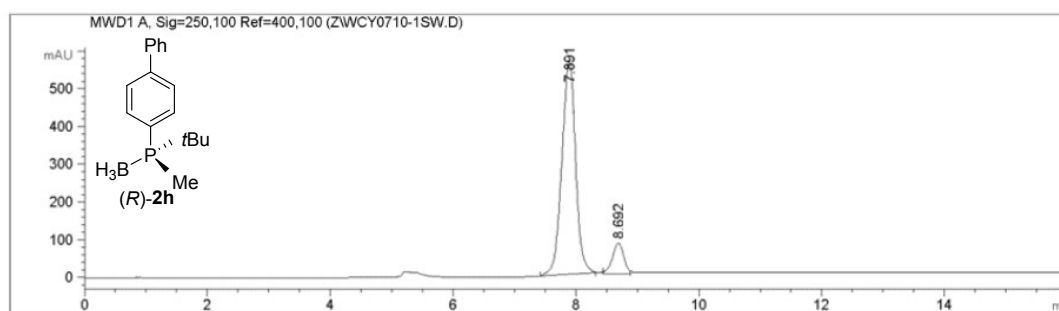

| Peak # | RetTime [min] | Type | Width [min] | Area [mAU*s] | Height [mAU] | Area %  |
|--------|---------------|------|-------------|--------------|--------------|---------|
| 1      | 7.891         | MM   | 0.2592      | 8811.94434   | 566.50598    | 89.0658 |
| 2      | 8.692         | MM   | 0.2172      | 1081.80591   | 83.02530     | 10.9342 |

### Chiral HPLC chromatographic analysis of (S)-2h

Condition: Daicel Chiralcel OD-H, *n*-hexane/*i*-PrOH = 95/5, UV = 250 nm, flow rate: 0.8 mL/min, retention time: t (minor) = 7.872 min, t (major) = 8.778 min, ee = 93%.

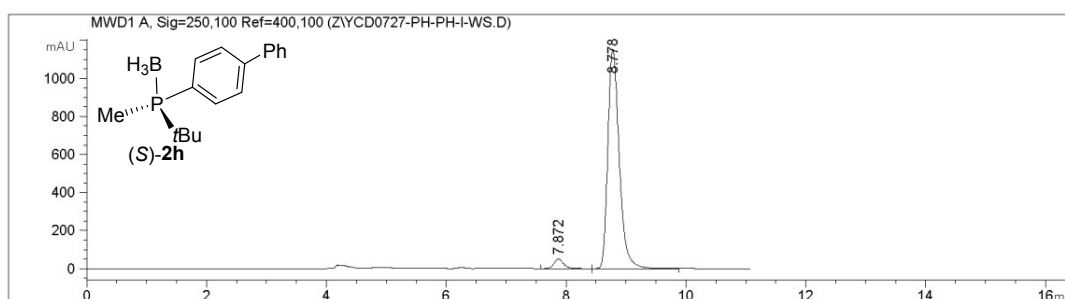

| Peak # | RetTime [min] | Type | Width [min] | Area [mAU*s] | Height [mAU] | Area %  |
|--------|---------------|------|-------------|--------------|--------------|---------|
| 1      | 7.872         | VV   | 0.1703      | 580.03973    | 51.13816     | 3.6508  |
| 2      | 8.778         | VB   | 0.2049      | 1.53080e4    | 1152.85278   | 96.3492 |

Chiral HPLC chromatographic analysis of (*R*)-**2i**

Condition: Daicel Chiralcel OD-H, *n*-hexane/*i*-PrOH = 90/10, UV = 254 nm, flow rate: 1.0 mL/min, retention time: t (major) = 9.399 min, t (minor) = 12.921 min, ee = 84%.

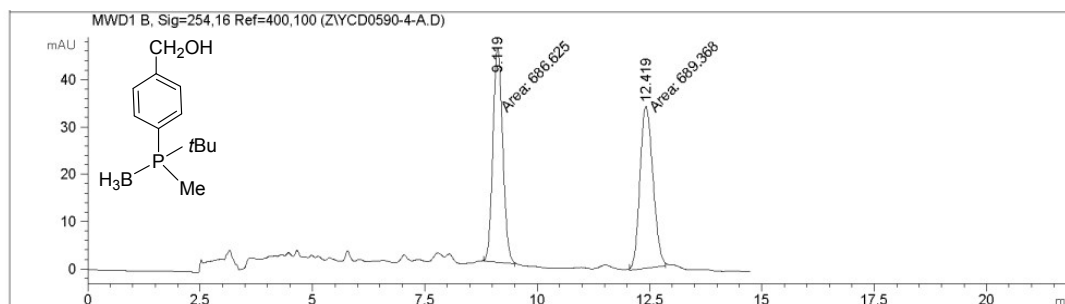

| Peak # | RetTime [min] | Type | Width [min] | Area [mAU*s] | Height [mAU] | Area %  |
|--------|---------------|------|-------------|--------------|--------------|---------|
| 1      | 9.119         | MM   | 0.2525      | 686.62518    | 45.32128     | 49.9003 |
| 2      | 12.419        | MM   | 0.3361      | 689.36816    | 34.18288     | 50.0997 |

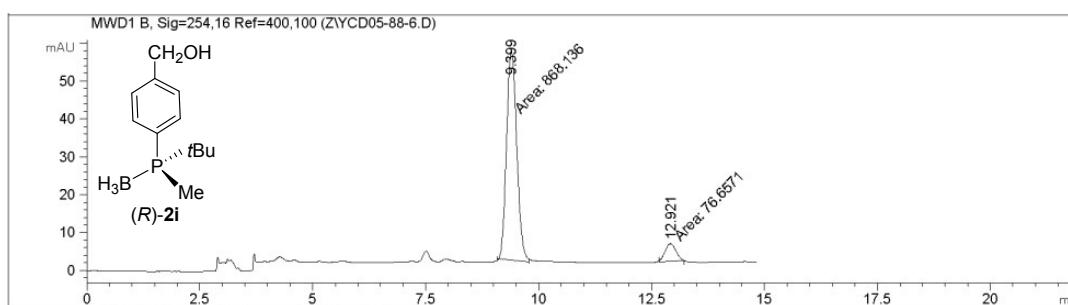

| Peak # | RetTime [min] | Type | Width [min] | Area [mAU*s] | Height [mAU] | Area %  |
|--------|---------------|------|-------------|--------------|--------------|---------|
| 1      | 9.399         | MM   | 0.2610      | 868.13562    | 55.44395     | 91.8864 |
| 2      | 12.921        | MM   | 0.2772      | 76.65712     | 4.60930      | 8.1136  |

### Chiral HPLC chromatographic analysis of (R)-2j

Condition: Daicel Chiralcel AS-H, *n*-hexane/*i*-PrOH = 99/1, UV = 234 nm, flow rate: 1.0 mL/min, retention time: t (minor) = 9.339 min, t (major) = 11.765 min, ee = 94%.

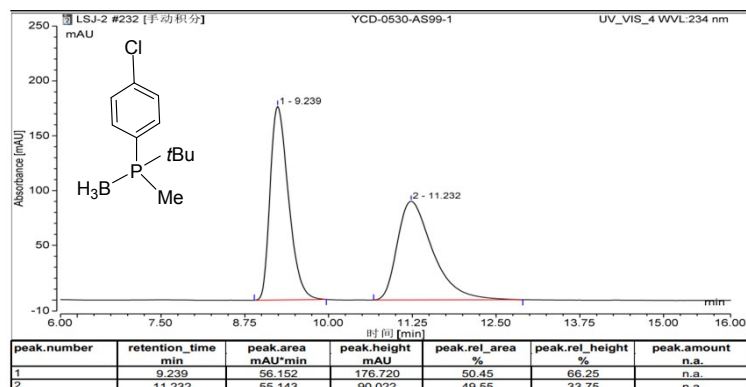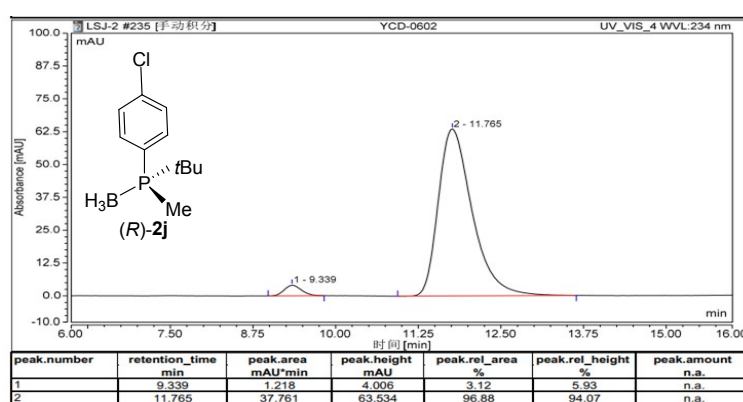

### Chiral HPLC chromatographic analysis of (S)-2j

Condition: Daicel Chiralcel AS-H, *n*-hexane/*i*-PrOH = 99/1, UV = 234 nm, flow rate: 1.0 mL/min, retention time: t (major) = 9.679 min, t (minor) = 12.252 min, ee = 95%.

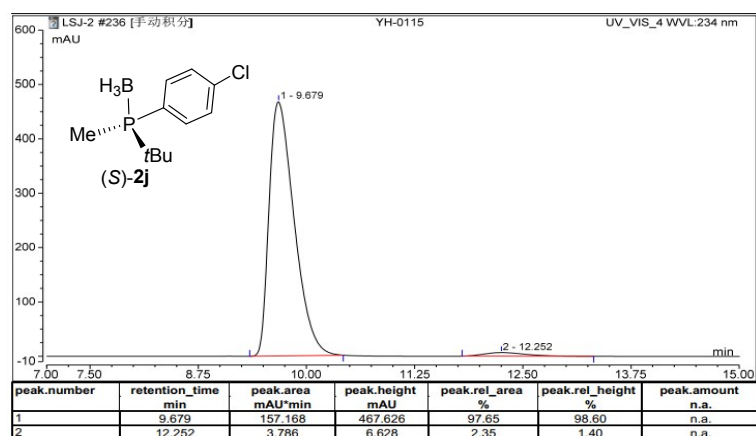

### Chiral HPLC chromatographic analysis of (R)-2k

Condition: Daicel Chiralcel AS-H, *n*-hexane/*i*-PrOH = 99/1, UV = 254 nm, flow rate: 1.0 mL/min, retention time: t (minor) = 6.392 min, t (major) = 6.672 min, ee = 89%.

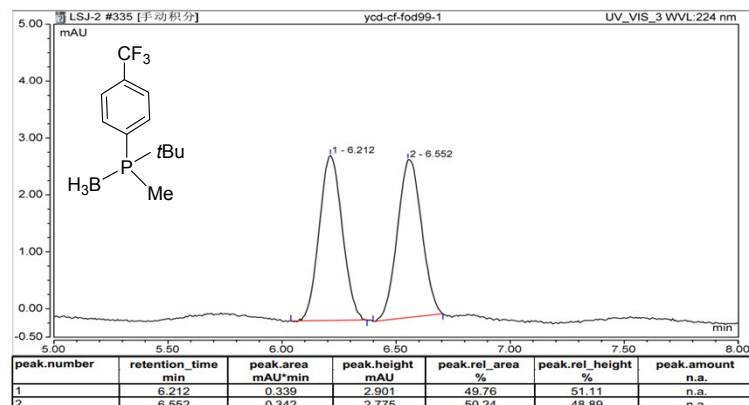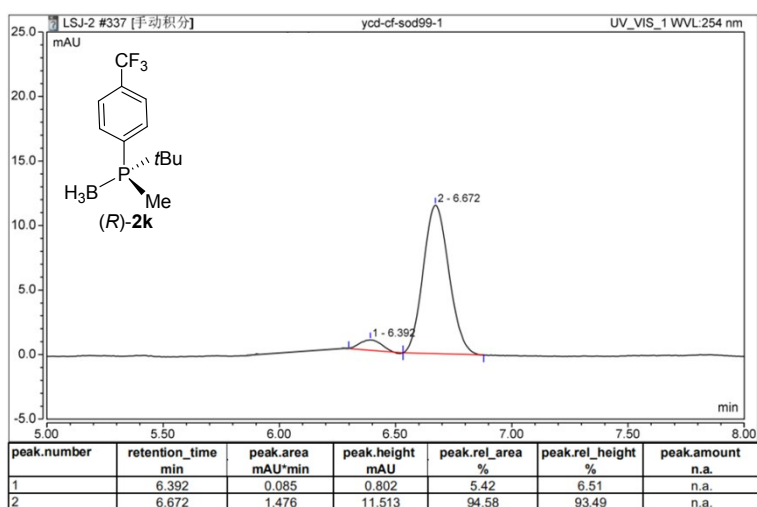

### Chiral HPLC chromatographic analysis of (S)-2k

Condition: Daicel Chiralcel AS-H, *n*-hexane/*i*-PrOH = 99/1, UV = 254 nm, flow rate: 1.0 mL/min, retention time: t (major) = 6.399 min, t (minor) = 6.745 min, ee = 94%.

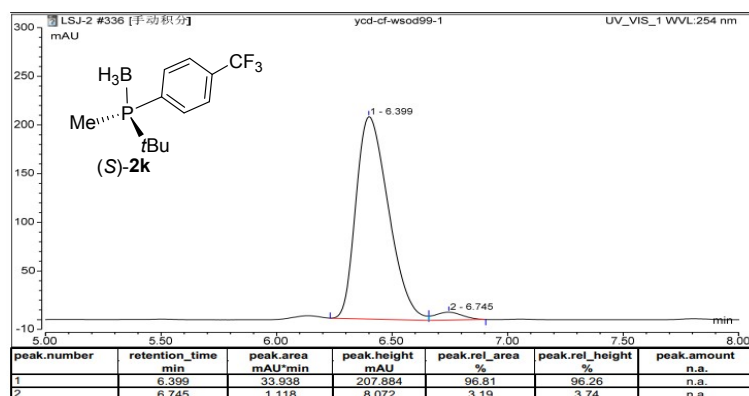

Chiral HPLC chromatographic analysis of (*R*)-**2I**

Condition: Daicel Chiralcel OD-H, *n*-hexane/*i*-PrOH = 90/10, UV = 254 nm, flow rate: 1.0 mL/min, retention time: t (major) = 7.292 min, t (minor) = 8.536 min, ee = 63%.

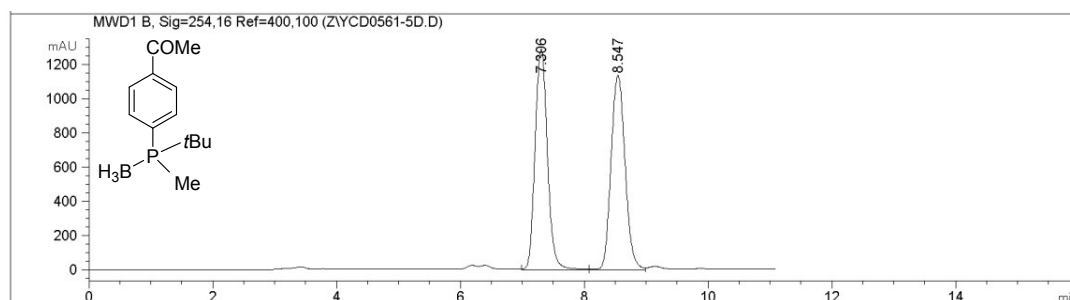

| Peak # | RetTime [min] | Type | Width [min] | Area [mAU*s] | Height [mAU] | Area %  |
|--------|---------------|------|-------------|--------------|--------------|---------|
| 1      | 7.306         | VV   | 0.2173      | 1.78369e4    | 1290.30762   | 50.0311 |
| 2      | 8.547         | VV   | 0.2489      | 1.78147e4    | 1136.46375   | 49.9689 |

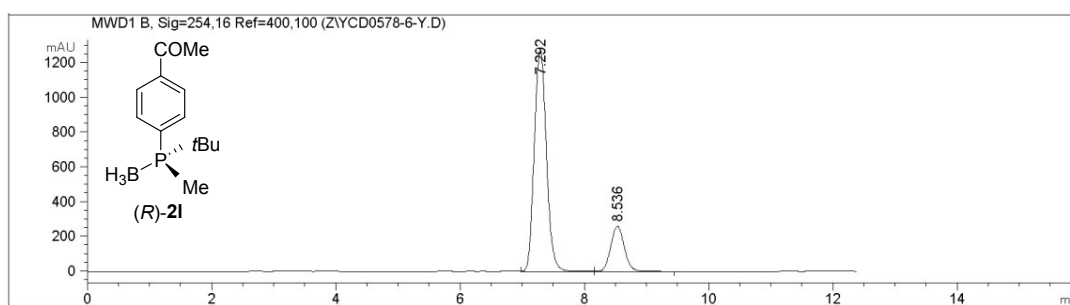

| Peak # | RetTime [min] | Type | Width [min] | Area [mAU*s] | Height [mAU] | Area %  |
|--------|---------------|------|-------------|--------------|--------------|---------|
| 1      | 7.292         | VV   | 0.2148      | 1.73500e4    | 1274.82043   | 81.5114 |
| 2      | 8.536         | VB   | 0.2391      | 3935.37378   | 259.18015    | 18.4886 |



Chiral HPLC chromatographic analysis of (*R*)-**2m**

Condition: Daicel Chiralcel OD-H, *n*-hexane/*i*-PrOH = 98/2, UV = 250 nm, flow rate = 1.0 mL/min, retention time: t (minor) = 54.504 min, t (major) = 57.362 min, ee = 65%.

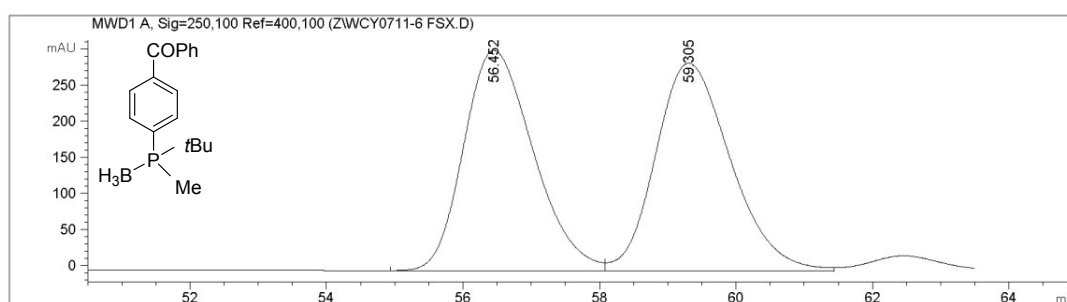

| Peak # | RetTime [min] | Type | Width [min] | Area [mAU*s] | Height [mAU] | Area %  |
|--------|---------------|------|-------------|--------------|--------------|---------|
| 1      | 56.452        | BV   | 1.0689      | 2.16603e4    | 305.59460    | 49.6648 |
| 2      | 59.305        | VB   | 1.1507      | 2.19528e4    | 288.19479    | 50.3352 |

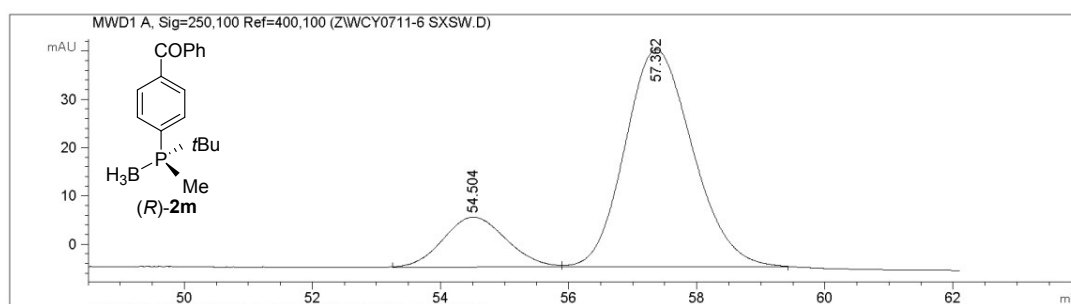

| Peak # | RetTime [min] | Type | Width [min] | Area [mAU*s] | Height [mAU] | Area %  |
|--------|---------------|------|-------------|--------------|--------------|---------|
| 1      | 54.504        | BV   | 0.8122      | 710.31201    | 10.35647     | 17.6685 |
| 2      | 57.362        | VB   | 1.0115      | 3309.91113   | 45.03048     | 82.3315 |

### Chiral HPLC chromatographic analysis of (R)-2n

Condition: Daicel Chiralcel OD-H, *n*-hexane/*i*-PrOH = 98/2, UV = 230 nm, flow rate: 0.8 mL/min, retention time: t (major) = 15.308 min, t (minor) = 16.976 min, ee = 92%.

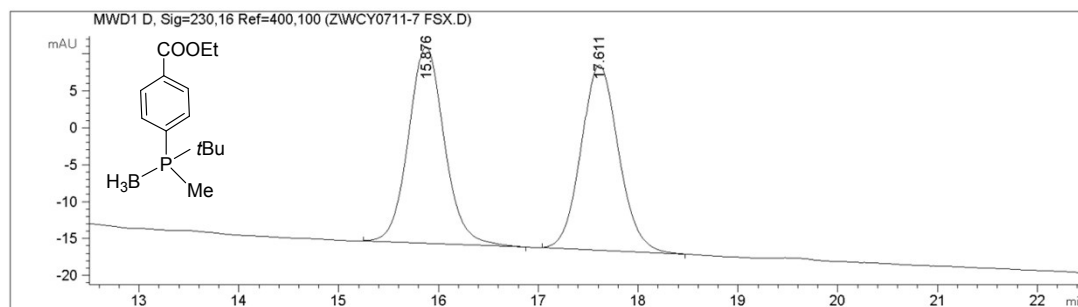

| Peak # | RetTime [min] | Type | Width [min] | Area [mAU*s] | Height [mAU] | Area %  |
|--------|---------------|------|-------------|--------------|--------------|---------|
| 1      | 15.876        | BB   | 0.3852      | 664.83820    | 26.63724     | 50.2941 |
| 2      | 17.611        | BB   | 0.4033      | 657.06366    | 25.10902     | 49.7059 |

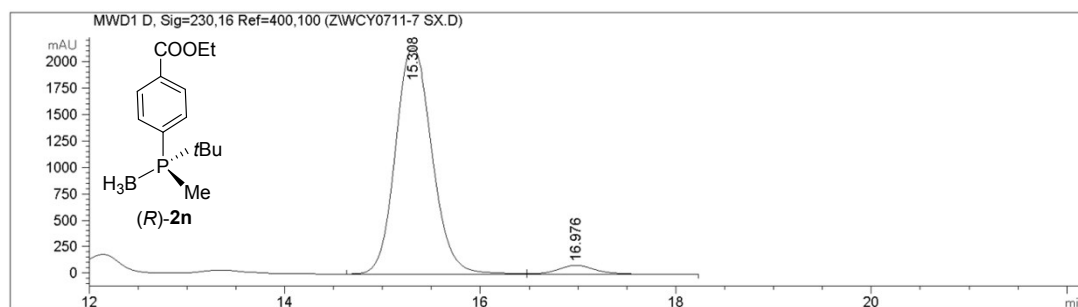

| Peak # | RetTime [min] | Type | Width [min] | Area [mAU*s] | Height [mAU] | Area %  |
|--------|---------------|------|-------------|--------------|--------------|---------|
| 1      | 15.308        | BV   | 0.4053      | 5.55358e4    | 2136.49756   | 95.9750 |
| 2      | 16.976        | VBA  | 0.4180      | 2329.07520   | 84.37858     | 4.0250  |

### Chiral HPLC chromatographic analysis of (S)-2n

Condition: Daicel Chiralcel OD-H, *n*-hexane/*i*-PrOH = 98/2, UV = 230 nm, flow rate: 0.8 mL/min, retention time: t (minor) = 14.957 min, t (major) = 16.501 min, ee = 97%.

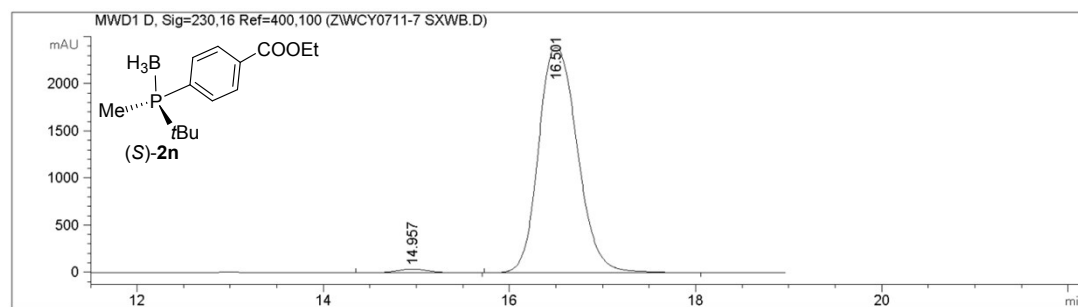

| Peak # | RetTime [min] | Type | Width [min] | Area [mAU*s] | Height [mAU] | Area %  |
|--------|---------------|------|-------------|--------------|--------------|---------|
| 1      | 14.957        | BB   | 0.3703      | 964.50848    | 40.14457     | 1.3745  |
| 2      | 16.501        | BB   | 0.4558      | 6.92074e4    | 2390.02808   | 98.6255 |

Chiral HPLC chromatographic analysis of (*R*)-**2o**

Condition: Daicel Chiralcel OD-H, *n*-hexane/*i*-PrOH = 90/10, UV = 250 nm, flow rate: 1.0 mL/min, retention time: t (major) = 7.383 min, t (minor) = 8.712 min, ee = 74%.

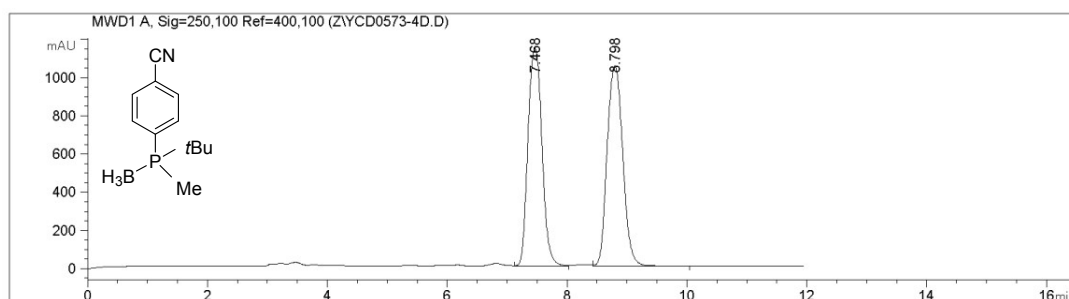

| Peak # | RetTime [min] | Type | Width [min] | Area [mAU*s] | Height [mAU] | Area %  |
|--------|---------------|------|-------------|--------------|--------------|---------|
| 1      | 7.468         | VV   | 0.2641      | 1.85677e4    | 1139.59644   | 49.4247 |
| 2      | 8.798         | VB   | 0.2932      | 1.89999e4    | 1049.40784   | 50.5753 |

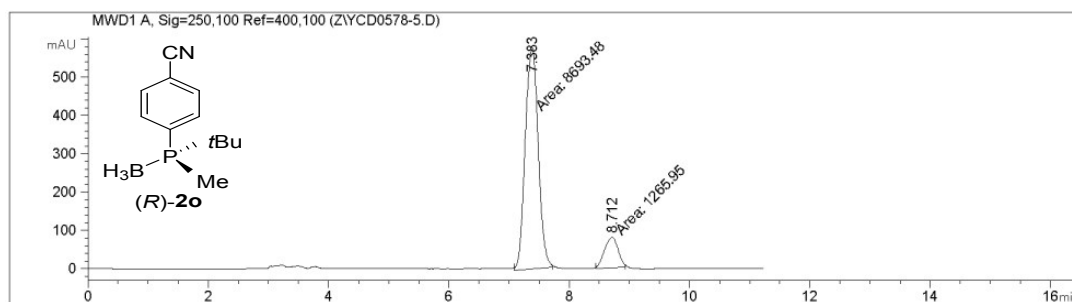

| Peak # | RetTime [min] | Type | Width [min] | Area [mAU*s] | Height [mAU] | Area %  |
|--------|---------------|------|-------------|--------------|--------------|---------|
| 1      | 7.383         | MM   | 0.2504      | 8693.47656   | 578.62793    | 87.2889 |
| 2      | 8.712         | MM   | 0.2651      | 1265.95020   | 79.58189     | 12.7111 |

Chiral HPLC chromatographic analysis of (*R*)-**2p**

Condition: Daicel Chiralcel OD-H, *n*-hexane/*i*-PrOH = 98/2, UV = 250 nm, flow rate: 1 mL/min, retention time: t (minor) = 7.585 min, t (major) = 12.549 min, ee = 46%.

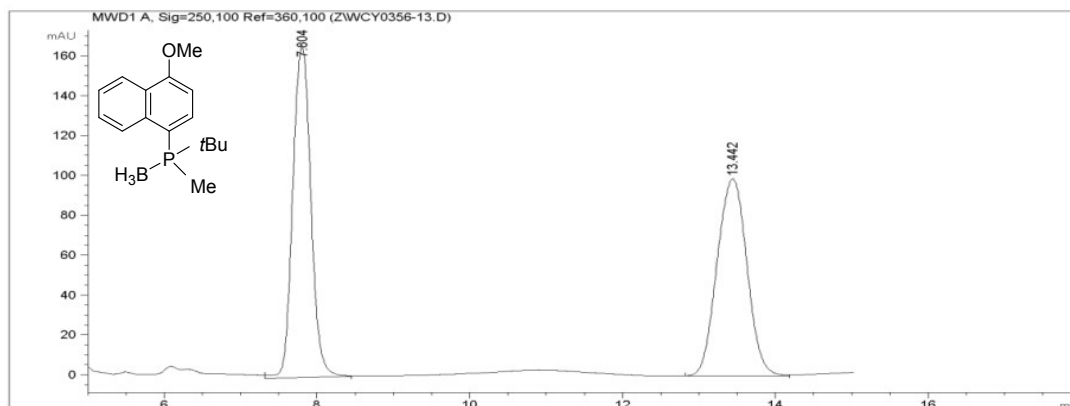

| Peak # | RetTime [min] | Type | Width [min] | Area [mAU*s] | Height [mAU] | Area %  |
|--------|---------------|------|-------------|--------------|--------------|---------|
| 1      | 7.804         | VB   | 0.2622      | 2737.16406   | 166.10471    | 50.4405 |
| 2      | 13.442        | BV   | 0.4397      | 2689.35889   | 98.75276     | 49.5595 |

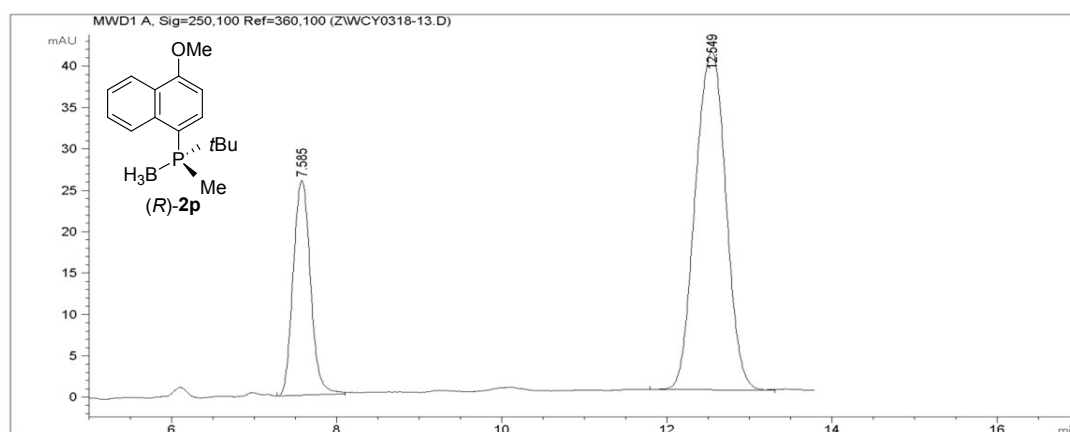

| Peak # | RetTime [min] | Type | Width [min] | Area [mAU*s] | Height [mAU] | Area %  |
|--------|---------------|------|-------------|--------------|--------------|---------|
| 1      | 7.585         | MM   | 0.2464      | 388.42853    | 26.27163     | 26.8371 |
| 2      | 12.549        | MM   | 0.4311      | 1058.92957   | 40.94217     | 73.1629 |

Chiral HPLC chromatographic analysis of (*R*)-**2q**

Condition: Daicel Chiralcel IBN-H, *n*-hexane/*i*-PrOH = 99/1, UV = 254 nm, flow rate: 0.5 mL/min, retention time: *t* (minor) = 11.612 min, *t* (major) = 12.325 min, ee = 74%.

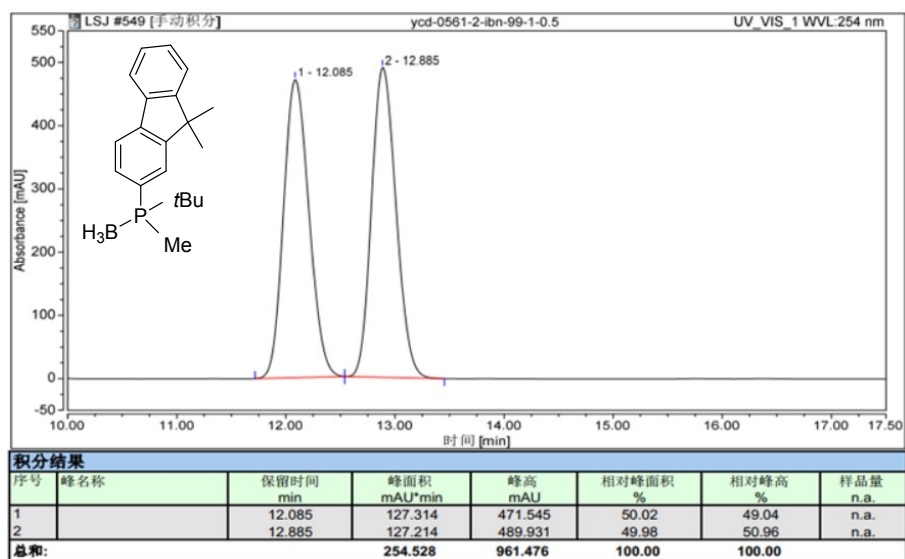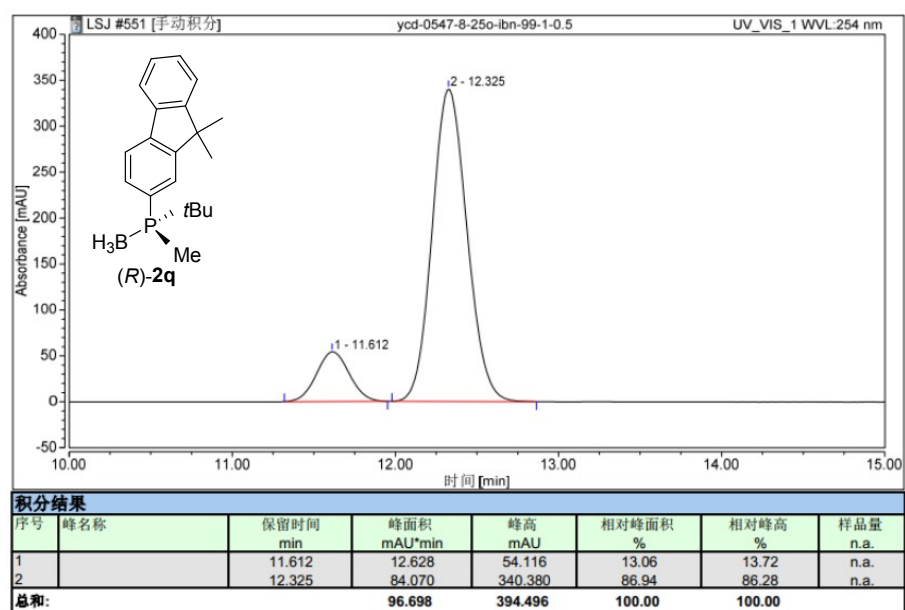

Chiral HPLC chromatographic analysis of (*R*)-**2r**

Condition: Daicel Chiralcel AS-H, *n*-hexane/*i*-PrOH = 90/10, UV = 254 nm, flow rate: 1.0 mL/min, retention time: *t* (minor) = 13.414 min, *t* (major) = 28.472 min, ee = 91%.

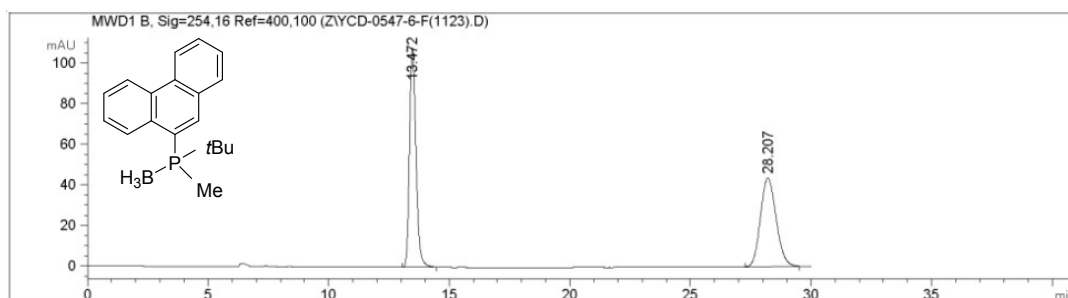

| Peak # | RetTime [min] | Type | Width [min] | Area [mAU*s] | Height [mAU] | Area %  |
|--------|---------------|------|-------------|--------------|--------------|---------|
| 1      | 13.472        | BB   | 0.2857      | 2014.30762   | 107.95863    | 50.4901 |
| 2      | 28.207        | BB   | 0.7027      | 1975.20361   | 43.75396     | 49.5099 |

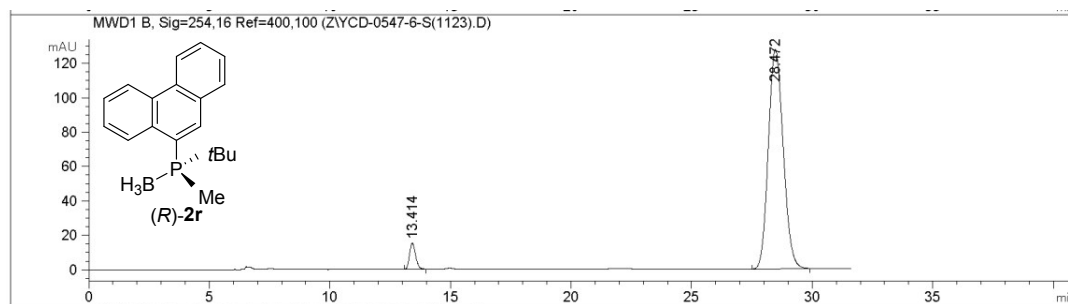

| Peak # | RetTime [min] | Type | Width [min] | Area [mAU*s] | Height [mAU] | Area %  |
|--------|---------------|------|-------------|--------------|--------------|---------|
| 1      | 13.414        | BB   | 0.2684      | 264.03180    | 15.21731     | 4.5899  |
| 2      | 28.472        | BB   | 0.6664      | 5488.38379   | 127.44125    | 95.4101 |

Chiral HPLC chromatographic analysis of (*R*)-**3a**

Condition: Daicel Chiralcel OD-H, *n*-hexane/*i*-PrOH = 98/2, UV = 250 nm, flow rate: 0.8 mL/min, retention time: t (minor) = 8.667 min, t (major) = 10.155 min, ee = 80%.

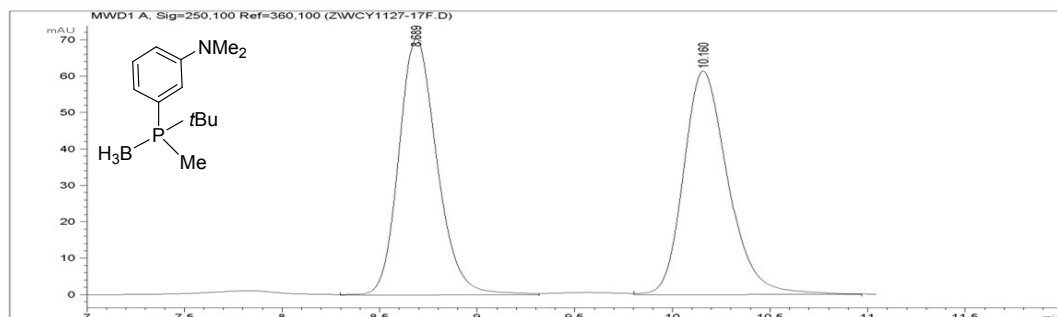

| Peak # | RetTime [min] | Type | Width [min] | Area [mAU*s] | Height [mAU] | Area %  |
|--------|---------------|------|-------------|--------------|--------------|---------|
| 1      | 8.689         | VB   | 0.2075      | 951.84967    | 70.50359     | 49.4794 |
| 2      | 10.160        | VB   | 0.2447      | 971.87811    | 61.37379     | 50.5206 |

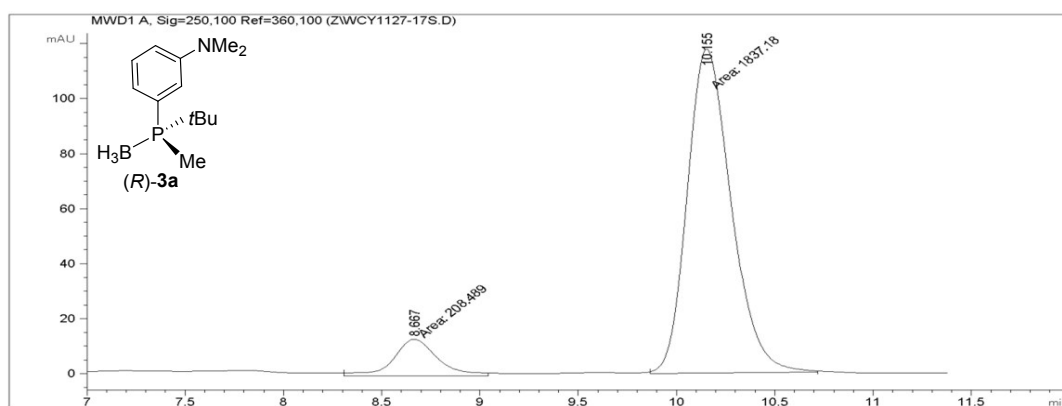

| Peak # | RetTime [min] | Type | Width [min] | Area [mAU*s] | Height [mAU] | Area %  |
|--------|---------------|------|-------------|--------------|--------------|---------|
| 1      | 8.667         | MM   | 0.2614      | 208.48915    | 13.29100     | 10.1917 |
| 2      | 10.155        | MM   | 0.2600      | 1837.17725   | 117.78152    | 89.8083 |

### Chiral HPLC chromatographic analysis of (*R*)-**3b**

Condition: Daicel Chiralcel OD-H, *n*-hexane/*i*-PrOH = 90/10, UV = 250 nm, flow rate: 1.0 mL/min, retention time: t (major) = 11.953 min, t (minor) = 16.618 min, ee = 46%.

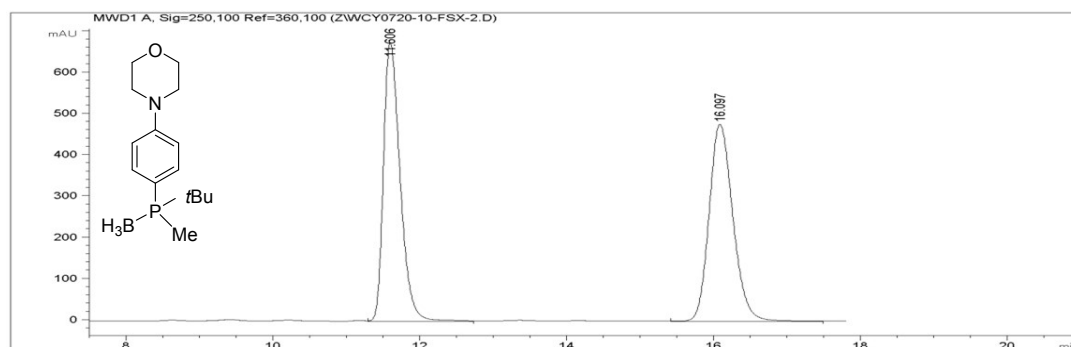

| Peak # | RetTime [min] | Type | Width [min] | Area [mAU*s] | Height [mAU] | Area %  |
|--------|---------------|------|-------------|--------------|--------------|---------|
| 1      | 11.606        | VV   | 0.2441      | 1.06681e4    | 675.93866    | 49.7857 |
| 2      | 16.097        | VV   | 0.3490      | 1.07599e4    | 477.22977    | 50.2143 |

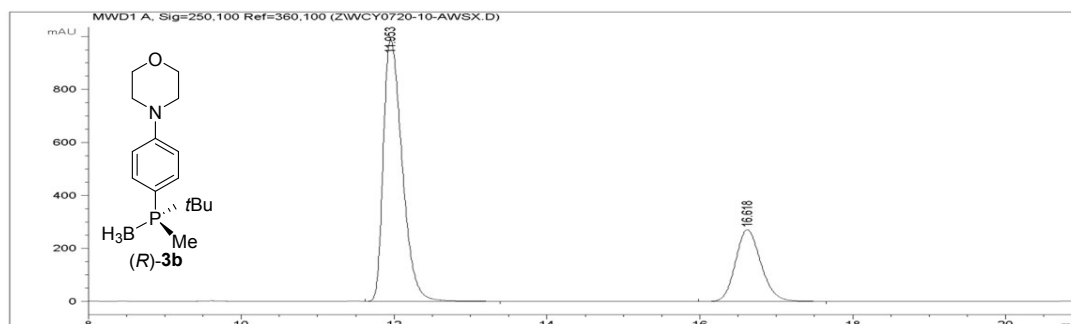

| Peak # | RetTime [min] | Type | Width [min] | Area [mAU*s] | Height [mAU] | Area %  |
|--------|---------------|------|-------------|--------------|--------------|---------|
| 1      | 11.953        | VB   | 0.2657      | 1.68999e4    | 987.07568    | 73.0724 |
| 2      | 16.618        | VB   | 0.3566      | 6227.70654   | 270.53220    | 26.9276 |

### Chiral HPLC chromatographic analysis of (*S*)-**3b**

Condition: Daicel Chiralcel OD-H, *n*-hexane/*i*-PrOH = 90/10, UV = 250 nm, flow rate: 1.0 mL/min, retention time: t (minor) = 11.772 min, t (major) = 16.287 min, ee = 91%.

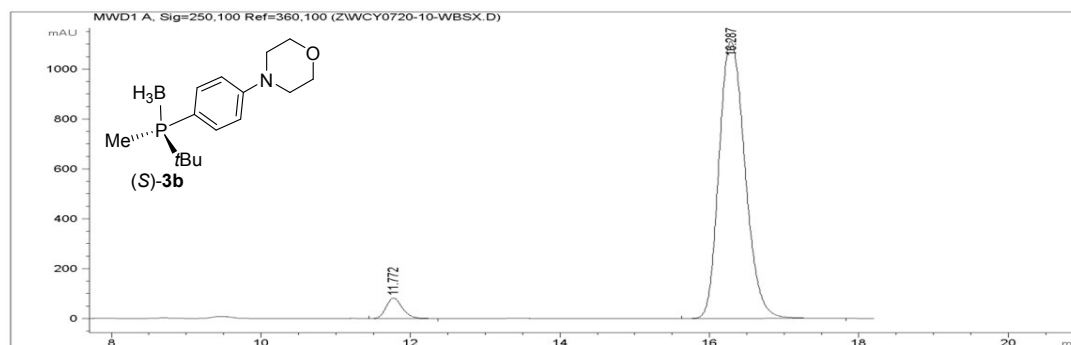

| Peak # | RetTime [min] | Type | Width [min] | Area [mAU*s] | Height [mAU] | Area %  |
|--------|---------------|------|-------------|--------------|--------------|---------|
| 1      | 11.772        | VB   | 0.2353      | 1256.51868   | 82.66304     | 4.4697  |
| 2      | 16.287        | VB   | 0.3820      | 2.68556e4    | 1110.85352   | 95.5303 |



Chiral HPLC chromatographic analysis of (*R*)-**3c**

Condition: Daicel Chiralcel OD-H, *n*-hexane/*i*-PrOH = 98/2, UV = 254 nm, flow rate: 0.8 mL/min, retention time: t (major) = 13.659 min, t (minor) = 15.300 min, ee = 94%.

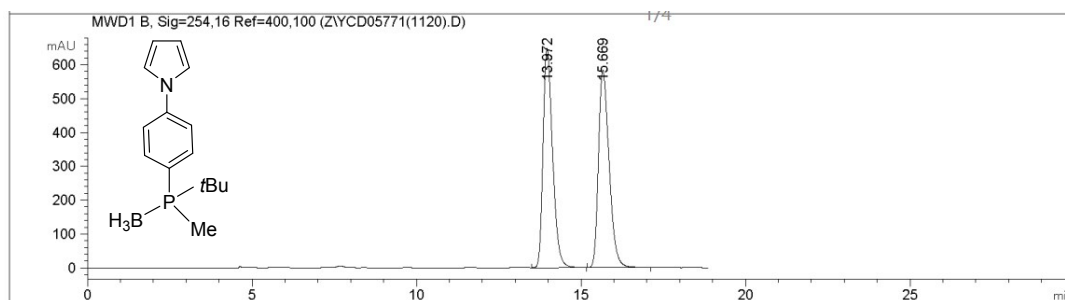

| Peak # | RetTime [min] | Type | Width [min] | Area [mAU*s] | Height [mAU] | Area %  |
|--------|---------------|------|-------------|--------------|--------------|---------|
| 1      | 13.972        | VB   | 0.3092      | 1.30541e4    | 647.54486    | 49.8619 |
| 2      | 15.669        | BB   | 0.3465      | 1.31264e4    | 583.34375    | 50.1381 |

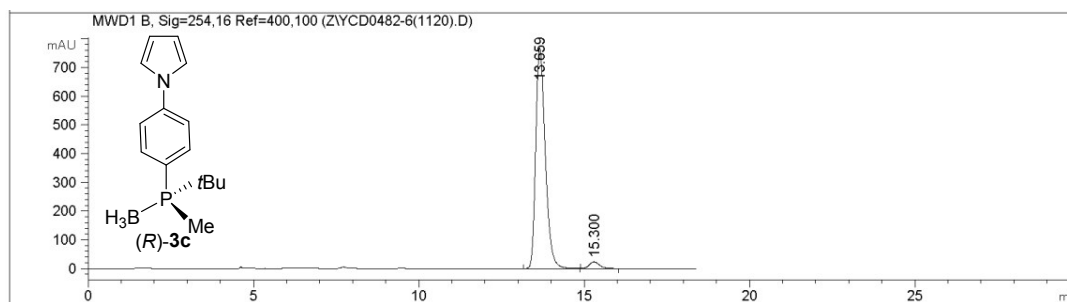

| Peak # | RetTime [min] | Type | Width [min] | Area [mAU*s] | Height [mAU] | Area %  |
|--------|---------------|------|-------------|--------------|--------------|---------|
| 1      | 13.659        | BB   | 0.3100      | 1.55394e4    | 768.12622    | 96.8499 |
| 2      | 15.300        | BB   | 0.3310      | 505.42291    | 23.30959     | 3.1501  |

### Chiral HPLC chromatographic analysis of (*R*)-**3d**

Condition: Daicel Chiralcel AS-H, *n*-hexane/*i*-PrOH = 98/2, UV = 254 nm, flow rate: 0.5 mL/min, retention time: *t* (major) = 18.239 min, *t* (minor) = 20.275 min, ee = 69%.

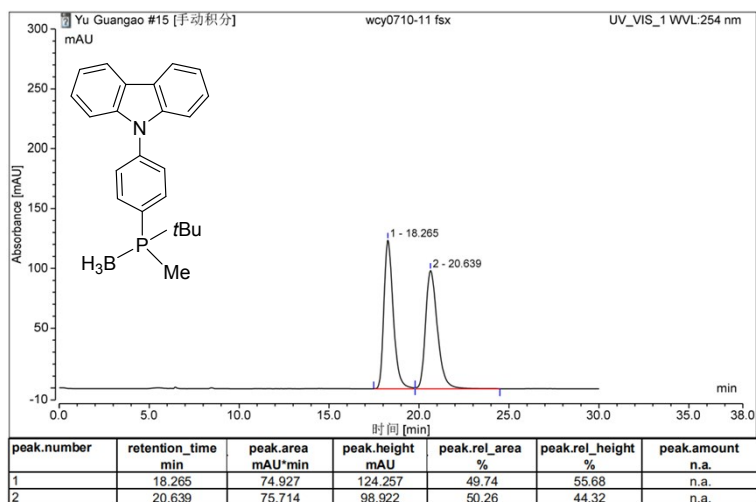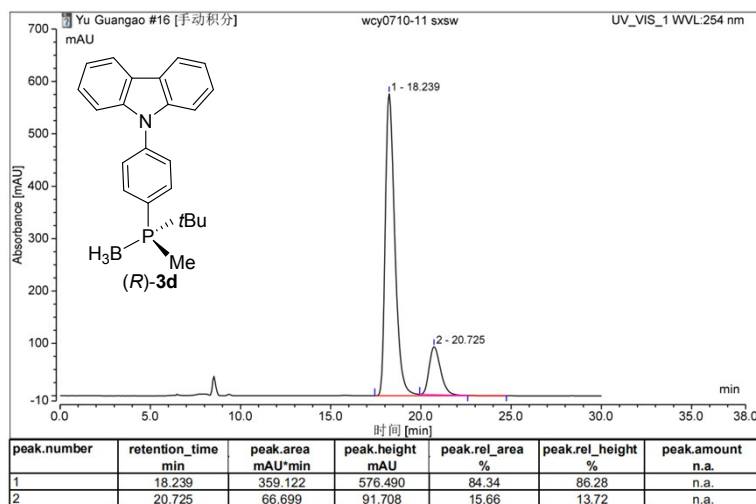

### Chiral HPLC chromatographic analysis of (*S*)-**3d**

Condition: Daicel Chiralcel AS-H, *n*-hexane/*i*-PrOH = 98/2, UV = 254 nm, flow rate: 0.5 mL/min, retention time: *t* (minor) = 18.379 min, *t* (major) = 20.599 min, ee = 90%.

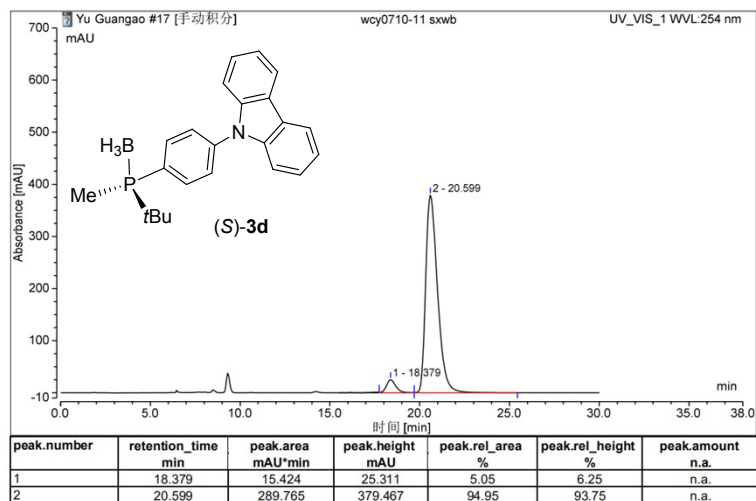

Chiral HPLC chromatographic analysis of (*R*)-**3e**

Condition: Daicel Chiralcel OD-H, *n*-hexane/*i*-PrOH = 98/2, UV = 250 nm, flow rate: 1.0 mL/min, retention time: t (minor) = 5.476 min, t (major) = 5.912 min, ee = 84%.

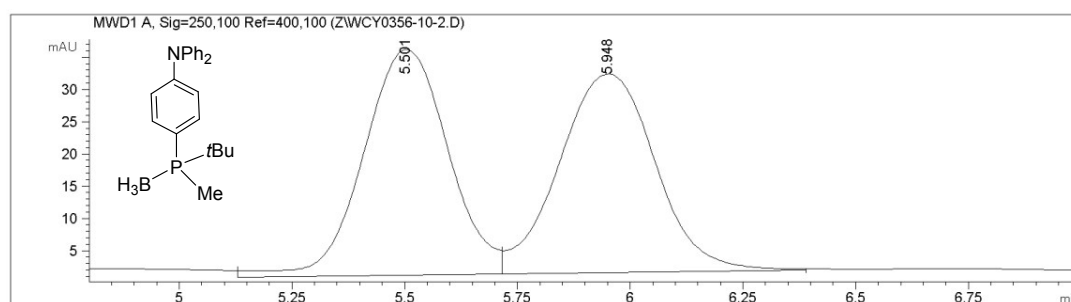

| Peak # | RetTime [min] | Type | Width [min] | Area [mAU*s] | Height [mAU] | Area %  |
|--------|---------------|------|-------------|--------------|--------------|---------|
| 1      | 5.501         | VV   | 0.2049      | 459.19754    | 35.03112     | 50.1799 |
| 2      | 5.948         | VB   | 0.2327      | 455.90411    | 30.79701     | 49.8201 |

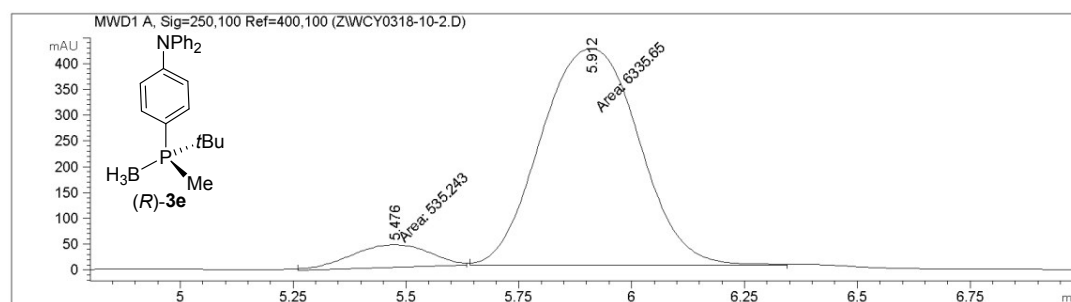

| Peak # | RetTime [min] | Type | Width [min] | Area [mAU*s] | Height [mAU] | Area %  |
|--------|---------------|------|-------------|--------------|--------------|---------|
| 1      | 5.476         | MM   | 0.2041      | 535.24298    | 43.70932     | 7.7900  |
| 2      | 5.912         | MM   | 0.2519      | 6335.65332   | 419.17145    | 92.2100 |

### Chiral HPLC chromatographic analysis of (R)-3f

Condition: Daicel Chiralcel OD-H, *n*-hexane/*i*-PrOH = 90/10, UV = 254 nm, flow rate: 1.0 mL/min, retention time: t (major) = 9.428 min, t (minor) = 11.065 min, ee = 94%.

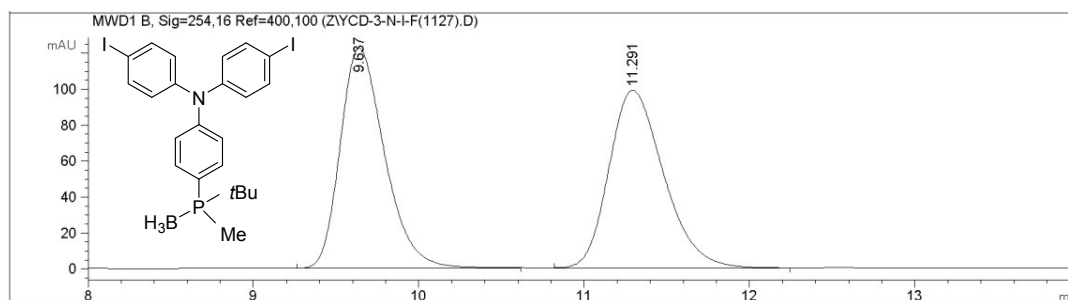

| Peak # | RetTime [min] | Type | Width [min] | Area [mAU*s] | Height [mAU] | Area %  |
|--------|---------------|------|-------------|--------------|--------------|---------|
| 1      | 9.637         | BB   | 0.2880      | 2291.81104   | 122.62823    | 50.1904 |
| 2      | 11.291        | BB   | 0.3562      | 2274.42212   | 98.93695     | 49.8096 |

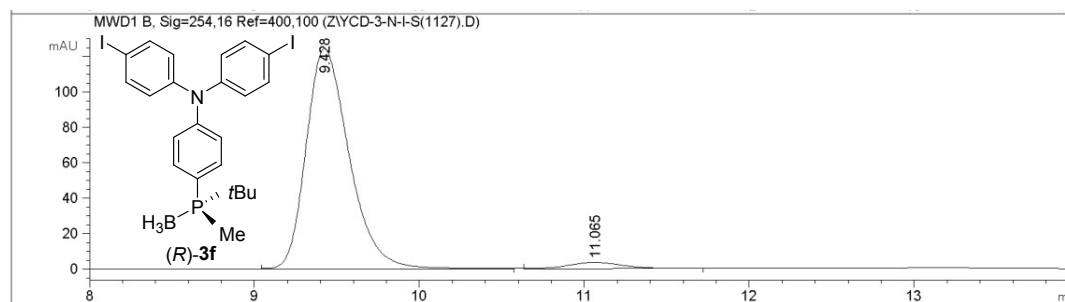

| Peak # | RetTime [min] | Type | Width [min] | Area [mAU*s] | Height [mAU] | Area %  |
|--------|---------------|------|-------------|--------------|--------------|---------|
| 1      | 9.428         | BB   | 0.2757      | 2232.09448   | 124.19257    | 96.7876 |
| 2      | 11.065        | BB   | 0.3213      | 74.08373     | 3.41209      | 3.2124  |

### Chiral HPLC chromatographic analysis of (S)-3f

Condition: Daicel Chiralcel OD-H, *n*-hexane/*i*-PrOH = 90/10, UV = 254 nm, flow rate: 1.0 mL/min, retention time: t (minor) = 9.797 min, t (major) = 11.418 min, ee = 95%.

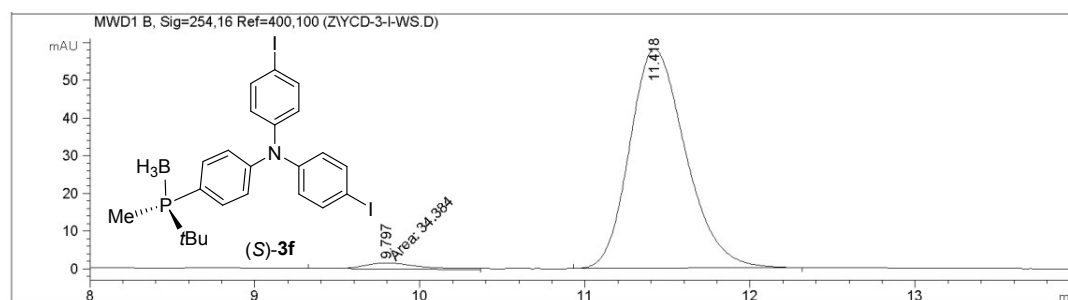

| Peak # | RetTime [min] | Type | Width [min] | Area [mAU*s] | Height [mAU] | Area %  |
|--------|---------------|------|-------------|--------------|--------------|---------|
| 1      | 9.797         | MM   | 0.3612      | 34.38400     | 1.58657      | 2.4392  |
| 2      | 11.418        | BB   | 0.3653      | 1375.23950   | 58.27720     | 97.5608 |

Chiral HPLC chromatographic analysis of (R)-**3g**

Condition: Daicel Chiralcel AS-H, *n*-hexane/*i*-PrOH = 98/2, UV = 250 nm, flow rate: 1.0 mL/min, retention time: t (minor) = 11.503 min, t (major) = 12.124 min, ee = 97%.

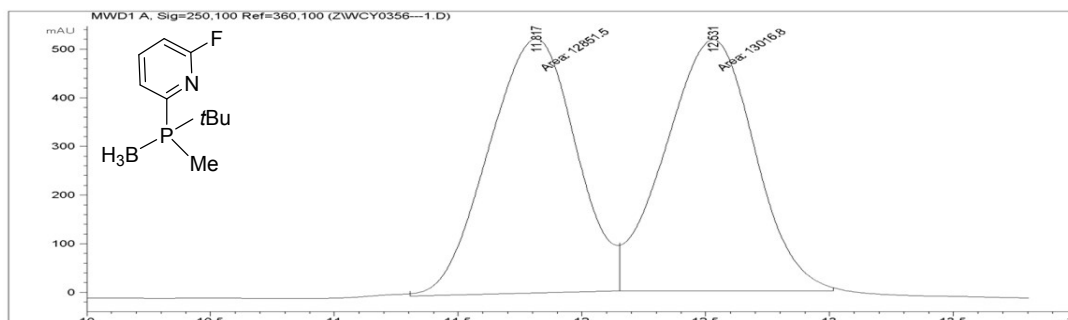

| Peak # | RetTime [min] | Type | Width [min] | Area [mAU*s] | Height [mAU] | Area %  |
|--------|---------------|------|-------------|--------------|--------------|---------|
| 1      | 11.817        | MM   | 0.4101      | 1.28515e4    | 522.30109    | 49.6805 |
| 2      | 12.531        | MM   | 0.4201      | 1.30168e4    | 516.47839    | 50.3195 |

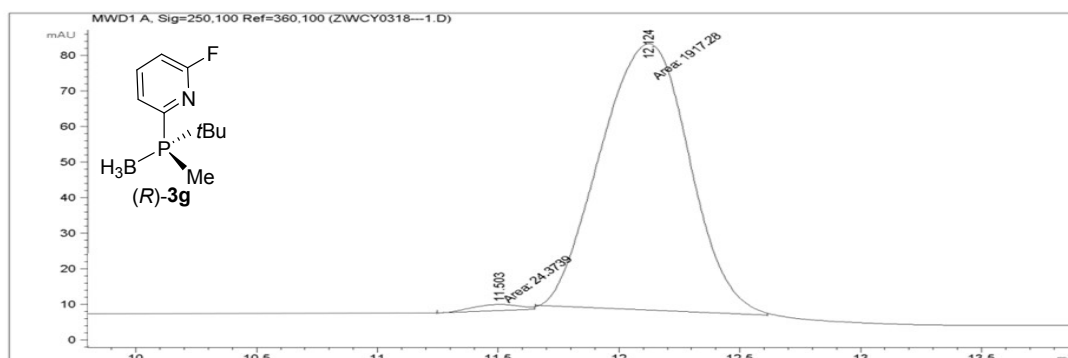

| Peak # | RetTime [min] | Type | Width [min] | Area [mAU*s] | Height [mAU] | Area %  |
|--------|---------------|------|-------------|--------------|--------------|---------|
| 1      | 11.503        | MM   | 0.2345      | 24.37392     | 1.73228      | 1.2553  |
| 2      | 12.124        | MM   | 0.4272      | 1917.28198   | 74.80308     | 98.7447 |

Chiral HPLC chromatographic analysis of (S)-**3g**

Condition: Daicel Chiralcel AS-H, *n*-hexane/*i*-PrOH = 98/2, UV = 250 nm, flow rate: 1.0 mL/min, retention time: t (major) = 11.471 min, t (minor) = 12.718 min, ee = 93%.

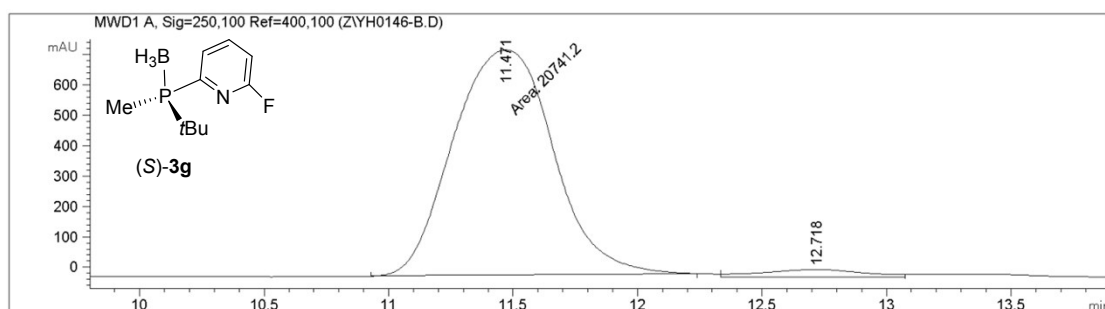

| Peak # | RetTime [min] | Type | Width [min] | Area [mAU*s] | Height [mAU] | Area %  |
|--------|---------------|------|-------------|--------------|--------------|---------|
| 1      | 11.471        | MM   | 0.4666      | 2.07412e4    | 740.90192    | 96.7001 |
| 2      | 12.718        | VV   | 0.4179      | 707.80133    | 24.73396     | 3.2999  |

Chiral HPLC chromatographic analysis of (*R*)-**3h**

Condition: Daicel Chiralcel AS-H, *n*-hexane/*i*-PrOH = 95/5, UV = 230 nm, flow rate: 1.0 mL/min, retention time: t (minor) = 8.140 min, t (major) = 9.308 min, ee = 73%.

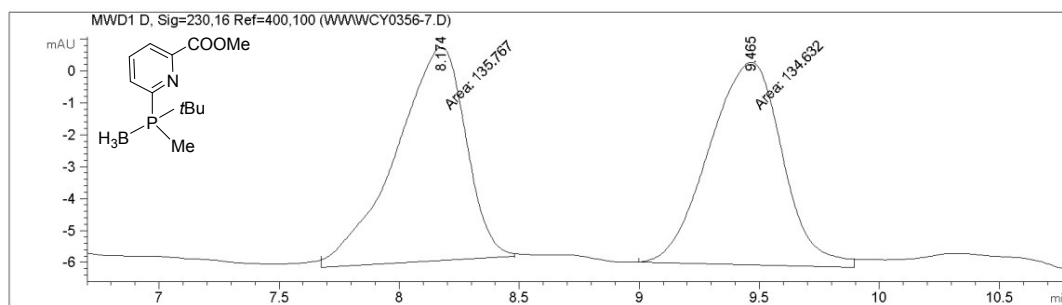

| Peak # | RetTime [min] | Type | Width [min] | Area [mAU*s] | Height [mAU] | Area %  |
|--------|---------------|------|-------------|--------------|--------------|---------|
| 1      | 8.174         | MM   | 0.3382      | 135.76715    | 6.69110      | 50.2099 |
| 2      | 9.465         | MM   | 0.3538      | 134.63216    | 6.34185      | 49.7901 |

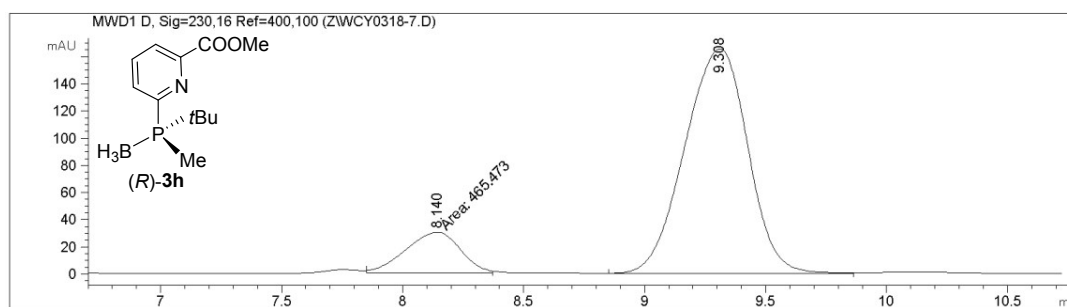

| Peak # | RetTime [min] | Type | Width [min] | Area [mAU*s] | Height [mAU] | Area %  |
|--------|---------------|------|-------------|--------------|--------------|---------|
| 1      | 8.140         | MM   | 0.2612      | 465.47260    | 29.70196     | 13.4696 |
| 2      | 9.308         | BB   | 0.2891      | 2990.25122   | 165.27945    | 86.5304 |

Chiral HPLC chromatographic analysis of (*R*)-**3i**

Condition: Daicel Chiralcel AS-H, *n*-hexane/*i*-PrOH = 98/2, UV = 250 nm, flow rate: 0.8 mL/min, retention time: t (minor) = 6.452 min, t (major) = 6.937 min, ee = 81%.

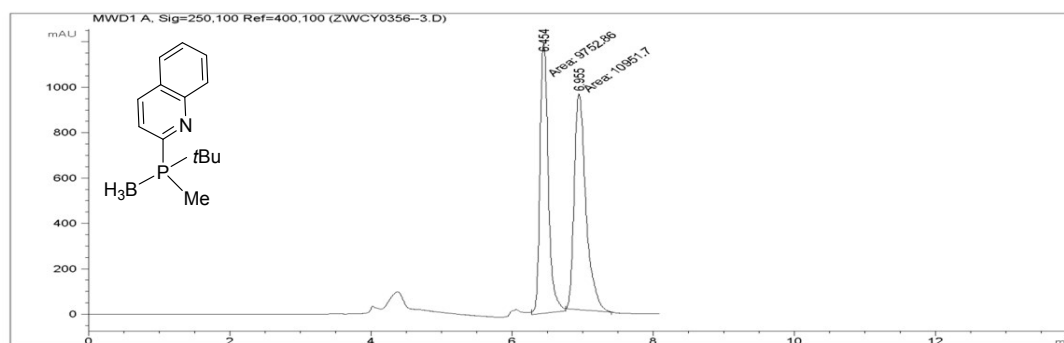

| Peak # | RetTime [min] | Type | Width [min] | Area [mAU*s] | Height [mAU] | Area %  |
|--------|---------------|------|-------------|--------------|--------------|---------|
| 1      | 6.454         | MM   | 0.1390      | 1.00071e4    | 1199.93201   | 49.5254 |
| 2      | 6.955         | MM   | 0.1839      | 1.01989e4    | 924.26465    | 50.4746 |

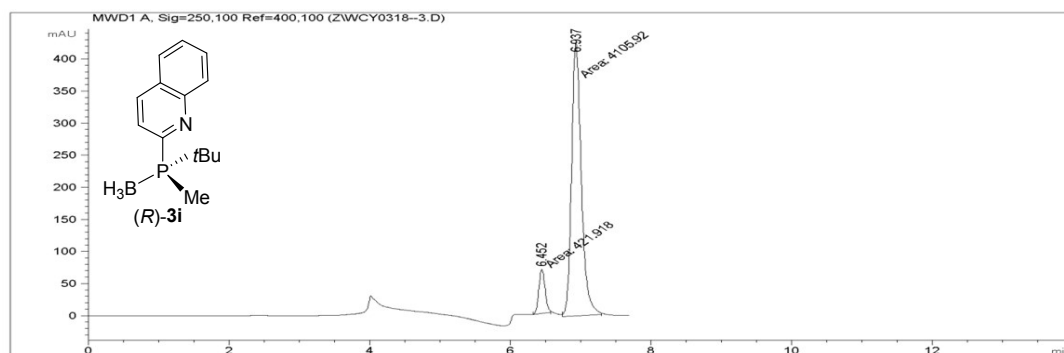

| Peak # | RetTime [min] | Type | Width [min] | Area [mAU*s] | Height [mAU] | Area %  |
|--------|---------------|------|-------------|--------------|--------------|---------|
| 1      | 6.452         | MM   | 0.1016      | 421.91812    | 69.22715     | 9.3183  |
| 2      | 6.937         | MM   | 0.1604      | 4105.91650   | 426.71967    | 90.6817 |

### Chiral HPLC chromatographic analysis of (*R*)-**3j**

Condition: Daicel Chiralcel OD-H, *n*-hexane/*i*-PrOH = 98/2, UV = 250 nm, flow rate: 1.0 mL/min, retention time: t (minor) = 6.324 min, t (major) = 7.473 min, ee = 71%.

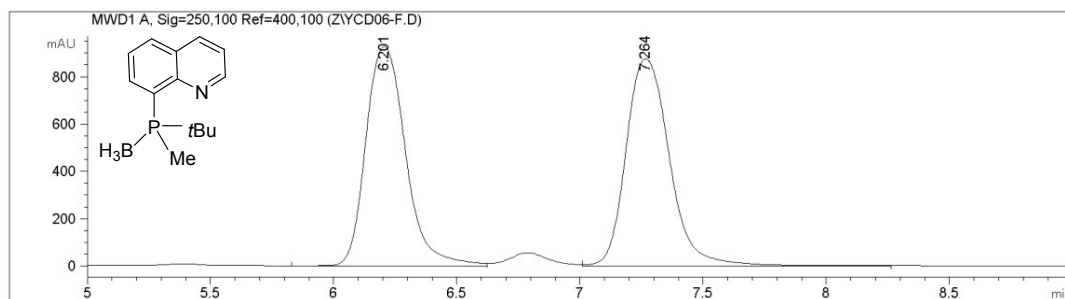

| Peak # | RetTime [min] | Type | Width [min] | Area [mAU*s] | Height [mAU] | Area %  |
|--------|---------------|------|-------------|--------------|--------------|---------|
| 1      | 6.201         | VV   | 0.1764      | 1.03656e4    | 927.12408    | 49.2435 |
| 2      | 7.264         | VB   | 0.1923      | 1.06840e4    | 875.73108    | 50.7565 |

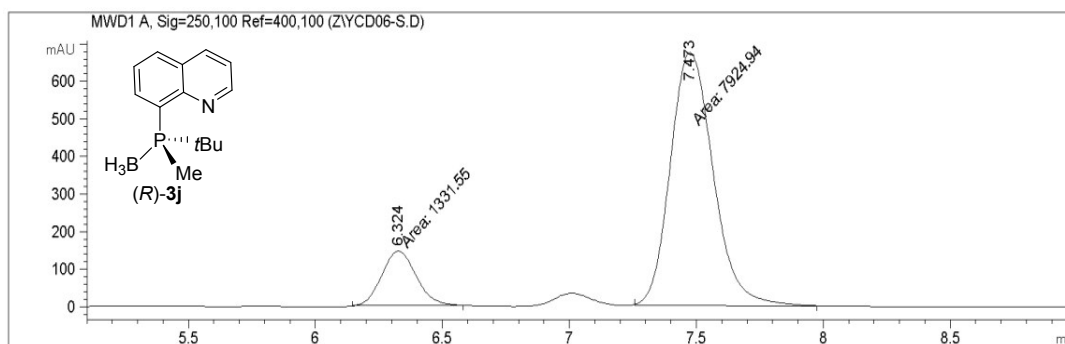

| Peak # | RetTime [min] | Type | Width [min] | Area [mAU*s] | Height [mAU] | Area %  |
|--------|---------------|------|-------------|--------------|--------------|---------|
| 1      | 6.324         | MM   | 0.1537      | 1331.55420   | 144.35512    | 14.3851 |
| 2      | 7.473         | MM   | 0.1960      | 7924.94189   | 673.93359    | 85.6149 |

### Chiral HPLC chromatographic analysis of (*S*)-**3j**

Condition: Daicel Chiralcel OD-H, *n*-hexane/*i*-PrOH = 98/2, UV = 250 nm, flow rate: 1.0 mL/min, retention time: t (major) = 6.791 min, t (minor) = 7.931 min, ee = 71%.

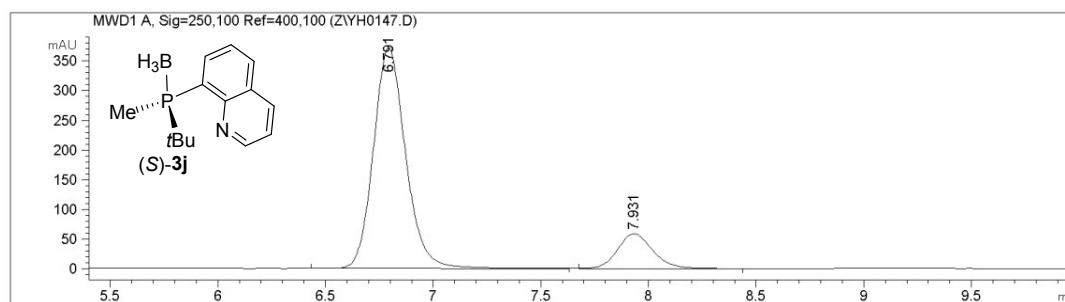

| Peak # | RetTime [min] | Type | Width [min] | Area [mAU*s] | Height [mAU] | Area %  |
|--------|---------------|------|-------------|--------------|--------------|---------|
| 1      | 6.791         | BB   | 0.1576      | 722.98175    | 70.54803     | 85.6130 |
| 2      | 7.931         | BB   | 0.1728      | 121.49510    | 10.83360     | 14.3870 |



Chiral HPLC chromatographic analysis of (*R*)-**3k**

Condition: Daicel Chiralcel OD-H, *n*-hexane/*i*-PrOH = 98/2, UV = 254 nm, flow rate: 0.8 mL/min, retention time: t (major) = 5.752 min, t (minor) = 6.206 min, ee = 77%.

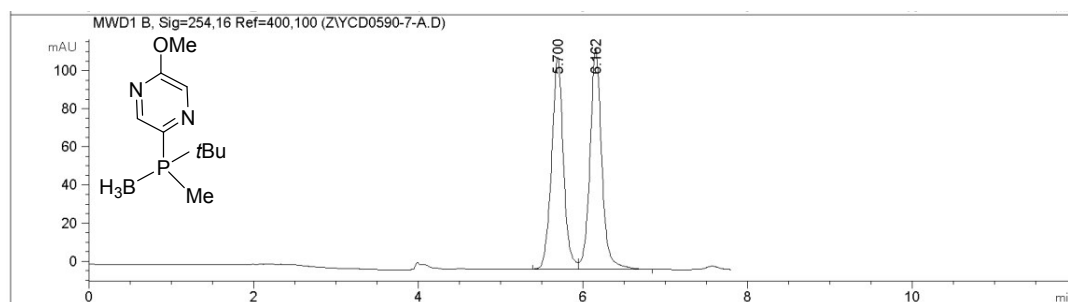

| Peak # | RetTime [min] | Type | Width [min] | Area [mAU*s] | Height [mAU] | Area %  |
|--------|---------------|------|-------------|--------------|--------------|---------|
| 1      | 5.700         | EV   | 0.1498      | 1101.96777   | 111.02318    | 49.0171 |
| 2      | 6.162         | VB   | 0.1502      | 1146.15967   | 115.12369    | 50.9829 |

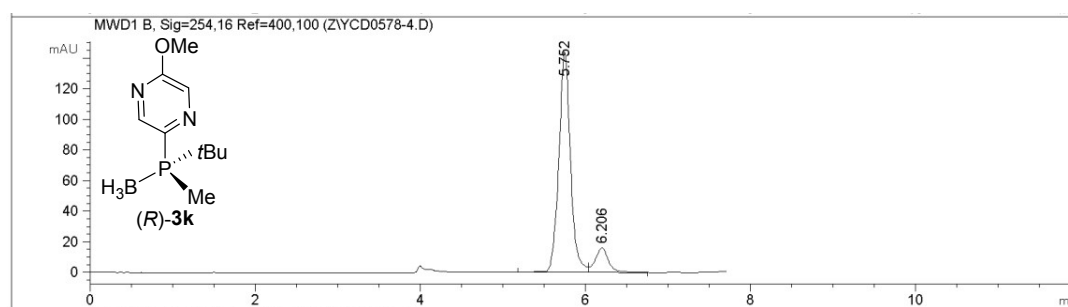

| Peak # | RetTime [min] | Type | Width [min] | Area [mAU*s] | Height [mAU] | Area %  |
|--------|---------------|------|-------------|--------------|--------------|---------|
| 1      | 5.752         | EV   | 0.1468      | 1417.11865   | 144.04102    | 88.7869 |
| 2      | 6.206         | VB   | 0.1627      | 178.97156    | 16.22691     | 11.2131 |

Chiral HPLC chromatographic analysis of (*R*)-**3I**

Condition: Daicel Chiralcel OD-H, *n*-hexane/*i*-PrOH = 98/2, UV = 254 nm, flow rate: 0.8 mL/min, retention time: *t* (minor) = 11.874 min, *t* (major) = 13.672 min, ee = 94%.

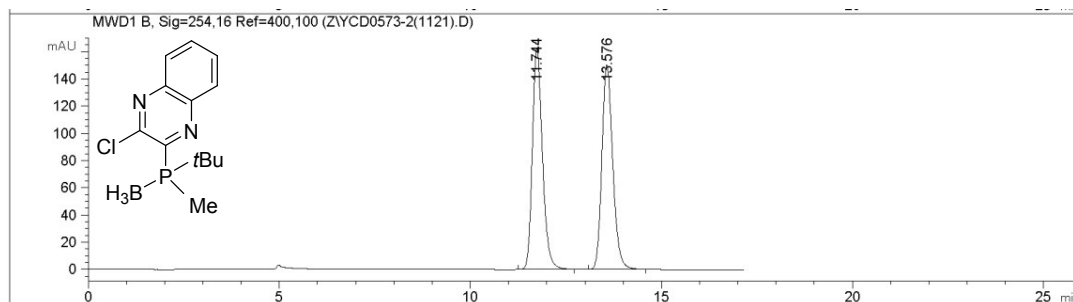

| Peak # | RetTime [min] | Type | Width [min] | Area [mAU*s] | Height [mAU] | Area %  |
|--------|---------------|------|-------------|--------------|--------------|---------|
| 1      | 11.744        | BB   | 0.2825      | 2982.82666   | 162.20386    | 50.0961 |
| 2      | 13.576        | BB   | 0.3049      | 2971.38452   | 150.14647    | 49.9039 |

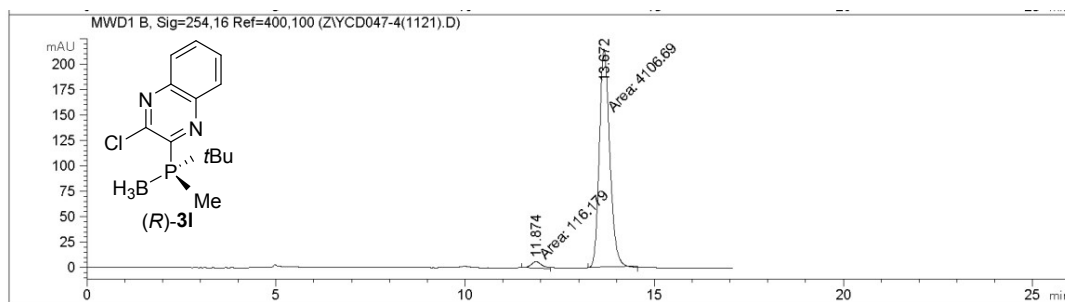

| Peak # | RetTime [min] | Type | Width [min] | Area [mAU*s] | Height [mAU] | Area %  |
|--------|---------------|------|-------------|--------------|--------------|---------|
| 1      | 11.874        | MM   | 0.3169      | 116.17851    | 6.10941      | 2.7512  |
| 2      | 13.672        | MM   | 0.3198      | 4106.69238   | 214.00578    | 97.2488 |
